# Supplementary material for: Optimization of genetic distance threshold for inferring the CRF01_AE molecular network based on next-generation sequencing
Source: Front Cell Infect Microbiol. 2024 May 22;14:1388059. doi: 10.3389/fcimb.2024.1388059 (PMC11155296; doi:10.3389/fcimb.2024.1388059)
Supplement: Supplementary file 2 [file Table_1.xlsx]

## Sheet: CRF01_AE
071208_2016_AE	~~~~~~~~~~~~~~~TGGCAACGACCCCTTGTCACAGTAAAAATAGGAGGACAGCTGAAAGAAGCTCTATTAGATACAGGAGCAGATGATACAGTATTAGAAGACATAAATTTGCCAGGAAAATGGAAACCAAAAATGATAGGGGGAATTGGAGGTTTTATCAAGGTAAGGCAATATGATCAGATACYTATAGAAATTTGTGGAAAAAAGGCTATAGGTWCAGTGTTAGTAGGACCTACACCTGTCAACATAATTGGRCGAAATATGTTGACTCAGMTTGGTTGTACTTTAAATTTTCCAATTAGTCCTATTGACACTGTACCAGTAAAATTAAAGCCAGGAATGGATGGACCAAARGTTAAACAGTGGCCATTGACAGAAGAAAAAATAAAAGCATTA…
082314_2016_AE	~~~~~~~~~~~~~~~TGGCAACGACCCGTTGTCACAGTAAAAATAGAAGGACAGCTGAAAGAAGCTCTATTAGATACAGGAGCAGATGATACAGTATTAGAAGATATAAATTTRCCAGGAAAATGGAAACCAAAAATGATAGGGGGAATTGGAGGTTTTATCAAGGTAAAACAATATGATCAGATACTTATAGAAATTTGTGGAAAAAGGGCTATAGGTACAGTATTAGTAGGACCTACACCTGTCAACATAATTGGAMGAAATATGTTGACTCAGATTGGTTGTACTTTAAATTTCCCAATTAGTCCTATTGACACTGTACCAGTAAAATTAAAGCCAGGAATGGATGGACCAAAGGTTAAGCAGTGGCCATTGACTGAAGAAAAAATAAAAGCCTTA…
083028_2016_AE	~~~~~~~~~~~~~~~TGGCAACGACCCCTTGTCAYAATAAAAATAGAGGGACAGCTAAAAGAAGCTCTATTAGATACAGGAGCAGATGATACAGTATTAGAAGATATAAATTTGYCAGGAAAATGGAAACCAAAAATGATAGGGGGAATTGGAGGTTTTATTAAGGTAAGGCAATATGATCAGGTACTTATAGAAATTTGTGGGAAAAAGGCTATAGGTACAGTATTAGTAGGACCCACGCCTGTCAACATAATTGGACGAAATATGTTGACTCAGCTTGGTTGTACTTTAAATTTCCCAATTAGTCCTATTGACACTGTACCAGTAGCATTAAAGCCAGGAATGGATGGACCAAAGGTTAAACAGTGGCCATTGACAGAAGAAAAAATAAAAGCATTA…
122709_2016_AE	~~~~~~~~~~~~~~~TGGCAACGACCCCTTGTCACAATAAAAATAGGAGGACAGCTAAGAGAAGCTCTATTAGATACAGGAGCAGATGATACAGTATTAGAAGATATAAATTTGCCAGGAAAATGGAAACCAAAAATGATAGGGGGAATTGGAGGTTTTATCAARGTAAGGCAATATGATCAGATATCTATAGAAATTTGTGGAAAAAAGGCTATAGGTACAGTGTTAGTAGGACCTACACCTRTCAACATAATTGGACGAAATATGTTGACTCAGCTTGGTTGTACTTTAAATTTCCCAATYAGTCCTATTGAYACTGTACCAGTAAMATTAAAGCCAGGAATGGATGGACCAAARGTYAAACARTGGCCATTGACAGAAGAAAAAATAAAAGCATTA…
122715_2016_AE	~~~~~~~~~~~~~~~TGGcAGCGACCCCTTGTCACAATAAAAATAGAAGGACAGCTAAGAGAAGCTCTATTAGATACAGGAGCAGATGATACAGTATTAGAAGATATAAATTTGCCAGGAARATGAAAACCAAAAATGATAGGGGGAATTGGAGGTYTTATCAAGGTAAGGCAATATGATCAGATACTTATAGAAATTTGTGGAAAAAAGGCTATAGGTACAGTATTAGTAGGACCYACACCTGTCAACATAATTGGACGAAACATGTTGACTCAGCTTGGTTGTACTTTAAATTTCCCAATTAGTCCTATTGACACTGTACCAGTAAAATTAAAGCCAGGAATGGATGGACCAAAGGTTAAACAGTGGCCATTAACAGAAGAAAAAATAAAAGCATTA…
302955_2016_AE	cctcaaatcactctttggcaacgaccccttgtcacagtaaaaataggaggacagctaagagaagctctattagatacaggagcagatgatacagtattagaagaaataaatttaccaggaaaatggaaaccaaaaatgatagggggaattggaggttttattaaggtaaggcaatatgatcagatacttatagaaatttgtggaaaaaaggctgtaggtacagtgttagtaggacccacgcctgtcaacataattggccgaaatatgttgactcagattggttgtactttaaatttcccaattagtcctattgacactgtaccagtaaaattaaagccaggaatggatggaccaaaggttaaacartggccattgacagaagaaaaaataaaagcatta…
302984_2016_AE	cctcaaatcactctttggcaacgaccccttgtcacagtaaaaataggagggcagctaawagaagctctattagatacaggagcagatgatacagtattagaagatataaatttgccaggaaaatggaaaccaaaaatgatagggggaattggaggttttatcaaggtaaggcaatatgatcagatacttatagaaatttgtggaaaaarggctataggwacagtgttagtaggacctacacctrtcaacataattggacgaaatatgttgactcagattggttgtactttaaatttcccaattagtcctattgacactgtaccagtaacattaaaaccaggaatggatggaccaaaggttaaacagtggccattgacaraagaaaaaataaaagcatta…
130015_2016_AE	~~~~~~~~~~~~~~~TGGCAACGACCCCTTGTCACAGTAAAAATAGAGGGACAGCTAAAAGAAGCTCTATTAGATACAGGAGCAGATGATACAGTATTAGAAGATATAAATTTGCCAGGAAAATGGAAACCAAAAATGATAGGGGGAATTGGAGGTTTTATTAAGGTAAGGCAATATGATCAGATACTTATAGAAATTTGTGGGAAAAGGGCTATAGGTACAGTRTTAGTAGGACCCACRCCTGTCAACATAATYGGACGAAATATGTTGACTCAGCTTGGTTGTACTTTAAATTTCCCAATTAGTCCTATTGACACTGTACCAGTAWCATTAAAGCCAGGAATGGATGGACCAAAGGTTAAACAGTGGCCATTGACAGAAGAAAAAATAAAAGCATTA…
302729_2016_AE	cctcaaatcactctttggcaacgaccccttgtcacaataaaaataggaggacagataaaagaagctctattagatacaggagcagatgatacagtgttagaagatatagatttgccaggaagatggaaaccaaaaatgatagggggaattggaggttttattaaagtaagacaatatgaggatatacctatagaaatttgtgggaaaaaagctataggtacagtattagtaggacctacacctgtcaacataattggacgaaatatgttgactcagcttggttgtactttgaatttcccaattagtcctattgacactgtaccagtaacattaaagccaggaatggatggaccaaaggttaaacagtggccattgacagaagaaaagataaaagcatta…
302915_2016_AE	cctcaaatcactctttggcaacgaccccttgtcacagtaagagtaggaggacagctaaaagaagctctattagatacaggagcagatgatacagtattagaagatataaatttgccaggaaaatggaaaccaaaaatgatagggggaattggaggttttatcaaagtaagacaatatgatcagatacttatagaaatttgtggaaaaaaggctataggtacagtattagtaggacctacacctgtcaacataattgggcgaaatatgttgactcagattggctgtactttaaatttcccaatcagtcctattgacactgtaccagtaaaattaaaaccaggaatggatgggccaaaggttaaacagtggccattgacagaagaaaaaataaaagcatta…
022114_2017_AE	~~~~~~~~~~~~~~~TGGCAACGACCCCTTGTCACAGTAAAAATAGGAGGACAGTTAAAAGAAGCTCTGTTAGATACAGGAGCAGATGATACAGTATTAGAAGATATAAATTTGCCAGGRAAGTGGAAACCAARAATGATAGGGGGAATTGGAGGTTTTATCAAAGTAAGGCAATATGATCAGATACTTATAGAAATTTGTGGAAAAAAGGCTATAGGTACAGTRTTAGTAGGACCTACACCTGTCAAYATAATTGGACGAAATATGTTAACTCAGATTGGTTGTACTTTAAATTTCCCCATYAGTCCTATTGACACTGTACCAGTAAAATTAAAGCCAGGAATGGATGGACCAAAGGTTAAACAGTGGCCATTGACAGAAGAAAAAATAAAAGCATTA…
032104_2017_AE	~~~~~~~~~~~~~~~TGGCAACGACCCCTTGTCACAGTAAAAATAGGGGGACAGSTRAAAGARGCTCTATTAGATACAGGAGCAGATGATACAGTATTAGAAGATATAAATTTRCCAGGAAAATGGAAACCAAAAATGATAGGGGGAATTGGAGGTTTTATCAAAGTAAGGCAATATGATCAGATACTTRTAGAAATTTGTGGAAAAAAGGCTATAGGTACAGTRTTARTAGGACCTACACCTGTCAACATAATTGGACGAAATMTGTTGACTCAGATTGGTTGTACTTTAAATTTCCCAATYAGTCCTATTGACACTGTACCAGTAAAATTAAARCCAGGAATGGATGGACCAARAGTTAAACAGTGGCCATTGACAGAAGAAAAAATAAAAGCATTA…
050910_2017_AE	~~~~~~~~~~~~~~~TGGCAACGACCCCTTGTCACAGTAAAAATAGGAGGACAATTAAAAGAAGCTCTATTAGACACAGGAGCAGATGATACAGTATTAGAAGATATAAATTTGCCAGGGAAATGGAAACCAAAAATGATAGGGGGAATTGGAGGTTTTATCAAGGTAAGACAATATGATCAGATACTTATAGAAATTTGTGGAAAAAAGGCTATAGGTACAGTGTTAGTAGGACCTACACCTGTCAACATAATTGGAAGAAACATGTTGACTCAGATTGGTTGTACTTTAAATTTCCCAATTAGTCCTATTGACACGGTACCAGTAAAACTAAAGCCAGGAATGGATGGACCAAAAGTTAAACAGTGGCCATTGACAGAAGAAAAAATAAAAGCATTA…
050905_2017_AE	~~~~~~~~~~~~~~~TGGCAACGACCCCTTGTCACAGTAAAAATAGGAGGACAGCTGAGAGAAGCTCTATTAGATACAGGAGCAGATGATACAGTATTAGAAGATATARATTTGCCAGGAAAATGGAAACCAAAAATGATAGGGGGAATTGGAGGTTTTATCAAAGTAAAGCAATATGATCAGATACTTATAGAAATTTGTGGAAAAAGGGCTGTAGGTACAGTATTGATAGGRCCTACACCTGTCAACATAATTGGACGAAATATGTTGACTCAGATTGGTTGTACTCTAAATTTCCCAATTAGTCCTATTGAMACTGTACCAGTAACATTAAAGCCAGGAATGGATGGGCCAAGGATCAAACAGTGGCCATTGACAGAAGAAAAAATAATAGCATTA…
130023_2017_AE	~~~~~~~~~~~~~~~TGGCAACGACCCCTTGTCACAGTAAAAATAGGAGGACAGCTGAAGGAAGCTCTATTAGATACAGGAGCAGATGATACAGTATTAGAAGATATAAATTTGCCAGGAAAATGGAGACCAAAAATGATAGGGGGAATTGGAGGTTTTATTAAAGTAAGGCAATATGATCAGATACTTATAGAAATTTGTGGAAAAAAGGCTATAGGTACAGTGTTGGTAGGACCTACACCTGTCAACATAATTGGACGAAATATGTTGACTCAGATTGGTTGTACTTTAAATTTCCCAATTAGTCCTATTGACACTGTACCAGTAACATTAAAGCCAGGAATGGATGGACCAAAGATTAAACAATGGCCATTGACAGAAGAAAAAATAAAAGCATTA…
322858_2017_AE	CCTCAAATCACTCTTTGGCAACGACCCCTTGTCACAGTAAAAATAGGAGGACAGCTGAAGGAAGCTCTATTAGATACAGGAGCAGATGATACAGTATTAGAAGATATAAATTTGCCAGGAAAATGGAGACCAAAAATGATAGGGGGAATTGGAGGTTTTATTAAAGTAAGGCAATATGATCAGATACTTATAGAAATTTGTGGAAAAAAGGCTATAGGTACAGTGTTGGTAGGACCTACACCTGTCAACATAATTGGACGAAATATGTTGACTCAGATTGGTTGTACTTTAAATTTCCCAATTAGTCCTATTGACACTGTACCAGTAACATTAAAGCCAGGAATGGATGGACCAAAGATTAAACAATGGCCATTGACAGAAGAAAAAATAAAAGCATTA…
101711_2017_AE	~~~~~~~~~~~~~~~TGGCAACGACCCCTTGTCACAGTAAAAATAGGAGGACAGCTGAAAGAAGCTCTATTAGATACAGGAGCAGATGATACAGTATTAGAAGATATAAATTTGCCAGGAAAATGGAAACCAAAAATGATAGGAGGAATTGGAGGTTTTATCAAGGTAAGGCAATATGATCAGATACTTATAGAAATTTGTGGAAAAAAGGCGATAGGTACAGTWTTAGTAGGACCTACACCTGTCAACATAATTGGACGAAATATGTTGACTCAGATTGGTTGTACTTTAAATTTCCCAATAAGCCCTATTGATACTGTACCAGTAAAATTAAAGCCAGGAATGGATGGACCAAAGGTTAAACAGTGGCCATTGACAGAAGAAAAAATAAAAGCATTA…
303615_2017_AE	CCTCAAATCACTCTTTGGCAACGACCCCTTGTCACAATAAAAGTAGGAGGACAGATAAAAGAAGCTCTATTAGATACAGGAGCAGATGATACAGTATTAGAAGATATAAATTTGCYASGAAAATGGAAACCAAAAATGATAGGGGGAATTGGAGGTTTTATTAAGGTAAGACAATATGATCAGATACTTATAGAAATTTGTGGAAAAAAGGCTATAGGTACAGTGTTAGTAGGACCCACGCCTGTCAAYATAATTGGACGAAATATGTTGACTCAGCTTGGTTGTACTTTAAATTTCCCAATTAGTCCTATTGACACTGTACCAGTAAAATTAAAGCCAGGAATGGATGGACCAAAGGTTAAACAGTGGCCATTGACAGAAGAAAAAATAAAAGCATTA…
122611_2017_AE	cctcaaatcactctttggcaacgacccatggtcacagtaaaaatagggggacagctgaaagaggctctattagatacaggagcagatgatacagtattagaagatataaatttgccaggaaaatggaaaccaaaaatgatagggggaattggaggttttatcaaagtaaggcaatatgatcagatacttatagaaatttgtggaaaaaaggctataggtacagtgttagtaggacccacacctatcaacataattggacgaaatatgttgactcaggtgggttgtactttaaacttcccaattagtcctattaacactataccagtaacattaaaaccaggaatggatggaccaagggttaaacagtggccattgacagaagaaaaaataaaagcatta…
303255_2017_AE	CCTCAAATCACTCTTTGGCAACGACCCCTTGTCACAATAAAAATAGGAGGGCAGTTAAAAGAAGCTCTTTTAGATACAGGAGCAGATGACACGGTATTAGAAGATATAAATTTGCCAGGAAAATGGAAACCAAAAATGATAGGGGGAATTGGAGGTTTTATTAAGGTAAGGCAATATGATCAGATACTTATTGAAATTTGTGGAAGAAAAGCTATAGGTACAGTGTTAGTAGGACCCACGCCTGTCAACATAATTGGACGAAATATGTTGACTCAGCTTGGTTGTACTTTAAATTTCCCAATTAGTCCTATTGATACTGTACCAGTAAAATTAAAGCCAGGAATGGATGGACCAAAAGTTAAACAGTGGCCATTGACAGAAGAAAAAATAAAAGCCTTA…
303344_2017_AE	CCTCAAATCACTCTTTGGCAACGACCCCTTGTCACAATAAAAATAGRAGGACAGCTAAAAGAAGCTCTGTTAGATACAGGAGCAGATGATACAGTATTAGAAGATATAAATTTGCCAGGAAAATGGAAACCAAAAATGATAGGGGGAATTGGAGGTTTTATTAARGTAAGGCAATATGATCAGATACTTATAGAAATTTGTGGAAAAAAGGCTATAGGTACAGTGTTAGTAGGACCCACGCCTGTCAACATAATTGGACGAAATATGTTGACTCAGCTTGGTTGTACTTTAAATTTCCCAATTAGTCCTATTGACACTGTACCAGTATCATTAAAGCCAGGAATGGATGGACCAAAGGTTAAACAGTGGCCATTGACAGAGGAAAAAATAAAAGCATTA…
303678_2018_AE	~~~~~~~~~~~~~~~TGGCAACGACCCGTTGTCACAGTAAAAGTAGCAGGACAGTTGAAAGAAGCTCTATTAGATACAGGAGCAGATGACACAGTATTAGAAGATATAAATTTGCCAGGAAAATGGAAACCAAAAATGATAGGGGGAATTGGAGGTTTTATCAAAGTAAGGCAATTTGATCAGATACTTATAGAAATTTGTGGAAAAAGGGCTATAGGTTCAGTATTAGTAGGGCCTACACCTGTCAACATAATTGGACGAAATATGTTGACTCAGCTTGGTTGTACTTTAAATTTCCCAATTAGTCCTATTGACACTGTACCTGTAACATTAAAGCCAGGAATGGATGGGCCAAAGGTTAAACAGTGGCCATTAACAGAAGAAAAAATAAAAGCATTA…
303664_2018_AE	~~~~~~~~~~~~~~~TGGCAACGACCCGTTGTCACAGTAAAAGTAGCAGGACAGTTGAAAGAAGCTCTATTAGATACAGGAGCAGATGACACAGTATTAGAAGATATAAATTTGCCAGGAAAATGGAAACCAAAAATGATAGGGGGAATTGGAGGTTTTATCAAAGTAAGGCAATATGATCAGATACTTATAGAAATTTGTGGAAAAAGGGCTATAGGTACAGTATTAGTAGGGCCTACACCTGTCAACATAATTGGACGAAATATGTTGACTCAGATTGGTTGTACTTTAAATTTCCCAATTAGTCCTATTGACACTGTACCTGTAACATTAAAGCCAGGAATGGATGGGCCAAAGGTTAAACAGTGGCCATTAACAGAAGAAAAAATAAAAGCATTA…
303705_2018_AE	~~~~~~~~~~~~~~~TGGCAACGACCCCTTGTCACAGTAAAAATAGGAGGACAGCTAAGAGAAGCTCTATTAGATACAGGAGCAGATGATACAGTATTAGAAGAGATAAATTTGCCAGGAAAATGGAAACCAAAAATGATAGGGGGAATTGGGGGTTTTATTAAAGTAAGGCAATATGATCAGATACCCATAGAAATTTGTGGCAAAAGGGCTATAGGTACAGTGTTAGTAGGACCCACGCCTRTCAACATAATTGGACGAAAYATGTTGACTCAGCTTGGTTGTACTTTAAATTTCCCAATTAGTCMTATTGACACAGTACCAGTAAAATTAAAGCCAGGAATGGATGGACCAAAGGTTAAACAGTGGCCATTGACAGAAGAAAAAATAAAAGCATTA…
020610_2018_AE	~~~~~~~~~~~~~~~TGGCAACGACCCCTTGTCACAGTAAAAATAGGAGGACAGTTAAGAGAAGCTCTATTAGATACAGGAGCAGATGATACAGTATTAGAAGAGATAAATTTGCCAGGAAAATGGAAACCAAAAATGATAGGGGGAATTGGGGGTTTTATTAAAGTAAGGCAATATGATCAGATACCCATAGAAATTTGTGGYAAAAAGGCTATAGGTACAGTGTTAGTAGGACCCACGCCTGTCAACATAATTGGACGAAATATGTTGACTCAGCTTGGTTGTACTTTAAATTTCCCAATTAGTCCTATTGACACAGTACCAGTAAAMTTAAAGCCAGGAATGGATGGACCAAAGGTTAAACAGTGGCCATTGACAGAAGAAAAAATAAAAGCATTA…
303765_2018_AE	~~~~~~~~~~~~~~~TGGCAACGACCCCTTGTCACAATAAAAATAGAGGGACAGCTAAAAGAAGCTCTATTAGATACAGGAGCAGATGATACAGTATTAGAAGATATAAATTTGCCAGGAAAATGGAAACCAAAAATGATAGGGGGAATTGGAGGYTTTATTAAGGTAAGGCAATATGATCAGATACTTATAGAAATTTGTGGAAAAAGGGCTATAGGTACAGTrTTAGTAGGACCCACGCCTGTCAACATAATTGGACGAAATATGTTGACTCAGCTTGGTTGTACTTTAAATTTCCCAATTAGTCCTATTGACACTGTACCAGTAGCATTAAAGCCAGGAATGGATGGACCAAAGGTTAAACAGTGGCCATTGACAGAAGAAAAAATAAAAGCATTA…
303798_2018_AE	~~~~~~~~~~~~~~~TGGCAACGACCCCTTGTCACAATAAAAATAGAGGGACAGCTAAAAGAAGCTCTATTAGATACAGGAGCAGATGATACAGTATTAGAAGATATAAATTTGCCAGGAAAATGGAAACCAAAAATGATAGGGGGAATTGGAGGTTTTATTAAGGTAAGGCAATATGATCAGATACTTATAGAAATTTGTGGRAAAAAGGCTATAGGTACAGTATTAGTAGGACCCACGCCTGTCAACATAATTGGACGAAATATGTTGACTCAGCTTGGTTGTACTTTAAATTTCCCAATTAGTCCTATTGACACTGTACCAGTAGCATTGAAGCCAGGAATGGATGGACCAAAGGTTAAACAGTGGCCATTGACAGARGAAAAAATAAAAGCATTA…
303830_2018_AE	~~~~~~~~~~~~~~~TGGCARCGACCCATTGTCACAGTAAAAATAGAAGGACAGCTGAAAGARGCTCTATTAGATACAGGAGCAGATGATACAGTATTAGAAGATATAAATTTGCCAGGAAAATGGAAACCAAAAATGATAGGGGGAATTGGAGGTTTTATCAAGGTAAGRCAATATGATCAGATAMTTATAGAAATTTGTGGGAAAAAGGCTATAGGTACAGTATTAGTAGGACCTACACCTGTCAACATAATTGGRCGAAACATGTTGACGCAGATTGGTTGTACTTTAAATYTCCCAATTAGTCCTATTGACACTGTACCAGTAAAATTAAAACCAGGAATGGATGGACCAAARGTTAAACAGTGGCCATTGACAGARGAAAAAATAAAAGCATTA…
304019_2018_AE	~~~~~~~~~~~~~~~TGGCAACGACCCCTTGTTACAGTAAAAATAGGGGGACAGCTGAAAGAAGCTCTATTAGATACAGGAGCAGATGATACAGTATTAGAAGAYATAAATTTGCCAGGGAGATGGAAACCAAAAATGATAGGGGGAATTGGAGGTTTTATCAAGGTAAGGCAATATGATCAGATACCTATAGAAATTTGTGGAAAGAAGGCTGTTGGTACAGTGTTAATAGGACCTACACCTGTCAACATAATTGGACGAAATATGTTGACTCAGATTGGTTGTACTTTAAATTTCCCAATTAGTCCTATTGATACTGTACCAGTAAAATTAAAGCCAGGAATGGATGGACCAAAGRTTAAACAGTGGCCATTAACAGCAGAAAAAATARAAGCATTA…
061913_2018_AE	CCTCAAATCACTCTTTGGCAACGRCCCGTTGTCACAGTAAAAGTAGCAGGACAGTTGAAAGAAGCTCTATTAGATACAGGAGCAGATGACACAGTATTAGAAGATATAAATTTGCCAGGAAAATGGAAACCAAAAATGATAGGGGGAATTGGAGGTTTTATCAAAGTAAGGCAATATGATCAGATACTTATAGAAATTTGTGGAAAAAGGGCTATAGGTACAGTATTAGTAGGGCCTACACCTGTCAACATAATTGGACGAAATATGTTGACTCAGCTTGGTTGTACTTTAAATTTCCCAATTAGTCCTATTGACACTGTACCTGTAACATTAAAGCCAGGAATGGATGGGCCAAAGGTTAAACAGTGGCCATTRACAGAAGAAAAAATAAAAGCATTA…
062604_2018_AE	CCTCAAATCACTCTTTGGCAACGACCYMTTGTCACARTAAAAATAGAAGGACAGMTRAAAGAAGCTCTATTAGAYACAGGAGCAGATGATACAGTATTAGAAGATATARATTTGCCAGGRARRTGGAAACCAAAAATGATAGGGGGAATTGGAGGTTTTATYAARGTAAGRCAATATGATCAGATACWTATAGAAATTTGTGGAAAARGGGCTATAGGTACAGTGTTAGTAGGACCTACACCTGTYAACATAATTGGACGAAATATGTTGACTCAGATTGGTTGTACYTTAAATTTYCCAATYAGTCMTATTGAMACTGTACCAGTAAMATTAAAGCCAGGAATGGATGGACCAAAGGTTAAACARTGGCCATTGACARAAGARAAAATARAAGCATTR…
304031_2018_AE	~~~~~~~~~~~~~~~TGGCAACGACCCCTTGTCACAGTAAAAATAGAAGGACAGTTGAGAGAAGCTCTATTAGATACAGGAGCAGATGATACAGTATTAGAAGATATAAACTTGCCAGGGAAATGGAAACCAAAAATGATAGGGGGAATTGGAGGTTTTATCAAGGTAAGGCAATATGATCAGATACTTATAGAAATTTGTGGAAAAAAGGCTATAGGTACAGTATTGGTAGGACCTACACCTGTCAACATAATTGGACGAAATATGTTGACTCAGCTTGGTTGTACTCTAAATTTCCCAATTAGTCCTATTGACACTGTACCAGTAACATTAAAGCCAGGAATGGATGGACCAAAGGTCAAACAGTGGCCATTGACAGAAGAAAAAATAAAAGCATTA…
090421_2018_AE	CCTCAAATCACTCTTTGGCAACGACCCCTTGTCACAGTAAAAATAGGAGGACAGCTAAAAGAAGCTCTATTAGATACAGGAGCAGATGATACAGTATTAGAAGAAATARATTTGCCAGGAAAATGGAAACCAAAAATGATAGGGGGAATTGGAGGTTTTATTAAGGTAAGGCAATATGATSAGATACYTATAGAAATTTGTGGAAAAAGGGCTATAGGTACAGTATTAGTRGGACCCACGCCTGTCAACATAATTGGACGAAATATGTTGACTCAGATTGGTTGTACTCTAAATTTCCCAATTAGTCCTATTGACACTGTACCAGTAACATTAAAGCCAGGAATGGATGGGCCAAAGGTTAAACAGTGGCCACTGACAGAAGAAAAAATAAAAGCATTA…
323432_2018_AE	~~~~~~~~~~~~~~~TGGCAACGACCCCTTGTYACARTAAARATAGGAGGACAGCTGAARGARGCTCTATTAGATACAGGAGCAGATGATACAGTATTAGAAGAWATAAATTTGCCAGGAAAATGGAAACCAAAAATGATAGGAGGAATTGGAGGTTTTATCAAGGTAAGGCARTATGATCAGRTACYYATAGAAATTTGTGGAAAAAAGGCGATAGGTACAGTTTTAGTAGGACCTACACCTATCAACATAATTGGACGAAATATGTTGACTCAGATTGGTTGTACTTTAAATTTCCCAATAAGCCCTATTGAAACTGTACCAGTAAAATTAAAGCCAGGAATGGATGGACCAAAGGTTAAACAGTGGCCATTGACAGAAGAAAAGATAAAAGCATTA…
304066_2018_AE	~~~~~~~~~~~~~~~TGGCAACGACCCATTGTCACAGTAAAAATAGGAGGACAGCTAAAAGAAGCTTTATTAGATACAGGAGCAGATGATACAGTATTAGAAGATGTAGAGTTGCCAGGAAAATGGAAACCAAAAATGATAGGGGGAATTGGAGGTTTTATCAAAGTAAAGCAATATGATCAGATATCTCTAGAAATTTGTGGAAAAAAGGCTATAGGTACAGTGTTAGTAGGACCTACCCCCGTCAACATAATTGGACGAAATATGTTGACTCAGATWGGTTGTACATTAAATCTTCCAATTAGTCCTATTGACACTGTACCAGTAACATTAAAGCCAGGAATGGATGGGCCAAAGGTTAAACAGTGGCCATTGACAGARGAAAAAATAAAAGCATTA…
100928_2018_AE	~~~~~~~~~~~~~~~TGGCAACGACCCCTTGTCACAGTAAAAATAGGAGGACAGCTGAAGGAAGCTCTATTAGATACAGGAGCAGATGATACAGTATTAGAAGATATAAATTTGCCAGGAAAATGGAGACCAAAAATGATAGGGGGAATTGGAGGTTTTATTAAAGTAAGGCAATATGATCAGATACTTATAGAAATTTGTGGAAAAAAGGCTATAGGTACAGTGTTGGTAGGACCTACACCTGTCAACATAATTGGACGAAATATGTTGACTCAGATTGGTTGTACTTTAAATTTCCCAATTAGTCCTATTGACACTGTACCAGTAACATTAAAGCCAGGAATGGATGGACCAAAGATTAAACAATGGCCATTGACAGAAGAAAAAATAAAAGCATTA…
303718_2018_AE	~~~~~~~~~~~~~~~TGGCAACGACCCCTTGTCACAGTAAAAATAGGAGGACAGTTAAGAGAAGCTCTATTAGATACAGGAGCAGATGATACAGTATTAGAAGAGATAAATTTGCCAGGAAAATGGAAACCAAAAATGATAGGGGGAATTGGGGGTTTTATTAAAGTAAGGCAATATGATCAGATACCCATAGAAATTTGTGGYAAAAAGGCTATAGGTACAGTGTTAGTAGGACCCACGCCTGTCAACATAATTGGACGAAATATGTTGACTCAGCTTGGTTGTACTTTAAATTTCCCAATTAGTCCTATTGACACAGTACCAGTAAAMTTAAAGCCAGGAATGGATGGACCAAAGGTTAAACAGTGGCCATTGACAGAAGAAAAAATAAAAGCATTA…
303964_2018_AE	~~~~~~~~~~~~~~~TGGCAACGACCCCTTGTCACAATAAAAATAGAAGGACAGCTGAAAGAAGCTCTATTAGATACAGGAGCAGATGATACAGTGTTAGAAGATATAAATTTGCCAGGAAAATGGAAACCAAAATTGATAGGGGGAATTGGAGGTTTTATTAGGGTAAGGCAATATGATCAGATAAGTATAGAAATTTGTGGAAAAAAGGCTATAGGTACAGTGTTAGTAGGACCTACACCTGTCAACATAATTGGACGAAATATGTTGACTCAGCTTGGTTGTACTTTAAATTTTCCAATTAGTCCTATTGACACTGTACCAGTAACATTAAAGCCAGGAATGGATGGACCAAAGGTCAAACAGTGGCCATTGACAGAGGAAAAAATAAAAGCATTA…
050721_2019_AE	CCTCAAATCACTCTTTGGCAACGACCCCTTGTTACCATAAAAATAGAAGGACAGCTAAAAGAAGCTCTATTAGATACAGGAGCAGATGATACAGTATTAGAAGATATAAATTTGCCAGGAAAATGGAAACCAAAAATGATAGGGGGAATTGGAGGTTTTATTAAAGTAAGGCAATATGATCAGGTAGCTATAGAAATTTGTGGAAGAAAGGCCATAGGTACAGTGTTAGTAGGACCCACACCAGTCAACATAATTGGACGAAATCTGTTGACTCAGCTGGGTTGTACTTTAAATTTCCCAATTAGTCCTATTGACACTGTACCAGTAACATTAAAGCCAGGAATGGATGGACCAAAGGTTAAACAGTGGCCATTGACAGAAGAAAAAATAAAAGCATTA…
052117_2019_AE	CCTCAAATCACTCTTTGGCAACGACCYATTGTCACAGTAAAAATAGGAGGACAGCTAAAAGAAGCTCTATTAGATACAGGAGCAGATGATACAGTATTCGAAGATATAAATTTGCCAGGAAAATGGAAACCAARAATGATAGGGGGAATTGGAGGTTTTATTAAGGTAAGGCAATATGATCAGATAATTATAGAAATTTGTGGAAAAAAGGCTATAGGTACAGTATTAGTAGGACCCACGCCTGTCAACATAATTGGGCGAAATATGTTGACTCAGMTTGGTTGTACTTTAAATTTCCCAATTAGTCCTATTGACACTGTACCAGTAACATTAAAGCCAGGAATGGATGGACCAAAGGTTAAACAATGGCCATTAACAGAAGAAAAAATAAAAGCATTA…
061814_2019_AE	CCTCAAATCACTCTTTGGCAACGACCCCTTGTTACCATAAAAATAGAAGGACAGCTAAAAGAAGCTCTATTAGATACAGGAGCAGATGATACAGTATTAGAAGATATAAATTTGCCAGGAAAATGGAAACCAAAAATGATAGGGGGAATTGGAGGTTTTATTAAAGTAAGGCAATATGATCAGGTAGCTATAGAAATTTGTGGAAGAAAGGCCATAGGTACAGTGTTAGTAGGACCCACACCAGTCAACATAATTGGACGAAATCTGTTGACTCAGCTGGGTTGTACTTTAAATTTCCCAATTAGTCCTATTGACACTGTACCAGTAACATTAAAGCCAGGAATGGATGGACCAAAGGTTAAACAGTGGCCATTGACAGAAGAAAAAATAAAAGCATTA…
073016_2019_AE	CCTCAAATCACTCTTTGGCAACGACCCCTYGTCACAGTAAAAGTAGGAGGACARCTGAGAGAAGCTCTATTAGATACAGGAGCAGATGATACAGTATTAGAAGATATAAATTTGCCAGGAAAATGGAAACCAAAAATGATAGGGGGAATTGGAGGTTTTATCAAAGTAAGRCAATATGATCAGATACTTATAGAAATTTGTGGAAAAAGGGCTATGGGTACAGTBTTRGTAGGACCTACACCTGTCAACATAATTGGACGAAATATGTTGACTCAGATTGGTTGTACTTTAAATTTCCCAATTAGTCCTATTGACACTGTACCAGTATCATTAAAGCCAGGAATGGATGGACCAAAGGTTAARCAGTGGCCATTGACAGAAGAAAARATAAAAGCATTA…
619120_2019_AE	cctcaaatcactctttggcaacgaccccttgtcacaataaagatagaagggcaattaaaagaagctctattagatacaggagcagatgatacagtattagaagacataaatttgccaggaaaatggaaaccaaaaatgatagggggaattggaggttttatcaaagtaagacagtatgatcagatacccatagaaatytgtggamawaargctataggtacagtattagtaggacctacacctgtyaacataattggamgaaacatgttractcagcttggttgtactttaaatttyccaatyagtcctattgacactgtaccagtaacaytaaagccaggaatggatggaccaaaggttaaacagtggccattracagaagaraaaataraagcatta…
102408_2017_AE	~~~~~~~~~~~~~~~TGGCAACGACCCCTTGTCACAGTAAAAATAGGAGGACAGCTGAAAGAAGCTCTATTAGATACAGGAGCAGATGATACAGTATTAGAAGATATAAATTTGCCAGGAAAATGGAAACCAAAAATGATAGGGGGAATTGGAGGTTTTATCAARGTAAGGCAATATGATCAGATACCTATAGAAATTTGTGGAAAAAAGGCTATAGGTACAGTATTAGTAGGACCTACACCTGTCAACATAATTGGACGAAATATGTTGACTCAGATTGGTTGTACTTTAAATTTCCCAATTAGTCCTATTGACACTGTACCAGTAACATTAAAGCCAGGAATGGATGGGCCAAAGGTTAAACAGTGGCCATTAACAGAAGAAAAAATAAAAGCATTA…
304265_2019_AE	~~~~~~~~~~~~~~~TGGCAACGACCCCTTGTCACAGTAAAAGTAGAAGGACARCTGATAGAAGCTCTATTAGATACAGGAGCTGATGATACAGTATTAGAAGATATAAATTTGCCAGGRAAATGGAAACCAAAAATGATAGGAGGAATTGGAGGTTTTATCAAAGTAAGACAATATGATCAGATACTTATGGAAATCTGTGGAAAAAGGGCTATAGGTACAGTGTTAGTAGGACCTACGCCTGTCAACATAATTGGACGAAATATGTTGACCCAGATTGGKTGTACTYTAAATTTCCCAATTAGTCCTATTGACACTGTACCAGTAAAATTAAAGCCAGGAATGGATGGACCAAAGGTTAAACAATGGCCATTAACAGAAGAAAAAATAAAAGCATTA…
031909_2019_AE	CCTCAAATCACTCTTTGGCAACGACCCCTTGTCACAATAAAAATAGAGGGACAGCTAAAAGAAGCTCTATTAGATACAGGAGCAGATGATACAGTATTAGAAGATATAAATTTGCCAGGAAAATGGAAACCAAAAATGATAGGGGGAATTGGAGGTTTTATTAAGGTAAGGCAATATGATCAGATACTTATAGAAATTTGTGGGAAAAAGGCTATAGGTACAGTRTTAGTAGGACCCACGCCTGTCAACATAATTGGACGAAATATGTTGACTCAGCTTGGTTGTACTTTAAATTTCCCAATTAGTCCTATTGACACTGTACCAGTAGCATTGAAGCCAGGAATGGATGGACCAAAGGTTAAACAGTGGCCATTGACAGAAGAAAAAATAAAAGCATTA…
090505_2017_AE	~~~~~~~~~~~~~~~TGGCAACGACCCGTTGTCACARTAAAAATAGAAGGACAGGTAAAAGAAGCTCTATTAGATACAGGAGCAGATGATACAGTATTAGAAGATATAAATTTRCCAGGAAAATGGAAACCAAAAATGATAGGGGGWATTGGAGGTTTTATCAAAGTAAGGCARTATGATGAGATASYTATAGAAATTTGTGGAAAAAGGGCTATAGGTACAGTRTTAGTAGGACCTACACCTGTCAACATAATTGGACGAAAYATGTTGACTCAGATTGGTTGTACTTTAAATTTYCCAATTAGYCCTATTGACACTGTACCAGTAASATTAAAGCCAGGAATGGATGGRCCAAAGGTTAAACAGTGGCCATTRACAGAAGAAAAAATAAAAGCATTA…
010503_2016_AE	cctcaaatcactctttggcaacgaccccttgtcacaataagartaggaggacagmtaaaagaagctctattagatacaggagcagatgatacagtattagaagatataaatttgccaggaaaatggaaaccaaaaatgatagggggaattggaggttttatyaaggtaaggcaatatgatcagatacctatagaaatttgtggaaaaaaggctataggtacagtgttagtaggacctacacctgtcaacataattggacgaaatatgttgactcagcttggttgtactttaaatttcccaattagtcctattgacactgtaccagtaacattaaagccaggaatggatggaccaaaggttaaacagtggccattgacagaagaaaaaataaaagcatta…
010504_2016_AE	~~~~~~~~~~~~~~~TGGCAACGACCCCTCGTCGCAATAAAAATAGGAGGACAGCTAAGAGAAGCTCTATTAGATACAGGAGCAGATGATACAGTATTAGAAGATATAAATTTACCAGGAAAATGGAAACCAAAATTAATAGGGGGAATTGGAGGTTTTATCAAAGTAAGGCAATATGATCAGATACCTATAGAAATTTGTGGAAAAAAGGCTATAGGTACAGTGTTAGTAGGRCCTACACCTGTCAACATAATTGGACGAAATATGTTGACTCAGCTTGGTTGCACTTTAAAYTTCCCAATTAGTCCTATTGACACTGTACCAGTAACATTAAAGCCAGGAATGGATGGACCAAAGGTTAAACAATGGCCATTGACAGAAGAAAAAATAAAAGCATTA…
302513_2016_AE	cctcaaatcactctttggcaacgaccccttgtcacagtaaaaataggaggacagttgagagaagctctactagatacaggagcagatgatacagtattagaagaaataaatttgccaggaaaatggaaaccaaaaatgatagggggaattggaggttttatcaaagtaaggcaatatgatcagatacttatagaaatttgtggaaaaaaggctataggtacagtgttggtaggacctacacctgtcaacataattggacgaaatatgttgactcagcttggttgtactttaaatttcccaattagtcctattgacactgtaccagtaacattaaagccaggaatggatggaccaaaggttaaacagtggccattgacagaagaaaaaataaaagcatta…
011915_2016_AE	~~~~~~~~~~~~~~~TGGCAACGACCCCTTGTCACAATAAAAATAGGAGGACAGCTAAAAGAAGCTCTATTAGATACAGGRGCAGATGATACAGTATTAGAAGATATAAATTTGCCAGGAAAATGGAAACCAAGAATGATAGGGGGAATTGGAGGTTTTATCAAAGTAAGGCAATATGATCAGATAYCTATAGAAATTTGTGGAAAAAGGGCTATAGGTACAGTRTTAGTAGGACCTACACCTGTCAATATAATTGGACGAAATATGTTGACTCAGCTTGGTTGTACTTTAAATTTCCCAATTAGTCCTATTGACACTGTACCAGTAACATTAAAGCCAGGAATGGATGGACCAAAGGTTAAACARTGGCCATTGACAGAAGAAAAAATAAAAGCATTA…
021617_2016_AE	~~~~~~~~~~~~~~~TGGCAACGACCCYTAGTCACMATAAAAATAGGAGAACAGCTAAGRGAAGCTCTATTAGATACAGGAGCAGATGATACAGTATTAGAAGATATAAATTTGCCAGGAAAATGGAAACCAAAAATGATAGGGGGAATTGGAGGTTTTATCAARGTAAGRCAATATGATCAGATACCCATAGAAATTTGTGGAAARAGGGCTATAGGTACAGTGTTAGTAGGACCTACACCTATCAACATAATTGGACGAAATATGTTGACTCAGCTTGGTTGTACTTTAAATTTCCCAATTAGTCCTATTGACACTGTACCAGTAACATTAAAGCCAGGAATGGATGGACCAAARGTTAAACARTGGCCATTGACAGAAGAAAAAATAAAAGCATTA…
030114_2016_AE	~~~~~~~~~~~~~~~TGGCAACGACCCCTTGTCACAGTAAAAGTAGGAGGACAGTTGAGAGAAGCTCTATTAGATACAGGAGCAGATGATACAGTATTAGAAGATATAAATTTGCCAGGAAAATGGAAACCAAAAATGATAGGGGGAATTGGAGGTTTTATCAAAGTAAGACAATATGATCAKATACTTATAGAAATTTGTGRAAAAAAGGCTATAGGTACAGTATTAGTAGGACCTACACCTGTCAACATAATTGGACGAAATATGTTGACTCAACTCGGTTGTACTTTAAATTTTCCAATTAGTCYTATTGACACTGTACCAGTAAMATTAAAGCCAGGAATGGATGGACCAAAGGTTAAACAGTGGCCATTAACAGAAGAAAAAATAAAAGCATTA…
302665_2016_AE	cctcaaatcactctttggcaacgaccccttgtcacaataaaagtaggaggacagctaagagaagctctactagatacaggagcagatgatacagtattagaagatataaatttgccaggaraatggaaaccaaaaatgatagggggaattggaggttttatcaargtaaggcagtatgatgagatacttatagaaatctgtggaaaaagggctataggtacagtgttagtaggacctacacctgtcaacataattggacgaaatatgttgactcagcttggttgtactttaaatttcccaattagtcctattgacactgtaccagtaaaattaaaaccaggaatggatggaccaaaggttaaacagtggccattgacagaagaaaaaataaaagcatta…
031513_2016_AE	cctcaaatcactctttggcaacgaccccttgtcacagtaaaagtaggaggacagttgagagaagctytattagatacaggagcagatgatacagtattagaagatataaatttgccaggaaaatggaaaccaaaawtgatagggggaattggaggttttatcaaagtaaggcaatatgatcagatayttatagaaatttgtggaaaaaaggctataggtacagtgttagtaggacctacacctgtcaacataattggacgaaatatgttgactcaactcggttgtactttaaattttccaattagtcctattgacactgtaccagtaacattaaagccaggaatggatggaccaaaggttaaacagtggccattaacagaaraaaaaataaaagcatta…
302605_2016_AE	cctcaaatcactctttggcaacgaccccttgtcacagtaaaaataggaggacagctgaaagaagctctattagatacaggagcagatgatacagtactagaagatatagatttgccaggaaaatggaaaccaaaaatgatagggggaattggrggttttatcaaagtaaggcaatatgatcagattctyatagaaatttgtggaaaaagggctataggtacagtgttagtaggacctacacctgtcaacataattggacgaaatatgttgactcagattggctgtactttaaatttcccaattagtrctrttgacactgtaccmgtaacmttaaagccaggaatggatgggccaaaagttaaacagtggccmttwacagaagagaaaataaaagcatta…
302644_2016_AE	cctcaaatcactctttggcaacgacccgttgtcacagtaagaatagaaggacagctaaaagaagctctactagatacaggggcagatgatacagtattagaagatataaatttgccaggaaaatggaaaccaaaaatgatagggggaattggaggttttatcaaagtaaggcaatatgatcagatacttatagaaatttgtggaaaacaggctagaggtacagtgttagtaggacctacacctgtcaacataattggacgaaatatgttgactcagattggttgtactttaaattttccaattagtcctgttgacactgtaccagtaacattaaagccaggaatggatggaccaaaggtcaaacaatggccattgacagaagaaaaaataaaagcacta…
032934_2016_AE	~~~~~~~~~~~~~~~TGGCAACGACCCGTTGTCMCAGTAARARTAGAAGGACAGCTGAGAGAAGCYCTATTAGATACAGGGGCAGATGATACAGTATTAGAAGATATAAATTTGCCAGGAAAATGGAAACCRAAAATGATAGGRGGAATTGGAGGTTTTATCAAAGTAAGGCAATATGATCAGATMCTTATAGAAATTTGKGGMAAACAKGCTAKAGGTACAGTGTTAGTAGGACCTACACCTGTCAACATAATTGGACGAAATATGTTGACTCAGATTGGTTGTACTTTAAATTTTCCAATTAGTCCTGTTGACACTGTACCAGTMACATTAAAGCCAGGAATGRATGGACCAAAGGTCAAACAGTGGCCRTTGACAGAAGAAAAAATAAAAGCACTA…
302661_2016_AE	cctcaaatcactctttggcaacgacccgttgtcacaataaaaatagaaggacagctaagagaagctctattagatacaggagcagatgatacagtattagaagatataaatttgccaggaaaatggaaaccaaaaatgatagggggaattggaggttttatcaaagtaaggcaatatgatcagatacttatagaaatttgtggaaaaaaggctataggtacagtgttagtaggacctacacctgtcaacataattggacgaaatatgttgactcagcttggttgtactttaaattttccaattagtyctattgacactgtaccagtaaagttaaaaccaggaatggatggaccaaaggttaaacagtggccattgacagaagaaaaaataaaagcatta…
041908_2016_AE	~~~~~~~~~~~~~~~TGGCAACGACCCCTTGTCACAGTAAAAGTAGGAGGACAAATGAAAGAAGCTCTATTAGATACAGGAGCAGATGATACAGTATTAGAAGATATAAATTTGCCAGGAAAATGGAAACCAAAAATGATAGGGGGAATTGGAGGTTTTATCAARGTAARGCAATATGATCAGATACTTATAGAAATTTGTGGAAAAAAGGCTATAGGTACAGTATTAGTAGGACCTACACCTRTCAACATAATTGGACGAAATATGTTGACTCAAATTGGTTGYACTTTAAATTTCCCCATTAGTCCTRTTGAMACTGTACCAGTAAAATTAAAGCCAGGAATGGATGGACCAAAGGTTAAACAGTGGCCATTGACAGAAGAAAAAATAAAAGCATTA…
041917_2016_AE	~~~~~~~~~~~~~~~TGGCAACGACCTGTTGTCACAGTAARAATAGRAGGACAGCTGAAAGAAGCGCTRTTAGACACAGGAGCAGATGATACAGTATTAGAAGATATAAATTTGCCAGGAAAATGGAAACCAAAAATGATAGGGGGAATTGGAGGTTTTATCAAAGTAAGACAATATGATCAGATACTTATAGAAATTTGTGGAAAAAGGGCTATAGGTACAGTGTTAGTAGGGCCTACGCCTGTCAACATAATTGGACGAAATATGTTGACTCAGATTGGYTGTACTTTAAATTTYCCAATTAGTCCTATTGACACTGTACCAGTAAAATTAAAGCCAGGAATGGATGGACCAAAGGTTAAACARTGGCCATTGACAGAAGARAAAATAAAAGCATTA…
302693_2016_AE	cctcaaatcactctttggcaacgaccccttgtcacaataaaaataggaggacagctaagagaagctctattagatacaggagcagatgatacagtattagaagatataaatttgccaggaaaatggaagccaaaaatgatagggggaattggaggttttatcaaggtaaggcaatatgatcagatacttatagaaatttgtggaaaaarggctayaggtacagtattagtaggacctacacctgtcaacataattggacgaaatatgttgactcagcttggttgtactttaaacttcccaattagtcctattgacactgtaccagtaacattaaagccaggaatggatggaccaaaggttaaacagtggccattgacagaagaaaaaataaaagcatta…
302673_2016_AE	cctcaaatcactctttggcaacgacccctagtcacaataaaaataggaggacagcaaagagaagctctattagatacaggagcagatgatacagtattagaagatataaatttgccaggaaaatggaaaccaaaaatgatagggggaattggaggttttatcaaagtaaggcaatatgatcagatacctatagaaatttgtggaaagagggctataggtacagtgttagtaggacctacacctatcaacataattggacgaaatatgttgactcagcttggttgtactttaaatttcccaataagtcctattgacactgtaccagtaacattaaagccaggaatggatggaccaagggttaaacagtggccattgacagaagaaaaaataaaagcatta…
050301_2016_AE	~~~~~~~~~~~~~~~TGGCAACGACCCCTTGTCACAATAAAAATAGGGGGACAACTAAGAGAAGCTCTATTAGATACAGGAGCAGATGATACAGTATTAGAAGATATAGATTTGCCAGGAAAATGGAAACCAAAAATGATAGGGGGAATTGGAGGTTTTATYAAGGTAAGGCAATATGATCAGATACCTATAGAAATTTGTGGAAAAAAGGCTATAGGTACAGTRTTAATAGGACCTACACCTGTCAACATAATTGGACGAAATATGTTGACTCAGCTTGGTTGTACTTTAAATTTCCCAATTAGTCCTATTGACACTGTACCAGTAAMATTAAAGCCAGGAATGGATGGACCAAAGGTTAAACAGTGGCCATTGACAGAAGAAAAAATAAAAGCATTA…
302719_2016_AE	cctcaaatcactctttggcaacgacccctcgtcacagtaaaagtaggaggacaggtgagagaagctctattagatacaggagcggatgatacagtgttagaagatataaatttaccaggaaaatggaaaccaaaaatgatagggggaattggaggytttatcaaagtaaggcaatatgatcagatacttatagaaatttgtgraaaaagggctataggtacagtgttggtaggacctacacctgtcaacataattggacgaaatrtgttgactcaacttggytgcactttaaattttccaattagtcctattaacactgtaccagtaacattaaagccaggaatggatggaccaaaggttaaacagtggccattgacagaagaaaaaataaaagcatta…
051008_2016_AE	~~~~~~~~~~~~~~~TGGCAACGACCCCTAGTCACAATAAAAATAGGAGGAGAGCTAAGAGAAGCTCTATTAGATACAGGAGCAGATGATACAGTATTAGAAGATATAAATTTGCCAGGAAAATGGAAACCAAAAATGATAGGGGGAATTGGAGGTTTTATCAAGGTAAGACAATATGATCAGATACCTTTAGAAATTTGTGGAAAAAGGGCTATAGGAACAGTGTTAGTAGGACCTACACCTGTCAACATAATTGGACGAAATATGTTGACTCAGCTTGGTTGTACTTTAAATTTCCCAATTAGTCCTATTGACACTGTACCAGTAACACTAAAGCCAGGAATGGATGGACCAAAGGTTAAACAATGGCCATTAACAGAAGAAAAAATAAAAGCATTA…
051015_2016_AE	~~~~~~~~~~~~~~~TGGCAACGACCCCTTGTCACAGTAAAAGTAGGAGGACAGATGAAAGAAGCTCTATTAGATACAGGAGCAGATGATACAGTATTAGAAGATATAAATTTGCCAGGAAAATGGAAACCAAAAATGATAGGGGGAATTGGAGGTTTTATCAAGGTAAGGCAATATGATCAGATACTTATAGAAATTTGTGGAAAAAGGGCTATAGGTTCAGTGTTAGTAGGGCCTACACCTGTCAACATAATTGGACGAAATATGTTGACTCAGCTTGGTTGTACTYTAAATTTCCCAATTAGTCCTATTGACACTGTACCAGTAACAYTAAAGCCAGGAATGGATGGACCAAAGGTKAAACAGTGGCCATTAACAGAAGAAAAAATAAAAGCATTA…
051716_2016_AE	~~~~~~~~~~~~~~~TGGCAGCGACCCCTTGTCACAATAAAAATAGAAGGACAGCTAAGAGAAGCTCTATTAGATACAGGAGCAGATGATACAGTATTAGAAGATATAAATTTGCCAGGAAAATGGAAACCAAAAATGATAGGGGGAATTGGAGGTTTTATCAAAGTAAGGCAATATGATCAGATACTTATAGAAATTTGTGGGAAAAAAGCTGTAGGTACAGTATTAGTAGGACCTACACCTGTCAACATAATTGGACGAAACATGTTGACTCAGCTTGGTTGTACTTTAAATTTCCCAATTAGTCCTATTGACACTGTACCAGTAAAATTAAAACCAGGAATGGATGGACCAAAGGTTAAACAGTGGCCATTGACAGAAGAAAAAATAAAAGCATTA…
051720_2016_AE	~~~~~~~~~~~~~~~TGGCAACGACCCCTTGTCACAGTAAAAGTAGGAGGACAGTTGAGAGAAGCTCTATTAGATACAGGAGCAGATGATACAGTATTAGAAGATATAAATTTGCCAGGAAAATGGAAACCAAAAATGATAGGGGGAATTGGAGGTTTTATCAAAGTAAGACAATATGATCAGATACTTATAGAAATTTGTGGAAAAAGGGCTATAGGTACAGTATTAGTAGGACCTACACCTGTCAACATAATTGGACGAAATATGTTGACTCAACTCGGTTGTACTTTAAATTTTCCAATTAGTCCTATTGACACTGTACCAGTAACATTAAAGCCAGGAATGGATGGACCAAAGGTTAAACAGTGGCCATTAACAGAAGAAAAAATAAAAGCATTA…
302716_2016_AE	cctcaaatcactctttggcaacgaccccttgtcacagtaaaaataggaggacagctgaaagaagctctattagatacaggagcagatgatacagtactagaagatatagatttgccaggaaaatggaaaccaaaaatgatagggggaattggaggttttatcaaagtaaggcaatatgatcagattcttatagaaatttgtggaaaaagggctataggtacagtgttagtaggacctacacctgtcaacataattggacgaaatatgttgactcagattggctgtactttaaatttcccaattagtcctattgaccctgtaccagtaacattaaagccaggaatggatgggccaaaagttaaacagtggccattaacagaagagaaaataaaagcatta…
060706_2016_AE	~~~~~~~~~~~~~~~TGGCAACGACCCCTTGTCACAATAAAAATAGGRGGACAGCTGARAGAAGCTCTATTAGATACAGGAGCAGATGATACRGTATTRGAAGATATAAATTTGCCAGGAAAATGGAAACCAAAAATGATAGGGGGAATTGGGGGTTTTATCAAAGTAAGGCAATATGATCAGATACSTATAGAAATTTGTGGAAAACAGGCTRTRGGWACAGTGTTAGTAGGACCTACACCTGTCAACATAATTGGACGAAATATGTTRACTCAGCTTGGGTGTACKTTAAATTTTCCAATTAGTCCTATTGACACTGTACCAGTAACATTAAAGCCAGGAATGGATGGRCCAAAGGTTAAACAGTGGCCATTGACAGAAGAAAAAATAAAAGCATTA…
060721_2016_AE	~~~~~~~~~~~~~~~TGGCAACGACCCCTTGTCACAATAAAAATAGGAGGACAGCTGAAGGAAGCTCTATTAGATACAGGAGCAGATGATACAGTATTAGAAGAYATAAATTTGCCAGGAAAATGGAAACCAAAAATGATAGGGGGAATTGGAGGTTTTATCAAAGTAAGRCAATATGATCAGATACAGATAGAAATTTGTGGAAAAAAGGCTATAGGTACAGTGTTAGTAGGRCCTACACCTRTCAACATAATTGGACGMAATATGTTGACTCAGATTGGTTGTACTTTAAATTTTCCAATTAGTCCTATTGACACTGTACCAGTAACATTAAAGCCAGGAATGGATGGACCAAAGGTTAAACAGTGGCCATTGACAGAAGAAAAAATAAAAGCATTA…
060723_2016_AE	~~~~~~~~~~~~~~~TGGCAACGACCCCTTGTCACAATAAAAATAGGAGGACARCTAAGAGAAGCTCTATTAGATACAGGAGCAGATGATACAGTATTAGAAGATATAAATTTGCCAGGAAAATGGAAACCAAAAATGATAGGGGGAATTGGAGGTTTTATCAAAGTAAGGCAATATGATCAGATACCTATAGMAATTTGTGGAAAAARGGCTATAGGTACRGTGTTARTAGGACCTACACCTGTCAACATAATTGGACGAAATMTGTTGACTCAGCTTGGGTGTACTYTAAATTTCCCAATTAGTCCTATTGACACTGTACCAGTAACRTTAAAGCCAGGAATGGATGGRCCAAAGGTTAAACAGTGGCCATTGACAGAAGAAAAAATAAAAGCATTA…
062103_2016_AE	cctcaaatcactctttggcaacgaccccttgtcacaataaaaataggaggacagctaagagaagctctattagatacaggagcagatgatacagtattagaagatataaatttaccaggaaaatggaaaccaaaaatgatagggggaattggaggttttatcaaggtaaggcaatatgatcagatacctatagaaatttgtggacagaaggctataggtacagtgttagtaggacctacacctgtcaacataattggacgaaatatgttgacccagattgggtgtactttaaatttcccaattagtcctattgacactgtaccagtaacattaaagccaggaatggatggaccaaaggttaaacagtggccattgacagaagaaaaaataaaagcatta…
070502_2016_AE	~~~~~~~~~~~~~~~TGGCARCGACCCCTCGTCACAGTAARARTAGGGGGGCAAMTGAGAGAAGCTCTATTAGATACAGGAGCAGATGATACAGTATTAGAAGATATAAATTTGCCAGGAARATGGAAACCAAAAATGATAGGGGGAATTGGAGGTTTTATCAAAGTAAGACAATATGAACAGGTACTTATAGAAATTTGTGGAAAAAAGGCTATAGGTACAGTGTTAGTAGGACCTACACCTGTCAACATAATTGGACGAAATATGTTGACTCAGATTGGTTGTACTTTAAATTTCCCAATTAGTCCTATTGAYACTGTACCAGTAAAATTAAAGCCAGGAATGGATGGACCAAAGGTTAAACAGTGGCCATTGACAGAAGAAAAAATAAAAGCATTA…
071206_2016_AE	~~~~~~~~~~~~~~~TGGCAGCGACCCCTTGTCACAATAAAAATTGGGGGACAACTAAAAGAAGCTCTATTAGATACAGGAGCAGATGATACAGTATTAGAAGATATAAATTTGCCAGGAAAATGGAAACCAAAAATGATAGGGGGAATTGGAGGTTTTATCAAGGTAARGCAATATGATCAAATACTTATAGAAATTTGTGGRAAAAAGGCTATAGGTACAGTACTAGTAGGACCTACACCTGTYAACATAATTGGACGAAATATGTTGACTCAAATTGGTTGTACTTTAAATTTYCCCATTAGTCCTATTGACACTGTACCAGTAAAATTAAAGCCAGGAATGGATGGACCAAAGGTTAAACARTGGCCATTGACAGAAGAAAAAATAAAAGCATTA…
071803_2016_AE	~~~~~~~~~~~~~~~TGGCAACGACCCCTTGTCACAGTAAAAATAGGAGGACAGATGAAAGAAGCTCTATTAGATACAGGAGCAGATGATACAGTATTAGAAGAGATAAATTTGCCAGGGAAATGGAAACCAAAAATGATAGGGGGAATTGGAGGTTTTATCAAAGTAAGGCAATATGATCAGATACTTATAGAAATTTGTGGGAAAAAAGCTATAGGTACAGTGCTAGTAGGACCTACACCTGTCAACATAATTGGACGAAATATGTTGACTCAAATTGGTTGCACTTTAAATTTCCCAATTAGCCCTATTGACACTGTACCAGTAACATTAAAGCCAGGAATGGATGGACCAAAAGTTAAACAGTGGCCATTGACAGAAGAAAAAATAAAAGCATTA…
302816_2016_AE	cctcaaatcactctttggcaacgacccctcgtcacaataaaaataggaggacagctgaaagaggctctattagatacaggagcagatgatacagtgttagaagaaataaatttaccaggaaaatggaaaccaaaaatgatagggggaattggaggttttatyaaagtaaggcaatatgatcagatacctatagaaatttgtggaaaaagggctataggtacagtgttagtaggacctacacctgtcaacataattggacgaaatatgttgactcagattggttgtactttaaattttccaattagtcctattgacactgtaccagtaagattaaagccaggaatggatgggccaaaggttaaacagtggccattgacagaagaaaaaataaaagcatta…
072601_2016_AE	~~~~~~~~~~~~~~~TGGCAACGACCCCTTGTCACAGTAAAAATAGAAGGACAGCTAAGAGAAGCTCTATTAGATACAGGAGCAGATGATACAGTATTAGAAGATATAGATTTGCCAGGAAAATGGAAACCAAAAATGATAGGGGGAATTGGAGGTTTTATCAAAGTAAGGCAATATGATCAGATACCTATAGAAATTTGYGGAAAAAGGGCTATAGGTACAGTATTAGTAGGACCTACACCTGTCAACATAATTGGACGAAATATGTTGACTCAGCTTGGCTGTACTTTAAATTTCCCAATTAGTCCTATTGACACTGTACCAGTAACATTAAAGCCAGGAATGGATGGACCAAAAGTTAAACAGTGGCCATTGACAGAAGAAAAAATAAAAGCATTA…
072619_2016_AE	~~~~~~~~~~~~~~~TGGCAACGACCCCTTGTCACAATAAAAATAGGAGGACAGCTAAGAGAAGCTCTATTAGATACAGGAGCAGATGATACAGTATTAGAAGATATAAATTTGCCAGGAAAATGGAAACCAAAAATGATAGGGGGAATTGGAGGTTTTATCAAAGTAAGGCAATATGATcAGATACCTATAGAAATTTgTGGAAAGARGGCTATAGGTACAGTGTTAGTAGGACCTACACCTRTCAACATAATTGGACGAAACATGTTGACTCAGCTTGGTTGTACTTTAAATTTCCCAATTAGTCCTATTGACACTGTACCAGTAACATTAAAGCCAGGAATGGATGGRCCAAAGGTTAAACAGTGGCCATTGACAGAAGAAAAAATAAAAGCATTA…
080219_2016_AE	~~~~~~~~~~~~~~~TGGCAACGACCCGTTGTCACAGTAAAAATAGGRGGRCAGCTGAAAGAAGCGCTATTAGACACAGGAGCAGATGATACAGTATTAGAAGATATAAATTTGCCAGGAAAATGGAAACCAAAAATGATAGGGGGAATTGGAGGTTTTATCAAAGTAAGACAATATGATCAGATACTTATAGAAATTTGTGGAAAAAGGGCTATAGGTACAGTGTTAGTAGGRCCTACGCCTRTCAACATAATTGGACGAAATATGTTGACTCAGATTGGTTGTACTTTAAATTTTCCAATTAGTCCTATTGACACTGTACCAGTAAAATTAAAGCCAGGAATGGATGGACCAAAGGTTAAACAGTGGCCATTGACAGAAGAAAAAATAAAAGCATTA…
080907_2016_AE	cctcaaatcactctttggcaacgaccccttgtcacaataaaaatagggggacaactaaragaagctctattagatacaggagcagatgatacagtattagaagatataaatttgccaggaaaatggaaaccaaaaatgatagggggaattggaggttttatcaargtaaggcaatatgatcagatacctatagaaatttgtggaaaaaaggctataggtacagtrttagtaggacctacgcctgtcaatataattggacgaaatatgttgactcaamttggttgtactttaaatttccccattagtcctattgacactgtaccagtaaaattaaagccaggaatggatggaccaaaggttaaacagtggccattgacagaagaaaaaataaaagcatta…
080922_2016_AE	CCTCAAATCACTCTTTGGCAACGACCCGTTGTCACAGTGAGAATAGAAGGACAGCTGAAAGAAGCCCTATTAGATACAGGGGCAGATGATACAGTATTAGAAGATATAAATTTGCCAGGAAAATGGAAACCAAAAATGATAGGGGGAATTGGAGGTTTTATCAAAGTAAGGCAATATGATCAGATACTTATAGAAATTTGTGGAAAACAGGCTATAGGTACAGTGTTAGTAGGACCTACACCTGTCAACATAATTGGACGAAATATGTTGACTCAGATTGGTTGTACTTTAAATTTTCCAATTAGTCCTGTTGACACTGTACCAGTAACATTAAAGCCAGGAATGGATGGACCAAAGGTCAAACAGTGGCCATTGACAGAAGAAAAAATAAAAGCACTA…
080924_2016_AE	~~~~~~~~~~~~~~~TGGCAGCGACCCCTTGTCACAATAARAATAGAAGGACAGCTAAGAGAAGCTCTATTAGATACAGGAGCAGATGATACAGTATTAGAAGATATARATTTGCCAGGAAAATGGAAACCAAAAATGATAGGGGGAATTGGAGGTTTTATCAAAGTMAGGCAATATGATCAGATACTTATAGAAATTTGTGGAAAAAAGGCTGTAGGTACAGTATTAGTAGGACCTACACCTGTCAACATAATTGGACGAAACATGTTGACTCAGCTWGGTTGTACTTTAAATTTCCCAATTAGTCCTATTGACACTGTACCAGTAAAATTAAAGCCAGGAATGGATGGACCAAAGGTTAAACARTGGCCATTGACAGAAGAAAAAATAAAAGCATTA…
081603_2016_AE	~~~~~~~~~~~~~~~TGGCAACGACCCCTTGTCACAATAAAAATAGGAGGACAGCTGAAAGAAGCTCTATTAGATACAGGAGCAGATGATACAGTACTGGAAGATATAAATTTGCCAGGAAAATGGAAACCAAAAATGATAGGGGGAATTGGAGGTTTTATCAAGGTAAGGCAATATGATCAGATACTGATAGAAATTTGTGGAAAAAAGGCTWTAGGTACAGTGTTAGTAGGACCTACACCTGTCAACATAATTGGACGAAATATGTTGACTCAGATTGGTTGTACTTTAAATTTCCCAATTAGCCCTATTGACACTGTACCAGTAACATTAAAACCAGGAATGGATGGACCAAGGGTTAAACAGTGGCCATTAACAAAAGAAAAAATAGAAGCATTA…
083017_2016_AE	~~~~~~~~~~~~~~~TGGCAACGACCCCTTGTCACARTAAAAATAGGAGGACAGATGAAAGAAGCTCTATTAGATACAGGAGCAGATGATACAGTATTAGAAGAGATAAATTTGCCAGGGAAATGGAAACCAAAAATGATAGGGGGAATTGGAGGTTTTATCAAAGTAAGGCAATATGATCAGATACTTATAGAAATTTGTGGGAAAAAAGCTATAGGTACAGTGCTAGTAGGACCTACACCTGTCAACATAATTGGACGAAATATGTTGACTCAAWTTGGTTGCACTTTAAATTTCCCAATTAGCCCTATTGACACTGTACCAGTAACATTAAAGCCAGGAATGGATGGACCAAAAGTTAAACAGTGGCCATTGACAGAAGAAAAAATAAAAGCATTA…
091309_2016_AE	~~~~~~~~~~~~~~~TGGCAGCGACCCCTTGTCACAATAAAAATAGGAGGACAGCTAAGAGAAGCTCTATTAGATACAGGAGCAGATGATACAGTATTAGAAGATATAAATTTGCCAGGAAAATGGAAACCAAAAATGATAGGGGGAATTGGAGGTTTTATCAAGGTAAGGCAATATGATCAGATACCTATAGAAATTTGTGGAAAAAGGGCTATAGGTACAGTGTTAGTAGGACCTACACCTGTCAACATAATTGGACGAAATATGTTGACTCAGCTTGGTTGTACTTTAAATTTCCCAATTAGTCCTATTGACACTGTACCAGTAACATTAAAGCCAGGAATGGATGGGCCAAAGGTTAAACAGTGGCCATTGACAGAAGAAAAAATAAAAGCATTA…
101108_2016_AE	~~~~~~~~~~~~~~~TGGCAACGACCCCTTGTCACAGTAAAAATAGAAGGACAGCTGAAAGAAGCTCTATTAGACACAGGAGCAGATGATACAGTATTCGAAGATATAAATTTGCCAGGAAAATGGAAACCAAAAATGATAGGGGGAATTGGAGGTTTTATCAAGGTAAGGCAATATGATCAGATACTTATAGAAATTTGTGRAAAAAGGGCTATAGGTACAGTATTAGTAGGACCTACACCTGTCAACATAATTGGACGAAATATGTTGACTCAGGTTGGTTGTACTTTAAATTTCCCAATTAGTCCTATTGACACTGTACCAGTAACATTAAAGCCAGGAATGGATGGACCAAAGGTTAAACAGTGGCCATTAACAGAAGAAAAAATAAAAGCATTA…
101120_2016_AE	~~~~~~~~~~~~~~~TGGCAACGACCCCTTGTCACAGTAAAAATAGGAGGACAGTTGATAGAAGCTCTATTAGATACAGGAGCAGATGATACAGTATTAGAAGATATAAATTTGCCAGGAAAATGGAAACCAAAAATGATAGGGGGAATTGGAGGCTTTATCAAAGTAAGRCAATATGATCAGATACTTCTAGAAATTTGTGGAAAAAGGGCTATAGGTACAGTGTTAGTAGGACCTACACCTGTCAACATAATTGGACGAAATATGTTGACTCAGATTGGTTGTACTTTAAATTTTCCAATTAGTCCTATTGACACTGTACCAGTAACATTAAAGCCAGGAATGGATGGACCAAAGGTTAAACAGTGGCCATTGACAGAAGAAAAAATAAAAGCATTA…
302916_2016_AE	cctcaaatcactctttggcaacgaccccttgtcacagtaaaaataggaggacagttgagagaagctctactagatacaggagcagatgatacagtattagaagatataaatttgccaggaaaatggaaaccaaaaatgatagggggaattggaggttttatyaaagtaaggcaatatgatcagatacttatagaaatttgtggaaaaaaggctataggtacagtgttggtaggacctacacctgtcaacataattggacgaaatatgttgactcagcttggttgtactttaaatttcccaattagtcctattgacactgtaccagtaacattaaagccaggaatggayggaccaaaggttaaacagtggccattracagaagaaaaaataaaagcatta…
101808_2016_AE	~~~~~~~~~~~~~~~TGGCAACGACCCYTAGTCACAATAAAAATAGGRGGASAGCTAAGAGAAGCTCTATTAGATACAGGAGCAGATGATACAGTATTAGAAGATATAAATTTGCCAGGAAAATGGAAACCAAAAATGATAGGGGGAATTGGAGGTTTTATCAAAGTAAGGCAATATGATSAGATACCTATAGAAATTTGTGGAAARARGGCTATAGGTACAGTGTTAGTAGGACCYACACCTATCAACATAATTGGACGAAATATGTTGACTCAGCTTGGTTGTACTTTAAATTTCCCAATTAGTCCTATTGACACTGTACCAGTAACATTAAAGCCAGGAATGGATGGWCCAAARGTTAAACAGTGGCCATTGACAGAAGAAAAAATAAAAGCWTTA…
101813_2016_AE	CCTCAAATCACTCTTTGGCAACGACCYCTTGTCCCAGTAAAAATAGAAGGACAGCTGAAAGAAGCTCTATTAGATACAGGAGCAGATGATACAGTATTAGAAGATATAAATTTGCCAGGGAAATGGAAACCAAAAATGATAGGGGGAATTGGAGGTTTTATCAAAGTAAGGCAATATGATCAGATACCTATAGAAATTTGTGGAAAAAAGGCTRTAGGTACAGTGTTAGTAGGACCTACACCTGTCAACATAATTGGRCGAAATATGTTGACTCAGCTTGGTTGTACRTTAAATTTCCCAATTAGTCCTRTTGACACTGTACCAGTTACATTAAAGCCAGGAATGGATGGACCAAAGGTTAAACARTGGCCATTGACAGAAGAAAAAATAAAAGCATTA…
101818_2016_AE	~~~~~~~~~~~~~~~TGGCAGCGACCCCTTGTCACAATAAAAATAGAAGGACAGCTAAGAGAAGCTTTATTAGATACAGGAGCAGATGATACAGTATTAGAAGAGATAAATTTGCCAGGAAAATGGAAACCAAAAATGATAGGGGGAATTGGAGGTTTTATCAAAGTAAGGCAATATGATCAGATACTTATAGAAATCTGTGGAAAAAAGGCTRTAGGTACAGTGTTRGTAGGACCTACACCTGTCAACATAATTGGACGAAATATGTTGACTCAGCTTGGTTGTACATTAAATTTTCCAATTAGTCCTATTGACACTGTACCAGTAAMATTAAAGCCAGGAATGGATGGACCAAAAGTTAAACAGTGGCCATTAACAGAAGAAAAAATAAAAGCATTA…
110108_2016_AE	~~~~~~~~~~~~~~~TGGCAACGACCCCTCGTCACAATAAAAATAGGAGGACAGMTGAAAGAAGCTCTATTAGATACAGGGGCAGATGATACAGTGTTAGAAGATATAAATTTACCAGGAAAATGGAAACCAAAAATGATAGGGGGAATTGGAGGTTTTATCAAAGTAAGGCAATATGATCAGRTATCTATAGAAATCTGTGGAAAAARGGCTATAGGTACAGTGTTAGTAGGACCTACACCTGTCAACATAATTGGACGAAATATGTTGACTCAGATTGGYTGTACTTTAAATTTTCCAATTAGTCCTATTGACACTGTGCCAGTAACATTAAAGCCAGGAATGGATGGGCCAAAGGTTAAACAGTGGCCATTGACAGAAGAAAAAATAAAAGCATTA…
110116_2016_AE	~~~~~~~~~~~~~~~TGGCAACGACCCCTTGTCACAGTAAAAGTAGGAGGACARTTGAGAGAAGCTCTACTAGACACAGGAGCAGATGATACAGTATTAGAAGATATAAATTTGCCAGGAAAATGGAAACCAAAAATGATAGGGGGAATTGGAGGTTTTATCAAAGTAAGGCAATATGATCAGATACTTATAGAAATTTGTGGAAAAAAGGCTATAGGTACAGTGTTGGTAGGACCTACACCTGTCAACATAATTGGACGAAATATGTTGACTCAGTTTGGTTGTACTTTAAATTTCCCAATTAGTCCTATTGACACTGTACCAGTAACATTAAAGCCAGGAATGGATGGACCAAAGGTTAAACAGTGGCCATTRACAGAAGAAAAAATAAAAGCACTA…
110120_2016_AE	~~~~~~~~~~~~~~~TGGCAACGACCAGTTGTCACAGTRAAAATAGAAGGACAGCTGAGAGAAGCTCTATTAGATACAGGAGCAGATGATACAGTAGTAGAAGATATAAATTTGCCAGGAAAATGGAAACCAAAAATGATAGGGGGAATTGGAGGTTTTATCAAAGTAAGGCAATATGATCARGTACWTATAGAAATWTGTGGAAAAAAGGCTATAGGTACAGTATTAGTAGGACCTACACCTGTCAACATAATTGGACGAAATATGTTGACTCAGATTGGTTGYACTTTAAATTTYCCAATTAGTCCTATTGAGACTGTACCAGTACAATTAAAGCCAGGAATGGATGGRCCAAAGGTTAAACAGTGGCCATTGACAGAAGAAAAAATAAAAGCATTA…
110122_2016_AE	~~~~~~~~~~~~~~~TGGCARCGACCCCTAGTCACAATAAAAATAGGGGGACAGCTAAGAGAAGCTCTATTAGATACAGGAGCAGATGATACAGTATTAGAAGATATAAATTTGCCAGGAAAATGGAAACCAAAAATGATAGGGGGAATTGGGGGTTTTATCAAAGTAAGGCAATATGATCAGATACCTATAGAAATTTGTGGAAAGAAAGCTATAGGYACAGTGTTAGTAGGACCTACACCTATCAACATAATTGGACGAAATATGTTGACTCAACTTGGTTGTACTTTAAATTTCCCAATTAGTCMTATTGACACTGTACCAGTAAAATTAAAGCCAGGAATGGATGGTCCAAAGGTTAAACAGTGGCCATTGACAGAAGAAAAAATAAAAGCMTTA…
111513_2016_AE	CCTCAAATCACTCTTTGGCAGCGACCCCTTGTCACAATAAAAATAGGAGGACAGTTAAGAGAAGCTCTACTAGATACAGGAGCAGATGATACAGTATTAGAAGATATAGATTTACCAGGAAGATGGAAACCAAAAATGATAGGGGGAATTGGAGGTTTTATCAAAGTAAGGCAATATGATCAGATACAKATGGAAATTTGTGGAAAAAAGGCTATGGGTACAGTGTTGGTAGGACCTACACCTGTCAACATAATTGGACGAAATATGTTGACTCARCTTGGTTGTACTTTAAATTTCCCAATTAGTCCTATTGACACTGTACCAGTAACATTAAAGCCAGGAATGGATGGACCAAAGGTTAAACAGTGGCCATTGACAGAAGAAAAAATAAAAGCATTA…
112214_2016_AE	~~~~~~~~~~~~~~~TGGCAACGACCCCTTGTCACAGTAAAAATAGGGGGACAACTAAAAGAAGCTCTATTAGATACAGGAGCAGATGATACAGTATTAGAAGATATAAATTTGCCAGGAAAATGGAAACCAAAAATGATAGGGGGAATTGGAGGTTTTATCAAGGTAAARCAATATGATCAGATACTTATAGAAATTTGTGGGAAAAAGGCTATAGGTACAGTATTAGTAGGACCTACACCTGTCAATATAATTGGACGAAATATGTTGACTCAAATTGGTTGTACTTTAAATTTCCCCATTAGTCCTATTGACACTGTACCAGTAAAATTAAAGCCAGGAATGGATGGGCCAAAGGTTAGACARTGGCCATTGACAGAAGAAAAAATAAAAGCATTA…
120604_2016_AE	~~~~~~~~~~~~~~~TGGCAACGACCCCTTGTCACAATAAGAATAGGAGGAGAGCTAAGAGAAGCTCTATTAGATACAGGAGCAGATGATACAGTATTAGAAGATATAAATTTGCCAGGAAAATGGAAACCAAAAATGATAGGGGGAATTGGAGGTTTTATCAAAGTAAGACAATATGATCAGATAGCTATAGAAATTTGTGGAAAAAGGGCTGTAGGCACAGTGTTAGTAGGACCTACACCTGTCAACATAATTGGGCGAAATATGTTGACTCAGCTTGGTTGTACTTTAAATTTCCCAATTAGTCCTATTGACACTGTACCAGTAACATTAAAGCCAGGAATGGATGGACCAAAGGTTAAACAGTGGCCATTGACAGAAGAAAAAATAAAAGCATTA…
120614_2016_AE	~~~~~~~~~~~~~~~TGGCAACGACCCCTTGTCACAATAAAAATAGGAGGAGAGCTAAGAGAGGCTCTATTAGATACAGGAGCAGATGATACAGTATTAGAAGATATAAATTTGCCAGGAAAATGGAAACCAAAAATGATAGGGGGAATTGGAGGTTTTATCAAAGTAAGGCAATATGATCAGATACCTATAGAAATTTGTGGAAAAAGGGCTATAGGTACAGTGTTAGTAGGACCTACACCTGTCAACATAATTGGACGAAATATGTTGACTCAGCTTGGTTGTACTTTAAATTTCCCAATTAGTCCTATTGAAACTGTACCAGTAAAATTAAAGCCAGGAATGGATGGACCAAAGGTTAAACAGTGGCCATTGACAGAAGAAAAAATAAAAGCATTA…
121312_2016_AE	~~~~~~~~~~~~~~~TGGCAACGACCCCTTGTCACAATAAAAATAGAAGGACAACTAAAAGAAGCTCTATTAGATACAGGAGCAGATGATACAGTATTAGAAGATATAAATTTGCCAGGAAAATGGAAACCAAAAATGATAGGGGGAATTGGAGGTTTTATTAAAGTAAGGCAATATGACCAGATACTTATAGAAATTTGTGGAAAAAAGGCYATAGGTACAGTGTTAGTAGGACCTACACCTGTCAACATAATTGGACGAAATATGTTGACTCAGCTTGGTTGTACTTTAAATTTTCCAATTAGTCCTATTGACACTGTACCAGTAACATTAAAGCCAGGRATGGATGGACCAAAGGTTAAACAGTGGCCATTGACAGAAGAAAAAATAAAAGCATTA…
121324_2016_AE	~~~~~~~~~~~~~~~TGGCAACGACCCCTTGTCACAATAAAAATAGAAGGACAGCTGAAAGAAGCTCTATTAGATACAGGAGCAGATGATACAGTATTAGAAGATATAAATTTGCCAGGAAAATGGAAACCAAAAATGATAGGGGGAATTGGAGGTTTTATCAAAGTAAGGCAATATGATCAGRTAYCTATAGAAATTTGTGGAAAAAGGGCTATAGGTACAGTGTTAGTAGGACCYACACCTGTCAACATAATTGGACGAAATATGYTGACTCAGATTGGTTGTACTTTAAATTTTCCAATTAGTCCTATTGACACTGTACCAGTAACATTAAAGCCAGGAATGGATGGACCAAAGGTTAAACAGTGGCCATTRACAGAAGAAAAAATAAAAGCATTA…
122006_2016_AE	~~~~~~~~~~~~~~~TGGCAACGACCCCTTGTCACAATAAAAATAGGAGGACAGCTGAAAGAAGCTCTATTAGATACAGGAGCAGATGATACAGTATTAGAAGATATAAATTTGCCAGGAAAATGGAAACCAAAAATGATAGGGGGAATTGGAGGTTTTATCAAGGTAAGGCAATATGATCAGATACTGATAGAAATTTGTGGAAAAAAGGCTATAGGTACAGTGTTAGTAGGACCTACACCTGTCAACATAATTGGACGAAATATGTTGACTCAGATTGGTTGTACTTTAAATTTCCCAATTAGCCCTATTGACACTGTRCCAGTAACATTAAAACCAGGAATGGATGGACCAAGGGTTAAACAATGGCCATTAACAAAAGAAAAAATAGAAGCATTA…
122706_2016_AE	~~~~~~~~~~~~~~~TGGCAACGACCCCTTGTCACAATAAAAATAGGGGGACARCTAAGAGAAGCTCTATTAGATACAGGAGCAGATGATACAGTATTAGAAGATATAAATTTACCAGGAAAATGGAAACCAAAAATGATAGGGGGAATYGGRGGTTTTATCAAGGTAARGCAATATGATCAGATACYTATAGAAATTTGTGGRAAAAAGGCTATRGGTACAGTATTAGTAGGACCTACACCTGTCAACATAATTGGACGAAAYATGTTGACTCARMTTGGTTGTACTTTAAATTTCCCMATTAGTCCTATTGACACTGTACCAGTAACATTAAAGCCAGGAATGGATGGACCAAAGGTTAAACAGTGGCCATTRACAGAAGAAAAAATAAAAGCATTA…
302530_2016_AE	cctcaaatcactctttggcaacgaccccttgtcacagtaaaagtaggaggacagctaaaagaagctctattagatacaggagcagatgatacagtattagaagatataaatttgccaggaaaatggaaaccaaaaatgatagggggaattggaggttttatcaaggtaaggcaatatgatcagataacyatagaaatttgtggaaaaarggctataggtacagtgttagtaggacctacacctgtcaacataattggacgaaatatgttgactcagattggttgtactttaaatttcccaattagtcctattgacactgtaccagtaacattaaagccaggaatggatggaccaaaggtcaaacagtggccattgacagaagaaaaaataaaagcatta…
302538_2016_AE	cctcaaatcactctttggcaacgaccccttgtcacagtaaaagtaggaggacagttgagagaagctctattagatacaggagcagatgatacagtattagaagatataaatttgccaggaaaatggaaaccaaaaatgatagggggaattggaggttttatcaaagtaaggcaatatgatcagatacttatagaaatttgtggaaaaaaggctataggtacagtgttagtaggacctacacctgtcaacataattggacgaaatatgttgactcaactcggttgtactttaaattttccaattagtcctattgacactgtaccagtaacattaaagccaggaatggatggaccaaaggttaaacagtggccattaacagaagaaaaaataaaagcatta…
302573_2016_AE	cctcaaatcactctttggcaacgacctgttgtcacagtaagaatagarggacagctgaaagaagctctattagatacaggggcagatgatacagtattagaagatataaatttgccaggaaaatggaaaccaaaaatgatagggggaattggaggttttatcaaagtaaggcaatatgatcagatacgtatagaaatttgtggaaaacaggctataggtacagtgttagtaggacctacacctgtcaacataattggacgaaatatgttgactcagattggttgtactttaaattttccaattagtcctgttgacactgtaccagtaacattaaagccaggaatggatggaccaaaggtcaaacartggccattgacagaagaaaaaataaaagcacta…
302588_2016_AE	cctcaaatcactctttggcaacgaccccttgtcacaataaaaataggagggcaactaagagaagctctattagatacaggagcagatgatacagtattagaagatataaatttgccaggaaaatggaaaccaaaaatgatagggggaattggaggttttatcaaggtaaggcaatatgatcagatacctatagaaatttgtggaaaaaaggctataggtacagtgttagtaggacctacacctgtcaacataattggacgaaayatgttgactcagcttggttgtactttaaatttcccaattagtcctattgacackgtaccagtaamattaaagccaggaatggatggaccaaaggttaaacagtggccattracagaagaaaaaataaaagcatta…
302592_2016_AE	cctcaaatcactctttggcaacgacccctcgtcacagtaaaaataggaggacagctgagggaagctctattagatacaggagcagatgatacagtattagaagatataaatttgccaggaaaatggaaaccaaaaatgatagggggaattggaggttttatcaaggtaaagcaatatgatcagatacttatagaaatttgtggaaaaaaggctataggtacagtattagtaggacctacacctatcaacataattggacgaaatatgttgactcagattggttgtactttaaatttcccaattagtcctattgacactgtaccagtaaaattaaagccaggaatggatggaccaaaggttaaacagtggccattaacagaagaaaaaataaaagcatta…
302600_2016_AE	CCTCAAATCACTCTTTGGCAGCGACCCCTTGTTACCATAAAAATAGGGGGACAGCTGAAAGAAGCTCTGTTAGACACAGGAGCAGATGATACAGTATTAGAAGATATAAATTTGCCAGGAAAATGGAAGCCAAAAATGATAGGGGGAATTGGAGGTTTTATCAAAGTAAGGCAATATGATCAGATACTTATAGAAATTTGTGGAAAAAAGGCTATAGGCACAGTATTAGTAGGACCTACACCTGTCAACATAATTGGACGAAATATGTTGACTCAGATTGGTTGTACTTTAAATTTCCCAATTAGTCCTATTGACACTGTACCAGTAACATTAAAGCCAGGAATGGATGGACCAAAGGTTAAACAGTGGCCATTGACAGAAGAAAAAATAAAAGCATTA…
302601_2016_AE	cctcaaatcactctttggcaacgaccccttgtcccaataaaartaggaggacagctgaragaagctctattagatacaggagcagatgatacagtgttagaagatataaatttaccaggaaaatggaaaccaaaaatgatagggggaattggaggttttatcaaggtaaggcaatatgatcaaatacttatagaaatttgtggaaaaaaggctataggtacagtgttagtaggacctacacctgtcaacataattggacgaaacatgttgactcagcttggttgtactttaaattttccaattagtcctattgaccctgtaccagtaacattaaagccaggaatggatgggccaaagrttaaacagtggccattgacagaagaaaaaataaaagcatta…
302610_2016_AE	cctcaaatcactctttggcagcgaccccttgtcacaataaaaatagaaggacagttgagagaagctcttttagatacaggagcagatgatacagtattagaagatataaatttgccaggaaaatggaaaccaaaaatgatagggggaattggaggttttatcaaagtaaggcagtatgatcagataccyatagaaatttgtggaaawaargctataggtacagtgttggtaggacctacacctgtcaacataattggamgaaatatgttgactcagcttggttgtactttaaatttyccaatyagtcccattgamactgtaccagtaacaytaaagccaggaatggatggrccaaaggttaaacartggccattgacaraagaaaaaataraagcatta…
302655_2016_AE	cctcaaatcactctttggcaacgaccccttgtcacaataaaaatagaaggacagctaagagaagctctattagatacaggagcagatgatacagtattagaagatataaatttgccaggaaaatggaagccaaaaatgatagggggaattggaggttttatcaaggtaaggcaatatgatcagatacttatagaaatttgtggaaaaaaggctataggtacagtgttagtaggacctacacctgtcaacataattggacgaaatatgttgactcagrttggttgtactttaaatttcccaattagtcctattgacactgtaccagtaacattraaaccaggaatggatggaccaagggttaaacagtggccattgacagaagaaaaaataaaagcatta…
302696_2016_AE	cctcaaatcactctttggcaacgaccccttgtcacaataaaaatagaaggacagctaaaagaagctctattagatacaggagcagatgatacagtrytagaagatataaatttgccaggaaaatggaaaccaaaaatgataggrgraattggaggttttatcaaagtaaggcaatatgaksagatacttatagamatttgtggaaaaaaggctataggtacagtgttagtrggacctacacctgtcaacataattggacgaaatatgttractcagcttggttgtactttaaattttccaatcagtcctattgatactgtaccagtaaaattaaagccaggaatggatggcccaaaggttaaacaatggccattgacaaaagagaaaatagaagcatta…
302793_2016_AE	cctcaaatcastctttggcaacgaccccttgtcacaataaaaataggaggacagttaagagaagctctactagatacaggagcagatgatacagtattagaagaaataaatttgccaggaaaatggaaaccaaaaatgatagggggaattggaggytttatcaaagtaaggcaatatgatcaratacttrtagaaatttgtggaaaaaaggctataggtacagtgttggtaggacctacacctatcaacataattggacgaaatatgttgactcagcttggttgtactttaaatttcccaattagtcctattgacactgtaccagtaacattaaagccaggaatggatggaccaaaggttaaacagtggccattgacagaagaaaaaataaaagcatta…
302799_2016_AE	cctcaaatcactctttggcaacgaccccttgtcacaataaaaataggaggacagttgagagaagctctaytagatacaggagcagatgatacagtattagaagacataaatttgccaggaaaatggaaaccaaaaatgatagggggaattggaggttttatcaaagtaaggcaatatgatcagatacttatagaaatttgtggaaaaaaggctataggtacagtgttggtaggacctacacctgtcaacataattggacgaaatatgttgactcagcttggttgtactttaaatttcccaattagtcctattgacactgtaccagtaacattaaagccaggaatggatggaccaaaggttaaacagtggccattgacagaagaaaaaataaaagcatta…
302818_2016_AE	cctcaaatcactctttggcaacgaccccttgtcacagtaaaaataggaggacagatgaaagaagctctattagatacaggagcagatgatacagtattagaagagataaatttgccagggaaatggaaaccaaaaatgatagggggaattggaggttttatcaaagtaaggcaatatgatcagatacttatagaaatttgtgggaaaaaagctataggtacagtgctagtaggacctacacctgtcaacataattggacgaaatatgttgactcaaattggttgcactttaaatttcccaattagccctattgacactgtaccagtaacattaaagccaggaatggatggaccaaaagttaaacagtggccattgacagaagaaaaaataaaagcatta…
302827_2016_AE	cctcaaatcactctttggcagcgaccccttgttaccataaaaatagggggacagctgaaagaagctctgttagacacaggagcagatgatacagtattagaagatataaatttgccaggaaaatggaagccaaaaatgatagggggaattggaggttttatcaaagtaaggcaatatgatcagatacttatagaaatttgtggaaaaaaggctataggcacagtattagtaggacctacacctgtcaacataattggacgaaatatgttgactcagattggttgtactttaaatttcccaattagtcctattgacactgtaccagtaacattaaagccaggaatggatggaccaaaggttaaacagtggccattgacagaagaaaaaataaaagcatta…
302889_2016_AE	cctcaaatcactctttggcaacgacctcttgtcataataaaaatagarggacarctgaaagaagctctattagatacaggagcagatgatacagtgttagaagatataaatttaccaggaaaatggaarccaaaaatgatagggggaattggaggttttatcaaagtaaggcaatatgatgagatacywatagaaatttgtggaaaaaaggctataggtacagtgttagtaggacctacacctgtcaacataattggacgaaatatgttgactcagcttggttgtactttaaattttccaattagtmmtattgacactgtaccagtaacattaaagccaggaatggatggaccaaaggttaaacagtggccattgacagaagaaaaaataaaagcatta…
302965_2016_AE	cctcaaatcactctttggcaacgaccccttgtcacaataaaaatagggggacaactaaaagaagctctattagatacaggagcagatgatacagtattagaagatataaatttgccaggaaaatggaaaccaaaaatgatagggggaattggaggttttatcaaggtaaggcaatatgatcagatacttatagaaatttgtggaaaaaaggctataggtacagtactagtaggacctacacctgtcaacataattgggcgaaatatgttgactcaaattggttgtactttaaatttccccattagtcctattgagactgtaccagtaaaattaaagccaggaatggatggaccaaaggttaaacagtggccattgacagaagaaaaaataaaagcatta…
303135_2017_AE	CCTCAAATCACTCTTTGGCAACGACCCATTGTCACAGTAAAAATAGGAGGACAGMTAAAAGAAGCTCTATTAGATACAGGAGCAGATGATACAGTATTAGAAGAAACAAATTTGCCAGGAAAATGGAAACCAAAAATGATAGGGGGAATTGGAGGTTTTATCAAAGTAAGGCAATATGATCAGATACTYATAGARATTTGTGGRAAAAGGGCTGTRGGTACAGTRYTAGTAGGRCCTACRCCTGTCAACATAATTGGAAGAAATATGTTGACTCAGATTGGTTGTACTCTAAATTTCCCAATTAGCCCTATTGACACTGTACCAGTAACATTAAAGCCAGGAATGGATGGACCAAGGGTTAAACAGTGGCCATTGACAGAAGAAAAAATAAAAGCATTA…
303600_2017_AE	cctcaaatcactctttggcaacgaccccttgtcacagtaaaaatagaaggacagttgagagaagctctattagatacaggagcagatgatacagtattagaagatatagatttgccaggaaaatggaaaccaaaaatgatagggggaattgggggttttatcaaagtaaggcaatatgaggagataactctagaaatttgtggaaaaaaggccataggtacagtgttagtaggacctacacctgtcaacataattggacgaaatatgttgactcagctgggttgtactctaaattttccaattagtcctattgacactgtaccagtaacattaaagccaggaatggatggaccaaaggttaaacagtggccattgacagaagaaaaaataaaagcatta…
325017_2016_AE	CCTCAAATCACTCTTTGGCAACGACCCCTTGTCACAGTAAAAATAGGAGGACAGATGAAAGAAGCTCTATTAGATACAGGAGCAGATGATACAGTATTAGAAGAAATAAATTTGCCAGGGAAATGGAAACCAAAAATGATAGGGGGAATTGGAGGTTTTATCAAAGTAAGGCAATATGATCAGATACTTATAGAAATTTGTGGGAAAAAAGCTATAGGTACAGTGCTAGTAGGACCTACACCTGTCAACATAATTGGACGAAATATGTTGACTCAAATTGGTTGCACTTTAAATTTCCCAATTAGCCCTATTGACACTGTACCAGTAACATTAAAGCCAGGAATGGATGGACCAAAAGTTAAACAGTGGCCATTGACAGAAGAAAAAATAAAAGCATTA…
328948_2016_AE	cctcaaatcactctttggcaacgaccccttgtcacaataaaaataggagggcagctgaaagaggcgctattagatacaggagcagatgatacagtattagaagatataaacttgccaggaaaatggaaaccaaaaatgatagggggaattggaggttttatcaaagtaaggcaatatgatcagatacttatagaaatttgtggaaaaaaggctataggtacagtgttagtaggacctacacctgtcaacatagttggacgaaatatgttgactcagmttggttgtactttaaatttcccaataagtcctattgacactgtaccagtaaaattaaagccaggaatggatggaccaaaggttaaacagtggccattgacagaagaaaaaataaaagcatta…
130058_2016_AE	~~~~~~~~~~~~~~~TGGCAACGACCCCTTGTCACAGTAAAAGTAGRAGGACAGTTGAGAGAAGCTCTATTAGATACAGGAGCAGATGATACAGTATTAGAAGAAATAAATTTGCCAGGAAAATGGAAACCAAAAATGATAGGGGGAATTGGAGGTTTTATCAAAGTAAGACAATATGATCAGATACTTATAGAAATTTGTGGAAAAAGGGCTATAGGTACAGTRTTAGTAGGACCTACACCTGTCAACATAATTGGACGAAATATGTTGACTCAACTCGGTTGTACTTTAAATTTTCCAATTAGTCCTATTGACACTGTACCAGTAACATTAAAGCCAGGAATGGATGGACCAAAGGTTAAACAGTGGCCATTAACAGAAGAAAAAATAAAAGCATTR…
302563_2016_AE	cctcaaatcactctttggcaacgaccccttgtcacaataaaaataggaggagarctaaragaagctctattagacacaggagcagatgatacagtattagaagatataaatttgccaggaaaatggaagccaaaawtgatagggggaattggaggttttatcaaggtaaggcaatatgatcaaatacctatagaaatttgtggaaaaagggctataggtacagtgttagtaggacctacacctgtcaacataattggacgaaacatgttgactcaacttggttgtactttaaattttccaattagtcctattgacactgtaccagtaacattaaagccaggaatggatggaccaaaggttaaacagtggccattgacagaagaaaaaataaaagcatta…
302597_2016_AE	cctcaaatcactctttggcagcgaccagttgttacagtaaaaatagaaggacagctgagagaagctctattagatacaggagcagatgatacagtactagaaaatataaatttgccaggaaaatgaaaaccaaaaatgatagggggaattggaggttttatcaaagtaaggcaatatgatcagatacttatagaaatttgtaaaaaaaaggctataggtacagtgttagtagggcctacacctgtcaacataattggacgaaatatgttgactcagattggttgtactttaaattttccaattagtcctattgacactgtaccagtaaaattaaagccaggaatggatggaccaaaggttaaacagtggccattgacagaagaaaaaataaaagcatta…
302668_2016_AE	cctcaaatcactctttggcaacgaccccttgtcacaataaaaataggaggacagctaagagaagctctattagatacaggagcagatgatacagtattagaagatataaatttaccaggaaagtggaaaccaaaaatgatagggggaattggaggttttatcaaggtaagacaatatgatcagatacctatagaaatttgtggaaagagggctataggtacagtgttagtaggacctacccctgtcaacataattggacgaaatatgttgacccagattggttgtactttaaatttcccaattagtcctattgacactgtaccagtaacattaaagccaggaatggatggaccaaaggttaaacagtggccattgacagaagaaaaaataaaagcatta…
302711_2016_AE	cctcaaatcactctttggcaacgacccctagtcacagtaaaagtaggaggacagatgagagaagctctattagatacaggagcagatgatacagtattagaagatataaatttgccaggaaaatggaaaccaaaaatgatagggggaattggaggttttatcaaggtaaggcaatatgatcarrtacytatagaaatttgtggaaaaaaggctataggttcagtgttagtagggcctacacctatcaacataattggacgaaatatgttgactcagcttggttgtactttaaatttcccaattagtcctattaacactgtaccagtaacattaaagccaggaatggatgggccaaaggttaaacagtggccattgacagaagaaaaaataaaagcatta…
302774_2016_AE	cctcaaatcactctttggcaacgaccccttgtcacaataaaaatagaaggacagytgagagaagctctactagatacaggagcagatgatacagtattagaagatataaatttgccaggaaaatggaaaccaaaaatgatagggggaattggaggttttatcaaagtaaggcaatatgatcagatacaaatggaaatttgtggaaaaaaggctrtaggtacagtgttggtaggacctacacctrtcaacataattggacgaaatatgttgactcagcttggttgtactttaaatttcccaattagtcctattgacactgtaccagtaaaattaaagccaggaatggatgggccaaaggttaaacagtggccattgacagaagaaaaaataaaagcatta…
302787_2016_AE	cctcaaatcactctttggcaacgaccccttgtcacaataaaaataggagggcagctaagagaagctctattagatacaggagcagatgatacagtattagaagatataaatttgccaggaaaatggaaaccaaaaatgatagggggaattggaggttttatcaaggtaaggcaatatgatcagatacctatagaaatttgtggaaaaaaggctataggtacagtattagtaggacctacacctgtcaacataattggacgaaatatgttgactcagcttggttgtactttaaatttcccaattagtcctattgacactgtaccagtaaaattaaagccaggaatggatggaccaaaggttaaacagtggccattgacagaagaaaaaataaaagcatta…
302840_2016_AE	cctcaaatcactctttggcaacgacccctcatcacaataaaaatagaaggacagstgaaagaagctytattagatacaggagcagatgatacagtgttagaagatataaatttaccaggaaaatggaaaccaaaaatgatagggggaattggaggttttatcaaagtaaggcaatatgatcagatacttatagaaatttgtggaaaaaaggctataggtacagtgttrgtaggacctacacctgtcaacataattggacgaaatatgttgactcarattggttgtactttaaattttccaattagccctattaacactgtaccagtaacattaaagccaggaawggatggaccaaaggttaaacagtggccattgacaaaagaaaaaataaaagcatta…
302853_2016_AE	cctcaaatcactctttggcaacgaccccttgtcacaataaaaatagagggacagctgaaagaagctctattagatacaggagcagatgatacagtgttagaagatataaatttaccaggaaaatggaaaccaaaaatgatagggggaattggaggttttatcaaagtaaggcaatatgatcagatacttatagaaatttgtggaaaaaaggctatagggacagtgttagtaggacctacacctgtcaacataattggacgaaatatgttgactcagcttggttgtactttaaattttccaattagtcctgttgacactgtaccagtaacattaaagccaggaatggatggaccaaaggttaaacagtggccattgacagaagaaaaaataaaagcrtta…
302957_2016_AE	cctcaaatcactctttggcaacgacccgttgtcacaataaaaatagaaggacagttgagagaagctctactagatacaggagcagatgatacagtattagaagatataaatttgccaggaaaatggaaaccaaaaatgatagggggaattggaggttttatcaaagtaaggcaatatgatsagatacttatagaaatttgtggaaaaarggctmtaggtacagtgttggtaggacctacacctgtcaacataattggacgaaatatgttgactcagcttggttgtactttaaatttcccaattagtcctattgacactgtaccagtaamattaaagccaggaatggatggaccaaaggttaaacagtggccattgacagaagaaaaaataaaagcattr…
328978_2016_AE	cctcaaatcactctttggcaacgaccccttgtcacagtaaaagtaggaggacagttgagagaagctctattagatacaggagcagatgatacagtattagaagatataaatttgccaggaaaatggaaaccaaaaatgatagggggaattggaggttttatcaaagtaaggcaatatgatcagatacttatagaaatttgtggaaaaagggctataggtacagtattagtaggacctacaccggtcaacataattggacgaaatatgttgactcaacttggttgtactttaaattttccaattagtcctattgacactgtaccagtaacattaaagccaggaatggatggaccaaaggttaaacagtggccattaacagaagaaaaaataaaagcatta…
303134_2017_AE	CCTCAAATCACTCTTTGGCAACGACCCCTTGTCACAATAAAAATAGGAGGACAGCTAAAAGAAGCTCTATTAGATACAGGAGCAGATGATACAGTATTAGAAGATATAAATTTACCAGGAAAATGGAAACCAAAAATGATAGGGGGAATTGGAGGTTTTATCAAAGTAAGGCAATATGATCAGATAACTATAGAAATTTGTGGAAAAAGGGCTATAGGTACAGTGTTAGTAGGACCTACACCTGTCAACATAATTGGACGAAACATGTTGACTCAGCTTGGTTGCACTTTAAATTTCCCAATTAGTCCTATTGACCCTGTACCAGTAACATTAAAGCCAGGAATGGATGGACCAAAGGTTAAACAATGGCCATTGACAGAAGAAAAAATAAAAGCATTA…
011710_2017_AE	CCTCAAATCACTCTTTGGCAACGACCCCTTGTCACAGTAAAAGTAGRAGGACAGTTGAGAGAAGCTCTATTAGATACAGGAGCAGATGATACAGTATTAGAAGATATAAATTTGCCAGGAAAATGGAAACCAAAAATGATAGGRGGAATTGGAGGTTTTATCAAGGTAAGACAATATGATCAGATACTTATAGAAATTTGTGRAAAAARGGCTATAGGTACAGTGTTAGTAGGACCTACACCTGTCAACATAATTGGACGAAATATGTTGACTCAACTYGGTTGTACTTTAAATTTTCCAATTAGTCCTATTGACACTGTACCAGTAACATTAAAGCCAGGAATGGATGGACCAAAGGTTAAACAGTGGCCATTAACAGAAGAAAAAATAAAAGCATTA…
011708_2017_AE	~~~~~~~~~~~~~~~TGGCAACGACCCCTTGTCACAATAAAAATAGGGGGACAACTAAAAGAAGCTCTATTAGATACAGGAGCAGATGATACAGTATTAGAAGATATAAATTTGCCAGGAAAATGGAAACCAAAAATGATAGGGGGAATTGGAGGATTTATCAAGGTAAGGCAATATGATCAGATACTTATAGAAATTTGTGGAAAAAAGGCTATAGGTACAGTATTAGTAGGACCTACACCTGTCAACATAATTGGACGAAATATGTTGACTCAAATTGGTTGTACTTTAAATTTCCCCATTAGTCCTATTGACACTGTACCAGTAAAATTAAAGCCAGGAATGGATGGACCAAAGGTTAAACAGTGGCCATTGACAGAAGAAAAAATAGAAGCATTA…
011712_2017_AE	CCTCAAATCACTCTTTGGCAACGACCCCTTGTCACAGTAAAAGTAGAAGGACAGTTGAGAGAAGCTCTATTAGATACAGGAGCAGATGATACAGTATTAGAAGATATAAATTTGCCAGGAAAATGGAAACCAAAAATGATAGGRGGAATTGGAGGTTTTATCAAGGTAAGACAATATGATCAGATACTTATAGAAATTTGTGGAAAAAGGGCTATAGGTACAGTGTTAGTAGGACCTACACCTGTCAACATAATTGGACGAAATATGTTGACTCAACTCGGTTGTACTTTAAATTTTCCAATTAGTCCTATTGACACTGTACCAGTAACATTAAAGCCAGGAATGGATGGACCAAAGGTTAAACAGTGGCCATTAACAGAAGAAAAAATAAAAGCATTA…
011717_2017_AE	~~~~~~~~~~~~~~~TGGCAACGACCCCTTGTCACAATAAAAATAGGGGGACAGCTAAGAGAAGCTYTATTAGATACAGGAGCAGATGATACAGTATTAGAAGATATAAATTTGCCAGGAAAATGGAAACCAAAAATGATAGGGGGAATTGGAGGTTTTATCAAAGTAAGGCAATATGATCAGATAGCTATAGAAATTTGTGGAAAAAAGGCTATAGGTACAGTGTTAGTAGGACCTACACCTATCAACATAATTGGACGAAATATGTTGACTCAGCTTGGTTGTACTTTAAATTTTCCAATTAGTCCTATTGACACTGTACCAGTAACATTAAAGCCAGGAATGGATGGACCAAAGGTTAAACAGTGGCCATTGACAGAAGAAAAAATAAAAGCATTA…
011715_2017_AE	~~~~~~~~~~~~~~~TGGCAACGACCCCTTGTCACAGTAAAARTAGGAGGACAGTTGAGAGAAGCTCTATTAGATACAGGAGCAGATGATACAGTATTAGAAGATATAAATTTGCCAGGAAAATGGAAACCAAAAATGATAGGGGGAATTGGAGGTTTTATCAAAGTAAAACAATATGATCAGATACTTATAGAAATTTGTGGAAAAAAGGCTATAGGTACAGTATTAGTAGGACCTACACCTGTCAACATAATTGGACGAAATATGTTGACTCAACTCGGTTGTACTTTAAATTTTCCAATTAGTCCTATTGACACTGTACCAGTAACATTAAAGCCAGGAATGGATGGACCAAAGGTTAAACAGTGGCCATTAACAGAAGAAAAAATAAAAGCATTA…
130003_2017_AE	~~~~~~~~~~~~~~~TGGCAACGACCCCTTGTCACAGTAAAAGTAGRAGGACAGTTGAGAGAAGCTCTATTAGATACAGGAGCAGATGATACAGTATTAGAAGATATAAATTTGCCAGGAAAATGGAAACCAAAAATGATAGGGGGAATTGGAGGTTTTATCAAAGTAAGACAATATGATCAGATACTTATAGAAATTTGTGGAAAAARGGCYATAGGTACAGTRTTAGTAGGACCTACACCTGTCAACATAATTGGACGAAATATGTTGACTCAACTCGGTTGTACTTTAAATTTTCCAATTAGTCCTATTGACACTGTACCAGTAACATTAAAGCCAGGAATGGATGGACCAAAGGTTAAACAGTGGCCATTAACAGAAGAAAAAATAAAAGCATTA…
021416_2017_AE	~~~~~~~~~~~~~~~TGGCAGCGACCCCTAGTCACAATAAAAATAGGAGGACAGCTGARAGAAGCTCTATTAGATACAGGAGCAGATGATACAGTRTTAGAAGAWATAAATTTGCCAGGAAAATGGAAACCAAAAATGATAGGGGGAATTGGAGGTTTTATCAAAGTAAGACAATATGATCAGATACCTMTAGAAATTTGTGGAAAAAAGGCTATAGGTACAGTRTTAGTAGGACCTACACCTGTCAACATAATTGGACGAAATATGTTGACTCAGCTTGGTTGTACTTTAAATTTCCCMATTAGTCCTATTGACACTGTACCAGTAACAYTAAAGCCAGGAATGGATGGACCAAAGGTTAAACAATGGCCATTGACAGAAGAAAAAATAAAAGCATTA…
022140_2017_AE	~~~~~~~~~~~~~~~TGGCAACGACCCCTTGTCACAATAAAAATAGAAGGACAGTTGAGAGAAGCTCTACTAGATACAGGAGCAGATGATACAGTATTAGAAGATATAAATTTGCCAGGAAAATGGAAACCAAAAATGATAGGGGGAATTGGAGGTTTTATCAAAGTAAGGCAATATGATCAGATACTTATAGAAATTTGTGGGAAAAAGGCTATAGGTACAGTGTTGGTAGGACCYACACCTGTCAACATAATTGGACGAAATATGTTGACTCAGCTTGGTTGTACTTTAAATTTCCCAATTAGTCCTATTGACACTGTACCAGTAACATTAAAGCCAGGAATGGATGGACCAAAGGTTAAACAGTGGCCATTGACAGAAGAAAAAATAAAAGCATTA…
303242_2017_AE	~~~~~~~~~~~~~~~TGGCAACGACCCCTTGTCACAATAAAAATAGGAGGACAGCTAAAAGAAGCTCTATTAGATACAGGGGCAGATGATACAGTATTAGAAGATATAAATTTGCCAGGAAAATGGAAACCAAAAATGATAGGGGGAATTGGAGGTTTTATCAAAGTAARGCAATATGATCAGGTACTTATAGAAATTTGTGGAAAAAGGGCTATAGGTACAGTRTTAGTAGGACCTACACCTGTCAACATAATTGGGCGAAATATGTTGACTCAGATTGGTTGTACTTTAAATTTACCAATTAGTCCTATTGACACTGTACCAGTAACATTAAAGCCAGGGATGGATGGACCAAAGGTTAAACAGTGGCCATTGACAGAAGAAAAAATAAAAGCATTA…
022806_2017_AE	~~~~~~~~~~~~~~~TGGCAACGACCCCTTGTCACAGTAAAAATAGAAGGACAGCTAAGAGAAGCTCTATTAGATACAGGAGCAGATGATACAGTATTAGAAGATATAAATTTGCCAGGAAAATGGAAACCAAAAATGATAGGGGGAATTGGAGGTTTTATCAAAGTAAGGCAATATGATCAGATATCTATGGAAATTTGTGGAAAGAAGGCTATAGGTACAGTGTTAGTAGGACCTACACCTGTCAACATAATTGGACGAAATATGTTGACTCAGCTTGGTTGTACCTTAAATTTTCCAATTAGTCCTATTGACACTGTACCAGTAACATTAAAGCCAGGAATGGATGGGCCAAAGGTTAAACAGTGGCCRTTGACAGAAGAAAAAATAAAAGCATTA…
303184_2017_AE	~~~~~~~~~~~~~~~TGGCAACGACCCCTCGTCACAATAAGAGTAGAAGGACAGCTGAAAGAAGCTCTATTAGATACAGGAGCAGATGATACAGTGTTAGAAGAGATAAATTTACCAGGGAAATGGAAACCAAAAATGATAGGGGGAATTGGAGGTTTTATCAAGGTAAGGCAATATGATCAAATACTTATAGAAATTTGTGGAAAAAAGGCTATAGGTACAGTGTTAGTAGGACCTACACCTGTCAACATAATTGGACGAAATATGTTGACTCAGCTTGGTTGTACTTTAAATTTTCCAATTAGTCCTATTGACACTGTACCAGTAACATTAAAGCCAGGAATGGATGGGCCAAAGGTTAAACAGTGGCCATTGACAGAAGAAAAAATAAAAGCATTA…
303186_2017_AE	CCTCAAATCACTCTTTGGCAACGACCCCTTGTCACAGTAAAAGTAGGAGGACAGTTGAGAGAAGCTCTACTAGACACAGGAGCAGATGATACAGTATTAGAAGATATAAATTTGCCAGGAAAATGGAAACCAAAAATGATAGGGGGAATTGGAGGTTTTATCAAAGTAAGRCAATATGATCAGATACTTATAGAAATTTGTGGAAAAAAGGCTATAGGTACAGTGTTGGTAGGACCTACACCTGTCAACATAATTGGACGAAATATGTTGACTCAGCTTGGTTGTACTTTAAATTTCCCAATTAGTCCTATTGACACTGTACCAGTAACATTAAAGCCAGGAATGGATGGACCAAAGGTTAAACAGTGGCCATTAACAGAAGAAAAAATAAAAGCATTA…
303201_2017_AE	CCTCAAATCACTCTTTGGCAACGACCCCTTGTCACAATAAAAATAGAAGGACAGCTGAGAGAAGCTCTGTTAGATACAGGAGCAGATGATACAGTATTAGAAGATATAAATTTGCCAGGAAAATGGAAACCAAAAATGATAGGGGGAATTGGAGGTTTTATCAAAGTAAGGCAATATGATCAGATACTTATAGAAATTTGTGGAAAAAAGGCTATAGGTACAGTATTAGTAGGACCTACACCTGTCAACATAATTGGACGAAATATGTTGACTCAGCTTGGTTGTACTTTAAATTTCCCAATTAGTCCTATTGAGACTGTACCAGTAACATTAAAGCCAGGAATGGATGGACCAAAGGTTAAACAGTGGCCATTAACAGAAGAAAAAATAATAGCATTA…
130012_2017_AE	~~~~~~~~~~~~~~~TGGCAACGACCCCTTGTCACAGTAAAAGTAGGAGGRCAGTTGAGAGAAGCTCTATTAGATACAGGAGCAGATGATACAGTATTAGAAGATATAAATTTGCCAGGAAAATGGAAACCAAAAATGATAGGGGGAATTGGAGGTTTTATCAAAGTAAGACAATATGATCAGATACTTATAGAAATTTGTGGAAAAAGGGCTATAGGTACAGTATTAGTAGGACCTACACCTGTCAACATAATTGGACGAAATATGTTGACTCAACTCGGTTGTACTTTAAATTTTCCAATTAGTCCTATTGACACTGTACCAGTAAAATTAAAGCCAGGAATGGATGGACCAAAGGTTAARCAGTGGCCATTAACAGAAGAAAAAATAAAAGCATTA…
303225_2017_AE	CCTCAAATCACTCTTTGGCAACGACCMCTAGTCAAAATAAAAATAGAGGGACAGCTAAAAGAAGCTCTATTAGATACAGGAGCAGATGATACAGTATTAGAAGATATAAATTTGCCAGGAAAATGGAAACCAAAAATGATAGGGGGAATTGGAGGTTTTATCAAGGTAAGRCAATATGATCAGGTAGTTATAGAAATTTGTGGAAAAAARGCTATAGGTACAGTGTTAGTAGGACCTACACCTATCAACATAATTGGACGAAACATGTTGACTCAGATTGGTTGTACTTTAAATTTTCCAATTAGCCCTATTGACACTGTACCAGTAACATTAAAGCCAGGAATGGATGGACCAAAGGTTAAACAGTGGCCATTGACAGAAGAAAAAATAAAAGCTTTA…
303250_2017_AE	CCTCAAATCACTCTTTGGCAACGACCCATTGTCACAATAAAAATAGAAGGACAGCTAAGAGAAGCTCTATTAGATACAGGAGCAGATGATACAGTATTAGAAGATATAAATTTGCCAGGAAAATGGAAACCAAAAATGATAGGGGGAATTGGAGGTTTTATCAAAGTAAGGCAATATGATCAGATAACTATAGAMATTTGTGGAAAGAAGGCTAYAGGTACAGTGTTAGTAGGACCTACACCTRTCAACATAATTGGACGAAATATGTTGACTCAGATTGGTTGTACTTTAAATTTCCCAATTAGTCCTATTGACACTGTACCAGTAACATTAAAGCCAGGAATGGATGGACCAAAGGTTAAACARTGGCCATTGACAGAAGAAAAAATAAAAGCATTA…
032114_2017_AE	~~~~~~~~~~~~~~~TGGCARCGACCCMTWGTCACAATAAAAATAGGAGGACAGCTAAGAGAAGCTCTATTAGATACAGGAGCAGATGATACAGTATTAGAAGATATAAATTTGCCAGGAAAATGGAAACCAAAAATGATAGGGGGAATTGGAGGTTTTATCAARGTAAAGCAATATGATCAGGTAWCTATAGAAATTTGTGGAAAGAGRGCTATAGGTACAGTGTTAGTRGGACCTACACCTGTCAACATAATTGGACGAAATATGTTGACTCAGATTGGKTGTACTCTAAATTTCCCAATTAGTCCTATTGACACTGTACCAGTAACATTAAAGCCAGGAATGGATGGACCWAAGGTTAAACARTGGCCATTGACAGAAGAAAAAATAAAAGCATTA…
032102_2017_AE	~~~~~~~~~~~~~~~TGGCAACGACCCCTTGTCACAGTAAAAGTAGAAGGACAGTTGAGAGAAGCTCTACTAGATACAGGAGCAGATGATACAGTATTAGAAGATATAAATTTGCCAGGAAAATGGAAACCAAAAATGATAGGGGGAATTGGAGGTTTTATCAAAGTAAGGCAATATGATCAGATACTTATAGAAATTTGTGGGAAAAAGGCTATAGGTACAGTGTTGGTAGGACCTACACCTGTCAACATAATTGGACGAAATATGTTGACTCAGCTTGGTTGTACTTTAAATTTCCCAATTAGTCCTATTGACACTGTACCAGTAACATTGAAGCCAGGAATGGATGGACCAAAGGTTAAACAGTGGCCATTAACAGAAGAAAAAATAAAAGCATTA…
032807_2017_AE	~~~~~~~~~~~~~~~TGGCAACGACCCCTTGTCACAATAAAAATAGGGGGACAACTAAAAGAAGCTCTATTAGATACAGGAGCAGATGATACAGTATTAGAAGATATAAATTTGCCAGGAAAATGGAAACCAAAAATGATAGGGGGAATTGGAGGTTTTATCAAGGTAAAGCAATATGATCAGATACTTATAGAAATTTGTGGGAAAAAGGCTATAGGTACAGTATTAGTAGGACCTACACCTGTCAATATAATTGGACGAAATATGTTGACTCAAATTGGTTGTACTTTAAATTTCCCCATTAGTCCTATTGACACTGTACCAGTAAAATTAAAGCCAGGAATGGATGGGCCAAAGGTTAGACAATGGCCATTGACAGAAGAAAAAATAAAAGCATTA…
303299_2017_AE	CCTCAAATCACTCTTTGGCAACGACCCCTTGTCACAATAAAGATAGAAGGACAGCTAAAAGAAGCTCTATTAGATACAGGAGCAGATGATACAGTATTAGAAGATATAAATCTGCCAGGAAAATGGAAACCAAAAATGATAGGGGGAATTGGAGGTTTTATCAAAGTAAGGCAATATGATGAGATACTTATAGAAATTTGTGGAAAAAAGGCTATAGGTACAGTGTTAGTGGGACCTACACCTGTCAACATAATTGGACGAAATATGTTGACTCAGCTTGGTTGTACTTTAAATTTTCCAATCAGTCCTATTGATACTGTACCAGTAAAATTAAAGCCAGGAATGGATGGCCCAAAGGTTAAACAATGGCCATTGACAAAAGAGAAAATAGAAGCATTA…
041126_2017_AE	cctcaaatcactctttggcaacgaccccttgtcacawtaaaaataggaggagagctaagagaggctctattagatacaggagcagatgatacagtattagaagatataaatttgccaggaaaatggaaaccaaaaatgatagggggaattggaggttttatcaaagtaaggcaatatgatcagatacctatagaaatttgtggaaaaagggctataggtacagtgttagtaggacctacacctgtcaacataattggacgaaatatgttgactcagcttggttgtactttaaatttcccaattagtcctattgaaactgtaccagtaaaattaaagccaggaatggatggaccaaaggttaaacagtggccattgacagaagaaaaaataaaagcatta…
041133_2017_AE	~~~~~~~~~~~~~~~TGGCAACGACCCCTTGTCACAATAAAAATAGGAGGACAGCTAAGAGAAGCTCTATTAGATACAGGAGCAGATGATACAGTATTAGAAGATATAAATTTGCCAGGAAAATGGAAACCAAAAATGATAGGGGGAATTGGAGGTTTTATCAAGGTAAGGCAATATGATCAGATACCTATAGAAATTTGTGGAAAAAAGGCTATAGGTACAGTGTTAGTAGGACCTACACCTGTCAACATAATTGGACGAAATATGTTGACTCAGCTTGGTTGTACTTTAAATTTCCCAATTAGTCCTATTGACACTGTACCAGTAACATTAAAGCCAGGAATGGATGGACCAAAGGTTAAACAGTGGCCATTGACAGAAGAAAAAATAAAAGCATTA…
303300_2017_AE	CCTCAAATCACTCTTTGGCAACGACCCCTTGTCACAATAAAGATAGAAGGACAGCTAAAAGAAGCTCTATTAGATACAGGAGCAGATGATACAGTATTAGAAGATATAAATTTGCCAGGAAAATGGAAACCAAAAATGATAGGGGGAATTGGAGGTTTTATCAAAGTAAGGCAATATGATGAGATACTTATAGAAATTTGTGGAAAAAAGGCTATAGGTACAGTGTTAGTGGGACCTACACCTGTCAACATAATTGGACGAAATATGTTGACTCAGCTTGGTTGTACTTTAAATTTTCCAATCAGTCCTATTGATACTGTACCAGTAAAATTAAAGCCAGGAATGGATGGCCCAAAGGTTAAACAATGGCCATTGACAAAAGARAAAATAGAAGCATTA…
303288_2017_AE	cctcaaatcactctttgrcaacgaccccttgtcacaataaaaatagaaggacagctgaaggaagctctattagatacaggagcagatgatacagtattagaagatataaatttgccaggaaaatggaaaccaaaaatgataggaggaattggaggttttatcaaagtaaggcaatatgatcaaatacagatagaaatttgtggaaaaaaggctataggtacagtgttagtaggacctacacctgtcaacataattgggcgaaatatgttgactcagcttggttgtactttaaattttccaattagtcctattgacaccgtaccagtaacattaaagccaggaatggatggaccaaaggttaaacagtggccattgacagaagaaaaaataaaagcatta…
041813_2017_AE	~~~~~~~~~~~~~~~TGGCAACGACCYCTTGTCACAGTAAAAGTAGGAGGACAGTTGARAGAAGCTCTATTAGATACAGGGGCAGATGATACAGTATTAGAAGATATARATTTGCCAGGAAAATGGAAACCAAAAATGATAGGGGGAATTGGAGGTTTTATCAAAGTAAGACAATATGATCAGATACTTATAGAAATTTGTGGAAAAAGGGCTATAGGTACAGTGTTAGTAGGACCTACACCTRTCAACATAATTGGACGAAATATGTTGACTCAAATTGGTTGTACTTTAAATTTTCCAATTAGTCCTATTGACACTGTACCAGTAAAATTAAAGCCAGGAATGGATGGACCAAAGGTTAAACAGTGGCCATTGACAGAAGAAAAAATAAAAGCATTA…
042527_2017_AE	~~~~~~~~~~~~~~~TGGCAACGACCCATTGTCACAATAAAAATAGGAGGRCAGCTAAGAGAAGCTCTATTAGATACAGGAGCAGATGATACAGTATTAGAAGATATAAATTTGCCAGGAAAATGGAAACCAAAAATGATAGGGGGAATTGGAGGTTTTATCAAAGTAAGACAATATGATCAGATATCTATAGAAATTTGTGGAAAAAGGGCTATAGGTACAGTGTTAGTAGGACCTACACCTGTCAACATAATTGGACGAAATATGTTGACTCAGCTTGGGTGTACYTTAAATTTTCCTATTAGTCCTATTGACACAGTACCAGTCACATTAAAGCCAGGAATGGATGGACCAAAGGTTAAACAATGGCCATTGACAGAAGAAAAAATAAAAGCATTA…
042506_2017_AE	~~~~~~~~~~~~~~~TGGCAACGACCCCTTGTCACAATAAGAATAGGAGGACAGCTGAAAGAAGCYCTATTAGATACAGGAGCAGATGATACAGTATTAGAAGATATAAATTTRCCAGGAAAATGGAAACCAAAAATGATAGGGGGAATTGGAGGTTTTATCAAAGTAAGGCAATATGATCAGATACTYATAGAGATTTGTGGAAAAAAGGCTATAGGTACAGTGTTAGTAGGACCTACACCTGTCAACATAATTGGACGAAATATGTTGACTCAGATTGGTTGTACTTTAAATTTTCCAATTAGTCCTATTGACACTGTACCAGTAACATTAAAGCCAGGAATGGATGGACCAAAGGTTAAACAATGGCCATTGACAGAAGAAAAAATAAAAGCATTA…
042502_2017_AE	~~~~~~~~~~~~~~~TGGCAACGACCCCTTGTCWCAATAAAAATAGGAGGGCAGWTRARAGAAGCTCTATTAGATAYAGGAGCAGATGATACAGTRTTAGAAGATATAAATTTRCCAGGAAAATGGAAACCAAAAATGATAGGGGGAATTGGAGGTTTTATCAAAGTAAGGCAATATGATCAGATACTTATAGAMATTTGTGGAAAAAAGGCTATAGGTACAGTRTTAGTAGGACCTACACCTRTCAACATAATTGGACGAAATATGTTGACTCAGCTTGGTTGTACTTTAAATTTTCCAATTAGTCCTATTGACACTGTACCAGTAACATTAAARCCAGGWATGGATGGACCAAAGGTTAAACAGTGGCCATYGACAGAAGAAAAAATAAAAGCATTA…
303294_2017_AE	CCTCAAATCACTCTTTGGCAACGACCCRTTGTCACAGTAAAAGTAGGAGGACAGTTGAGAGAAGCTCTATTAGATACAGGAGCAGATGATACAGTATTAGAAGATATAAATTTGCCAGGAAAATGGAAACCAAAAATGATAGGGGGAATTGGAGGTTTTATCAAAGTAAGACAATATGATCAGATACTTATAGAAATTTGTGGAAAAAGGGCTATAGGTACAGTATTAGTAGGACCTACACCTGTCAACATAATYGGACGAAATATGTTGACTCAACTTGGTTGTACTTTAAATTTTCCAATTAGTCCTATTGACACTGTACCAGTAACATTAAAGCCAGGAATGGATGGACCAAAGGTYAGACAGTGGCCATTAACAGAAGAAAAAATAAAAGCATTA…
130021_2017_AE	~~~~~~~~~~~~~~~TGGCAACGACCCCTTGTCACAATAAAAATAGGAGGACAGTTAAGAGAAGCTCTATTAGATACAGGAGCAGATGATACAGTATTAGAAGATATAAATTTGCCAGGAAAATGGAAGCCAAAAATGATAGGGGGAATTGGAGGTTTTATCAAAGTAAGGCAATATGATCAGATAACTATAGAGCTTTGTGGGAAACAGGCTATAGGTACAGTGTTAGTAGGACCTACACCTGTCAACATAATTGGACGAAATATGTTGACCCAGCTTGGTTGTACTTTAAATTTCCCAATTAGTCCTATTGACACTGTACCAGTAAAATTAAAACCAGGAATGGATGGACCAAAGGTTAAACAGTGGCCATTGACAGAAGAAAAAATAAAAGCATTA…
051614_2017_AE	~~~~~~~~~~~~~~~TGGCAACGACCCCTTGTCSCAATAAAAATAGGAGGACAGATAAGAGAAGCTCTATTAGATACAGGAGCAGATGATACAGTATTRGAAGATATAAATTTGCCAGGAAAATGGAAACCAAAAATGATAGGGGGAATTGGAGGTTTTATCAAAGTAAGGCAATATGATCAGATACCTATAGAAATTTGTGGAAAAAAGGCTATAGGYACAGTGTTAGTAGGACCTACACCTRTCAACATAATTGGACGAAATATGTTGACTCAGCTTGGTTGTACTTTAAATTTCCCAATTAGTCCTATTGACACTGTACCAGTAACATTAAAGCCAGGAATGGATGGACCAAAGGTTAAACAGTGGCCATTGACAGAAGAAAAAATAAAAGCATTA…
052304_2017_AE	~~~~~~~~~~~~~~~TGGCAACGACCCCTTGTCACAATAAAAATAGAAGGACAGCTGAAAGAAGCTCTATTAGATACAGGAGCAGATGATACAGTATTAGAAGATATAGATTTGCCAGGGAGATGGAAACCAAAAATGATAGGGGGAATTGGAGGTTTTATTAAAGTAAGRCAATATGATCAGATACTTATAGAAATTTGTGGAAAAAGGGCTATAGGTACAGTGTTAGTAGGACCTACACCTGTCAACATAATTGGACGAAATATGTTGACTCAGATTGGTTGTACTTTAAATTTCCCAATTAGTCCTATTGACACTGTACCAGTAACATTAAAGCCAGGAATGGATGGACCAAAGGTTAAACAGTGGCCATTGACAGAAGAAAAAATAAAAGCATTG…
060605_2017_AE	cctcaaatcactctttggcagcgaccactagtcataataaaagtagaaggacagctgaaagaagctctattagatacaggagcagacgatacagtattagaagatataagtttgccaggaaaatggaaaccaaaaatgatagggggaattggaggttttatcaaagtaagacaatatgatcagatacttatagaaatttgtggaaaaaaggctataggtacagtattagtaggacctacacctgtcaacataattggacgaaatatgttgactcagcttggttgtactttaaatttcccaattagtcctattgacactgtaccagtaaaattaaagccaggaatggatggaccaaagattaaacagtggccactgacagaagaaaaaataaaagcatta…
060606_2017_AE	~~~~~~~~~~~~~~~TGGCAGCGACCACTAGTCATAATAAAAGTAGAAGGACAGCTGAAAGAAGCTCTATTAGATACAGGAGCAGACGATACAGTATTAGAAGATATAAGTTTGCCAGGAAAATGGAAACCAAAAATGATAGGGGGAATTGGAGGKTTTATCAAAGTAAGACAATATGATCAGATACTTATAGAAATTTGTGGAAAAAAGGCTATAGGTACAGTATTAGTAGGACCTACACCTGTCAACATAATTGGACGAAATATGTTGACTCAGCTTGGTTGTACTTTAAATTTCCCAATTAGTCCTATTGACACTGTACCAGTAMAATTAAAGCCAGGAATGGATGGACCAAAGATTAAACAGTGGCCACTGACAGAAGAAAAAATAAAAGCATTA…
303355_2017_AE	CCTCAAATCACTCTTTGGCAACGACCCCTTGTCACAATAAAAATAGGGGGACAACTAAAAGAAGCTCTATTAGATACAGGAGCAGATGATACAGTATTAGAAGATATAAATTTGCCAGGAAAATGGAAACCAAAAATGATAGGGGGAATTGGAGGTTTTATCAAGGTAAGACAATATGATCAGATACTTATAGAAATTTGTGGAAAAAGGGCTATAGGTACAGTATTAGTAGGACCTACACCTGTCAACATAATTGGGCGAAATATGTTGACTCAAATTGGTTGTACTTTAAATTTCCCCATTAGTCCTATTGAAACTGTACCAGTAAAATTAAAGCCAGGAATGGATGGACCAAAGGTTAAACAGTGGCCATTGACAGAAGAAAAAATAAAAGCATTA…
303357_2017_AE	CCTCAAATCACTCTTTGGCAACGACCCGTTGTCACAGTAAGAATAGAAGGACAGCTGAAGGAAGCCCTATTAGATACAGGGGCAGATGATACAGTATTAGAAGATATAAATTTGCCAGGAAAATGGAAACCAAAAATGATAGGGGGAATTGGAGGTTTTATCAAAGTAAGGCAATATGATCAGATACTTATAGAAATTTGTGGAAAACAGACTACAGGTACAGTGTTAGTAGGACCTACACCTGTCAACATAATTGGACGAAATATATTGACTAARATTGGTTGTACTTTAAATTTTCCAATTAGTCCTGTTGACACTGTACCAGTAACATTAAAGCCAGGAATGGATGGACCAAAGGTCAAACAGTGGCCATTGACAGAARAAAAAATAAAAGCACTA…
303351_2017_AE	~~~~~~~~~~~~~~~TGGCAACGACCCGTTGTCACAGTAAGAATAGAAGGACAGCTGAAGGAAGCCCTATTAGATACAGGGGCAGATGATACAGTATTAGAAGATATAAATTTGCCAGGAAAATGGAAACCAAAAATGATAGGGGGAATTGGAGGTTTTATCAAAGTAAGGCAATATGATCAGATACTTATAGAAATTTGTGGAAAACAGACTACAGGTACAGTGTTAGTAGGACCTACACCTGTCAACATAATTGGACGAAATATATTGACTAAGATTGGTTGTACTTTAAATTTTCCAATTAGTCCTGTTGACACTGTACCAGTAACATTAAAGCCAGGAATGGATGGACCAAAGGTCAAACAGTGGCCATTGACAGAAGAAAAAATAAAAGCACTA…
303367_2017_AE	CCTCAAATCACTCTTTGGCAACGACCCCTTGTCACAATAAAAATAGGAGGGCAGCTGAAAGAAGCTCTATTAGATACAGGAGCAGATGATACAGTACTAGAAGATATAAATTTGCCAGGAAAATGGAAACCAAAAATGATAGGGGGAATTGGAGGTTTTATCAAAGTAAGGCAATATGATCAGATACTTATAGAAATTTGTGGAAAAAAGGCTATAGGTACAGTGTTAGTAGGACCTACACCTGTCAACATAATTGGACGGAATATGTTGACTCAGATTGGTTGTACTTTAAATTTTCCAATTAGTCCTATTGACACTGTACCAGTAACATTAAAGCCAGGAATGGATGGACCAAAGGTTAAACAATGGCCATTGACAGAAGAAAAAATAAAAGCATTA…
062021_2017_AE	CCTCAAATCACTCTTTGGCAACGACCCCTTGTCACAATAAAAATAGGAGGGCAGCTGAGAGAAGCTCTATTAGATACAGGAGCAGATGATACAGTATTAGAGGATATAGATTTGCCAGGAAAATGGAAACCAAAAATGATAGGGGGAATTGGAGGTTTTATCAAAGTAAGGCAATATGATCAGATACTTATAGAAATTTGTGGAAAAAGGGCTATAGGTACAGTATTAGTAGGACCTACACCTGTCAACATAATTGGACGAAATATGTTGACTCAGATTGGTTGTACTTTAAATTTTCCAATTAGTCCTATTGACACTGTACCTGTAACATTAAAGCCAGGAATGGATGGACCAAAGGTTAAACAGTGGCCATTGACAGAAGAAAAAATAAAAGCATTA…
062001_2017_AE	~~~~~~~~~~~~~~~TGGCAACGACCAGTAGTTATAATAAAAATAGAGGGACAGCTAAAAGAAGCTCTATTAGATACAGGAGCAGATGATACAGTATTAGAGGATATAAATTTGCCAGGAAAATGGAAACCAAAAATGATAGGGGGAATTGGAGGTTTTATCAAAGTAAGACAATATGATCAGATAATTATAGAAATTTGTGGAAAAAGGGCTATAGGTACAGTGTTGGTAGGACCYACACCTGTCAACATAATTGGACGAAATATGTTGACTCAGCTTGGTTGTACTTTAAATTTCCCAATTAGTCCTATTGACACTGTACCCGTAACATTAAAGCCAGGAATGGATGGACCAAAGGTTAAACAGTGGCCATTGACAGAAGAAAAAATAAAAGCATTA…
303395_2017_AE	~~~~~~~~~~~~~~~TGGCAGCGACCCATARTCACCATAAAAATAGGAGGACAGCTGAAAGAAGCTCTATTAGATACAGGAGCAGATGATACAGTATTAGAAGATATAGATTTGCCAGGAAAATGGAAACCAAAAATGATAGGGGGAATTGGAGGTTTTATCAAAGTAAGACAATATGAGCAGATAGTTATAGAAATKTGTGGAAAAAGGGCTATAGGTACAGTATTAGTAGGACCTACACCTATCAACATAATTGGACGAAATATGTTGACTCAGATTGGCTGTACTTTAAATTTTCCAATWAGTCCTATTGAAACTGTACCAGTAACATTAAAGCCAGGAATGGATGGACCAAAGGTTAAACAGTGGCCATTAACAGAARAAAAAATAAAAGCATTA…
303406_2017_AE	CCTCAAATCACTCTTTGGCAACGACCCCTTGTCACAATAAAAATAGAAGGACAGTTGAGAGAAGCTCTACTAGATACAGGAGCAGATGATACAGTATTAGAAGATATAAATTTGCCAGGAAAATGGAAACCAAAAATGATAGGGGGAATTGGAGGTTTTATCAAAGTWAGGCAATATGATCAGATACTTATAGAAATTTGTGGAAAAAAGGCTATAGGTACAGTGTTGGTAGGACCTACACCTGTCAACATAATTGGACGAAATATGTTGACTCAGCTTGGTTGTACTTTAAATTTCCCAATTAGTCCTGTTGACACTGTACCAGTAAAATTAAAGCCAGGAATGGATGGACCAAAGGTTAAACAGTGGCCATTGACAGAAGAAAAAATAAAAGCATTA…
071014_2017_AE	~~~~~~~~~~~~~~~TGGCAACGACCCGTTGTCACAGTAARAATAGAAGGACAGCTGAAAGAAGCTCTATTAGATACAGGAGCAGATGATACAGTATTAGAAGAGATAAATTTGCCAGGAAAATGGAAACCAAAAATGATAGGGGGAATTGGAGGTTTTATCAAAGTAAGGCAATATGATCAGATACGTATAGAAATTTGTGGAAAACAGGCTATAGGTACAGTGTTAGTAGGACCTACACCTGTCAACATAATTGGACGAAATATGTTGACTAAGATTGGTTGTACTTTAAATTTTCCAATTAGTCCTGTTGACACTGTACCAGTAACATTAAAGCCAGGAATGGATGGACCAAAGGTCAAACAGTGGCCATTGACAGAAGAAAAAATAAAAGCACTA…
303404_2017_AE	CCTCAAATCACTCTTTGGCAACGACCCCTTGTCACAATAAAAATAGAAGGACAGCTAAAAGAAGCTCTATTAGATACAGGAGCAGATGATACAGTATTAGAAGATATAAATTTGCCAGGAAAATGGAAACCCAAAATGATAGGGGGAATTGGAGGTTTTATCAAAGTAAGGCAATATGATCAAATAATGATAGAAATTTGTGGAAAAAAGGCTGTAGGTACAGTGTTGGTAGGACCTACACCTGTCAACATAATTGGACGAAATATGTTGACTCAGCTTGGTTGTATTTTAAATTTTCCAATTAGCCCTATTGACACTGTACCAGTAACATTAAAGCCAGGAATGGATGGACCAAGGGTTAAACAATGGCCATTGACAGAAGAAAAAATAAAAGCATTA…
303421_2017_AE	CCTCAAATCACTCTTTGGCAGCGACCCCTTGTCACAGTAAAAATAGGAGGACAGCTGAAAGAAGCTCTATTAGATACAGGAGCAGATGATACAGTATTAGAAGATATAAATTTGCCAGGAAAATGGAAACCAAAAATGATAGGGGGAATTGGAGGTTTTATCAAAGTAAGACAATATGATCAGATACTTATAGAAATTTGTGGAAAAAAGGCTATAGGTACAGTACTAGTAGGACCTACACCTGTCAACATAATTGGACGAAATATGTTGACTCAGATTGGTTGTACTTTAAACTTCCCAATTAGTCCTATTGACACTGTACCAGTAAAATTAAAGCCAGGAATGGATGGACCAAAGGTTAAACAGTGGCCATTGACAGAAGAAAAAATAAAAGCATTA…
303408_2017_AE	CCTCAAATCACTCTTTGGCARCGACCACTAGTCATAATAAAAGTAGAAGGACAGCTGAAAGAAGCTCTATTAGATACAGGAGCAGACGATACAGTATTAGAAGATATAAGTTTGCCAGGAAAATGGAAACCAAAAATGATAGGGGGAATTGGAGGGTTTATCAAAGTAAGACAATATGATCAGATACTTATAGAAATTTGTGGAAAAAAGGCTATAGGTACAGTATTAGTAGGACCTACACCTGTCAACATAATTGGACGAAATATGTTGACTCAGCTTGGTTGTACTTTAAATTTCCCAATTAGTCCTATTGACACTGTACCAGTAAAATTAAAGCCAGGAATGGATGGACCAAAGATTAAACAGTGGCCACTGACAGAAGAAAAAATAAAAGCATTA…
303417_2017_AE	CCTCAAATCACTCTTTGGCAACGACCCCTTGTCACAGTAAAAATAGGAGGACAGCTGAAAGAAGCTCTATTAGATACAGGAGCAGATGATACAGTATTAGAAGATATAGATTTGCCAGGAAAATGGAAACCAAAAATGATAGGGGGAATTGGAGGTTTTATCAAAGTAAGGCAATATGATCAGATATCTATAGAAATTTGTGGAAAAAAGGCTATAGGTACAGTGTTAGTAGGACCCACACCTGTCAACATAATTGGACGAAATATGTTGACCCAGATTGGTTGTACTTTAAATTTCCCAATTAGTCCTATTAACACTGTACCAGTAACATTAAAGCCAGGAATGGATGGACCAAAGGTTAAACAGTGGCCATTGACAGAAGAAAAGATAAAAGCATTA…
072508_2017_AE	~~~~~~~~~~~~~~~TGGCAACGACCCCTTGTCACAATAAAAATAGGGGGACAGCTAAGAGAAGCTCTATTAGATACAGGAGCAGATGATACAGTATTAGAAGATATAAATTTGCCAGGAAAATGGAAACCAAAAATGATAGGGGGAATTGGAGGTTTTATCAAAGTAAGGCAATATGATCAGATACCTATAGAAATTTGTGGRAAAAAGGCTATAGGTACAGTRTTAGTAGGACCTACACCTGTCAACATAATTGGACGAAATATGTTGACTCAGCTTGGTTGTACTTTAAATTTCCCAATTAGTCCTATTGACACTGTACCAGTAACATTAAAGCCAGGAATGGATGGACCAAAGGTTAAACAGTGGCCATTGACAGAAGAAAAAATAAAAGCATTA…
080813_2017_AE	~~~~~~~~~~~~~~~TGGCAACGACCCCTTGTCACAATAAAAATAGGAGGACAGCTGAAAGAAGCTCTATTAGATACAGGAGCAGATGATACAGTATTAGAAGATATAAATTTGCCAGGAAAATGGAAACCAAAAATGATAGGGGGAATTGGAGGTTTTATCAAAGTAAGGCAATATGATCAGATACAGATAGAAATTTGTGGAAAAAAGGCTATAGGTACAGTGTTAGTAGGACCTACACCTGTCAACATAATTGGACGAAATATGTTGACTCAGATTGGTTGTACTTTAAATTTTCCAATTAGTCCTATTAACCCTGTACCAGTAACATTAAARCCAGGAATGGATGGGCCAAAGGTTAAACAGTGGCCATTGACAGAAGAAAAAATAAAAGCATTA…
081508_2017_AE	~~~~~~~~~~~~~~~TGGCAACGACCCCTTGTCCCAATAAAAATAGGAGGACAGCTGAAAGAAGCTCTATTAGATACAGGAGCAGATGATACAGTGTTAGAAGATATAAATTTACCAGGAAAATGGAAACCAAAAATGATAGGGGGAATTGGAGGTTTTATCAAAGTAAGGCAATATGATCAGATACTTATAGAAATTTGTGGGAAAAAGGCTATAGGTACAGTGTTGGTAGGACCTACACCTGTCAACATARTTGGACGAAATATGTTAACTCAGCTTGGTTGTACTTTAAATTTTCCAATTAGTCCTATTGACACTGTACCAGTAACATTAAAGCCAGGAATGGATGGACCAAAGGTTAAACAGTGGCCATTGACAGAAGAAAAAATAAAAGCATTA…
303467_2017_AE	CCTCAAATCACTCTTTGGCAACGACCCCTTGTCACAATAAAAATAGGAGGACAGCTAAGAGAAGCTCTATTAGATACAGGAGCAGATGATACAGTATTAGAAGATATAAATTTACCAGGAAAATGGAAACCAAAAATGATAGGGGGAATTGGAGGTTTTATCAAAGTAAGGCAATATGATCAGATACCTATAGAAATTTGTGGACAGAAGGCTATAGGCACAGTGTTAGTAGGACCTACACCTGTCAACATAATTGGACGAAATATGCTGACCCAGATTGGTTGTACTTTAAATTTCCCAATTAGTCCTATTGACACTGTACCAGTAACATTAAAGCCAGGAATGGATGGACCAAAGGTTAAACAGTGGCCATTGACAGAAGAAAAAATAAAAGCATTA…
082208_2017_AE	~~~~~~~~~~~~~~~TGGCAACGACCCCTTGTCACAATAAAAATAGGAGGGCAGCTGAGAGAAGCTCTATTAGATACAGGAGCAGATGATACAGTATTAGAGGATATAGATTTGCCAGGAAAATGGAAACCAAAAATGATAGGGGGAATTGGAGGTTTTATCAAAGTAAGGCAATATGATCAGATACTTATAGAAATTTGTGGAAAAAGGGCTATAGGTACAGTATTAGTAGGACCTACACCTGTCAACATAATTGGACGAAATATGTTGACTCAGATTGGTTGTACTTTAAATTTTCCAATTAGTCCTATTGACACTGTACCTGTAACATTAAAGCCAGGAATGGATGGACCAAAGGTTAAACAGTGGCCATTGACAGAAGAAAAAATAAAAGCMTTA…
303458_2017_AE	CCTCAAATCACTCTTTGGCAACGACCCCTTGTCACAATAAAAATAGGAGGACAGCTGAAAGAAGCTCTATTAGATACAGGAGCAGATGATACAGTATTAGAAGATATAAATTTGCCAGGGAAATGGAAACCAAAAATGATAGGGGGAATTGGAGGTTTTATCAAAGTAAGGCAATATGATCAGRTACTTATAGAAATTTGTGGAAAAAAGGCTATAGGTACAGTGTTAGTAGGACCTACACCTATCAACATAATTGGAMGAAATATGTTGACTCAGATTGGTTGTACATTAAATTTCCCAATTAGTCCTATTGACACTGTACCAGTYACATTAAAACCAGGAATGGATGGACCAAAGGTTAAACAGTGGCCATTGACAGAAGAAAAAATAAAAGCATTA…
322963_2017_AE	CCTCAAATCACTCTTTGGCAACGACCCCTTGTCACAATAAAAATAGGAGGACAGCTAAAAGAAGCTCTATTAGATACAGGAGCAGATGATACAGTATTAGAAGATATAAATTTGCCAGGAAAATGGAAACCAAAAATGATAGGGGGAATTGGAGGTTTTATCAAGGTAAGGCAATATGATCAGATAACTATAGAAATTTGTGGGAAAAAGGCTACAGGTACAGTATTAGTGGGACCTACACCTATCAACATAATTGGACGGAATATGTTGACTCAGCTTGGTTGTACTTTAAATTTCCCAATTAGTCMTATTGAWACTGTACCAGTAAMATTAAAGCCAGGAATGGATGGGCCAAAGGTTAAACAGTGGCCATTGACAGAAGAAAAAATAAAAGCATTA…
322971_2017_AE	CCTCAAATCACTCTTTGGCAACGACCCCTTGTCACAGTAAGAATAGAAGGACAGCTGAAAGAAGCTCTATTAGATACAGGAGCAGATGATACAGTATTAGAAGATATAAATTTGCCAGGAAAATGRAAACCAAAAATGATAGGGGGAATTGGAGGCTTTATTAAAGTAAGACAATATGATCAGATACTTATAGAAATTTGTGGGAAAAGGGCGATAGGTACAGTGTTGGTAGGACCTACACCTGTCAACATAATTGGACGAAATATGCTGACTCAGATTGGTTGTACTTTAAATTTTCCAATTAGTCCTATTAACACTGTACCAGTAAAATTAAAGCCAGGAATGGATGGACCAAAGGTTAAACAGTGGCCATTGACAGAGGAAAAAATAAAAGCATTG…
082913_2017_AE	~~~~~~~~~~~~~~~TGGCAACGACCCCTTGTCACAATAAARATAGGAGGACAGTTGAGAGARGCTCTACTAGATACAGGAGCAGATGATACAGTATTAGAAGATATAAATTTGCCAGGAAAATGGAAACCAAAAATGATAGGGGGAATTGGGGGTTTTATCAAGGTAAGGCAATATGATCAGATACTTATAGAAATTTGTGGAAAAARGGCTATAGGTACAGTGTTGGTAGGACCTACACCTATCAACATAATTGGACGAAATATGTTGACTCAACTTGGKTGYACTTTAAATTTCCCAATTAGTCCTATTGACACTGTACCAGTAACATTAAAGCCAGGAATGGATGGACCAAAGGTTAAACAGTGGCCATTGACAGAAGAAAAAATAAAAGCATTA…
082916_2017_AE	~~~~~~~~~~~~~~~TGGCAACGACCCCTTGTCACAATAAARATAGGAGGACAGTTGAGAGARGCTCTACTAGATACAGGAGCAGATGATACAGTATTAGAAGATATAAATTTGCCAGGAAAATGGAAACCAAAAATGATAGGGGGAATTGGGGGTTTTATCAAGGTAAGGCAATATGATCAGATACTTATAGAAATTTGTGGAAAAARGGCTATAGGTACAGTGTTGGTAGGACCTACACCTATCAACATAATTGGACGAAATATGTTGACTCAACTTGGKTGYACTTTAAATTTCCCAATTAGTCCTATTGACACTGTACCAGTAACATTAAAGCCAGGAATGGATGGACCAAAGGTTAAACAGTGGCCATTGACAGAAGAAAAAATAAAAGCATTA…
303514_2017_AE	CCTCAAATCACTCTTTGGCAACGACCCCTTGTCACAATAAAAATAGGAGGACAGCTAAGAGAAGCTCTATTAGATACAGGAGCAGATGATACAGTATTAGAAGATATAAATTTGCCAGGAAAATGGAAACCAAAAATGATAGGGGGAATTGGAGGTTTTATCAAGGTAAGGCAATATGATCAGATACCTATAGAAATTTGTGGAAAAAAGGCTATAGGTACAGTGTTAGTAGGACCTACACCTGTCAACATAATTGGACGAAATCTGTTGACTCAGCTTGGTTGTACTTTAAATTTCCCAATTAGTCCTATTGACACTGTACCAGTAACATTAAAGCCAGGAATGGATGGACCAAAGGTTAAACAGTGGCCATTGACAGAAGAAAAAATAAAAGCATTA…
303486_2017_AE	~~~~~~~~~~~~~~~TGGCAACGACCCCTTGTCACAATAAAAATAGGAGGAGAGCTAAGAGAAGCTCTATTAGATACAGGAGCAGATGATACAGTATTAGAAGATATAAATTTGCCAGGAAAATGGAAACCAAAAATGATAGGGGGAATTGGAGGTTTTATCAAAGTAAGACAATATGATCAGATAGCTATAGAAATTTGTGGAAAAAGGGCTGTAGGTACAGTGTTAGTAGGACCTACACCTGTCAACATAATTGGGCGAAATATGTTGACTCAGCTTGGTTGTACTTTAAATTTCCCAATTAGTCCTATTGACACTGTACCAGTAACATTAAAGCCAGGAATGGATGGACCAAAGGTTAAACAGTGGCCATTGACAGAAGAAAAAATAAAAGCATTA…
303495_2017_AE	CCTCAAATCACTCTTTGGCAACGACCCCTCGTCACAGTAAAAATAGGAGGACAGCTGAAAGAAGCTCTATTAGATACAGGAGCAGATGATACAGTATTAGAAGATATAAATTTACCAGGAAAATGGAAACCAAAAATGATAGGGGGAATTGGAGGGTTTATCAAAGTAAGGCAATATGATCAGATACTTATAGAAATTTGTGGAAAAAGGGCTATAGGTACAGTGTTAGTAGGACCTACACCTGTCAACATAATTGGACGAAATATGTTGACTCAGATTGGTTGTACTTTAAATTTTCCAATTAGTCCTATTGACACTGTACCAGTAACATTAAAGCCAGGAATGGATGGGCCAAAGGTTAAACAGTGGCCATTAACAGAAGAAAAAATAAAAGCATTA…
092616_2017_AE	~~~~~~~~~~~~~~~TGGCAACGACCAGTAGTTATAATAAAAATAGAGGGACAGCTAAAAGAAGCTCTATTAGATACAGGAGCAGATGATACAGTATTAGAGGATATAAATTTGCCAGGAAAATGGAAACCAAAAATGATAGGGGGAATTGGAGGTTTTATCAAAGTAAGACAATATGATCAGATAATTATAGAAATTTGTGGAAAAAGGGCTATAGGTACAGTGTTGGTAGGACCCACACCTGTCAACATAATTGGACGAAATATGTTGACTCAGCTTGGTTGTACTTTAAATTTCCCAATTAGTCCTATTGACACTGTACCAGTAACATTAAAGCCAGGAATGGATGGACCAAAGGTYAAACAGTGGCCATTGACAGAAGAAAAAATAAAAGCATTA…
303537_2017_AE	CCTCAAATCACTCTTTGGCAACGACCCCTTGTCACAATAAAAATAGGAGGACAGCTAAGAGAAGCTCTATTAGATACAGGAGCAGATGATACAGTATTAGAAGATATAAATTTGCCAGGAAAATGGAAACCAAAAATGATAGGGGGAATTGGAGGTTTTATCAAGGTAAGGCAATATGATCAGATACCCATAGAAATTTGTGGAAAAAAGGCTATAGGTACAGTGTTAGTAGGACCTACACCTGTCAACATAATTGGACGAAATATGTTGACTCAGCTTGGTTGTACTTTAAATTTCCCAATTAGTCCTGTTGACACTGTACCAGTAACATTAAAGCCAGGAATGGATGGACCAAAAGTTAAACAGTGGCCATTGACAGAAGAAAAAATAAAAGCATTA…
130044_2017_AE	~~~~~~~~~~~~~~~TGGCAACGACCCCTTGTCACAGTAAAAGTAGAAGGACAGTTGAGAGAAGCTCTATTAGATACAGGAGCAGATGATACAGTRTTAGAAGATATAAATTTGCCAGGAAAATGGAAACCAAAAATGATAGGGGGAATTGGAGGGTTTATCAAAGTAAGACAATATGATCARATACTTATAGAAATTTGTGGAAAAAAGGCTATAGGTACAGTATTAGTAGGACCTACACCTGTCAACATAATTGGACGAAATATGTTGACTCAACTCGGTTGTACTTTAAATTTTCCAATTAGTCCTATTGACACTGTACCAGTAACATTAAAGCCAGGAATGGATGGACCAAAGGTTAAACAGTGGCCATTAACAGAAGAAAAAATAAAAGCATTA…
303575_2017_AE	CCTCAAATCACTCTTTGGCAACGACCACTAGTCACAATAAAAGTAGGAGGGCAGCTGAAAGAAGCTCTATTAGATACAGGAGCAGATGATACAGTATTAGAAGATATAAATTTGCCAGGAAAATGGAAACCAAAAATGATAGGGGGAATTGGAGGTTTTATCAAAGTAAGGCAATATGATCAGATACTTATAGAAATTTGTGGAAAAAAGGCTGTAGGTACAGTGTTAGTAGGACCTACACCTGTCAACATAATTGGACGAAATATGTTGACCCAGATTGGTTGTACTTTAAATTTTCCAATTAGTCCTATTGACACTGTACCAGTAACATTAAAACCAGGAATGGATGGACCAAAGGTTAAACAGTGGCCATTGACYGAAGAAAAAATTAAAGCATTA…
303552_2017_AE	CCTCAAATCACTCTTTGGCAACGACCCGTTGTCGCAGTAAGAATAGAAGGGCAGCTGAAAGAAGCCCTATTAGATACAGGGGCAGATGATACAGTATTAGAAGATATAAATCTGCCAGGAAAATGGAAACCAAAAATGATAGGGGGAATTGGAGGTTTTATTAAAGTAAGGCAATATGATCAGATACTTATAGAAATTTGTGGAAAACAGGTTAAAGGTACAGTGTTAGTAGGACCTACACCTGTCAACATAATTGGACGAAATATGTTGACTCAACTTGGTTGTACTTTAAATTTTCCAATTAGTCCTGTTGACACTGTACCAGTAACATTAAAGCCAGGAATGGATGGACCAAAGGTCAAACAGTGGCCGTTGACAGAAGAAAAAATAAAAGCACTA…
303557_2017_AE	CCTCAAATCACTCTTTGGCAGCGACCCCTCGTTACAATAAAAATAGAAGGACAGCTAAAAGAAGCTCTATTAGACACAGGAGCAGATGATACAGTATTAGAAGATATAAATTTGCCAGGAAAATGGAAACCAAAAATGATAGGGGGAATTGGAGGTTTTATCAAAGTAAGGCAATATGATCAGATACTTATAGAAATTTGTGGAAAAAGGGCTATAGGAACAGTGTTAGTAGGACCTACACCTGTCAACATAATTGGACGAAATATGTTGACTCAGATTGGTTGTACTTTAAACTTCCCAATTAGTCCTATTGACACTGTACCAGTAACATTAAAGCCAGGAATGGATGGACCAAAGGTTAAACAGTGGCCATTGACAGAAGARAAAATAAAAGCATTA…
303542_2017_AE	CCTCAAATCACTCTTTGGCAACGACCCCTTGTCACAATAAAAATAGGAGGACAGCTAAGAGAAGCTCTATTAGATACAGGAGCAGATGATACAGTATTAGAAGATATAAATTTACCAGGAAAATGGAAACCAAAAATGATAGGGGGAATTGGAGGTTTTATCAAAGTAAGGCAATATGATCAGATACCTATAGAAATTTGTGGACAGAAGGCTATAGGTACAGTGTTAGTAGGACCTACACCTGTCAACATAATTGGACGAAATATGCTGACCCAGATTGGTTGTACTTTAAATTTCCCAATTAGTCCTATTGACACTGTACCAGTAACATTAAAGCCAGGAATGGATGGACCAAAGGTTAAACAGTGGCCATTGACAGAAGAAAAAATAAAAGCATTA…
303548_2017_AE	CCTCAAATCACTCTTTGGCAACGACCCCTTGTCACAATAAAAATAGGAGGACAGCTGAAAGAAGCTCTATTAGATACAGGAGCAGATGATACAGTATTAGAAGATATAAATTTACCAGGAAAATGGAAACCAAAAATGATAGGGGGAATTGGAGGTTTTATCAAAGTAAGGCAATATGATCAGATACTTATAGAAATTTGTGGAAAAAAGGCTATAGGTACAGTGTTAGTAGGACCTACACCTGTCAACATAATTGGACGAAATATGTTGACTCAGATTGGTTGTACTTTAAATTTCCCAATTAGTCCTGTTGAAACTGTACCAGTAACATTAAAGCCAGGAATGGATGGACCAAAGGTTAAACAGTGGCCATTGACAGAAGAAAAAATAAAAGCATTA…
103113_2017_AE	~~~~~~~~~~~~~~~TGGCAACGACCCCTTGTCACAATAAAAATAGAAGGACAACTAAGAGAAGCTCTATTAGATACAGGAGCAGATGACACAGTATTAGAAGATATAAATTTGCCAGGAAAATGGAAACCAAAAATGATAGGGGGAATTGGAGGTTTTATCAAAGTAAGGCAATATGATCAGATAGCTATAGAAATTTGTGGAAAAAAGGCTATAGGTACAGTGTTACTAGGACCTACACCTATCAACATAATTGGACGAAATATGTTGACTCAGCTTGGTTGTACTTTAAATTTCCCAATTAGTCCTATTGACACTGTACCAGTAACATTAAAGCCAGGAATGGATGGACCAAAGGTTAAACAGTGGCCATTGACAGAAGAAAAAATAAAAGCATTA…
110713_2017_AE	~~~~~~~~~~~~~~~TGGCAACGACCCCTTGTCACAGTAAAAGTAGRAGGACAGTTGAGAGAAGCYCTATTAGATACAGGAGCAGATGATACAGTATTAGAAGATATAAATTTGCCAGGAAAATGGAAACCAAAAATGATAGGGGGAATTGGAGGTTTTATCAAAGTRAGACAATATGATCAGATACTTATAGAAATTTGTGGAAAAAGGGCTATAGGTACAGTATTAGTAGGACCTACACCTGTCAACATAATYGGACGAAATATGTTGACTCAACTCGGTTGTACTTTAAATTTTCCAATTAGTCCTATTGACACTGTACCAGTAACATTAAAGCCAGGAATGGATGGACCAAAGGTYAAACAGTGGCCATTAACAGAAGAAAAAATAAAAGCATTA…
303580_2017_AE	CCTCAAATCACTCTTTGGCAACGACCCCTTGTCACAATAAAAATAGGAGGACAGCTAAGAGAAGCTCTATTAGATACAGGAGCAGATGATACAGTATTAGAAGATATAAATTTGCCAGGAAAATGGAAACCAAAAATGATAGGGGGAATTGGAGGTTTTATCAAGGTAAGGCAATATGATCAGATACCTATAGAAATTTGTGGAAAAAAGGCTATAGGTACAGTGTTAGTAGGACCTACACCTGTCAACATAATTGGACGAAATCTGTTGACTCAGCTTGGTTGTACTTTAAATTTCCCAATTAGTCCTATTGACACTGTACCAGTAACATTAAAGCCAGGAATGGATGGACCAAAGGTTAAACAGTGGCCATTGACAGAAGAAAAAATAAAAGCATTA…
303585_2017_AE	CCTCAAATCACTCTTTGGCAACGACCCCTTGTCACAATAAAAATAGGAGGACARCTAAGAGAAGCTCTATTAGATACAGGAGCAGATGATACAGTATTAGAAGATATAAATTTGCCAGGAAAATGGAAACCAAAAATGATAGGGGGAATTGGAGGTTTCATCAAGGTAAGACAATATGATCAGATATCTATAGAAATTTGTGGAAAGAAGGCTATAGGTACAGTRTTAGTAGGACCTACACCTGTCAACATAATTGGACGAAATATGTTGACTCAGATTGGTTGTACTTTAAATTTCCCAATTAGTCCTATTGACACTGTACCAGTAACATTAAAGCCAGGAATGGATGGACCAAAGGTTAAACAGTGGCCATTGACAGAAGAAAAAATAAAAGCATTA…
303576_2017_AE	CCTCAAATCACTCTTTGGCAACGACCCCTTGTCACAATAAAAATAGGAGGACAGCTAAAAGAAGCTCTATTAGATACAGGAGCAGATGATACAGTATTAGAAGATATAAATTTGCCAGGAAAATGGAAACCAAAAATGATAGGGGGAATTGGAGGTTTTATCAAGGTAAGGCAATATGATCAGATAACTATAGAAATTTGTGGGAAAAAGGCTACAGGTACAGTATTAGTGGGACCTACACCTGTCAACATAATTGGACGGAATATGTTGACTCAGCTTGGTTGTACTTTAAATTTCCCAATTAGTTCTATTGACACTGTACCAGTAACATTAAAGCCAGGAATGGATGGGCCAAAGGTTAAACAGTGGCCATTGACAGAAGAAAAAATAAAAGCATTA…
111406_2017_AE	~~~~~~~~~~~~~~~TGGCAACGACCCCTTGTCACAATAAAAATAGCAGGACAGCTGAAAGAAGCTCTATTAGACACAGGAGCAGATGATACAGTATTAGAAGATATAAATTTRCCAGGAAAATGGAAACCAAAAATGATAGGGGGAATTGGAGGTTTTATCAAAGTAAGGCAATATGATCAGATACTTATAGAAATTTGTGGAAAAAGGGCTATAGGTTCAGTATTAGTAGGACCTACACCAGTCAACATAATTGGGCGAAATATGTTGACTCAGCTTGGTTGTACTTTAAATTTCCCAATTAGTCCTATTGACACTGTACCAGTAACATTAAAGCCAGGAATGGATGGACCAAAGGTTAAACAGTGGCCATTAACAGAAGAAAAAATAAAAGCATTA…
322698_2017_AE	CCTCAAATCACTCTTTGGCAACGACCCCTTGTCACAATAAAAATAGGAGGACAGCTAAGAGAAGCTCTATTAGATACCGGAGCAGATGATACAGTATTAGAAGATATAAATTTGCCAGGAAAATGGAAACCAAAAATGATAGGGGGAATTGGAGGTTTTATCAAGGTAAGGCAATATGATCAGATACCTATAGAAATTTGTGGAAAAAAGGCTATAGGTACAGTGTTAGTAGGACCTACACCTGTCAACATAATTGGACGAAATCTGTTGACTCAGCTTGGTTGTACTTTAAATTTCCCAATTAGTCCTATTGACACTGTACCAGTAACATTAAAGCCAGGAATGGATGGACCAAAGGTTAAACAGTGGCCATTGACAGAAGAAAAAATAAAAGCATTA…
112108_2017_AE	cctcaaatcactctttggcaacgaccccttgtcacagtaaaaataggaggacagttgaragacgctctactagatacaggagcagatgatacagtattagaaratataaatttgccaggaaaatggaaaccaaaaatgatagggggaattggaggttttatcaaagtaaggcaatatgatcagatacttatagaaatttgtggaaaaaaggctataggtacagtgttggtaggacctacacctgtcaacataattggacgaaatatgttgactcagattggttgtactttaaatttcccaattagtcctattgacactgtaccagtaacattaaagccaggaatggatggaccaaaggttaaacagtggccattgacagaagaaaaaataaaagcatta…
303597_2017_AE	CCTCAAATCACTCTTTGGCAACGACCCCTTGTCTCAATAAAAATAGGGGGACAGMTAAGAGAAGCTCTATTAGATACAGGAGCAGATGATACAGTATTAGAAGATATAGATTTGCCAGGAAAATGGAAACCAAAAATGATAGGGGGAATTGGAGGTTTTATCAARGTAAGGCAATATGATCAGATACCTATAGAAATTTGTGGAAAAAGGGCTATAGGTACAGTGTTARTAGGACCTACACCTGTCAACATAATTGGACGAAATATGTTGACTCAGCTTGGTTGTACTTTAAATTTTCCAATTAGTCCTATTGACACTGTACCAGTAACATTAAAGCCAGGAATGGATGGACCAAAGGTTAAACAGTGGCCATTGACAGAAGAAAAAATAAAAGCATTA…
303607_2017_AE	cctcaaatcactctttggcaacgaccccttgtcacaataaaaataggaggacagataagagaagctctattagatacaggagcagatgatacagtattagaagatataaatttgccaggaaaatggaagccaaaaatgatagggggaattggaggttttatcaaggtaaggcaatatgatcagatacctatagaaatttgtgaaaaaaaggctataggtacagtattagtaggacctacacctgtcaacataattggacgaaatatgttgactcagcttgggtgtactttaaatttcccaattagtcctattgacactataccagtaacattaaagccaggaatggatggaccaaaggttaaacagtggccattgacagaagaaaaaataaaagcatta…
112817_2017_AE	~~~~~~~~~~~~~~~TGGCAACGACCCCTTGTCACAATAAAAATAGGGGGACAGCTAAGAGAGGCTCTATTAGATACAGGAGCAGATGATACAGTATTTGRAGAGRTAAATTTGACAGGAAAATGGAAACCAAAAATGATAGGGGGAATTGGAGGTTTTATTAAAGTAAGGCAATATGATCAGATACCTATAGAAATTTGTGGAAAAARGGCTATAGGTACAGTGTTAGTAGGACCTACACCTGTCAACATAATTGGAAGGAATATGTTGACTCAGCTTGGTTGTACTTTAAATTTCCCAATTAGTCCTATTGAAACTGTACCAGTAAAATTAAAGCCAGGAATGGATGGACCAAAGGTTAAACAGTGGCCATTGACAGAAGAAAAAATAAAAGCATTA…
112818_2017_AE	~~~~~~~~~~~~~~~TGGCAACGACCCATTGTCACAATAAAAGTAGGGGGACAACTGAGAGAAGCTCTATTAGATACAGGAGCAGATGATACAGTATTAGAAGATATAAATTTGCCAGGAAAATGGAAACCAAAAATGATAGGGGGAATTGGAGGTTTTATCAAAGTAAGGCAATATGATCAGATAATGATAGAAATTTGTGGAAAAAAGGCTATAGGTACAGTGTTAGTAGGGCCTACACCTGTCAATATAATTGGACGAAATATGTTGACTCAGATTGGCTGTACTTTGAATTTACCAATTAGTCCTATTGACACTGTACCAGTAAAATTAAAGCCAGGAATGGATGGACCAAGGGTTAAACAGTGGCCATTGACAGAAGAAAAAATAAAAGCATTA…
303613_2017_AE	CCTCAAATCACTCTTTGGCAACGACCCCTTGTCACAATAAGAATAGGAGGAGAGCTAAGAGAAGCTCTATTAGATACAGGAGCAGATGATACAGTATTAGAAGATATAAATTTGCCAGGAAAATGGAAACCAAAAATGATAGGGGGAATTGGAGGTTTTATCAAAGTAAGACAATATGATCAGATAGCTATAGAAATTTGTGGAAAAAGGGCTGTAGGTACAGTGTTAGTAGGACCTACACCTGTCAACATAATTGGGCGAAATATGTTGACTCAGCTTGGTTGTACTTTAAATTTCCCAATTAGTCCTATTGACACTGTACCAGTAACATTAAAGCCAGGAATGGATGGACCAAAGGTTAAACAGTGGCCATTGACAGAAGAAAAAATAAAAGCATTA…
323062_2017_AE	CCTCAAATCACTCTTTGGCAACGACCCATTGTCACAGTAAAAATAGAGGGACAACTAAAAGAAGCTCTATTAGATACAGGAGCAGATGATACAGTATTAGAAGATATAAATTTGCCAGGAAAATGGAAACCAAAAATGATAGGGGGAATTGGAGGTTTTATTAAGGTAAGGCAATATGATCAAATACTTATAGAAATTTGTGGGAAAAGGGCTATAGGTACAGTATTAGTAGGACCTACACCTGTCAACATAATTGGACGAAATATGTTGACTCAAATTGGTTGTACTTTAAATTTCCCCATTAGTCCTATTAACACTGTACCAGTAAAATTAAAGCCAGGAATGGACGGGCCAAAGGTTAAACAGTGGCCATTGACAGAAGAAAAAATAAAAGCATTA…
303617_2017_AE	CCTCAAATCACTCTTTGGCAACGACCAGTAGTTATAATAAAAATAGAGGGACAGCTAAAAGAAGCTCTATTAGATACAGGAGCAGATGATACAGTATTAGAGGATATAAATTTGCCAGGAAAATGGAAACCAAAAATGATAGGGGGAATTGGAGGTTTTATCAAAGTAAGACAATATGATCAGATAATTATAGAAATTTGTGGAAAAAGGGCTATAGGTACAGTGTTGGTAGGACCCACACCTGTCAACATAATTGGACGAAATATGTTGACTCAGCTTGGTTGTACTTTAAATTTCCCAATTAGTCCTATTGACACTGTACCAGTAACATTAAAGCCAGGAATGGATGGACCAAAGGTTAAACAGTGGCCATTGACAGAAGAAAAAATAAAAGCATTA…
120523_2017_AE	~~~~~~~~~~~~~~~TGGCAACGACCCATTGTCACAATAAAAGTAGGGGGACAACTGAGAGAAGCTCTATTAGATACAGGAGCAGATGATACAGTATTAGAAGATATAAATTTGCCAGGAAAATGGAAACCAAAAATGATAGGGGGAATTGGAGGTTTTATCAAAGTAMGGCAATATGATCAGATAATGATAGAAATTTGTGGAAAAMAGGCTATAGGTACAGTGTTAGTAGGGCCTACACCTGTCAATATAATTGGACGAAATATGTTGACTCAGATTGGCTGTACTTTGAATTTACCAATTAGTCCTATTGACACTGTACCAGTAAAATTAAAGCCAGGAATGGATGGACCAAGGGTTAAACAGTGGCCATTGACAGAAGAAAAAATAAAAGCATTA…
120522_2017_AE	~~~~~~~~~~~~~~~TGGCAACGACCCCTTGTCACAATAAAAATAGGGGGACAGCTAAGAGAGGCTCTATTAGATACAGGAGCAGATGATACAGTATTTGRAGAGRTAARTTTGAYAGGAAAATGGAAACCAAAAATGATAGGGGGAATTGGAGGTTTTATTAAAGTAAGGCAATATGATCAGATACCTATAGAAATTTGTGGAAAAAGGGCTATAGGTACAGTGTTAGTAGGACCTACACCTGTCAACATAATTGGAAGGAATATGTTGACTCAGCTTGGTTGTACTTTAAATTTCCCAATTAGTCCTATTGAAACTGTACCAGTAAAATTAAAGCCAGGAATGGATGGACCAAAGGTTAAACAGTGGCCATTGACAGAAGAAAAAATAAAAGCATTA…
120507_2017_AE	cctcaaatcactctttggcaacgaccccttgtcacagtaaaagtaggaggacagttgagagaagctctattagatacaggagcagatgatacagtattagaagatatagatttaccaggaaaatggaaaccaaaaatgatagggggaattggaggttttatcaaagtaagacartatgatcagatacttatagaaatttgtggaaaaagggctataggtacagtattagtaggacctacacctgtcaacataattggacgaaatatgttgactcaacttggctgtactttaaattttccaattagtcctattgacactgtaccagtaaaattaaagccaggaatggatggaccaaaggttaaacartggccattaacagaagaaaaaataaaagcatta…
303638_2017_AE	CCTCAAATCACTCTTTGGCAACGACCCCTCGTCACAATAAAGATAGGAGGACAGGTGAAAGAAGCTCTATTAGATACAGGAGCAGATGACACAGTCTTAGAAGATATAAATTTACCAGGAAAATGGAAACCAAAGATGATAGGGGGAATTGGAGGTTTTATCAAAGTAAGGCAATATGATCAGGTACTTATAGAAATTTGTGGAAAAAAGGCTATAGGTACAGTGTTGGTAGGACCTACACCTGTCAACATAATTGGACGAAATATGTTGACTCAGATTGGTTGTACTTTAAATTTTCCAATTAGTCCTATTAACACTGTACCAGTAACATTAAAGCCAGGAATGGATGGACCAAAGGTTAAACAATGGCCATTGACAGAAGAAAAAATAAAAGCATTA…
303644_2017_AE	CCTCAAATCACTCTTTGGCAGCGACCCCTTGTCACAGTAAAAGTAGAAGGACAGTTGAGAGAAGCTCTACTAGATACAGGAGCAGATGATACAGTATTAGAAGATATAAATTTGCCAGGAAAATGGAAACCAAAAATGATAGGGGGAATTGGAGGTTTTATCAAAGTAAGGCAATATGATCAGATATCTATAGAAATTTGTGGAAAAAAGGCTATAGGTACAGTGTTGGTAGGACCTACACCTGTCAACATAATTGGACGAAATATGTTGACTCAGCTTGGTTGTACTTTAAATTTCCCAATTAGTCCTATTGACACTGTACCAGTAACATTAAAGCCAGGAATGGATGGACCAAAGGTTAAACAGTGGCCATTGACAGAAGAAAAAATAAAAGCATTA…
303633_2017_AE	CCTCAAATCACTCTTTGGCAACGACCAGTAGTTATAATAAAAATAGAGGGACAGCTAAAAGAAGCTCTATTAGATACAGGAGCAGATGATACAGTATTAGAGGATATAAATTTGCCAGGAAAATGGAAACCAAAAATGATAGGGGGAATTGGAGGTTTTATCAAAGTAAGACAATATGATCAGATAATTATAGAAATTTGTGGAAAAAGGGCTATAGGTACAGTGTTGGTAGGACCCACACCTGTCAACATAATTGGACGAAATATGTTGACTCAGCTTGGTTGTACTTTAAATTTCCCAATTAGTCCTATTGACACTGTACCAGTAACATTAAAGCCAGGAATGGATGGACCAAAGGTTAAACAGTGGCCATTGACAGAAGAAAAAATAAAAGCATTA…
121901_2017_AE	CCTCAAATCACTCTTTGGCAACGACCCCTTGTCACAGTAAAAATAGGAGGACAGCTGAAAGAAGCTCTATTAGATACAGGAGCAGATGATACAGTATTAGAAGATATAAATTTGCCAGGAAAATGGAMACCAAAAATGATAGGGGGAATTGGAGGTTTTATCAAAGTAAGACAATATGATCAGGTACCTATAGAAATTTGTGGAAAAAGGGCTATAGGTACAGTGTTAGTAGGACCTACACCTGTCAACATAATTGGACGAAATATGTTGACTCAGATTGGTTGTACTTTAAATCTTCCAATTAGTCCTATTGACACTGTACCAGTAACATTAAAGCCAGGAATGGATGGACCAAAAGTTAAACAGTGGCCATTGACAGAAGAAAAAATAAGAGCATTA…
303137_2017_AE	CCTCAAATCACTCTTTGGCAGCGACCCCTTGTCACAATAAAAATAGGAGGACAGCTGAAAGAAGCTCTATTAGATACAGGAGCAGATGATACAGTATTAGAAGATATAAATTTACCAGGAAAATGGAAACCAAAAATGATAGGGGGAATTGGAGGTTTTATCAAAGTAAAGCAATATGATCAAATACTTATAGAAATTTGTGGAAAAAAGGCTATAGGTACAGTTTTAGTAGGACCTACACCTGTCAACATAATTGGACGAAATATGTTGACTCAGATTGGTTGTACTTTAAACTTTCCAATTAGTCCTATTAACACTGTACCAGTAACATTAAAGCCAGGAATGGATGGACCAAAGGTTAAACAGTGGCCATTGACAGAAGAAAAAATAAAAGCATTA…
303164_2017_AE	CCTCAAATCACTCTTTGGCAACGACCCCTTGTCACAATAAAAATAGAAGGACAGCTAAAAGAAGCTCTATTAGATACAGGAGCAGATGATACAGTATTAGAAGATATAAATTTGCCAGGAAAATGGAAACCAAAAATGATAGGGGGAATTGGAGGTTTTATCAAAGTAAAGCAATATGATSAGAYAAYTATAGAAATTTGTGGAAAAAGGGCTATAGGTACAGTRTTAGTAGGACCTACACCTGTCAACATAATTGGACGAAATATGTTGACTCAGCTTGGTTGTACTTTAAATTTTCCAATTAGTCCTATTGACACTGTACCAGTAACTTTAAAGCCAGGAATGGATGGCCCAAAGGTTAAACAGTGGCCATTGACAGAAGAAAAAATAAAAGCATTA…
303193_2017_AE	CCTCAAATCACTCTTTGGCAACGACCCCTTGTCACAGTAAAAATAGGAGGACAGCAGAGAGAAGCTCTATTAGATACAGGAGCAGATGATACAGTATTAGAAGATATAAATTTGCCAGGAAAATGGAAACCAAAATTGATAGGGGGAATTGGAGGTTTTATCAAAGTAAGGCAATATGATCAGATACTTATAGAAATTTGTGGAAAAAAGGCTATAGGTACAGTATTAGTAGGACCTACACCTGTCAACATAATTGGACGAAATATGTTGACACAGATTGGTTGTACTTTAAATTTTCCAATAAGTCCTATTGACACTGTACCAGTAACATTAAAGCCAGGAATGGATGGACCAAAAGTTAAACAGTGGCCATTGACAGAARAAAAAATAAAAGCATTA…
303262_2017_AE	CCTCAAATCACTCTTTGGCAACGACCCGTTGTCACAATAAAAGTAGGGGGACAACTAAGAGAAGCTCTATTAGATACAGGAGCAGATGATACAGTATTAGAAGATATAAATTTGCCAGGAAAATGGAAACCAAAAATGATAGGGGGAATTGGAGGTTTTATCAARGTAAGACAATATGATCAGATACCTATAGAAATTTGTGGAAAAAAGGCTATAGGTACAGTATTAGTAGGACCTACACCTGTCAACATAATTGGGCGAAATATGTTGACTCAACTTGGTTGTACTTTAAATTTCCCCATTAGTCCTATTGAAACTGTACCAGTAAAATTAAAGCCAGGAATGGATGGACCAAAGGTTAAACAGTGGCCATTGACAGAAGAAAAAATAAAAGCATTA…
303263_2017_AE	CCTCAAATCACTCTTTGGCAACGACCCCTTGTCACAATAAAAATAGGAGGACAGCTRAAAGAAGCTCTATTAGATACAGGAGCAGATGATACAGTATTAGAAGATATAAATTTGCCAGGAAAATGGAAACCAAAAATGATAGGGGGAATTGGAGGTTTTATCAAAGTAAGGCAATATGATCAAATACTTATAGAAATTTGTGGAAAAAGGGCTATAGGTACAGTGTTAGTAGGACCTACACCTATCAACATAATTGGACGAAACATGTTGACTCAGCTTGGTTGTACTTTAAATTTTCCAATTAGTCCTGTTGACACTGTACCAGTAACATTAAAACCAGGAATGGATGGACCAAAGGTTAAACAGTGGCCATTGACAGAAGAAAAAATTAAAGCATTA…
303402_2017_AE	CCTCAAATCACTCTTTGGCAACGACCCCTTGTCACAATAAAAATAGGAGGACAGCTAAAAGAAGCTCTATTAGATACAGGAGCAGATGATACAGTATTAGAAGATATAAATTTGCCAGGAAAATGGAAACCAAAAATGATAGGGGGAATTGGAGGTTTTATCAAGGTAAGGCAATATGATCAGATAWCTATAGAAATTTGTGGAAAAAAGGCTATAGGTACAGTGTTAGTAGGACCTACACCTATCAACATAATTGGACGAAATATGTTGACTCAGCTTGGTTGTACTTTAAATTTCCCAATTAGTCCTATTGACACTGTACCAGTAACATTAAAGCCAGGAATGGATGGACCAAAGGTTAAACAGTGGCCATTGACAGAAGAAAAAATAAAAGCATTA…
303438_2017_AE	CCTCAAATCACTCTTTGGCAACGACCAGTAGTTATAATAAAAATAGAGGGACAGCTAAAAGAAGCTCTATTAGATACAGGAGCAGATGATACAGTATTAGAGGATATAAATTTGCCAGGAAAATGGAAACCAAAAATGATAGGGGGAATTGGAGGTTTTATCAAAGTAAGACAATATGATCAGATAATTATAGAAATTTGTGGAAAAAGGGCTATAGGTACAGTGTTGGTAGGACCCACACCTGTCAACATAATTGGACGAAATATGTTGACTCAGCTTGGTTGTACTTTAAATTTCCCAATTAGTCCTATTGACACTGTACCCGTAACATTAAAGCCAGGAATGGATGGACCAAAGGTTAAACAGTGGCCATTGACAGAAGAAAAAATAAAAGCATTA…
303521_2017_AE	CCTCAAATCACTCTTTGGCAACGACCCCTTGTCACAATAAAAGTAGGAGGACAGTTGAGAGAAGCTCTATTAGATACAGGAGCAGATGATACAGTGTTAGAAGACATARATTTACCAGGAAAATGGAAACCAAAAATGATAGGGGGAATTGGAGGTTTTATCAAGGTAAGGCAATATGATCAAATACCTATAGAAATTTGTGGAAAAAGGGCTATAGGTACAGTGTTAGTAGGACCTACACCTGTCAACATAATTGGACGAAACATGTTGACTCAGCTTGGKTGTACTTTAAATTTTCCAATTAGTCCTATTGACACTGTACCAGTAAMATTAAAGCCAGGAATGGATGGGCCAAAGGTTAAACAGTGGCCATTGACAGAAGAAAAAATAAAAGCATTA…
303624_2017_AE	CCTCAAATCACTCTTTGGCAGCGACCCCTTGTCACAATAAAAATAGRAGGACAGTTGAGAGAAGCTCTACTAGATACAGGAGCAGATGATACAGTATTAGAAGATATAAATTTGCCAGGAAAATGGAAACCAAAAATGATAGGGGGAATTGGAGGTTTTATCAAAGTAAGGCAATATGAAGAGATACTTATAGAAATTTGTGGAAAAAAGGCTATAGGTACAGTGTTGGTAGGACCTACACCTGTCAACATAATTGGACGAAATATGTTGACTCAGCTTGGTTGTACTTTAAATTTCCCAATTAGTCCTATTGACACTGTACCAGTAACATTAAAGCCAGGAATGGATGGACCAAAGGTTAAACAGTGGCCATTGACAGAAGAAAAAATAAAAGCATTA…
303682_2018_AE	~~~~~~~~~~~~~~~TGGCAACGACCCCTTGTCACAATAAAAATAGGAGGACAGCTGAAAGAAGCTCTATTAGATACAGGAGCAGATGATACAGTATTAGAAGATATAAATTTGCCAGGGAAATGGAAACCAAAAATGATAGGGGGAATTGGAGGTTTTATCAAAGTAAGGCAATATGATCAGATACTTATAGAAATTTGTGGAAAAAAGGCTATAGGTACAGTGTTAGTAGGACCTACACCTATCAACATAATTGGACGAAATATGTTGACTCAGATTGGTTGTACATTAAATTTCCCAATTAGTCCTGTTGACACTGTACCAGTTACATTAAAGCCAGGAATGGATGGACCAAAGGTTAAACAGTGGCCATTGACAGAAGAAAAAATAAAAGCATTA…
010913_2018_AE	~~~~~~~~~~~~~~~TGGCAACGACCCCTTGTCACARTAAAAATAGGRGGACAGCTRARAGAAGCTCTATTAGATACAGGAGCAGATGATACAGTATTAGAAGATATAAATTTGCCAGGAAAATGGAAACCAAAAATGATAGGGGGAATTGGAGGTTTTATCAAAGTAAGGCAATATGATCAGATACCTATAGAAATTTGTGGAAAAAAGGCTATAGGTACAGTATTAGTAGGACCTACACCTGTCAACATAATTGGGCGAAATATGTTGACTCAGCTTGGTTGTACTTTAAATTTCCCAATTAGTCCTATTGACACTGTACCAGTAACATTAAAGCCAGGAATGGATGGACCAAAGGTTAAACAGTGGCCATTGACAGAAGAAAAAATAAAAGCATTA…
011612_2018_AE	~~~~~~~~~~~~~~~TGGCAACGACCCCTTGTCRCARTAAAAATAGAAGGACAGTTGAGAGAAGCTCTACTAGATACAGGAGCAGATGATACAGTATTAGAAGATATAAATTTGCCAGGAAAATGGAAACCAAAAATGATAGGGGGAATTGGAGGTTTTATCAAAGTAARGCAATATGATCAGRTACTTATAGAAATTTGTGGAAAAAAGGCTATAGGTACAGTGTTGGTAGGACCTACACCTGTCAACATAATTGGACGAAATATGTTGACTCAGATTGGTTGTACTTTAAATTTCCCAATTAGTTCTATTGACACTGTACCAGTAACATTAAAGCCAGGAATGGATGGACCAAARGTTAAACAGTGGCCATTGACAGAAGAAAAAATAAAAGCATTA…
011617_2018_AE	~~~~~~~~~~~~~~~TGGCAACGACCCCTTGTCACAGTAAAAGTAGGAGGACAGTTGAGAGAAGCTCTATTAGATACAGGAGCAGATGATACAGTATTAGAAGATATAAATTTGCCAGGAAAATGGAAACCAAAAATGATAGGGGGAATTGGAGGTTTTATCAARGTAAGACAATATGATCAGATACTTATAGAAATTTGTGGAAAAAGGGCTATAGGTACAGTRTTAGTAGGACCTACACCTGTCAACATAATTGGACGAAATATGTTGACTCAACTYGGTTGTACTTTAAATTTTCCAATTAGTCCTATTGACACTGTACCAGTAACATTAAAGCCAGGAATGGATGGACCAAAGGTTAAACAGTGGCCATTAACAGAAGAAAAAATAAAAGCATTA…
011621_2018_AE	~~~~~~~~~~~~~~~TGGCAACGACCCCTTGTCACAATAAAAATAGGAGGAGAGCTAAGAGAGGCTCTGTTAGATACAGGAGCAGATGATACAGTATTAGAAGATATAAATTTGCCAGGAAAATGGAAGCCAAAAATGATAGGGGGAATTGGAGGTTTTATCAAAGTAAGGCAATATGATCAGATACCTATAGAAATTTGTGGAAAAAGGGCTATAGGTACAGTGTTAGTAGGACCTACACCTGTCAACATAATTGGACGAAATATGTTGACTCAGCTTGGTTGTACTTTAAATTTCCCAATTAGTCCTATTGAAACTGTACCAGTAAAATTAAAGCCAGGAATGGATGGACCAAAGGTTAAACAGTGGCCATTGACAGAAGAAAAAATAAAAGCATTA…
303710_2018_AE	~~~~~~~~~~~~~~~TGGCAGCGACCCATAGTCCCAGTAAGAATAGGAGGACAGCTGAGAGAAGCTCTATTAGATACAGGAGCAGATGATACAGTATTAGAAGATATAAATTTGCCAGGAAAATGGAAGCCAAAAATGATAGGGGGAATTGGAGGTTTTATCAAAGTAAGACAATATGATCAGATACTTATAGAAATTTATGGAAAAAAGGCTATAGGTACAGTATTAGTAGGACCTACACCTGTCAACATAATTGGACGAAATATGTTGACTCAGATTGGTTGTACTTTAAATTTCCCAATTAGTCCTATTAACACTGTACCAGTCACATTAAAACCAGGAATGGATGGACCAAAGGTTAAACAGTGGCCATTGACAGAAGAAAAAATAAAAGCATTA…
303726_2018_AE	~~~~~~~~~~~~~~~TGGCAACGACCCCTTGTCACAATAAAAGTAGAAGGACAGCTAAGAGAAGCTCTATTAGACACAGGAGCAGATGATACAGTATTAGAAGATATAAATTTGCCAGGAAAATGGAAACCAAAAATGATAGGGGGAATTGGAGGTTTTATCAAGGTAAGGCAATATGATCAGATACTTATAGAAATTTGTGGAAAAAGAGCTATAGGTACAGTRTTAGTAGGACCTACACCTGTCAACATAATTGGACGAAATATGTTGACTCAGCTTGGTTGTACTTTAAATTTyCCAATTAGTCCTATTGACACTGTACCAGTAACATTAAAGCCAGGAATGGATGGACCAAAGGTTAAACAGTGGCCATTAACAGAAGAAAAAATAAAAGCATTA…
020602_2018_AE	~~~~~~~~~~~~~~~TGGCAACGACCCCTTGTCACAGTAAAAATAGGGGGACAGCTGAAAGAAGCTCTATTAGATACAGGAGCAGATGATACAGTATTAGAAGATATAAATTTGCCAGGAAAATGGAAACCAAAAATGATAGGGGGAATTGGAGGTTTTATCAAAGTAAGGCAATATGATCAGGTACTTATAGAAATTTGTGGAAAAAGGGCTATAGGTACAGTRTTAGTRGGACCTACCCCTGTCAACATAATTGGACGAAATATGTTGACTCAGATTGGTTGTACTTTAAATTTTCCAATTAGTCCTATTGACACTGTACCAGTAACATTAAAGCCAGGAATGGATGGACCAAAAGTYAAACAGTGGCCATTGACAGAAGAAAAAATAAGAGCATTA…
020615_2018_AE	~~~~~~~~~~~~~~~TGGCAACGACCCCTTGTCACAATAAAAATAGGAGGGCAGCTAAGAGAAGCTCTATTAGATACAGGAGCAGATGATACAGTATTAGAAGATATAAATTTGCCAGGAAAATGGAAACCAAAAATGATAGGGGGAATTGGAGGTTTTATCAAGGTAAGRCAATATGATCAGATACCTATAGAAATTTGTGGAAAAAAGGCTATAGGTACAGTGTTAGTAGGACCTACACCTGTCAACATAATTGGACGAAATATGTTGACTCAGCTTGGTTGTACTTTAAATTTYCCAATTAGTCCTATTGACACTGTACCAGTAAMATTAAAGCCAGGAATGGATGGACCAAAGGTTAAACAGTGGCCATTGACAGAAGAAAAAATAAAAGCATTA…
303760_2018_AE	~~~~~~~~~~~~~~~TGGCAACGACCCCTTGTCACAATAAAAATAGGAGGACAGCTGAAAGAAGCTCTATTAGATACAGGAGCAGATGATACAGTATTAGAAGATATAAATTTGCCAGGAAAATGGAAACCAAAAATGATAGGGGGAATTGGAGGTTTTATCAAAGTAAGGCAATATGATCAAATACTTATAGAAATTTGTGGAAAAAAGGCTATAGGTACAGTGTTAGTAGGACCTACACCTATCAACATAATTGGACGAAACATGTTGACTCAGCTTGGTTGTACTTTAAATTTTCCAATTAGTCCTGTTGACACTGTACCWGTARCATTAAAACCAGGAATGGATGGACCAAAGGTTAAACAGTGGCCATTGACAGAAGAAAAAATTAAAGCATTA…
022726_2018_AE	CCTCAAATCACTCTTTGGCAACGACCCCTTGTCACAGTAAAAATAGGGGGACAGCTGAAAGAAGCTCTATTAGATACAGGAGCAGATGATACAGTATTAGAAGAYATAAATTTGCCAGGAAAATGGAAACCAAAAATGATAGGGGGAATTGGAGGTTTTATCAAAGTAAGGCAATATGATCAGGTACTTATAGAAATTTGTGGAAAAAGGGCTATAGGTACAGTATTAGTAGGACCTACCCCTGTCAACATAATTGGACGAAATATGTTGACTCAGATTGGTTGTACTTTAAATTTTCCAATTAGTCCTATTGACACTGTACCAGTAACATTAAAGCCAGGAATGGATGGACCAAAAGTTAAACAGTGGCCATTGACAGAAGAAAAAATAAGAGCATTA…
303737_2018_AE	~~~~~~~~~~~~~~~TGGCAACGACCCCTAGTCACAATAAAAATAGGAGGACAGCTAAAAGAAGCTCTATTAGATACAGGAGCAGATGATACAGTATTAGAAGATATAAATTTGCCAGGAAAATGGAAACCAAAAATGATAGGGGGAATTGGAGGTTTTATCAAAGTAAGGCAATATGATCAAATACTTATAGAAATTTGTGGAAAAAAGGCTATAGGTACAGTGTTAGTAGGACCTACACCTGTCAACATAATTGGACGAAATATGTTGAYTCAGCTTGGTTGTACTCTAAATTTTCCAATTAGTCCTATTGACACTGTACCAGTAACACTAAAACCAGGAATGGATGGACCAAAGGTTAAACAGTGGCCATTGACAGAAGAAAAAATAAAAGCATTA…
303734_2018_AE	~~~~~~~~~~~~~~~TGGCAACGACCAGTTGTCACAGTGAGAATAGAAGGACAGCTAAAAGAAGCTCTATTAGATACAGGGGCAGATGATACAGTATTAGAAGATATAAATTTGCCAGGAAAATGGAAACCAAAAATGATAGGGGGAATTGGAGGTTTTATCAAAGTAAGGCAATATGATCAGATACTTATAGAAATTTGTGGAAAACAGGCTATAGGTACAGTGTTAGTAGGACCTACACCTGTCAACATAATTGGACGAAATATGTTGACTCAGATTGGTTGTACTTTAAATTTTYCAATTAGTCCTGTTGACACTGTACCAGTAAAATTAAAGCCAGGAATGGATGGACCAAAGGTCAAACAGTGGCCATTGACAGAAGAAAAAATAAAAGCACTA…
030602_2018_AE	~~~~~~~~~~~~~~~TGGCAACGACCCCTTGTCACAATAAAAATAGGAGGACAGCTAAGGGAAGCTCTATTAGATACAGGAGCAGATGATACAGTATTAGAAGATATAAATTTGCCAGGAAAATGGAAACCAAAAATGATAGGGGGAATTGGAGGTTTTATCAAAGTCARGCAATATGATCAGATACCTATAGAAATTTGTGGAAAAAGGGCTATAGGTACGGTGTTAGTAGGACCTACACCTGTCAACATAATTGGACGAAATATGTTGACTCAGCTTGGTTGTACTTTAAATTTCCCAATTAGTCCTATTGACACTGTACCAGTAACATTAAAACCAGGAATGGATGGACCAAAGGTTAAACAGTGGCCATTGACAGAAGAAAAAATAAAAGCATTA…
030619_2018_AE	~~~~~~~~~~~~~~~TGGCAGCGACCCCTTGTCACAATAAAAATAGGAGGGCAGCTAAGAGAAGCTCTATTAGATACAGGAGCAGATGATACAGTATTAGAAGATATAAATTTGCCAGGAAAATGGAAACCAAAAATGATAGGGGGAATTGGAGGTTTTATCAAGGTAAGGCAATATGATCAGATACCTATAGAAATTTGTGGAAAAAAGGCTATAGGTACAGTGTTAGTAGGACCTACACCTGTCAACATAATTGGACGAAATATGTTGACCCAGCTTGGATGTACTTTAAATTTCCCAATTAGTCCTATTGACACTGTACCAGTAACATTAAAGCCAGGAATGGATGGACCAAAGGTTAAACAGTGGCCATTGACAGAAGAAAAAATAAAAGCATTA…
031315_2018_AE	~~~~~~~~~~~~~~~TGGCAACGACCCCTCGTCACAATAAAAATAGGAGGACAGCTGAGGGAAGCTCTATTAGATACAGGAGCAGATGATACAGTATTAGAAGATATAAATTTGCCAGGAAAATGGAAACCAAAAATGATAGGGGGAATTGGAGGTTTTATCAAAGTAAGGCAATATGATCAGATACTTATAGAAATTTGTGGAAAAAAGGCTATAGGTACAGTGTTAGTRGGACCTACACCTGTCAACATAATTGGACGAAATATGTTGACTCAGATGGGTTGTACTTTAAATTTTCCAATTAGTCCTATTGACACTGTACCAGTAAAATTAAAGCCAGGAATGGATGGACCAAAAGTTAAACAGTGGCCATTGACAGAAGAAAAAATAATAGCATTA…
032001_2018_AE	~~~~~~~~~~~~~~~TGGCARCGACCCCTTGTCACAATAAAAATAGGAGGACAGCTGAAaGAAGCTCTATTAGATACAGGAGCAGATGATACAGTATTAGAAGATATAAATTTGCCAGGAAAATGGAAACCAAAAATGATAGGGGGAATTGGAGGTTTTATCAARGTAAGACAATATGATCAGATACTGATAGAAATTTGTGGAAAAAAGGCTATAGGTACAGTGTTAGTAGGACCTACACCTGTCAACATAATTGGACGAAATATGTTGACTCAGATTGGTTGTACTTTAAATTTCCCAATTAGCCCTATTGACACTGTACCAGTAACATTAAAACCAGGAATGGATGGACCAAGGGTTAAACARTGGCCATTAACAGAAGAAAAAATAGAAGCATTA…
032709_2018_AE	~~~~~~~~~~~~~~~TGGCAACGACCTCTTGTCATAATAAAAATAGGGGGACAGCTAAGAGAAGCTCTATTAGATACAGGAGCAGATGATACAGTATTAGAAGATATAGATTTGCCAGGAAAATGGAAACCAAAAATGATAGGGGGAATTGGAGGTTTTATCAAAGTAAGRCAATATGATCAgATACCTATAGAAATTTGTGGAAAAAAGGCTATAGGTACAGTGTTAGTAGGACCTACACCTGTCAACATAATTGGACGAAATATGTTGACTCAGCTTGGTTGTACTTTAAATTTCCCAATTAGTCCTATTGACACTGTACCAGTAaaATTAAAGCCAGGAATGGATGGACCAAAGGTTAAACAGTGGCCATTGACAGAAGAAAAAATAAAAGCATTA…
303815_2018_AE	~~~~~~~~~~~~~~~TGGCAACGACCCCTTGTCACAATAAAAATAGGAGGACAGYTAAGAGAAGCTCTATTAGACACAGGAGCAGATGATACAGTATTAGAAGATATAAATTTGCCAGGAAAATGGAAACCAAAAATGATAGGGGGAATTGGAGGTTTTATCAAGGTAAGGCAATATGATGAAATACCTATAGAAATTTGTGGAAAAAGGGCTGTAGGTACGGTGTTAATAGGACCTACACCTGTCAACATAATTGGACGAAATATGTTGACTMAGCTTGGTTGTWCTTTAAATTTCCCAATTAGTCCTATTGACACTGTACCAGTATCATTAAAACCAGGAATGGATGGGCCAAAGGTTAAACAGTGGCCATTGACAGAAGAAAAAATAAAAGCATTA…
303800_2018_AE	~~~~~~~~~~~~~~~TGGCAACGACCCCTTGTCACAATAAAAATAGGAGGACAGCTAAGAGAAGCTCTATTAGATACAGGAGCTGATGATACAGTATTAGAAGATATAAATTTGCCAGGAAAATGGAAACCAAAAATGATAGGGGGAATTGGAGGTTTTATCAAAGTAAGGCAATATGATCAGATACCTATAGAAATTTGTGGAAAAAGGGCTATAGGTACGGTGTTAATAGGACCTACACCTGTCAACATAATTGGACGAAATATGTTGACTCAGCTTGGTTGTACTTTAAATTTCCCAATTAGTCCTATCGACACTRTACCAGTAACATTAAAGCCAGGAATGGATGGACCAAAGGTTAAACAATGGCCATTGACAGAAGAAAAAATAAAAGCATTA…
303833_2018_AE	~~~~~~~~~~~~~~~TGGCAGCGACCCCTCGTCACAATAAAAATAGAAGGACAGCTAAAAGAAGCTCTATTAGACACAGGAGCAGATGATACAGTATTAGAAGATATAAATTTGCCAGGAAAATGGAAACCAAAAATGATAGGGGGAATTGGAGGTTTTATCAAAGTAAGGCAATATGATCAGATACTTATAGAAATTTGTGGAAAAAGGGCTATAGGAACAGTGTTAGTAGGACCTACACCTGTCAACATAATTGGACGAAATATGTTGACTCAGCTTGGTTGTACTTTAAACTTCCCAATTAGTCCTATTGACACTGTACCAGTAACATTAAAGCCAGGAATGGATGGACCAAAGGTTAAACAGTGGCCATTGACAGAAGAAAAAATAAAAGCATTA…
322835_2018_AE	~~~~~~~~~~~~~~~TGGCARCGACCCCTTGTCRCAATAAAAATAGGAGGACAGCTAAAAGAAGCTCTATTAGATACAGGAGCAGATGATACAGTATTAGAAGATATAAATTTACCAGGAAAATGGAAACCAAAAATGATAGGGGGAATTGGAGGTTTTATCAAAGTAAGGCAATATGATCARATAGCTATAGAAATTTGTGGAAAAAGGGCTATAGGTACAGTGTTAGTAGGACCTACACCTGTCAACATAATTGGACGAAAYATGTTGACTCAGCTTGGKTGCACTTTAAAYTTCCCAATTAGTCCTATTGACACTGTACCAGTAACATTAAAGCCAGGAATGGATGGACCAAAGGTTAAACAGTGGCCATTGACAGAAGAAAAAATAAAAGCATTA…
323208_2018_AE	~~~~~~~~~~~~~~~tggcaacgaccccttgtcacaataaaaatagggggacaactaaaagaagctctattagatacaggagcagatgatacagtattagaagatataaatttgccaggaaaatggaaaccaaaaatgatagggggaattggaggttttatcaaggtaaggcaatatgatcagatacctatagaaatttgtggaaaaaaggctataggtacagtattrgtaggacctacacctatcaatataattggacgaaatatgttgactcaacttggttgtactttaaatttccccattagtcctattgaaactgtaccagtaaaattaaagccaggaatggatggaccaaaggttaaacagtggccattgacagaagaaaaaataaaagcatta…
303835_2018_AE	~~~~~~~~~~~~~~~TGGCARCGACCCCTTGTCRCAATAAAAATAGGAGGACAGCTAAAAGAAGCTCTRTTAGATACAGGAGCAGATGATACAGTATTAGAAGATATAAATTTACCAGGAAAATGGAAACCAAAAATGATAGGGGGAATTGGAGGTTTTATCAAAGTAAGGCAATATGATCARATAGCTATAGAAATTTGTGGRAAAAGGGCTATAGGTACAGTGTTAGTAGGACCTACACCTGTCAACATAATTGGACGAAACATGTTGACTCAGCTTGGKTGCACTTTAAAYTTCCCAATTAGTCCTATTGACACTGTACCAGTAACATTAAAGCCAGGAATGGATGGACCAAAGGTTAAACAGTGGCCATTGACAGAAGAAAAAATAAAAGCATTA…
041702_2018_AE	~~~~~~~~~~~~~~~TGGCAACGACCCCTTGTCACAATAAAAATAGAAGGACAGCTAAAAGAAGCTCTATTAGATACAGGAGCAGATGATACAGTATTAGAAGATATAAATTTGCCAGGAAAATGGAAACCAAAAATGATAGGGGGAATTGGAGGTTTTATCAAAGTAAGGCAATATGATCAGATACAGATAGAAATTTGTGGAAAAAAGGCTATAGGTACAGTGCTAGTAGGACCTACACCTGTTAACATAATTGGACGAAATATGTTGACTCAGMTTGGTTGTACTTTAAWTTTTCCAATTAGTCCTATTGACACTGTACCAGTAAAATTAAAACCAGGAATGGATGGACCAAAGGTTAAACAATGGCCATTGACAGAAGAAAAAATAAAAGCATTA…
303861_2018_AE	~~~~~~~~~~~~~~~TGGCAACGACCCCTTGTCACAATAAAAATAGGAGGACAGCTAAGAGAAGCTCTATTAGATACAGGAGCAGATGATACAGTATTAGAAGATATAAATTTGCCAGGAAAATGGAAACCAAAAATGAYAGGGGGAATTGGAGGTTTTATCAAGGTAAAGCAGTATGATCAGATACCTATAGAAATTTGTGGAAAAAGGGCTATAGGTACAGTGTTAGTAGGACCTACACCTGTCAACATAATTGGGCGAAATATGTTGACTCAGCTTGGTTGTACTTTAAATTTCCCAATTAGTCCTATTGACACTGTACCAGTAACATTAAARCCAGGAATGGATGGACCAAAGGTTAAACAGTGGCCATTGACAGAAGAAAAAATAAAAGCATTA…
042421_2018_AE	~~~~~~~~~~~~~~~TGGCAACGACCCCTTGTCACAATAAAAATAGAAGGACAGCTAAAAGAAGCTCTATTAGATACAGGAGCAGATGATACAGTATTAGAAGATATAGATTTGCCAGGGAGATGGAAACCAAAAATGATAGGGGGAATTGGAGGTTTTATTAAAGTAAGGCAATATGATCAGATACTTATAGAAATTTGTGGAAAAAGGGCTATAGGTACAGTGTTAGTAGGACCTACACCTGTTAACATAATTGGACGAAATATGTTGACTCAGATTGGTTGTACTTTAAATTTCCCAATTAGTCATATTGACACTGTACCAGTAACATTAAAGCCAGGAATGGATGGACCAAAGGTTAAACAGTGGCCATTAACAGAAGAAAAAATAAAAGCATTG…
050201_2018_AE	~~~~~~~~~~~~~~~TGGCAACGACCCCTCRTCCCAATAAAAATAGGAGGACAGGTGAGAGAGGCTCTATTAGATACAGGAGCAGATGATACAGTATTAGAAGATATAAATTTACCAGGGAAATGGAAACCAAAAATGATAGGGGGAATTGGAGGTTTTATCAAAGTAAGGCAATATGATCAGATACYTATAGAAATTTGTGGAAAAAAGGCTATAGGTACAGTGTTAGTAGGACCTACACCTGTCAACATAATTGGACGAAATATGTTGACTCAGCTTGGTTGTACTTTAAATTTTCCAATTAGTCCTGTTGACACTGTACCAGTAACACTAAAGCCAGGAATGGATGGACCAAAGGTTAAACAGTGGCCATTGACAGAAGAAAAAATAAAAGCATTA…
050203_2018_AE	CCTCAAATCACTCTTTGGCAACGACCCCTTGTCACAATAAGGATAGAAGGACAGCTGAAAGAAGCTCTATTAGATACAGGAGCAGATGATACAGTATTAGAAGATATAAATTTGCCAGGGAAATGGAAACCAAAAATGATAGGGGGAATTGGAGGTTTTATCAAAGTAAGGCAATATGATCAGATACTTATAGAAATTTGTGGAAAAAGGGCTATAGGTACAGTGTTAGTAGGACCTACACCTGTCAACATAATTGGGCGAAATATGTTGACTCAGATTGGTTGTACTTTAAATTTCCCAATTAGTTCTATTGACACTGTACCAGTTACATTAAAGCCAGGAATGGATGGACCAAAGGTTAAACAATGGCCATTGACAGAAGAAAAAATAAAAGCATTA…
303870_2018_AE	~~~~~~~~~~~~~~~TGGCAGCGACCCCTTGTCTCAATAAAAATAGGAGGACAGMTAAGAGARGCTCTATTAGATACAGGAGCAGATGATACAGTATTAGAAGAYATAAATTTGCCAGGAAAATGGAAACCAAAAATGATAGGGGGAATTGGAGGTTTTATCAAGGTAAGGCAATATGATCAGGTACCTATAGAAATTTGTGGAAAAAGGGCTATAGGTACAGTGTTAGTAGGACCTACACCTGTCAACATAATTGGACGAAATATGTTGACTCAGCTTGGTTGTACTTTAAATTTCCCAATTAGTCCTATTGACACTGTACCAGTAACATTAAAGCCAGGAATGGATGGACCAAAGGTTAAACAGTGGCCATTGACAGAAGAAAAAATAAAAGCATTA…
050822_2018_AE	~~~~~~~~~~~~~~~TGGCAACGACCCCTTGTCACAATAAAAATAGGGGGACAGCTGAGAGAAGCTCTATTAGATACAGGAGCAGATGATACAGTATTAGAAGATATAAATTTACCAGGAAAATGGAAACCAAAAATGATAGGGGGAATTGGAGGTTTTATCAAAGTAAGGCAATATGATCAGATACTGATAGAAATTTGTGGAAAAAAGGCTATTGGTACAGTGCTAGTAGGACCTACACCTGTCAACATAATTGGACGAAACATGTTGACTCAGCTTGGTTGTACTTTAAATTTTCCAATTAGTCCTATTGACACTGTACCAGTAACATTAAAACCAGGAATGGATGGACCAAAAGTTAAACAATGGCCATTGACAGAAGAAAAAATAAAAGCATTA…
303886_2018_AE	~~~~~~~~~~~~~~~TGGCAACGACCCCTTGTCACAGTAAAAATAGAAGGACAGCTAAGAGAAGCTCTATTAGATACAGGAGCAGATGATACAGTATTAGAAGATATAAATTTACCAGGAAAATGGAAGCCAAAAATGATAGGGGGAATTGGAGGTTTTATCAAGGTAAGGCAATATGATCAGATACTTATAGAAATTTGTGGAAAAAGGGCTATAGGTACAGTATTAGTAGGACCTACACCTGTCAACATAATTGGACGAAATATGTTGACTCAGATTGGTTGTACRTTAAATTTCCCAATTAGTCCTATTGACACTGTACCAGTAACATTAAAGCCAGGAATGGATGGACCAAAGGTTAAACAGTGGCCATTGACAGAAGAAAAAATAAAAGCATTA…
052222_2018_AE	CCTCAAATCACTCTTTGGCAGCGACCCSTTGTCRCAATAARARTAGAAGGACAGTTGAGAGAAGCTCTACTAGACACAGGAGCAGATGATACAGTATTAGAAGATATAAATTTGCCAGGAAAATGGAAACCAAAAATGATAGGGGGAATTGGAGGTTTTATCAAAGTAAGGCAATATGATCAGATACTTATAGAAATTTGTGGAAAAAAGGCTATAGGTACAGTGTTGGTAGGACCTACACCTGTCAACATAATTGGACGAAATATGTTGACTCAGCTTGGTTGTACTTTAAATTTCCCAATTAGTCCTATTGACACTGTACCAGTAACATTAAAGCCAGGAATGGATGGACCAAAGGTTAAACAGTGGCCATTGACAGAAGAAAAAATAAAAGCATTA…
303900_2018_AE	~~~~~~~~~~~~~~~TGGCAACGACCCCTTGTCACAATAAAAATAGGAGGACAGCTAAGAGAAGCTyTATTAGACACAGGAGCAGATGATACAGTATTAGAAGATATAAATTTGCCAGGAAAATGGAAACCAAAAATGATAGGGGGAATTGGAGGTTTTATCAAGGTAAAGCAATATGATCAAATACCTATAGAAATTTGTGGGAAAAAGGCTATAGGTACAGTGTTAGTAGGACCTACACCTGTCAACATAATTGGACGAAATCTGTTGACTCAGCTTGGTTGTACTTTAAATTTCCCAATTAGTCCTATTGACACTGTACCAGTAACATTAAAGCCAGGAATGGATGGACCAAAGGTTAAACAGTGGCCATTGACAGAAGAAAAAATAAAAGCATTA…
303896_2018_AE	~~~~~~~~~~~~~~~TGGCAACGACCCCTTGTCACAATAAAAATAGGAGGGCAGCTAAGAGAAGCTCTATTAGATACAGGAGCAGATGATACAGTATTAGAAGATATAAATTTGCCAGGAAAATGGAAACCAAAAATGATAGGGGGAATTGGAGGTTTTATCAAGGTAAGGCAATATGATCAGATACCTATAGAAATTTGTGGAAAAAAGGCTATAGGTACAGTGTTAGTAGGACCTACACCTGTCAACATAATTGGACGAAATATGTTGACTCAGCTTGGTTGTACTTTAAATTTCCCAATTAGTCCTATTGACACTGTACCAGTAACATTAAAGCCAGGAATGGATGGACCAAAGGTTAAACAGTGGCCATTGACAGAAGAAAAAATAAAAGCATTA…
052224_2018_AE	~~~~~~~~~~~~~~~TGGCAACGACCCCTTGTCACAATAAGAATAGGAGGGCAGCTGAAAGAAGCGCTATTAGATACAGGAGCAGATGATACAGTATTAGAAGATATAAACTTGCCAGGAAAATGGAAACCAAAAATGATAGGGGGAATTGGAGGTTTTATCAAAGTAAGACAATATGATCAGATACCTATAGAAATTTGTGGAAAAAGGGCTATAGGTACAGTGTTAGTAGGACCTACACCTGTCAACATAATTGGACGAAATATGTTGACTCAGCTTGGTTGTACTTTAAATTTCCCAATTAGTCCTATTGACACTGTACCAGTAAAATTAAAGCCAGGAATGGATGGACCAAAGGTTAAACAGTGGCCATTGACAGAAGAAAAAATAAAAGCATTA…
303907_2018_AE	~~~~~~~~~~~~~~~TGGCAACGACCCCTTGTCACAATAAAAATAGGAGGACAGCTGAGAGAAGCTCTATTAGATACAGGAGCAGATGATACAGTATTAGAAGATATAAATTTGCCAGGGAAATGGAAACCAAAAATGATAGGGGGAATTGGAGGTTTTATCAAAGTAAGGCAATATGATCAGATACAGATAGAAATTTGTGGAAAAAAGGCTATAGGTACAGTGCTAGTAGGACCTACACCTGTTAACATAATTGGACGAAATATGTTGACTCAGCTTGGTTGTACTTTAAATTTTCCAATTAGTCCTATTGACACTGTACCAGTAACATTAAAGCCAGGAATGGATGGACCAAAGGTTAAACAGTGGCCATTGACAGAAGAAAAAATAAAAGCATTA…
303922_2018_AE	~~~~~~~~~~~~~~~TGGCAGCGACCAGTTGTCACAGTAAAAATAGAAGGACAGCTGAGAGAAGCTCTATTAGATACAGGAGCAGATRATACAGTATTAGAAAATATAAATCTGYMAGGAAAATGGAAACCAAAAATGATAGGGGGAATTGGAGGTTTTATCAAAGTAAGGCAATATGATCAGATACTTATAGAAATTTGTGGAAAAAAGGCTATAGGTACAGTGTTAGTARGRCCTACACCTGTCAACATAATTGGACGAAATATGTTGACTCAGATTGGTTGTACTTTAAATTTTCCAATTAGTCCTATTGACACTGTACCAGTAAAATTAAAGCCAGGAATGGATGGACCAAAGGTTAAACAGTGGCCATTGACAGAAGAAAAAATAAAAGCATTA…
303954_2018_AE	~~~~~~~~~~~~~~~TGGCAACGACCCCTTGTCACAATAAAAGTAGGAGGACAGCTRAAAGAAGCTCTATTAGATACAGGAGCAGATGATACAGTGTTAGAAGATATARATTTACCAGGAAAATGGAAACCAAAAATGATAGGGGGAATTGGAGGTTTTATCAAGGTAAGGCAATATGATCWAATACCTATAGAAATTTGTGGAAAAAAGGCTATAGGTACAGTGTTAGTAGGACCTACACCTGTCAACATAATTGGACGAAACWTGTTGACTCAGCTTGGTTGTACTTTAAATTTTCCAATTAGYCCTATTGACMCTGTACCAGTAAMATTAAAGCCAGGAATGGATGGGCCAAAGGTTAAACAGTGGCCATTGACAGAAGAAAAAATAAAAGCATTA…
303939_2018_AE	~~~~~~~~~~~~~~~TGGCAACGACCCCTTGTCACAATAAAAATAGGAGGACAGTTGAGAGAAGCTCTAYTAGATACAGGAGCAGATGATACAGTATTAGAAGATATAAATTTGCCAGGAAAATGGAAACCAAAAATGATAGGGGGAATTGGAGGTTTTATCAAAGTAAGGCAATATGATCAGATACTTATAGAAATTTGTGGAAAAAAGGCTATAGGTACAGTGTTGGTAGGACCTACACCTGTCAACATAATTGGACGAAAYATGTTGACTCAGCTTGGTTGTACTTTAAATTTCCCAATTAGTCCTATTGACACTGTACCAGTAACATTAAARCCAGGAATGGATGGACCAAAGGTTAAACAGTGGYCATTGACAGAAGAAAAAATAAAAGCATTA…
061911_2018_AE	CCTCAAATCACTCTTTGGCAACGACCCMTAGTCACWATAAAAATAGGAGGACAGCTAAGAGAAGCTCTATTAGATACAGGAGCAGATGATACAGTATTAGAAGATATAAATTTGCCAGGAAAATGGAARCCAAAAATGATAGGGGGAATTGGAGGTTTTATTAAGGTAAGGCAATATGATCAGATACCTATTGAAATTTGTGGAAAAAAGGCTATAGGTACGGTGTTAATAGGACCTACACCTATCAACATAATTGGACGAAATATGTTGACTCAGCTTGGTTGTACTTTAAATTTCCCAATAAGTCCTATTGACACTGTACCAGTRACATTAAAGCCAGGAATGGATGGACCAAAGGTTAAACAGTGGCCATTGACAGAAGAAAAAATAAAAGCATTA…
303959_2018_AE	~~~~~~~~~~~~~~~TGGCAACGACCCCTTGTCACAATAAAAATAGAAGGACAGCTGAAGGAAGCCCTATTAGATACAGGAGCAGATGATACAGTATTAGAAGATATAAATTTGCCAGGAAAATGGAAACCAAAAATGATAGGGGGAATTGGAGGTTTTATCAAAGTAAGGCAATATGATCAAATACAGATAGAAATTTGTGGAAAAAAGGCTATAGGTACAGTGTTAGTAGGACCTACACCTGTCAACATAATTGGGCGAAATATGTTGACTCAGCTTGGTTGTACTTTAAATTTTCCAATTAGTMCTATTGACMCTGTACCAGTAACATTAAAGCCAGGAATGGATGGACCAAAGGTTAAACAGTGGCCATTGACAGAAGAAAAAATAAAAGCATTA…
062607_2018_AE	CCTCAAATCACTCTTTGGCAACGACCCGTTGTCACAGTAAGAATAGAAGGGCAGCTGAAAGAAGCTCTATTAGATACAGGGGCAGATGATACAGTATTAGAAGATATAAATCTGCCAGGAAAATGGAAACCAAAAATGATAGGGGGAATTGGAGGTTTTATCAAAGTAAGGCAATATGATCAGATACTTATAGAAATTTGTGGAAAACAGGTTAGAGGTACAGTGTTAGTAGGACCTACACCTGTCAACATAATTGGACGAAATATGTTGACTCAACTTGGTTGTACTTTAAATTTTCCAATTAGTCCTGTTGACACTGTACCAGTAACATTAAAGCCAGGAATGGATGGACCAAAGGTCAAACAGTGGCCATTGACAGAAGAAAAAATAAAAGCATTA…
303951_2018_AE	~~~~~~~~~~~~~~~TGGCAACGACCCCTTGTCACAATAAAAATAGGAGGGCAGCTAAGAGAAGCTCTATTAGATACAGGAGCAGATGATACAGTATTAGAAGATATAAATTTGCCAGGAAAATGGAAACCAAAAATGATAGGGGGAATTGGAGGTTTTATCAAGGTAAGGCAATATGATCAGATACCTATAGAAATTTGTGGAAAAAAGGCTATAGGTACAGTGTTAGTAGGACCTACACCTGTCAACATAATTGGACGAAATATGTTGACTCAGCTTGGTTGTACTTTAAATTTCCCAATTAGTCCTATTGACACTGTACCAGTAACATTAAAGCCAGGAATGGATGGACCAAAGGTTAAACAGTGGCCATTAACAGAAGAAAAAATAAAAGCATTA…
303957_2018_AE	cctcaaatcactctttggcaacgaccccttgttacaataaaaataggaggacagctaagagaagctctattagatacaggagcagatgatacagtattagragatataaatttgccaggwaaatggaaaccaaaaatgatagggggaattggaggctttatcaargtaaggcaatatgatcagatatctatagaaatttgtggaaaaaaggctataggtacagtattagtaggacctacacctgtcaacataattggacgaaatwtrttgactcagattggttgtactttaaatttcccaattagtcctrttgacactgtaccagtaacattaaagccaggratggatggmccaaagrttaaacagtggccattgacagaagaaaaaataaaagcatta…
303949_2018_AE	~~~~~~~~~~~~~~~TGGCAACGACCCCTTGTCACAGTAAAAATAGAAGGRCAGTTGAGAGAAGCTCTATTAGATACAGGAGCAGATGATACAGTATTAGAAGATATAAATTTGCCAGGAAAATGGAAACCAAAAATGATAGGGGGAATTGGAGGTTTTATCAARGTAAGGCAATATGATCAGATACTTATAGAAATTTGTGGAAAAAAGGCTGTAGGTACAGTGCTAGTAGGACCTACACCTGTCAACATAATTGGAMGAAATATGTTGACTCAGATTGGTTGTACTTTAAATTTCCCAATTAGTCCTATTGACACTGTACCAGTAACATTAAAGCCAGGAATGGATGGACCAAAGGTTAAACARTGGCCATTGACAGAAGAAAAAATAAAAGCATTA…
303958_2018_AE	~~~~~~~~~~~~~~~TGGCAACGACCCCTTGTYACARTAAAAATAGRAGGACAGTTGAGAGAAGCTCTAYTAGATACAGGAGCAGATGATACAGTATTAGAAGATATAAATTTGCCAGGAAAATGGAAACCAAAAATGATAGGGGGAATTGGAGGTTTTATCAAAGTAAGGCAATATGATCAGATACTTATAGAAATTTGTGGAAAAAAGGCTATAGGTACAGTGTTGGTAGGACCTACACCTATCAACATAATTGGACGAAATATGTTGACTCARCTWGGTTGTACTTTAAATTTCCCAATTAGTCCYATTGACACTGTACCAGTAWCATTAAAGCCAGGAATGGATGGACCAAAGGTTAAACAGTGGCCATKDACAGAAGAAAAAATAAAAGCATTA…
323314_2018_AE	~~~~~~~~~~~~~~~TGGCAACGACCCGTTGTCACAATAAAAGTAGGAGGACAGCTAAAAGAAGCTCTATTAGATACAGGAGCAGATGATACAGTATTAGAAGACATAAGTTTGCCAGGAAAATGGAAACCAAAAATGATAGGGGGAATTGGAGGTTTTATCAAAGTAAGGCAATATGATCAGATACCTATAGAAATTTGTGGAAAAAAGGCTATAGGTACAGTGTTAGTAGGACCTACACCTGTCAACATAATTGGACGAAATATGTTGACTCAGCTTGGTTGTACTTTAAATTTCCCAATTAGTCCTATTGACACTGTACCAGTAACATTAAAGCCAGGAATGGATGGACCAAAAGTTAAACAGTGGCCATTGACAGAAGAAAAAATAAAAGCATTA…
303965_2018_AE	~~~~~~~~~~~~~~~TGGCAACGACCCCTTGTYACAATAAAAATAGGAGGACAGCTGAGAGAAGCKCTATTAGATACAGGAGCAGATGATACAGTATTAGAAGATATAAATTTGCCAGGAAAATGGAAACCAAAAATGATAGGGGGAATTGGAGGTTTTATCAAAGTAAGGCAATATGATCAGATAGYTATAGAAATCTGTGGAAAAARGGCTATAGGTACAGTGTTAGTAGGACCTACACCTGTCAATATAATTGGACGAAATATATTGACTCAGATTGGTTGCACTTTAAATTTTCCAATTAGTCCTRTTGATACTGTACCAGTAAAATTAAAGCCAGGAATGGATGGACCAAAGGTTAAACAGTGGCCATTRACAGAARARAAAATAAAAGCATTA…
303962_2018_AE	~~~~~~~~~~~~~~~TGGCAACGACCCSTTGTCACAATAAAAATAGAGGGACAGCTAAGAGAAGCTCTATTAGATACAGGAGCAGATGATACAGTATTAGAAGATATAAATTTGCCAGGAAAATGGAAACCAAAAATGATAGGGGGAATTGGAGGTTTTATCAAAGTAAGACAATATGATCAGATACTTATAGAAATTTGTGGAAAGAAGGCTATAGGTACAGTGTTAGTAGGACCTACACCTGTCAACATAATTGGACGAAATATGTTGAYTCAGCTTGGTTGTACCTTAAATTTTCCATTTAGTCYTATTGACACTGTACCAGTAACATTAAAGCCAGGAATGGATGGGCCAAARGTTAAACAGTGGCCAYTRACAGAAGAAAAAATAAAAGCATTA…
303960_2018_AE	~~~~~~~~~~~~~~~TGGCAACGACCCCTTGTCACAATAAAAATAGGAGGGCAGCTGAAAGAAGCTCTATTAGATACAGGAGCAGATGATACAGTGTTAGAAGATATAAATTTACCAGGAAAATGGAAACCAAAAATGATAGGGGGAATTGGAGGTTTTATCAAAGTAAGGCAATATGATCAGATACTTATAGAAATTTGTGGAAAAAAGGCTATAGGTACAGTGTTAGTAGGACCTACACCTGTCAACATAATTGGACGAAATATGTTGACTCAGATTGGTTGTACTTTAAATTTTCCAATTAGTCCTATTGACACTGTACCAGTAACATTAAAGCCAGGAATGGATGGACCAAAGGTTAAACAGTGGCCATTGACAGAAGAAAAAATAAAAGCATTA…
071011_2018_AE	cctcaaatcactctttggcaacgaccccttgtcacagtaaaaataggaggacagctaaaagaagctctattagatacaggagcagatgatacagtattagaagatataaatttgccaggaaaatggaaaccaaaa~tgatagggggaattggaggttttatcaaggtaaggcaatatgatcagatacttatagaaatttgtggaaaaaaggctataggtacagtgttagtaggacctacacctgtcaacataattggacgaaatatgttgactcagattggttgtactttgaatttcccaattagtcctattgacactgtaccagtaacattaaaaccaggaatggatggaccaaaggttaaacagtggccattgacagaagaaaaaataaaagcatta…
303989_2018_AE	~~~~~~~~~~~~~~~TGGCAACGACCCCTTGTCACAATAAAAATAGGAGGGCAGCTAAGRGAAGCTCTATTAGATACAGGAGCAGATGATACAGTATTAGAAGATATAAATTTGCCAGGAAAATGRAAACCAAAAATGATAGGGGGAATKGGAGGTTTTATCAAGGTAAGGCAATATGATCAGATACCTATAGAAATTTGTGGAAAAAGGGCWATAGGYACAGTGTTAGTAGGACCTACACCTGTCAACATAATTGGACGAAATATGTTGACTCAGCTTGGTTGTACTTTAAATTTCCCAATTAGTCCTATTGACACTGTACCAGTAACATTAAAACCAGGAATGGATGGACCAAAGGTTAAACAGTGGCCATTGACAGAAGAAAAAATAAAAGCATTA…
072417_2018_AE	~~~~~~~~~~~~~~~TGGCAACGACCCCTTGTCACAATAAgAATAGGAGGACAGCTGAAAGAAGCTCTATTAGATACAGGAGCAGATGATACAGTATTAGAAGATATAAATTTGCCAGGAAAATGGAAACCAAAAATGATAGGGGGAATTGGAGGTTTTATCAAAGTAAGGCAATATGATCAGATACTTATAGAAATTTGTGGAAARAAGGCTATAGGTACAGTGTTAGTAGGACCTACACCTGTCAACATAATTGGACGAAATATGTTGACTCAGATTGGTTGTACTTTAAATTTTCCAATTAGTCCTATTGACACTGTACCAGTAACATTAAAGCCAGGAATGGATGGACCAAAGGTTAAACAATGGCCATTGACAGAAGAAAAAATAAAAGCATTA…
072414_2018_AE	CCTCAAATCACTCTTTGGCAGCGACCTCTTGTCACAATAAAAATAGGAGGACAGCTGAAAGAAGCTCTATTAGATACAGGAGCAGATGATACAGTATTAGAAGATATAAATTTGCCAGGAAAATGGAAACCAAAATTGATTGGGGGAATTGGAGGTTTTATCAAAGTAAGGCAATATGATCAGATACTTATAGAAATTTGTGGAAAAAAGGCTATAGGTACAGTGTTAGTAGGACCTACACCTGTCAACATAATTGGACGAAATATGTTGACACAAATTGGTTGTACTTTAAATTTTCCAATAAGTCCTATTGACACTGTACCAGTAACATTAAAGCCAGGAATGGATGGACCAAAGGTTAAACAGTGGCCATTGACAGAAGAAAAAATAAAGGCATTA…
072404_2018_AE	~~~~~~~~~~~~~~~TGGCAACGACCCCTTGTCACAATAAAAATAGGGGGACAGCTAAGAGAAGCTCTATTAGATACAGGAGCAGATGATACAGTATTAGAAGATATAAATTTGCCAGGAAAATGGAARCCAAAAATGATAGGGGGAATTGGAGGTTTTATCAAGGTAAGGCAATATGATCAGATACCTATAGAAATTTGTGGGAAAAAGGCTATAGGTACAGTGTTAGTAGGACCTACACCTGTCAACATAATTGGACGAAATATGTTGACTCAGCTTGGTTGTACTTTAAATTTCCCAATTAGTCCTATTGACACTGTACCAGTAACATTAAAGCCAGGAATGGATGGACCAAAGGTTAAACAGTGGCCATTGACAGAAGAAAAAATAAAAGCATTA…
073115_2018_AE	~~~~~~~~~~~~~~~TGGCAACGACCCCTTGTCACAATAAAAATAGGGGGACAGCTGAGAGAAGCTCTATTAGATACAGGAGCAGATGATACAGTATTAGAAGATATAWATTTACCAGGAAAATGGAAACCAAAAATGATAGGGGGAATTGGAGGTTTTATCAAAGTAAGGCAATATGATCAGATACTGATAGAAATTTGTGGAAAAAAGGCTATTGGTACAGTGCTAGTAGGACCTACACCTGTCAACATAATTGGACGAAACATGTTGACTCAGCTTGGTTGTACTTTAAATTTTCCAATTAGTCCTATTGACACTGTACCAGTAACATTAAAACCAGGAATGGATGGACCAAAAGTTAAACAATGGCCATTGACAGAAGAAAAAATAAAAGCATTA…
323365_2018_AE	~~~~~~~~~~~~~~~TGGCAACGACCCGTTGTCACAGTAAAAATAGAGGGACAGCTGAAAGAAGCGCTATTAGACACAGGAGCAGATGATACAGTATTAGAAGATATAAATTTGCCAGGAAAATGGAAACCAAAAATGATAGGGGGAATTGGAGGTTTTATCAAAGTAAGACAATATGATCAGATACTTATAGAAATTTGTGGAAAAAGGGCTATAGGTACAGTGTTAGTAGGGCCTACACCTGTCAACATAATTGGACGAAATATGTTGACTCAGATTGGTTGTACTTTAAATTTTCCAATTAGTCCTATTGACACTGTACCAGTAAAATTAAAGCCAGGAATGGATGGACCAAAGGTTAAACAATGGCCATTGACAGAAGAAAAAATAAAAGCATTA…
080717_2018_AE	CCTCAAATCACTCTTTGGCAGCGACCCCTTGTCACAATAAAAATAGGAGGGCAGCTAAGAGAAGCTCTATTAGATACAGGAGCAGATGATACAGTATTAGAAGATATAAATTTGCCAGGAAAATGGAAACCAAAAATGATAGGGGGAATTGGAGGTTTTATYAAGGTAAGRCAATATGATCAGATACCTATAGAAATTTGTGGAAAAAAGGCTATAGGTACAGTGTTAGTAGGACCTACACCTGTCAACATAATTGGACGAAATATGTTGACTCAGCTTGGTTGTACTTTAAATTTCCCWATTAGTCCTATTGACACTGTACCAGTAACATTAAAGCCAGGAATGGATGGACCAAAGGTTAAACAGTGGCCATTGACAGAAGAAAAAATAAAAGCATTA…
304020_2018_AE	~~~~~~~~~~~~~~~TGGCARCGACCCCTTGTCACAATAAGARTAGGGGGACAACTRAAAGAAGCTCTATTAGATACAGGAGCAGATGATACAGTATTAGAAGATATAAATTTGCCAGGAAAATGGAAACCAAAAATGATAGGGGGAATTGGAGGTTTTATCAAAGTCAGGCAATATGATCAGATACTTATAGAAATTTGTGGAAARAAGGCTATAGGTACAGTGCTAGTAGGACCTACACCTGTCAACATAATTGGACGAAATATGTTGACTCAACTTGGTTGTACTTTAAATTTCCCCATTAGTCCTATTGAAACTRTACCAGTAAAATTAAAGCCAGGAATGGATGGACCAAAGGTTAAACAGTGGCCATTGACAGAAGAAAAAATAAAAGCATTA…
304026_2018_AE	~~~~~~~~~~~~~~~TGGCAGCGACCCCTTGTCACAATAAAAATAGGAGGACAGCTAAGAGAAGCTCTRTTAGATACAGGAGCAGATGATACAGTATTAGAAGATATAAATTTGCCAGGAAAATGGAAACCAAAAATGATAGGGGGAATTGGAGGTTTTATCAARGTAARRCAATATGATSAGATACYTATAGAAATTTGTGGRAAAAAGGCTATAGGTACAGTGTTAGTAGGACCTACACCTGTCAACATAATTGGACGAAATATGTTGACTCAGCTTGGTTGTACTTTAAATTTCCCAATTAGTCCTATTGACACTRTACCAGTAACATTAAAGCCAGGAATGGATGGACCAAAGGTTAAACAGTGGCCATTGACAGAAGARAAAATAAAAGCATTA…
304033_2018_AE	~~~~~~~~~~~~~~~TGGCAGCGACCCCTAGTCACARTAAAAATAGRAGGACAGCTAAGAGAAGCTCTATTAGACACAGGAGCAGATGATACAGTATTAGAAGAWATAAATTTGCCAGGAAAATGGAAACCAAAAATGATAGGGGGAATTGGAGGTTTTATCAAAGTAAGGCAATATGATCAGATAKCTATAGAAATTTGTGGAAAAARGGCTGTAGGTACAGTGTTAGTAGGACCTACACCTATCAACATAATTGGACGRAATATGTTGACTCAGCTTGGTTGTACTTTAAATTTCCCAATTAGTCCTATTGACACTGTACCAGTAAAATTAAAGCCAGGGATGGATGGACCAAAAGTCAAACAGTGGCCATTGACAGAAGAAAAAATAAAAGCMTTR…
304037_2018_AE	~~~~~~~~~~~~~~~TGGCAACGACCCCTTGTCACAATAAAAATAGGAGGACAGCTAAGAGAAGCTCTATTAGATACAGGAGCAGATGATACAGTATTAGAAGATATAAATTTACCAGGAAAATGGAAACCAAAAATGATAGGGGGAATTGGAGGWTTTATCAAAGTAAGGCAATATGATCAGATACCTATAGAAATTTGTGGACAGAAGGCTATAGGTACAGTGTTAGTAGGACCYACACCTGTCAACATAATTGGACGAAATATGCTGACCCAGATTGGTTGTACTTTAAATTTCCCAATTAGTCCTATTGACACTGTACCAGTAACATTAAAGCCAGGAATGGATGGACCAAAGGTTAAACAGTGGCCATTGACAGAAGAAAAAATAAAAGCATTA…
304046_2018_AE	~~~~~~~~~~~~~~~TGGCAACGACCCCTTGTCACAATAAAAATAGGAGGACAGCTGAAAGAAGCTCTATTAGATACAGGAGCAGATGATACAGTATTAGAAGATATAAATTTACCAGGAAAATGGAAACCAAAAATGATAGGGGGAATTGGAGGTTTTATCAAAGTAAGGCAATATGATCAGATACTTATAGAAATTTGTGGAAAAAAGGCTATAGGTACAGTGTTAGTAGGACCTACACCTGTCAACATAATTGGACGAAATATGTTGACTAAGATTGGTTGTACTTTAAATTTCCCAATTAGTCCTGTTGAAACTGTACCAGTAACATTAAAGCCAGGAATGGATGGACCAAAGGTTAAACAGTGGCCATTGACAGAGGAAAAAATAAMAGCATTA…
304056_2018_AE	~~~~~~~~~~~~~~~TGGCAACGACCCTTAGTTACAATAAGRATAGGGGGACAGCTAAGAGAAGCKCTATTAGATACAGGAGCAGATGATACAGTATTAGAAGATATAGATTTGCCAGGAAAATGGAAACCAAAAATGATAGGGGGRATTGGAGGTTTTATCAAAGTAAGGCAATATGATCAGATACCTATAGAAATTTGTGGAAAAAAGGCTATAGGTACAGTGTTAGTAGGACCTACACCTRTCAACATAATTGGACGAAATATGTTGACTCAGCTTGGKTGTACTTTAAATTTCCCAATTAGTCCTATTGACACTGTACCAGTAACATTAAAGCCAGGAATGGATGGRCCAAAGGTTAAACAGTGGCCATTGACAGAAGAAAAAATAAAAGCATTA…
304054_2018_AE	~~~~~~~~~~~~~~~TGGCAACGACCCCTTGTCACAATAAAAATAGGAGGACAGCTGAAAGAAGCTCTATTAGATACAGGAGCAGATGATACAGTATTAGAAGATATAAATTTGCCAGGAAAATGGAAACCAAAAATGATAGGGGGAATTGGAGGTTTTATCAAGGTAAGACAATATGATCAGATATCTATAGAAATTTGTGGGAAAAAGGCTATAGGTACAGTATTAGTAGGACCTACACCTGTCAACATAATTGGACGAAATATGTTGACTCAAATTGGTTGTACTTTAAATTTCCCAATTAGTCCTATTGATACTGTACCAGTAACATTAAAGCCAGGAATGGATGGACCAAAGGTTAAACAGTGGCCATTGACAGAAGAAAAAATAAAAGCATTA…
304047_2018_AE	~~~~~~~~~~~~~~~TGGCAACGACCCATTGTCACAGTAAAAATAGGAGGACAGCTGAAAGAAGCTCTATTAGATACAGGAGCAGATGATACAGTATTAGAAGATATARATTTGCCAGGAAAATGGAAACCAAAAATGATAGGGGGAATTGGAGGTTTTATCAAAGTAAGGCAATATGATCAGGTAYCTATAGAAATTTKTGGAAAAAGGGCTATAGGTACAGTGTTAGTAGGACCTACCCCTRTCAACATAATTGGACGAAATATGTTGACTCAGATTGGTTGTACTTTAAATTTGCCAATTAGTCCTATTGACACTGTACCAGTAACATTAAAGCCAGGAATGGATGGACCAAAAGTTAAACAGTGGCCATTGACAGAAGAAAAAATAARAGCATTA…
082810_2018_AE	CCTCAAATCACTCTTTGGCAGCGACCCCTCGTCACAATAAAAATAGAAGGACAGCTAAAAGAAGCTCTATTAGACACAGGAGCAGATGATACAGTATTAGAAGATATAAATTTGYCAGGAAAATGGAAACCAAGAATGATAGGGGGAATTGGAGGTTTTATCAAAGTAAGGCAATATGATCAGATACTWATAGAAATTTGTGGAAAAAGRGCTATAGGAACAGTGTTAGTAGGACCTACACCTGTCAACATAATTGGACGAAATATGTTGACTCAGATTGGTTGTACTTTAAACTTYCCAATTAGTCCTATTGACACTGTACCAGTAACATTAAAGCCAGGAATGGATGGACCAAAGGTTAAACAGTGGCCATTGACAGAAGAAAAAATAARRGCATTA…
090402_2018_AE	CCTCAAATCACTCTTTGGCAACGACCTSTTGTCACAATAARARTAGRAGRACAGCTGAGAGAAGCTCTATTAGATACAGGAGCAGATGATACAGTGTTAGAAGAKATAAATTTACCAGGGAAATGGAAACCAAAAATGATAGGGGGAATTGGAGGTTTTATCAAAGTAAGGCAATATGATCAGATACTTATAGAAATTTGTGGAAAAAAGGCTATAGGTACGGTGTTAGTAGGACCTACACCTGTCAACATAATTGGACGAAATATGTTGACTCARATTGGTTGTACTTTAAATTTTCCAATTAGTCCTATTGACACTGTACCAGTAAMATTAAAGCCAGGAATGGATGGACCAAAGGTTAAACAGTGGCCATTGACAGAAGAAAAAATAAAAGCATTA…
329194_2018_AE	~~~~~~~~~~~~~~~TGGCAACGACCCCTTGTCACAATAAAAATAGGAGGACAGCTAARAGAAGCTCTATTAGATACAGGAGCAGATGATACAGTATTAGAAGATATAAATTTGCCAGGAAAATGGAAACCAAAAATGATAGGGGGAATYGGAGGTTTTATCAAGGTAAGGCAATATGATCAGATAWCTATRGAAATTTGTGGAAAAAGGGCTATAGGTACAGTGTTAGTAGGACCTACACCTGTCAACATAATTGGACGRAATATGTTGACTCAGCTTGGTTGTACTTTAAATTTCCCAATTAGYCCTATTGACACTGTACCAGTAACAYTAAAGCCAGGAATGGATGGACCAAAGGTTAAACAGTGGCCATTGACAGAAGAAAAAATAAAAGCATTA…
091105_2018_AE	~~~~~~~~~~~~~~~TGGCAACGACCCCTTGTCACAGTAAAAATAGGAGGACAGCAGAGAGAAGCTCTATTAGATACAGGAGCAGATGATACAGTATTAGAAGACATAAATTTGCCAGGAAAATGGAAACCAAAATTGATAGGGGGAATTGGAGGTTTTATCAAAGTAAGGCAATATGATCAGATACTTATAGAAATTTGTGGAAAAAAGGCTATAGGTACAGTATTAGTAGGACCTACACCTGTCAACATAATTGGACGAAATATGTTGACACAGATTGGTTGTACTTTAAATTTTCCAATAAGTCCTATTGACACTGTACCAGTAACATTAAAGCCAGGAATGGATGGACCAAAAGTTAAACAGTGGCCATTGACAGAAGAAAAAATAAAAGCATTA…
091103_2018_AE	~~~~~~~~~~~~~~~TGGCAACGACCCCTTGTCACAGTAAAAATAGAAGGACAGCTAAAAGAAGCTCTATTAGATACAGGAGCAGATGACACAGTATTAGAAGATATAAATTTGCCAGGAAAATGGAAACCAAAAATGATAGGGGGAATTGGAGGTTTTATCAAGGTAAAGCAATATGATCAAATACTTATAGRAATTTGTGGAAAAAAGGCTATAGGTACAGTGTTAGTAGGACCTACACCTGTCAACATAATTGGACGAAATATGTTGACTCAGCTTGGTTGTACTTTAAATTTTCCAATTAGTCCTATTGACACTGTACCAGTAACTTTAAAGCCARGAATGGATGGCCCAAAGGTTAAACAGTGGCCATKGACAGAAGAAAAAATAAAAGCATTA…
304060_2018_AE	~~~~~~~~~~~~~~~TGGCAACGACCCCTAGTCACAATAAAAATAGGAGGACAGCTAAGAGAAGCTCTATTAGATACAGGAGCAGATGATACAGTATTAGAAGATATAAATTTGCCAGGAAAATGGAAACCAAAAATGATAGGGGGAATTGGAGGTTTTATTAAGGTAAGGCAATATGATCAGATACCTATTGAAATTTGTGGAAAAAAGGCTATAGGTACGGTGTTAATAGGACCTACACCTATCAACATAATTGGACGAAATATGTTGACTCAGCTTGGTTGTACTTTAAATTTCCCAATAAGTCCTATTGACACTGTACCAGTAACATTAAAGCCAGGAATGGATGGACCAAAAGTTAAACAGTGGCCATTGACAGAAGAAAAAATAAAAGCATTA…
323420_2018_AE	~~~~~~~~~~~~~~~TGGCAGCGACCCTTAGTCACAATAAAAATAGCAGGACAGTTRAAAGAAGCTCTATTAGATACAGGAGCAGATGATACAGTATTAGAAGAAATAAATTTGCCAGGAAAATGGAAACCAAAAATGATAGGGGGAATTGGAGGTTTTATCAAAGTAAGACAATATGATCAGATACTTATRGAAATTTGTGGAAAAAGGGCTATAGGCACAGTATTAGTAGGACCTACACCTGTCAACATAATTGGACGAAATATGTTGACTCARCTTGGTTGTACTTTAAATTTCCCAATTAGTCCTATTGAAACTGTACCAGTAACATTAAAGCCAGGAATGGATGGACCAAAGGTTAAACAATGGCCATTGACAGAAGAAAAAATAAAAGCATTA…
304079_2018_AE	~~~~~~~~~~~~~~~TGGCAACGACCCCTTGTCCCAGTAAAAATAGRAGGACAGCTAAGAGAAGCTCTATTAGATACAGGAGCAGATGATACAGTATTAGAAGATATAAATTTGCCAGGGAGATGGAAACCAAAAATGATAGGGGGAATTGGAGGTTTTATCAAAGTAAGGCAATATGATCARATATYTATAGAAATTTGTGGAAAAAAGGCTATAGGTACAGTGTTAGTGGGACCTACACCTGTCAACATAATTGGRCGAAATATGTTGACTCAGATTGGTTGTACATTAAATTTCCCAATTAGTCCTGTTGACACTGTACCAGTTWCATTAAAGCCAGGAATGGATGGACCAAAGGTTAAACAGTGGCCATTGACAGAAGAAAAAATAAAAGCATTA…
100903_2018_AE	~~~~~~~~~~~~~~~TGGCAGCGACCCCTTGTCACAATAAAAATAGGAGGAGAGTTGAGRGAAGCTCTAYTAGATACAGGAGCAGATGATACAGTATTAGAAGATATAAATTTGCCAGGAAAATGGAAACCAAAAATGATAGGGGGAATTGGAGGWTTTATCAAAGTAAGGCAATATGATCAGATACTTATAGAAATTTGTGGAAAAAAGGCTATAGGTACAGTGTTGGTAGGACCTACACCTATCAACATAATTGGACGAAATATGTTGACTCAGCTTGGTTGTACTTTAAATTTYCCAATTAGTCCTATTGACACTGTACCAGTAAAATTAAAGCCAGGAATGGATGGRCCAAAGGTTAAACARTGGCCAYTGACAGAAGAAAAAATAAAAGCATTA…
100929_2018_AE	CCTCAAATCACTCTTTGGCAACGACCCCTTGTCACAGTAAAAATAGGAGGACAGCTGAAAGAAGCTCTATTAGATACAGGAGCAGATGATACAGTATTAGAAGATATAAATTTGCCAGGAAAATGGAAACCAAAAATGATAGGGGGAATTGGAGGTTTTATCAAAGTAAAGCAATATGATCAGATACCTATAGAAATTTGTGGAAAAAAGGCTATAGGTACAGTGTTAGTAGGACCTACACCTGTCAACATAATTGGACGAAATATGTTGACTCAGATTGGTTGTACTTTAAATTTCCCAATTAGCCCTATTGACACTGTACCAGTAACATTAAAACCAGGAATGGATGGACCAAGGGTTAAACAGTGGCCATTAACAGAAGAAAAAATAGAAGCATTA…
100923_2018_AE	~~~~~~~~~~~~~~~TGGCAACGACCCCTTGTCACAGTAAAAGTAGGAGGACAGTTGAGAGAAGCTCTATTAGATACAGGAGCAGATGATACAGTATTAGAAGARATARATTTGCCAGGAAAATGGAAACCAAAAATGATAGGGGGAATTGGAGGTTTTATCAAAGTAAGACAATATGATSAGATACTTATAGAAATTTGTGGAAAAAGGGCTATAGGTACAGTRTTAGTAGGACCTACACCTGTCAACATAATTGGACGAAATATGTTGACTCAACTCGGTTGTACTTTAAATTTTCCAATTAGTCCTATTGACACTGTACCAGTAACATTAAAGCCAGGAATGGATGGACCAAAGGTTAAACARTGGCCATTAACAGAAGAAAAAATAAAAGCATTA…
323458_2018_AE	~~~~~~~~~~~~~~~TGGCAACGACCCCTTGTCACAATAAAAATAGAAGGACAGCTGAGAGAAGCTCTATTAGATACAGGAGCAGATGATACAGTATTAGAAGATATAAATTTGCCAGGAAAATGGAAACCAAAAATGATAGGGGGCATTGGAGGGTTTATCAAAGTAAGGCAATATGATCAGATACTTATAGAAATTTGTGGAAAAAGGGCTATAGGTACAGTGTTAGTAGGACCTACACCTGTCAACATAATTGGACGAAACATGTTGACTCAGCTTGGTTGTACCTTAAATTTTCCAATTAGTCCTATTGACACTGTACCAGTAACATTAAAGCCRGGAATGGATGGGCCAAAGGTTAAACAGTGGCCATTGACAGAAGAAAAAATAAAAGCATTA…
100937_2018_AE	~~~~~~~~~~~~~~~TGGCAACGACCCCTAGTCATAATAAAAATAGAAGGACAGCTAAAAGAAGCTCTATTAGATACAGGAGCAGATGATACAGTATTAGAAGATATAAATTTGCCAGGAAAATGGAAACCAAAAATGATAGGGGGAATTGGGGGTTTTATCAAAGTAAGGCAGTATGATCAGATACCTATAGAAATTTGTGGGAAAAAGGCTATAGGTACAGTGTTAGTAGGACCTACACCTGTCAACATAATTGGACGAAATATGTTGACTCAGATTGGTTGTACTTTAAATTTTCCAATTAGTCCTGTTGACACTGTACCAGTAACATTAAAACCAGGAATGGATGGACCAAGGGTTAAACAGTGGCCATTGACAGAAGAAAAAATTAAGGCATTA…
304080_2018_AE	~~~~~~~~~~~~~~~TGGCAACGACCCCTTGTCACAATAAAAATAGGAGGACAGTTGARAGAAGCTCTATTAGATACAGGAGCAGATGATACAGTATTAGAAGATATAAATTTGCCAGGAAAATGGAAACCAAAAATGATAGGGGGAATTGGAGGTTTTATTAAAGTAAGGCAATATGATCAGATACTCATAGAGATTTGTGGAAAAAAGGCTATAGGTACAGTGTTAGTAGGACCTACACCTGTCAACATAATTGGACGAAATATGTTGACTCAGCTTGGGTGTACTTTAAATTTTCCAATTAGTCCTATTGACACTGTACCAGTAACATTAAAGCCAGGAATGGATGGRCCAAAGGTYAAACAGTGGCCATTGACAGAAGAAAAAATAAAAGCATTA…
304107_2018_AE	~~~~~~~~~~~~~~~TGGCAACGACCCCTCGTCACAATAAGAGTAGAAGGACAGCTGAAAGAAGCTCTATTAGATACAGGAGCAGATGATACAGTGTTAGAAGAGATAAATTTACCAGGGAAATGGAAACCAAAAATGATAGGGGGAATTGGAGGTTTTATCAAGGTAAGGCAATATGAMCAARTACTTATAGAAATTTGTGGAAAAAAGGCTATAGGTACAGTGTTAGTAGGACCTACACCTGTCAACATAATTGGACGAAATATGTTGACTCAGCTTGGTTGTACTTTAAATTTTCCAATTAGTCCTATTGACACTGTACCAGTAACATTAAAGCCAGGAATGGATGGGCCAAAGGTTAAACAGTGGCCATTGACAGAAGAAAAAATAAAAGCATTW…
102301_2018_AE	CCTCAAATCACTCTTTGGCAACGACCCCTCATCCCAATAAAAATAGGAGGACAGGTGAGAGAAGCTCTATTAGATACAGGAGCAGATGACACAGTGTTAGAAGAGATAAATTTACCAGGAAGATGGAAACCAAAAATGATAGGGGGAATTGGAGGTTTTATCAAAGTAAGGCAATATGATCAGATATCTATAGAGATTTGTGGAAAAAAGGCTATAGGTACAGTGTTGGTAGGACCTACACCTGTYAACATAATTGGACGAAATATATTGACTCAGATTGGTTGTACTTTAAATTTTCCAATTAGTCCTATTGACACTGTACCAGTAACATTAAAGCCAGGAATGGATGGACCAAAGGTTAAACAGTGGCCATTGACAGAAGAAAAAATAAAAGCATTA…
304102_2018_AE	~~~~~~~~~~~~~~~TGGCAACGACCCCTTGTCACAATAAAAATAGGAGGACAGMTAAAAGAAGCTCTACTAGATACAGGAGCAGATGATACAGTATTAGAAGATATAAATTTGCCAGGAAAATGGAAACCAAAAATGATAGGGGGAATTGGAGGTTTTATCAAGGTAAGGCAATATGATCAGATATCTATAGAAATTTGTGGAAAAAAGGCTATAGGTACAGTGTTAGTAGGACCTACACCTGTCAACATAATTGGACGAAATTTGTTGACTCAGCTTGGTTGTACTTTAAATTTCCCAATTAGTCCTATTGACACTGTACCAGTAACATTAAAGCCAGGAATGGATGGACCAAAGGTTAAACAGTGGCCATTGACAGAAGAAAAAATAAAAGCATTA…
304106_2018_AE	~~~~~~~~~~~~~~~TGGCAACGACCCCTTGTCACAATAAAAATAGGAGGACAGCTAAAAGAAGCTCTACTAGATACAGGAGCAGATGATACAGTATTAGAAGATATAAATTTGCCAGGAAAATGGAAACCAAAAATGATAGGGGGAATTGGAGGTTTTATCAAGGTAAGGCAATATGATCAGATACCTATAGAAATTTGTGGAAAAAAGGCTATAGGTACAGTGTTAGTAGGACCTACACCTGTCAACATAATTGGACGAAATTTGTTGACTCAGCTTGGTTGTACTTTAAATTTCCCAATTAGTCCTATTGACACTGTACCAGTAACATTAAAGCCAGGAATGGATGGACCAAAGGTTAAACAGTGGCCATTGACAGAAGAAAAAATAAAAGCATTA…
103018_2018_AE	CCTCAAATCACTCTTTGGCAACGACCCCTTGTCACAATAAAAATAGAAGGACAGMTAAAAGAAGCTCTATTAGATACAGGAGCAGATGAYACAGTATTAGAAGATATAAATTTGCCAGGAAAATGGAAACCAAAAATGATAGGGGGAATTGGRGGTTTTATCAAAGTAAGGCAGTATGATCAGATACCTATAGAAATTTGTGGRAAAAAGGCTATAGGTACAGTGTTAGTAGGACCTACACCTGTCAACATAATTGGACGAAATATGTTGACTCAGCTTGGTTGTACTTTAAATTTTCCAATTAGTCCTRTTGACACTGTACCAGTAACATTAAAACCAGGAATGGATGGACCAAGGGTTAAACAGTGGCCATTRACAGAAGAAAAAATTAAAGCATTA…
304189_2018_AE	~~~~~~~~~~~~~~~TGGCAACGACCCGTTGTCACAGTAAAAATAGrRGGACAGCTGAAAGAAGCACTATTAGACACAGGAGCAGATGAYACAGTATTAGAAGATATAAATTTGCCAGGAATATGGAAACCAAAAATGATAGGGGGAATTGGAGGTTTTATCAAAGTAARACAATATGATSAGATAyYTATAGAAATTTGTGGAAAAAGGGCTATAGGTACAGTGTTAGTAGGRCCTACGCCTGTCAACATAATTGGACGAAACATGTTGACTCAGATTGGTTGTACTTTAAATTTTCCAATTAGTCCTATTGACACTGTACCAGTAAAATTAAAGCCAGGAATGGATGGRCCAAAGGTTAAACAATGGCCATTGACAGAAGAAAAAATAAAAGCATTA…
112017_2018_AE	CCTCAAATCACTCTTTGGCAACGACCCCTTGTCACAATAAAAATAGGAGGACAGCTAAGAGAAGCTCTATTAGATACAGGAGCAGATGATACAGTGTTAGAAGATATAAATTTGCCAGGAAAATGGAAACCAAAAATGATAGGGGGAATTGGAGGTTTTATCAAAGTAAGACAATATGATCAGATACCTATAGAAATCTGTGGAAAAAAGGCTATAGGTACAGTGTTAGTAGGACCTACACCTGTCAACATAATTGGACGAAATATGTTGACTCAGCTTGGGTGTACTTTAAATTTTCCAATTAGTCCTATTGACACTGTACCAGTCACATTAAAGCCAGGAATGGATGGACCAAAGGTTAAACAATGGCCATTGACAGAAGAAAAAATAAAAGCATTA…
304156_2018_AE	~~~~~~~~~~~~~~~TGGCAACGACCCGTTGTCACAGTAAAAATAGAGGGACAGCTGAAAGAAGCGCTATTAGACACAGGAGCAGATGATACAGTATTAGAAGATATAAATTTRCCAGGAAAATGGAAACCAAAAATGATAGGGGGAATTGGAGGTTTTATCAAAGTAAGRCAATATGATCAGATACTTATAGAAATTTGTGGAAAAAGGGCTATAGGTACAGTGTTAGTAGGGCCTACACCTGTCAACATAATTGGACGAAATATGTTGACTCAGATTGGTTGTACTTTAAATTTTCCAATTAGTCCTATTGACACTGTACCAGTAAAATTAAAGCCAGGAATGGATGGACCAAAGGTTAAACAGTGGCCATTGACAGAAGAGAAAATAAAAGCATTA…
112710_2018_AE	cctcaaatcactctttggcaacgacccgttgtcacaataaaaataggaggacagctaaaagaagctctattagatacaggagcagatgatacagtgttagaagatataaatttgccaggaaaatggaaaccaaaaatgatagggggaattggaggttttatcaaagtaaggcaatatgatcagatayctatagagatttgtggaaaaaaggctataggtacagtgttagtaggacctacacctgtcaacataattggacgaaatatgttgactcagattggttgtactttaaatttcccaattagtcctattgacactgtaccagtaacattaaaaccaggaatggayggaccaaargttaaacagtggccattgacagaagaaaaaataaaagcatta…
304185_2018_AE	~~~~~~~~~~~~~~~TGGCAACGACCCCTTGTCACAATAAAAATAGGAGGGCAGCTAAGAGAAGCTCTATTAGATACAGGAGCAGATGATACAGTATTAGAAGATATAAATTTGCCAGGAAAATGGAAACCAAAAATGATAGGGGGAATTGGAGGTTTTATCAAGGTAAGGCAATATGATCAGATACCTATAGAAATCTGTGGAAAAAAGGCTATAGGTACAGTGTTAGTAGGACCTACACCTGTCAACATAATTGGACGAAATATGTTGACTCAGCTTGGTTGTACTTTAAATTTCCCAATTAGTCCTATTGACACTGTACCAGTAACATTAAAGCCAGGAATGGATGGACCAAAGGTTAAACAGTGGCCATTGACAGAAGAAAAAATAAAAGCATTA…
304149_2018_AE	~~~~~~~~~~~~~~~TGGCAGCGACCCCTAGTCGCAATAAARATAGRAGGACAGKTGAAAGAAGCTCTATTAGATACAGGAGCAGATGATACAGTATTAGAAGATATAAATTTGCCAGGAAAGTGGAAACCAAAAATGATAGGGGGAATTGGAGGGTTTATCAAAGTAArACAATATGATCAGATACTTATAGAAATTTGTGGAAAAAARGCTATAGGTACGGTGTTAGTAGGACCTACACCTGTCAACATAATTGGACGAAATATGTTGACTCAGATTGGTTGTACTTTAAATTTCCCAATTAGTCCTATTGACACTGTACCAGTAAAATTAAAGCCAGGAATGGATGGACCAAARGTTAAACAGTGGCCCTTGACAGAAGAAAAAATAAAAGCATTA…
112702_2018_AE	cctcaaatcactctttggcaacgaccccttgtcacaataaaartagggggacagctgagagaagctctattagatacaggagcagatgatacagtattagaagatataaatttaccaggaaaatggaaaccaaaaatgatagggggaattggaggttttatcaaagtaaggcaatatgatcagatactgatagaaatttgtggaaaaaaggctattggtacagtgctagtaggacctacacckgtcaacataattggacgaaacatgttgaytcagcttggttgtactwtaaattttccaattagtcctattgacactgtaccagtaacattaaaaccaggaatggatggaccaaaagttaaacaatggccattgacagaagaaaaaataaaagcatta…
304158_2018_AE	~~~~~~~~~~~~~~~TGGCAACGACCCGTTGTCACAGTAAAAATAGAAGGACAGCTGAAAGAAGCTCTATTAGATACAGGAGCAGATGATACAGTATTAGAAGATATAAATTTGCCAGGAAAATGGAAACCAAAAATGATAGGGGGAATTGGAGGTTTTATCAAAGTAAGGCAATATGATCAGATACTTATAGAAATTTGTGRAAAAARGGCTATAGGTACAGTATTAGTAGGACCTACGCCTGTCAACATAATTGGACGAAATATGTTGACTCAGATTGGTTGTACTTTAAATTTTCCAATTAGTCCTATTRRCACTRTACCAGTAAAATTAAAGCCAGGAATGGATGGACCAAAGGTTAAACAGTGGCCATTAACAGAAGAAAAAATAAAAGCATTA…
130064_2018_AE	cctcaaatcactctttggcaacgaccccttgtcacaataaaagtaggaggagagttgagagaagctctattagatacaggagcagatgatacagtgttagaagacataaatttaccaggaaaatggaaaccaaaaatgatagggggaattggaggttttatcaaggtaaggcaatatgatcaaatacttatagaaatttgtggaaaaaaggctataggtacagtgttagtaggacctacacctgtcaacataattggacgaaacatgttgactcagcttggttgtactttaaattttccaattwgtsctattgaccctgtacccgtaacattaaagccaggaatggatggaccaaaggttaaacagtggccattgacagaagaaaaaataaaagcatta…
304160_2018_AE	cctcaaatcactctttggcaacgaccccttgtcacaataagaatagaaggacagctaaaagaagctctattagatacaggagcagatgatacagtattagaagatataaatttgccaggaaaatggaaaccaaaaatgatagggggaattggaggttttatcaaagtaagacaatatgatgagatacttatagaaatttgtggaaaaaaggctataggtacagtgttagtgggacctacacctgtcaacataattggacgaaatatgttgactcagcttggttgtactttaaattttccaatcagtcctattgrtactgtaccagtaaaattaaagccaggaatggatggcccaaaggttaaacaatggccattgacaaaagagaaaatagaagcatta…
120417_2018_AE	CCTCAAATCACTCTTTGGCAACGACCCATAGTCACAATAAAAATAGGAGGACAGCTAAAAGAAGCTCTATTAGATACAGGAGCAGATGATACAGTATTAGAAGATATAAATTTGCCAGGAAAATGGAAACCAAAAATGATAGGGGGAATTGGAGGTTTTATCAAAGTAAGGCAATATGATCAGATACTTATAGAAATTTGTGGAAAAAAGGCTATAGGTACAGTGTTAGTAGGACCTACACCTGTCAACATAATTGGACGAAACATGCTGACTCAGCTTGGTTGTACTTTAAACTTTCCAATTAGTCCTATTGACACTGTACCAGTAACATTAAAGCCAGGAATGGATGGACCAAAGGTTAAACAGTGGCCATTGACAGAAGAAAAAATAAAAGCACTA…
120427_2018_AE	cctcaaatcactctttggcagcgaccccttgtcccaataaaagtagaaggacagttgagagaagctctactagacacaggagcagatgatacagtattagaagatataaatttgccaggaaaatggaaaccaaaaatgatagggggaattggaggttttatcaaagtaaggcaatatgatcagatacttatagaaatttgtggaaaaaaggctataggtacagtgttggtaggacctacacctgtcaacataattggacgaaacatgttgactcagcttggttgtactttaaatttcccaattagtcctattgacactgtaccagtaacattaaagccaggaatggatggaccaaaggttaaacagtggccattgacagaagaaaaaataaaagcatta…
323543_2018_AE	cctcaaatcactctttggcaacgaccccttgtcacagtaaaaatagggggacaactaaaagaagctctattagatacaggagcagatgatacagtattagaagatataaatttacccaggaaaakggaacccaaaatgatagggggaattggaggttttatcaaagtaaggcaatatgagcagatacttatagagatttgtggaaaacaggctataggtacagtgctagtaggacctacacctgtcaacataattggacgaaatttgttgactcagcttgggtgtactttaaatttcccaattagtcctattgacactgtaccagtaacattaaagccaggaatggatggaccaaaggttaaacagtggccattgacagaagaaaaaataaaagcatta…
121110_2018_AE	CCTCAAATCACTCTTTGGCAACGACCCCTTGTCACAATAAAAATAGRAGGACAGCTRAGAGAAGCTCTATTAGATACAGGAGCAGATGATACAGTATTAGAAGATATAAATTTGYCAGGAAAATGGAAACCAAAAATGATAGGGGGAATTGGAGGTTTTATYAAAGTAAGGCAATATGAYCAGRTACTCATAGAGATTTGTGGRAAAAAGGCTATAGGTACAGTGTTAGTAGGACCTACACCTGTYAACATAATTGGACGAAATATGTTGACTCAGMTTGGGTGTACTTTAAATTTTCCAATTAGTCCTATTGACACTGTACCAGTAAMATTAAARCCMGGAATGGATGGACCAAAGGTTAAACARTGGCCATTGACAGAAGAAAAAATAAAAGCATTA…
121103_2018_AE	cctcaaatcactctttggcaacgaccccttgtcacaataaaaatagggggacagctaagagaagctctattagatacaggagcagatgatacagtattagaagatataaatttgccaggaaaatggaaaccaaaaatgatagggggaattggaggttttatcaaggtaaggcaatatgatcagatacctatagaaatttgtgggaaaaaggctataggtacagtgttagtaggacctacacctgtcaacataattggacgaaatatgttgactcagcttggttgtactttaaatttcccaattagtcctattgacactgtaccagtaacattaaagccaggaatggatggaccaaaggttaaacagtggccattgacagaagaaaaaataaaagcatta…
304187_2018_AE	~~~~~~~~~~~~~~~TGGCAACGACCCCTTGTCACAATAAAAATAGGAGGACAGCTGAGAGAGGCTCTATTAGATACAGGAGCAGATGATACAGTATTAGAAGATATAAATTTGCAAGGAAAATGGAAACCAAAAATGATAGGGGGAATTGGAGGTTTTATAAAAGTAAGGCAATATGATCAGATACAGATAGAAATCTGTGGAAAAAAGGCTATAGGTACAGTGTTAGTAGGACCTACACCTGTCAACATAATTGGACGAAATATGTTGACTCAGATTGGTTGTACTTTAAATTTTCCAATCAGTCCTATTGACACTGTACCAGTAAAATTAAAGCCAGGAATGGATGGGCCAAAGGTTAAACAGTGGCCATTGACAGAAGAAAAAATAAAAGCATTA…
304182_2018_AE	~~~~~~~~~~~~~~~TGGCARCGACCCCTCATCCCAGTAAAAATAGGRGGACAGGTGARAGAAGCTCTATTAGATACAGGAGCAGATGATACAGTGTTAGAAGATATAAATTTACCAGGAAAATGGAAGCCAAAAATGATAGGGGGAATTGGAGGTTTTATCAAAGTAAGACAATATGATCAGATACTTATAGAAATTTATGGAAAAAAGGCTATAGGTACAGTGTTAGTAGGACCTACACCTATCAACATAATTGGACGAAATATGTTGACTCAGATTGGTTGTACTTTAAATTTTCCAATTAGTCCTATTGACACTGTGCCAGTAACATTAAAGCCAGGAATGGATGGGCCAAAGGTTAAACAGTGGCCATTGACAGAAGAAAAAATAAAAGCATTA…
303837_2018_AE	~~~~~~~~~~~~~~~TGGCAGCGACCCATTGTCACAATAAAAATAGGAGGACAGCTAAGAGAAGCTCTATTAGATACAGGAGCAGATGATACAGTATTAGAAGACATAAATTTGCCAGGAAAATGGAAACCAAAAATGATAGGGGGAATTGGAGGTTTTATCAAGGTAAGGCAATATGATCAGGTACCTATAGAAATTTGTGGGAAAAGGGATATAGGTACAGTGTTAGTAGGACCTACACCTGTCAACATAATTGGACGAAATATGTTGACTCAGCTTGGTTGTACTTTAAATTTCCCAATTAGTCCTATTGACACTGTACCAGTAACATTAAAGCCAGGAATGGATGGACCAAAGGTTAAACAGTGGCCAYTGACAGAAGAAAAAATAAAAGCATTA…
303942_2018_AE	~~~~~~~~~~~~~~~TGGCAACGACCCCTKGTCACAATAAAAATAGAGGGACAACTAAGAGAAGCTCTATTAGATACAGGAGCAGATGATACAGTATTGGAAGATATAAATTTGCCAGGAAAATGGAAACCAAAAATGATAGGGGGAATTGGAGGTTTTATCAAAGTAAGGCAATATGATCAGATACTYATAGAAATTTGTGGAAAAAAGGCTATAGGTACAGTGTTAGTAGGACCTACACCTGTCAACATAATTGGACGAAACATGTTRACTCAACTTGGTTGTACTTTAAATTTYCCCATTAGTCCTATTGACACTGTAYCAGTAAAATTAAAGCCAGGAATGGATGGCCCAAAGGTTAAACAGTGGCCATTGACAGAAGAAAAAATAAAAGCATTA…
303947_2018_AE	~~~~~~~~~~~~~~~TGGCAACGACCCCTTGTCACAATAAAAATAGAGGGACAACTAAGAGAAGCTCTATTAGATACAGGAGCAGATGAYACAGTATTGGAAGATATAAATTTGCCAGGAAAATGGAAACCAAAAATGATAGGGGGAATTGGAGGTTTTATCAAAGTAAGGCAATATGATCAGATACTTATAGAAATTTGTGGAAAAAAGGCTATAGGTACAGTGTTAGTAGGACCTACACCTGTCAACATAATTGGACGAAACATGTTRACTCAACTTGGTTGTACTTTAAATTTCCCCATTAGTCCTATTGACACTGTACCAGTRAAATTAAAGCCAGGAATGGATGGCCCAAAGGTTAAACARTGGCCATTGACAGAAGAAAAAATAAAAGCATTA…
303961_2018_AE	~~~~~~~~~~~~~~~TGGCAACGACCCCTTGTCACAATAAAAATAGGAGGGCAGCTAAGAGAAGCTCTATTAGATACAGGAGCAGATGATACAGTATTAGAAGATATAAATTTGCCAGGAAAATGGAAACCAAAAATGATAGGGGGAATTGGAGGTTTTATCAAGGTAAGGCAATATGATCAGATACCTATAGAAATTTGTGGAAAAAAGGCTATAGGTACAGTGTTAGTAGGACCTACACCTGTCAACATAATTGGACGAAATATGTTGACTCAGCTTGGTTGTACTTTAAATTTCCCAATTAGTCCTATTGACACTGTACCAGTAACATTAAAGCCAGGAATGGATGGACCAAAGGTTAAACAGTGGCCATTAACAGAAGAAAAAATAAAAGCATTA…
304028_2018_AE	~~~~~~~~~~~~~~~TGGCARCGACCCGTTGTCACAGTGAGAATAGAAGGACAGCTGAWAGAAGCTCTATTAGATACAGGGGCAGATGATACAGTATTAGAAGATATAAATTTGCCAGGAAAATGGAAACCAAAAATGATAGGGGGAATTGGAGGTTTTATCAAAGTAAGGCAATATGATCAGATACTTATAGAAATTTGTGGAAAACAGGCTAKAGGTACAGTGTTAGTAGGACCTACACCTGTCAACATAATTGGACGAAATATGTTGACTCAGATTGGTTGTACTTTAAATTTTCCAATTAGTCCTGTTGACACTGTACCAGTAAAATTAAAGCCAGGAATGGATGGACCAAAGGTCAAACARTGGCCATTGACAGAAGAAAAAATAAAAGCACTA…
304110_2018_AE	~~~~~~~~~~~~~~~TGGCAACGACCCCTTGTCACAATAAAAATAGGRGGACAGCTAAGAGAAGCTCTAYTAGATACAGGAGCAGATGATACAGTATTAGAAGATATAAATTTGCCAGGAAAATGGAAACCAAAAATGATAGGGGGAATTGGAGGTTTTATCAAAGTAAGGCAATATGATCAGATACTTATAGAAATTTGTGGAAAAAAGGCTATAGGTTCAGTGTTGGTAGGACCTACACCTGTCAACATAATTGGAAGAAATATGTTGACTCAGCTTGGTTGTACTTTAAATTTCCCAATTAGTCCTATTGACACTGTACCAGTAAAATTAAAGCCAGGAATGGATGGACCAAAGGTTAAACAGTGGCCATTGACAGAAGAAAAAATAAAAGCATTA…
304153_2018_AE	~~~~~~~~~~~~~~~TGGCAACGACCCCTTGTCACAGTAAAAATAGGAGGGCAGATAAAAGAAGCTCTACTAGATACAGGAGCAGATGATACAGTATTAGAAGATATAAATTTACCAGGAAAATGGAAACCAAAAATGATAGGGGGAATTGGAGGTTTTATCAAGGTAAGGCAATATGATCAGATACTTATAGAAATTTGTGGGAAAAAAGCTATAGGTACAGTGTTAGTAGGACCTACACCCGTCAACATAATTGGACGAAATATGTTGACTCAAATGGGTTGCACTTTAAATTTCCCAATTAGCCCTATTGACACTGTACCAGTAACATTAAAGCCAGGGATGGATGGACCAAAGGTTAAACAGTGGCCATTGACAGAAGAAAAAATAAAAGCATTA…
310024_2018_AE	~~~~~~~~~~~~~~~TGGCAACGACCCGTTGTCACAGTAAAAATAGAAGGACAGCTGAAAGAAGCACTATTAGACACAGGAGCAGATGATACAGTATTAGAAGATATAAATTTGCCAGGAAAATGGAAACCAAAAATGATAGGGGGAATTGGAGGTTTTATCAAAGTGAGACAATATGATCAGATACTTATAGAAATTTGCGGAAAAAGGGCTATAGGTACAGTGTTAGTAGGGCCTACGCCTGTCAACATAATTGGACGAAATATGTTGACTCAAATTGGTTGTACTTTAAATTTTCCAATAAGTCCTATTGACACTGTACCAGTAAAATTAAAACCAGGAATGGATGGACCAAAGGTTAAACAGTGGCCATTGACAGAAGAAAAAATAAAAGCATTA…
304228_2019_AE	~~~~~~~~~~~~~~~TGGCAACGACCCCTTGTCTCAATAAAAATAGGAGGACAGATAAAAGAAGCTCTATTAGACACAGGAGCAGATGATACAGTACTAGAAGATATAAATTTGCCAGGGAAATGGAAACCAAAAATGATAGGGGGAATTGGGGGTTTTATCAARGTAAAGCAATATGATCAGATACCTATAGAGATTTGTGGAAAAAAGGCTATAGGTACAGTGTTAGTAGGACCTACRCCTATCAACATAATTGGACGAAATATGTTGACTCAGCTTGGTTGTACTTTAAATTTCCCAATTAGCCCTATTMRCACTGTACCAGTAAAATTAAAGCCAGGAATGGATGGACCAAAGGTTAAACAGTGGCCATTAACAGAAGAGAAAATAAAAGCATTA…
304206_2019_AE	~~~~~~~~~~~~~~~TGGCAACGACCCGTTGTCACAGTAAAAATAGAAGGACAGCTGAAAGAAGCATTATTAGACACAGGAGCAGATGATACAGTATTAGAAGATATAAATTTGCCAGGAAAATGGAAACCAAAAATGATAGGGGGAATTGGAGGTTTTATTAAAGTAAGACAATATGATCAGATACTTATAGAAATTTGTGGAAAAAGGGCTATAGGTACAGTGTTAGTAGGGCCTACACCTGTCAACATAATTGGACGAAATATGTTGACTCAGATTGGTTGTACTTTAAATTTTCCAATTAGTCCTATTGACACTGTACCAGTAAAATTGAAGCCAGGAATGGATGGACCAAAGGTTAAACAATGGCCATTGACAGAAGAGAAAATAAAAGCATTA…
323591_2019_AE	~~~~~~~~~~~~~~~TGGCAACGACCCCTTGTCACAATAAAAATAGGAGGACAGCTAAGAGAAGCTCTATTAGACACAGGAGCAGATGATACAGTATTAGAAGATATAAATTTGCCAGGAAAATGGAAACCAAAAATGATAGGGGGAATTGGAGGTTTTATCAAGGTAAGGCAATATGATCAGATATCTATAGAAATTTGTGGAAAAAAGGCTACAGGTACAGTGTTAGTAGGACCTACACCTGTCAACATAATTGGACGAAATATGTTGACTCAGATTGGTTGTACTTTAAATTTCCCAATTAGTCCTATTGACACTATACCAGTAACATTAAAGCCAGGAATGGATGGACCAAAGGTTAAACAGTGGCCATTGACCGAAGAAAAAATAAAAGCATTA…
304213_2019_AE	~~~~~~~~~~~~~~~TGGCAACGACCCCTTGTCACAATAAAAATAGGAGGACAGYTGAGAGAAGCTCTATTAGAYACAGGAGCAGATGATACAGTATTAGAAGATATAAATTTGCCAGGGAAATGGAAACCAAAAATGATAGGGGGAATTGGAGGTTTTATCAAAGTAAGRCAATATGATCAGATACTTATAGAAATTTGTGGAAAAAAGGCTATAGGTACAGTGTTAGTGGGACCTACACCTGTCAACATAATTGGACGAAATATGTTGACTCAGCTKGGTTGTACATTAAATTTCCCAATTAGTCCTRTTGACACTGTACCAGTTAMATTAAAGCCAGGAATGGATGGACCAAAGGTTAAACAGTGGCCATTGACAGAAGAAAAAATAAAAGCATTA…
619021_2019_AE	CCTCAAATCACTCTTTGGCAACGACCCGTTGTCACAGTAAAAATAGAGGGACAGCTGAAAGAAGCGCTATTAGACACAGGAGCAGATGATACAGTATTAGAAGATATAAATTTACCAGGAAAATGGAAACCAAAAATGATAGGGGGAATTGGAGGTTTTATCAAAGTAAGACAATATGATCAGATACTTATAGAAATTTGTGGAAAAAGGGCTATAGGTACAGTGTTAGTAGGGCCTACACCTGTCAACATAATTGGACGAAATATGTTGACTCAGATTGGTTGTACTTTAAATTTTCCAATTAGTCCTATTGACACTGTACCAGTAAAATTAAAGCCAGGAATGGATGGACCAAAGGTTAAACAGTGGCCATTGACAGAAGAGAAAATAAAAGCATTA…
323606_2019_AE	~~~~~~~~~~~~~~~TGGCAACGACCCCTTGTCACAGTAAAAGTAGGAGGACAGTTGAGAGAAGCTCTATTAGATACAGGAGCAGATGATACAGTATTAGAAGACATAGAKTTGCCAGGAAAATGGAAACCAAAAATGATAGGGGGAATTGGAGGTTTTATCAAAGTAAGACAATATGATCAGATACTTATAGAAATTTGTGGAAAAAGGGCTATAGGTACAGTATTAGTAGGACCTACACCTRTCAACATAATTGGACGAAATATGTTGACTCAACTCGGTTGTACTTTAAATTTTCCAATTAGTCCTATTGACACTGTACCAGTAAAATTAAARCCAGGAATGGATGGACCAAAGGTTAAACAGTGGCCATTAACAGAAGAAAAAATAAAAGCATTA…
012204_2019_AE	CCTCAAATCACTCTTTGGCAGCGACCTCTTGTCACAATAAAAATAGGAGGACAGCTGARAGAAGCTCTATTAGATACAGGAGCAGATGATACAGTATTAGAAGATATAAATTTGCCAGGAAAATGGAAACCAAAAWTGATTGGGGGAATTGGAGGTTTTATCAAAGTAAGGCAATATGATCAGATACTTATAGAAATTTGTGGAAAAAAGGCTATAGGTACAGTGTTAGTAGGACCTACACCTGTCAACATAATTGGACGAAATATGTTGACACAAATTGGTTGTACTTTAAATTTTCCAATAAGTCCTATTGACACTGTACCAGTAACATTAAARCCAGGAATGGATGGACCAAAGGTTAAACAGTGGCCATTGACAGAAGAAAAAATAAAAGCATTA…
304237_2019_AE	~~~~~~~~~~~~~~~TGGCAACGACCCCTTGTCACAATAAAARTAGGAGGACAGCTAARAGAAGCCCTGTTAGAYACAGGAGCAGATGATACAGTATTAGAAGAAATAAATTTGCCAGGAAAATGGAAACCAAAAWTAATAGGGGGAATTGGAGGTTTTATCAARGTAAGGCAATATGATCAGATAACTCTAGAAATTTGTGGAAAAAAGGCTATAGGTACAGTRTTAGTAGGACCTACACCTGTCAACATAATTGGACGTAATATGTTGACTCAGCTTGGTTGTACTTTAAATTTYCCAATTAGTCCTATTGACACTGTACCAGTAACATTAAAGCCAGGAATGGATGGACCAAAGGTTAAACAGTGGCCATTGACAGAAGARAAAATAAAAGCATTA…
020104_2019_AE	CCTCAAATCACTCTTTGGCAACGGCCCCTTGTCACAATAAAAATAGGAGGGCAGTTGATAGAAGCTCTATTAGATACAGGAGCAGATGATACAGTGTTAGAAGATATAAATTTACCAGGAAAATGGAAACCAAAAATGATAGGGGGAATTGGAGGATTTATCAAAGTAAGGCAATATGATCAGATACCTATAGAAATTTGTGGAAAAAAGGCTATAGGTACAGTGTTAGTAGGACCTACACCTGTCAACATAATTGGACGAAATATGTTGACTCAGATTGGTTGTACTTTAAATTTTCCAATTAGTCCTATTGACACTGTACCAGTAACATTAAAACCAGGAATGGATGGACCAAAGGTTAAACAGTGGCCATTGACAGAAGAAAAAATAAAAGCATTA…
304252_2019_AE	~~~~~~~~~~~~~~~TGGCAACGACCCCTCGTCACAATAAGAGTAGGGGGASAGCTGAGAGAAGCTCTATTAGATACAGGAGCAGATGATACAGTGTTAGARGATATARAKTTACCAGGAAAATGGAAACCAAAAATGATAGGGGGAATTGGAGGTTTTATCAAGGTAAGGCAATATGATCAAATACTTATAGAAATTTGTGGAAAAAAGGCTATAGGTACAGTRTTAGTAGGACCTACACCTRTCAACATAATTGGACGAAATATGTTGACTCAGMTTGGTTGTACTTTAAATTTTCCAATTAGTCCTATTGCYACTGTACCAGTAACATTAAAGCCAGGAATGGATGGGCCAAAGGTTAAACAGTGGCCATTGACAGAAGAAAAAATAAAAGCATTA…
304241_2019_AE	~~~~~~~~~~~~~~~TGGCAACGACCCmTTGTCACAATAARAGTAGGAGGACAGTTGAGAGAAGCTCTATTAGATACAGGAGCAGATGATACAGTGTTAGAAGACATAAATTTACCAGGAAAATGGAAACCAAAAATGATAGGGGGAATTGGAGGTTTTATCAAGGTAAGGCAATATGAKCAAATACTTATAGAAATTTGTGGAAAAAAGGCTATAGGTACAGTGTTAGTAGGACCTACACCTGTCAACATAATTGGACGAAACATGTTGACTCAGCTTGGTTGYACTTTAAATTTTCCAATTAGTCCTATTGACCCTGTACCCGTAACATTAAAGCCAGGAATGGATGGRCCAAAGGTTAAACAGTGGCCATTGACAGAAGAAAAAATAAAAGCATTA…
304264_2019_AE	~~~~~~~~~~~~~~~TGGCAGCGACCAGTTGTCACAGTAAAAATAGAAGGACAGCTGAGAGAAGCTCTATTAGATACAGGAGCAGATGATACAGTATTAGAAGATATAAATTTGCCAGGAAAATGGAAACCAAAAATGATAGGGGGAATTGGAGGTTTTATCAAAGTAAGGCAATATGATCAGATACTTATAGAAATTTGTGGAAAAARGGCTRTAGGTACAGTGTTAGTAGGGCCTACACCTGTCAACATAATTGGACGAAATATGTTGACTCAGATTGGYTGTACTTTAAATTTTCCAATTAGTCCTATTGACACTGTACCAGTAAAATTAAAGCCAGGAATGGATGGACCAAAGGTTAAACAGTGGCCATTGACAGAAGAAAAAATAAAAGCATTA…
619046_2019_AE	CCTCAAATCACTCTTTGGCAACGACCCCTTGTCACARTAAAAATAGARGGACAGCTRARAGAAGCTCTATTAGATACAGGAGCAGATGAYACAGTATTAGAAGAKATAAATTTACCAGGAAARTGGAAACCAAAAATGATAGGGGGAATTGGAGGTTTTATCAAAGTAAGGCAATATGATCAGATACTTATAGAAATTTGTGGAAAAAAGGCTATAGGTACAGTGTTGGTAGGACCTACACCTGTCAACATAATTGGACGAAATATGTTGACTCAGCTTGGTTGTACTTTAAATTTYCCAATTAGTYCTATTGACACTGTACCAGTAACATTAAAGCCAGGAATGGATGGACCAAAGGTTAAACAGTGGCCATTGACAGAAGAAAAAATAAAAGCATTA…
304272_2019_AE	~~~~~~~~~~~~~~~TGGCAACGACCCCTTGTCACAATAAAAATAGAGGGACAGCTGAAGGAGGCGCTATTAGATACAGGAGCAGATGATACAGTATTAGAAGATATAAATTTGCCAGGAAAATGGAAACCAAAAATGATAGGGGGAATTGGAGGTTTTATCAAAGTAAGACAATATGATCAGATACTTATAGAAATTTGTGGAAAAAGGGCTATAGGTACAGTGTTAGTAGGACCTACACCTATCAACATAATTGGGCGAAATATGTTGACTCAGATTGGTTGTACTTTAAATTTCCCAATTAGTCCTATTGATACTGTACCAGTAACATTAAAACCAGGAATGGATGGACCAAAGATTAAACAGTGGCCATTGACAGAAGAAAAAATAAAAGCATTA…
304384_2019_AE	~~~~~~~~~~~~~~~TGGCAACGACCCCTAGTCAAAATAAAAATAGGGGGAGAGCTAAAAGAAGCTCTATTAGATACAGGAGCAGATGATACAGTATTAGAAGATATAAATTTGCCAGGAAAATGGAAACCAAAAATGATAGGGGGAATTGGAGGTTTTATCAAGGTAAGACAATATGATCAGATACCTATAGAAATTTGTGGAAAAAAGGCTATAGGAACAGTGTTAGTAGGACCTACACCTGTCAACATAATTGGACGAAATATGTTGACTCAGCTTGGTTGTACTTTAAATTTCCCAATTAGTCCTATTGACACTGTACCAGTAAAGCTAAAGCCAGGAATGGATGGACCAAAGGTTAAACAATGGCCATTAACAGAAGAGAAAATAAAAGCATTA…
030506_2019_AE	CCTCAAATCACTCTTTGGCAACGACCCATTGTCACAATAAAAATAGGAGGACAGCTAAAAGAAGCTCTATTAGATACAGGAGCAGATGATACAGTATTAGAAGATATAAATTTGCCAGGAAAATGGAAACCAAAAATGATAGGGGGAATTGGAGGTTTTATCAAGGTAAGGCAATATGATCAGATAACTATAGAAATTTGTGGAAAAAGGGCTACAGGTACAGTGTTAGTAGGACCTACACCTGTCAACATAATTGGACGAAATATGTTGACTCAGATTGGTTGTACTTTAAATTTACCGATTAGTCCTATTGACACTRTACCAGTAACATTAAAGCCAGGAATGGATGGGCCAAAGGTTAAACAGTGGCCATTGACAGAAGAAAAAATAAAAGCATTA…
304282_2019_AE	~~~~~~~~~~~~~~~TGGCAACGACCCCTAGTCACAATAAAARTAGGGGGACAGCTAAAAGAAGCTTTATTAGATACAGGAGCAGATGATACAGTATTAGAAGATATAAATTTGCCAGGAAAATGRAAACCAAAAATGATAGGGGGAATTGGAGGTTTTATCAARGTAAGGCAATATGATCAGATACCTATARAAATTTGTGGRAAAARGGCTATAGGTACAGTGTTRGTAGGACCTACACCTGTCAACATAATTGGACGAAATATGTTGACTCAGCTTGGTTGTACTTTAAATTTCCCAATTAGTCCTATTARCACTATACCAGTAACATTAAARCCAGGAATGGATGGACCAAAGRTTAAACAGTGGCCATTGRCAGCAGAAAAAATAAAAGCATTA…
619031_2019_AE	CCTCAAATCACTCTTTGGCARCGACCCATCGTCACAGTAARAATAGGAGGACAGCTGAAAGAGGCTCTATTAGATACAGGAGCAGATGATACAGTATTAGAAGAAATAAATTTGCCAGGAAAATGGAAACCAAAAATGATAGGGGGAATTGGAGGTTTTATCAAGGTAAGGCAATATGATCAGATACTTATAGAAATTTGTGGAAAAAAGGCTATAGGTACAGTGTTAGTAGGACCTACACCTGTCAACATAATTGGACGAAAYATGTTGACTCAGATTGGTTGTACTTTAAATTTCCCAATTAGTCCTATTGACACTGTACCAGTAAAATTAAAGCCAGGAATGGACGGACCAAAAGTTAAACAGTGGCCATTGACAGAAGAAAAAATAAAAGCATTA…
619049_2019_AE	CCTCAAATCACTCTTTGGCAACGACCCCTTGTCACAATAAAAATAGGAGGACAGCTGAAAGAAGCTCTATTAGATACAGGAGCAGATGATACAGTGTTAGAAGATATAAATTTACCAGGAAAATGGAAACCAAAAATGATAGGGGGAATTGGAGGTTTTATCAAAGTAAGRCAATATGATCAGATACTTATAGAAATTTGTGGAAAAAAGGCTATAGGTACAGTGTTAGTAGGACCTACACCTGTCAACATAATTGGACGAAATATGTTGACTCAGCTTGGTTGTACTTTAAATTTTCCAATAAGTCCTATTGACACTGTACCAGTAACATTAAAACCAGGAATGGATGGACCAAAGGTTAAACAGTGGCCATTGACAGAAGAAAAAATAAAAGCATTA…
032610_2019_AE	CCTCAAATCACTCTTTGGCAACGACCCCTAGTCACAATAAAAATAGGAGGACAGCTAAAAGAAGCTCTATTAGATACAGGAGCAGATGATACAGTATTAGAAGATATAAATTTGCCAGGAAAATGGAAACCAAAAATGATAGGGGGAATTGGAGGTTTTATCAAAGTAAgACAATATGATCAGRTAAcTATAGAAATTTGTGGAAARAGGGCTATAGGTACAGTGTTAGTAGGACCTACACCTRTCAACATAATTGGACGRAATATGTTGACTCAGMTTGGTTGTACTTTAAATTTCCCAATTAGTCCTATTGACACTGTACCAGTAACATTAAAGCCAGGAATGGATGGACCAAAGGTTAAACAGTGGCCATTGACAGAAGAAAAAATAAAAGCATTA…
032603_2019_AE	CCTCAAATCACTCTTTGGCAACGACCCCTTGTCACAGTAAAAGTAGGAGGACAGTTRAGAGAAGCTCTATTAGATACAGGAGCAGATGATACAGTATTAGAAGATATAAATTTGCCAGGAAAATGGAAACCAAAAATGATAGGGGGAATTGGAGGTTTTATCAAAGTAAGGCAATATGATCAGATACTTATAGAAATTTGTGGAAAAAGGGCTATAGGTACAGTATTAGTAGGACCTACACCTGTCAACATAATTGGACGAAATATGTTGACTCAACTCGGTTGTACTTTAAATTTTCCAATTAGTCCTATTGACACTGTACCAGTAAAATTAAAGCCAGGAATGGATGGACCAAAGGTTAAACAGTGGCCATTAACAGAAGAAAAAATAAAAGCATTA…
619045_2019_AE	CCTCAAATCACTCTTTGGCAACGACCCCTTGTCACAATAAAAATAGAAGGACAACTAAAAGAAGCTCTAYTAGATACAGGAGCAGATGATACAGTATTAGAAGATATAAATTTGCCAGGAAAATGGAAACCAAAAATGATAGGGGGAATTGGAGGTTTTATCAAAGTAAGGCAATATGATCAGATACTTATAGAAATTTGTGGAAAAAAGGCTATAGGTACAGTGTTAGTAGGACYTACACCTGTCAACATAATTGGACGAAATATGTTGACTCAGCTTGGGTGTACTTTAAATTTTCCAATTAGTCCTATTGARACTGTACCAGTAACATTAAAGCCAGGAATGGATGGACCAAAGRTTAAACAGTGGCCATTGACAGAGGAAAAAATAAAAGCATTA…
304329_2019_AE	~~~~~~~~~~~~~~~TGGCAACGACCCCTYGTCACAGTAAAAATAGRGGGACAGCTGAAAGAAGCTCTATTAGATACAGGAGCAGATGATACAGTATTAGAAGATATAAATTTGCCAGGAAAATGGAAACCAAAAATGATAGGGGGAATTGGAGGTTTTATCAAAGTAAGGCAATATGATCAGGTACCTATAGAAATTTGTGGAAAAAGGGCTATAGGTACAGTGTTAGTAGGACCTACACCTGTCAACATAATTGGACGAAATATGTTGACTCAGATTGGTTGTACTTTAAATTTTCCAATTAGTCCTATTGACACTGTACCAGTAACATTAAAGCCAGGAATGGATGGGCCAAAAGTTAAACAGTGGCCATTGACAGARGAAAAAATAARAGCATTA…
040901_2019_AE	CCTCAAATCACTCTTTGGCAACGACCCGTTGTCACAGTAAGAATAGARGGGCAGCTGAAAGAAGCTCTATTAGATACAGGGGCAGATGATACAGTATTAGAAGATATAAATCTGCCAGGAAAATGGAAACCAAAAATGATAGGGGGAATTGGAGGTTTTATCAAAGTAAGGCAATATGATCAGATACTTATAGAAATTTGTGGAAAACAGGTTAGAGGTACAGTGTTAGTAGGACCTACACCYGTCAACATAATTGGACGAAATATGTTGACTCAACTTGGTTGTACTTTAAATTTTCCAATTAGTCCTGTTGACACTGTACCAGTAACATTAAAGCCAGGAATGGATGGACCAAAGGTCAAACAGTGGCCATTGACAGAAGAAAAAATAAAAGCACTA…
304343_2019_AE	~~~~~~~~~~~~~~~TGGCARCGACCCCTYGTCACAATAAAAATAGGGGGRCAGCTAARAGAGGCTCTATTAGATACAGGAGCAGATGATACAGTATTTGAAGARATAAATTTGACAGGAAAATGGAAACCAAAAATGATAGGGGGAATTGGAGGTTTTATTAAAGTAAGGCAATATGATCAGRTACCTATAGAAATTTGTGGAAAAAGGGCTATAGGTACAGTRTTAGTAGGACCTACACCTATCAACATAATTGGAAGGAATATGTTGACTCAGCTTGGTTGTACTTTAAATTTCCCAATTAGTCCTATTGAAACTGTACCAGTAAAATTAAAGCCAGGAATGGATGGACCAAAGGTTAAACAGTGGCCATTRACAGAAGAAAAAATAAAAGCATTA…
304366_2019_AE	~~~~~~~~~~~~~~~TGGCAACGACCCCTTGTCACMATAAAARTAGGAGGACARTTAAGAGAAGCTCTATTAGATACAGGAGCAGATGATACAGTATTAGAAGATATRAATTTGCCAGGRAAATGGAAACCAAAAATGATAGGGGGAATTGGAGGTTTTATCAAAGTAAARCARTATGATCAGATAMCYATAGAAATTTGTGGAMAWAAGGCYATAGGTACAGTRTTARTAGGACCTACACCTGTCAACATAATTGGAMGRAATMTGTTGACTCAGMTTGGTTGTACTTTAAATTTYCCAATTAGTCCTATTGACACTGTACCAGTAACAYTAAAGCCAGGAATGGATGGACCAAAGGTTAAACAGTGGCCATTGACAGAAGAAAAAATAAAAGCATTA…
041621_2019_AE	CCTCAAATCACTCTTTGGCAACGACCCYTYGTCACAATAAAGATAGAAGGRCAGCTAAAAGAAGCTCTATTAGAYACAGGAGCAGATGATACAGTAYTAGAAGATATAAATTTGCCAGGAAAATGGAAACCAAAAATGATAGGGGGAATTGGAGGTTTTATCAAAGTAAgGCAATATGATGAGATAhYKATAGAAATTTGTGGAAAAAAGGCTATAGGTACAGTGTTAGTRGGACCYACMCCTGTCAACATAATTGGACGAAATATGTTGACTCAGCTTGGTTGTACTTTAAATTTTCCAATCAGTCCTATTGATACTGTACCAGTAAAATTAAAGCCAGGAATGGATGGCCCAAAGGTTAAACAATGGCCATTGACAAAAGAGAAAATAGAAGCATTA…
304370_2019_AE	~~~~~~~~~~~~~~~TGGCAACGACCCTTCGTCACAATAAAAATAGGAGGACAGTTGAAAGAAGCTCTATTAGATACAGGAGCAGATGATACAGTGTTAGAAGATATAAATTTACCAGGAAAATGGAAGCCGAAAATGATAGGGGGAATTGGTGGTTTTATCAAAGTTAGGCAATATGATCAGATACTTATAGAAATTTGTGGAACAAAGGCTATAGGTACAGTGTTAGTAGGACCTACACCTGTCAACATAATTGGACGAAATATGTTGACTCAGCTTGGCTGTACTTTAAATTTTCCAATTAGTCCTATTGACACTGTACCAGTAACATTAAAGCCAGGAATGGATGGACCAAAGGTTAAACAGTGGCCATTGACAGAAGAAAAAATAAAAGCATTA…
329420_2019_AE	~~~~~~~~~~~~~~~TGGCAACGACCCCTTGTCACAATAAAAATAGGGGGACAGCTAAGAGAGGCTCTATTAGATACAGGAGCAGATGATACAGTATTTGAAGAGATAAATTTGATRGGAAAATGGAAACCAAAAATGATAGGGGGAATTGGAGGTTTTATTAAAGTAAGGCAATATGATCAGRTACCTATAGAAATTTGTGGAAAAARGGCTATAGGTACAGTGTTAGTAGGACCTACACCTATCAACATAATTGGAAGGAATATGTTGACTCAGCTTGGTTGTACTTTAAATTTCCCAATTAGTCCTATTGAAACTGTACCAGTAAAATTAAAGCCAGGAATGGATGGACCAAAGGTTAAACAGTGGCCATTGACAGAAGAAAAAATAAAAGCATTA…
323726_2019_AE	~~~~~~~~~~~~~~~TGGCAACGACCCCTTGTCACAATAAAAATAGGGGGACAGCTAAGAGAAGCTCTATTAGATACAGGAGCAGATGATACAGTATTAGAAGATATAGATTTGCCAGGAARATGGAAACCAAAAATGATAGGGGGAATTGGAGGTTTTATCAAAGTAAGGCAATATGATCAGATACYTATAGAAATTTGTGGAAAAAAGGCTATAGGTACAGTGTTAGTAGGACCTACACCTGTCAACATAATTGGACGAAATATGTTGACTCAGCTTGGTTGTACTTTAAATTTCCCAATTAGTCCTATTGACACTGTACCAGTAACATTAAARCCAGGAATGGATGGACCAAAGGTTAAACAGTGGCCATTGACAGAAGAAAAAATAAAAGCATTA…
619070_2019_AE	CCTCAAATCACTCTTTGGCAACGACCCCTTGTCACAATAAAAATAGGAGGACAGGTGAAAGAAGCTCTATTAGATACAGGAGCAGATGATACAGTGTTAGAAGATATAAATTTACCAGGAAAATGGAAACCAAAAATGATAGGGGGRATCGGAGGTTTTATCAAAGTAAGACAATATGATCAGATAACTATAGAAATTTGTGGAAAAAAGGCTATAGGTACAGTGTTRGTAGGACCTACACCTGTCAACATAATTGGACGAAATATGTTGACTCAGCTTGGTTGTACTTTAAATTTTCCAATTAGTCCTATTAACACTGTACCAGTAACATTAAAGCCAGGAATGGATGGACCAAAGGTTAAACARTGGCCATTGACAGAAGAAAAAATAAAAGCATTA…
304373_2019_AE	~~~~~~~~~~~~~~~TGGCAACGACCCCTTGTCGCAGTAAGAGTAGGAGGACAGCTGAAAGAAGCTCTATTAGATACAGGAGCAGATGATACAGTATTAGAAGATATAAATTTGCCAGGGAAATGGAAACCAAAAATGATAGGGGGAATTGGAGGTTTTATCAAGGTAAGGCAATATGATCAGATACTTATAGAAATTTGTGGAAAAAAGGCTATAGGCACAGTGTTGGTAGGACCTACACCTGTCAACATAATTGGACGAAATATGTTGACTCAGATTGGTTGTACTTTAAATTTCCCAATTAGTCCTATTGACACTGTACCAGTAACATTAAAGCCAGGAATGGATGGCCCAAAGGTTAAACAGTGGCCACTGACAGAAGAAAAAATAAAAGCATTA…
619075_2019_AE	CCTCAAATCACTCTTTGGCAACGACCCGTTGTCACAGTAAAAATAGGRGGACATCTGAGAGAGGCTCTATTAGATACAGGAGCAGATGATACAGTATTAGAAGATATAGATTTGCCAGGAAAATGGAAACCAAAAATGATAGGGGGAATTGGAGGTTTTATCAAAGTRAGGCAATATGATCAGATACTTATAGAWATTTRTGGAAAAAAGGCTATAGGTACAGTGTTAGTAGGACCTACACCTGTCAACATAATTGGACGAAATATGTTGACTCAGATTGGTTGTACTTTAAATTTTCCAATTAGTCCTATTGACACTGTACCAGTAAAATTRAAGCCAGGAATGGATGGACCAAGGGTTAAACARTGGCCATTGACAGAAGAAAAAATAAAAGCATTA…
329326_2019_AE	~~~~~~~~~~~~~~~TGGCAACGACCCCTTGTCGCAGTAAGAGTAGGAGGACAGCTGAAAGAAGCTCTATTAGATACAGGAGCAGATGATACAGTATTAGAAGATATAAATTTGCCAGGGAAATGGAAACCAAAAATGATAGGGGGAATTGGAGGTTTTATCAAGGTAAGGCAATATGATCAGATACTTATAGAAATTTGTGGAAAAAAGGCTATAGGCACAGTGTTGGTAGGACCTACACCTGTCAACATAATTGGACGAAATATGTTGACTCAGATTGGTTGTACTTTAAATTTCCCAATTAGTCCTATTGACACTGTACCAGTAACATTAAAGCCAGGAATGGATGGCCCAAAGGTTAAACAGTGGCCACTGACAGAAGAAAAAATAAAAGCATTA…
304411_2019_AE	CCTCAAATCACTCTTTGGCAACGACCCCTTGTCACAATAAAAATAGGAGGACAGCTAAARGAAGCTCTATTAGATACAGGGGCAGATGATACAGTATTAGAARATATAAATTTGCCAGGAAAATGGAAACCAAAAATGATAGGGGGAATTGGAGGTTTTATCAAGGTAAGACAATATGATCAGATACTTATAGAAATTTGTGGAAAAAAGGCTATAGGTACAGTATTAGTAGGACCTACCCCTGTCAACATAATTGGACGAAAYATGTTGACTCAGATTGGATGTACTTTAAATTTCCCAATTAGYCCTATTGACACTGTRCCAGTAAAATTAAAGCCAGGAATGGATGGACCAAAGATTAAACAGTGGCCATTGACAGAAGAAAAAATAAAAGCATTA…
304414_2019_AE	CCTCAAATCACTCTTTGGCAACGACCTGTTGTCACAGTAAGGATAGAAGGACAGCTGAGAGAAGCTCTATTAGATACAGGGGCAGATGATACAGTATTAGAAGATATAAATTTGCCAGGAAAATGGAAGCCAAAAATGATAGGGGGAATTGGGGGCTTTATCAAGGTCAGGCAATATGATCAGATACTTATAGAAATTTATGGAAAAAAGGCTATAGGTACAGTGTTAGTCGGGCCTACACCTGTCAACATAATTGGACGAAATATGTTGACTCAGATTGGTTGTACTTTAAATTTYCCAATTAGTCCTATTGACACTGTACCAGTAAAATTAAAGCCAGGAATGGATGGGCCAAAGGTTAAACAGTGGCCATTGACAGAAGAAAAAATAAAAGCACTA…
304417_2019_AE	CCTCAAATCACTCTTTGGCAACGACCCCTTGTCACAGTAAAAGTAGGGGGACAGCTGAAAGAAGCTCTATTAGATACAGGAGCAGATGATACAGTATTAGAAGATATAGATTTTCCAGGAAAATGGAAACCAAAAATGATAGGGGGAATTGGAGGTTTTATCAAAGTAAGACAATATGATCAGATACTTATAGAAATTTGTGGAAAAAGGGCTATAGGTACAGTGTTAGTAGGACCTACACCCGTCAACATAATTGGACGAAATATGTTGACTCAGCTTGGTTGTACTTTAAATTTCCCAATTAGTCCTATTGACACTGTGCCAGTAAAATTAAAGCCAGGAATGGATGGACCAAAGGTTAAACAATGGCCATTGACAGAAGAAAAAATAGAAGCATTA…
zhangbaoqiang_2019_AE	cctcaaatcactctttggcarcgaccmgtagtcacagtaagaatagaaggacagctgaaagaagctctattagatacaggagcagatgatacagtattagaagatataaatttgccaggaaaatggaaaccaaaaatgatagggggaattggaggttttattaaagtaagacaatatgatcagatactcatagaaatttgtggaaaaaaggctataggtacagtattagtaggacctacacctgtcaacataattggacgraatatgttractcagattggttgtactttaaatttcccaattagtcctattraaactgtaccagtaacattaaagccaggaatggatggaccaaaggttaaacaatggccattgacagaagaaaaaataaaagcattr…
052812_2019_AE	CCTCAAATCACTCTTTGGCAGCGACCCCTAGTCRCAATAAAAATAGGAGGACAGTTGAAAGAAGCTCTATTAGATACAGGAGCAGATGATACAGTATTAGAAGATATAAATTTGCCAGGAAAATGGAAACCAAAAATGATAGGGGGAATTGGAGGGTTTATCAAAGTAAGACAATATGATCAGATACTTATAGAAATTTGTGGAAARAARGCTATAGGTACAGTGTTAGTAGGACCTACACCTGTCAACATAATTGGACGAAATATGTTGACTCAGATTGGTTGTACYTTAAATTTYCCAATTAGTCCTATTGAYACTGTACCAGTAAAATTAAAGCCAGGAATGGATGGACCAAAGGTTAAACAGTGGCCATTGACAGAAGAAAARATAAAAGCATTA…
619083_2019_AE	CCTCAAATCACTCTTTGGCAACGACCCCTTGTCGCAGTAAAAATAGGAGGACAGGTGAAAGAAGCTCTATTAGATACAGGAGCAGATGATACAGTGTTAGAAGATATAAATTTACCAGGAAAATGGAAACCAAAAATGATAGGGGGAATTGGAGGTTTTATCAAAGTAAGGCAATATGATCAGATACTTATAGAAATTTGTGGAAAAAARGCTATAGGTACAGTGTTGGTAGGACCYACACCTGTCAACATAATTGGACGAAATATGTTGACTCAGATTGGTTGYACTTTAAATTTTCCAATYAGTCCTATTRACACTGTACCAGTAACATTAAAGCCAGGAATGGATGGACCAAAGGTTAAACAGTGGCCAYTAACAGAAGAAAAAATAAAAGCATTA…
060403_2019_AE	CCTCAAATCACTCTTTGGCAACGACCCCTTGTCACAATAAAAATAGGAGGACAGCTAAGAGAAGCTCTATTAGACACAGGAGCAGATGATACAGTATTAGAAGATATAAATTTGCCAGGAAAATGGAAACCAAAAATGATAGGGGGAATTGGAGGTTTTATCAAGGTAAGRCAATATGATCARATACCTATAGAAATTTGTGGAAAAAAGGCTATAGGTACAGTGTTAGTAGGACCYACACCTGTCAACATAATTGGRCGAAATCTGTTGACTCAGCTTGGTTGTACTTTAAATTTCCCAATTAGTCCTATTGACACTGTACCAGTAACATTAAAGCCAGGAATGGATGGACCAAAGGTTAAACAGTGGCCATTGACAGAAGAAAAAATAAAAGCATTA…
304449_2019_AE	~~~~~~~~~~~~~~~TGGCAACGACCCCTTGTCACAATAAAAATAGGAGGACAGCTAAGAGAAGCTCTATTAGACACAGGAGCAGATGATACAGTATTAGAAGATATAAATTTGCCAGGAAAATGGAAACCAAAAATGATAGGGGGAATTGGAGGTTTTATCAAGGTAAGACAATATGATCAGATACCTATAGRAATTTGTGGAAAAAAGGCTATAGGTACAGTGTTARTAGGACCTACACCTGTCAACATAATTGGACGAAATCTGTTGACTCAGCTTGGTTGTACTTTAAATTTCCCAATTAGTCCTATTGACACTGTACCAGTAACATTAAAGCCAGGAATGGATGGACCAAAGGTTAAACARTGGCCATTGACAGAAGAAAAAATAAAAGCATTA…
304442_2019_AE	~~~~~~~~~~~~~~~TGGCAACGACCCMTTGTCACAATAARAATAGAAGGACAGCTGAGAGAWGCTCTATTAGATACAGGAGCAGATGATACAGTATTAGAAGATATAAATTTGCCAGGAAAATGGAARCCAARAATGATAGGGGGAATTGGAGGTTTTATCAAAGTAAGGCAATATGATCAGATACYTATAGAAATTTGTGGAAAAAGGGCTAYAGGCACAGTGTTAGTAGGACCTACACCTGTCAACATAATTGGACGAAATATGTTGACTCAGCTTGGKTGTACTTTAAATTTCCCAATTAGTCCTATTGACACTGTACCAGTAAAATTAAAGCCAGGAATGGATGGACCAAAGGTTAAACAGTGGCCATTAACAGAAGARAAAATAAAAGCACTA…
304467_2019_AE	~~~~~~~~~~~~~~~TGGCAACGACCCATTGTCACAGTAAAAATAGGAGGACAGCTGAGGGAAGCTCTATTAGATACAGGAGCAGATGATACAGTATTAGAAGATATAAATTTGCCAGGAAAATGGAAACCAAAATTGATAGGGGGAATTGGAGGTTTTATCAAAGTAAAGCAATATGATCAGATACTTATAGAAATTTTTGGAAAGAAGGCTATAGGTACAGTATTAGTAGGACCTACACCTGTCAACATAATTGGACGAAATATGTTGACRCAGATTGGTTGTACTTTAAATCTYCCAATAAGTCCTATTGACACTGTACCAGTAACATTAAAGCCAGGAATGGATGGACCAAAGGTTAAACAGTGGCCATTGACAGAAGAAAAAATAAAAGCATTA…
070913_2019_AE	CCTCAAATCACTCTTTGGCAACGACCCCTTGTCACAATAAAAATAGAAGGACAGCTAAGAGAAGCTCTATTAGATACAGGAGCAGATGATACAGTATTAGAAGATATAAATTTGCCAGGAAAATGGAAACCAAAAATGATAGGGGGAATTGGAGGTTTTATCAAAGTAAGGCAATATGATCAGATACTTATAGAAATTTGTGGAAAAAGGGCTATAGGTACAGTATTAGTAGGACCTACACCTGTCAACATAATTGGACGAAACATGTTGACTCAGCTCGGTTGTACTTTAAATTTCCCAATTAGTCCTATTGACACTGTACCAGTAAAATTAAAGCCAGGAATGGATGGACCAAAGGTTAAACAGTGGCCATTGACAGAAGAAAAAATAAGAGCATTA…
323855_2019_AE	CCTCAAATCACTCTTTGGCAACGACCCCTCGTCACAATAAGAGTAGAAGGACAGCTGAAAGAAGCTCTATTAGATACAGGAGCAGATGATACAGTGTTAGAAGAGATAAATTTACCAGGGAAATGGAAACCAAAAATGATAGGGGGAATTGGAGGTTTTATCAAGGTAAGGCAATATGAACAAATACTTATAGAAATTTGTGGAAAAAAGGCTATAGGTACAGTGTTGGTAGGACCTACACCTGTCAACATAATTGGACGAAATATGTTGACTCAGCTTGGTTGTACTTTAAATTTTCCAATTAGTCCCATTGACACTGTACCAGTAACACTAAAGCCAGGAATGGATGGGCCAAAGGTTAAACAGTGGCCATTGACAGAAGAAAAAATAAAAGCATTA…
304487_2019_AE	~~~~~~~~~~~~~~~TGGCAGCGACCCCTTGTCACAATAAAAATAGGAGGACAGCTAAGAGAAGCTCTATTAGATACAGGAGCAGATGATACAGTATTAGAAAATATAAATTTGCCAGGAAAATGGAAGCCAAAAATGATAGGGGGAATTGGAGGTTTTATCAAAGTAAGGCAATATGATCAGATTACTATAGAAATTTGTGGAAAAAAGGCTATAGGTACAGTRTTAGTAGGACCTACACCTGTCAACATAATTGGACGAAATATGTTGACTCAGCTTGGTTGTACTTTAAATTTCCCAATTAGTCCTATTGACACTGTACCAGTAACATTAAAGCCAGGAATGGATGGGCCAAAGGTTAAACAGTGGCCATTGACAGAAGAAAAAATAAAAGCATTA…
304506_2019_AE	cctcaaatcactctttggcaacgaccccttgtcacaataaaaatagaaggrcarctgagagaagctctactagatacaggagcagatgatacagtattagaagatataaatttgmcaggaaaatggaaaccaaaaatgatagggggaattggaggttttatcaaagtaaggcaatatgatcagatacttatagaaatttgtggaaaaagggctataggtacagtgttggtaggacctacacctgtcaacataattggrcgaaatatgttgactcagattggttgtactttaaatttcccaattagtcctattgacactgtaccagtaacattaaagccaggaatggatggaccaaaggttaaacagtggccattgacagaagaaaaaataaaagcatta…
073012_2019_AE	CCTCAAATCACTCTTTGGCAACGACCCMTTGTCACAGTAAAAATAGAAGGACARCAGAGAGAAGCTCTATTAGATACAGGAGCAGATGATACAGTATTAGAAGATATAAATTTGCCAGGAAAATGGAAACCAAAATTGATAGGGGGAATTGGAGGTTTTATCAAAGTAAGGCAATATGATCAGATACTTATAGAAATTTGTGGAAAAAAGGCTATAGGTACAGTGTTAGTAGGACCTACACCTGTCAACATAATTGGACGAAATATGTTGACACAGRTTGGTTGTACTTTAAATTTTCCAATAAGTCCTATTGACACTGTACCAGTAACATTAAAGCCAGGAATGGATGGACCAAAGGTTAAACAGTGGCCATTGACAGAAGAAAAAATAAAAGCATTA…
304517_2019_AE	CCTCAAATCACTCTTTGGCAACGACCCCTTGTCACAATAAGAATAGGGGGACAGCTAAGGGAAGCCCTATTAGATACAGGAGCAGATGATACAGTATTAGAAGATATAAATTTGCCAGGAAAATGGAAACCAAAAATGATAGGGGGAATTGGAGGTTTTATCAAGGTAAGGCAATATGATCAGATACTTATAGAAATTTGTGGAAAAAGGGCTATAGGTACAGTGTTGGTAGGACCTACACCTGTCAACATAATTGGACGAAATATGTTGACTCAGCTTGGTTGTACTTTAAATTTCCCAATTAGTCCTATTGACACTGTACCAGTAACATTAAAACCAGGAATGGATGGGCCAAAGGTTAAACAGTGGCCATTGACAGAAGAAAAAATAAAAGCATTA…
323887_2019_AE	CCTCAAATCACTCTTTGGCAACGACCCCTYGTCACAATAAGAGTAGAAGGACAGCTGAAAGAAGCTYTWTTAGATACAGGAGCAGATGATACAGTGTTAGAAGAGATAAATTTACCAGGGAAATGGAAACCAAAAATGATAGGGGGAATTGGAGGTTTTATCAAGGTAAGGCAATATGATCAAATACTTATAGAAATTTGTGGAAAAAAGGCTATAGGTACAGTGTTAGTAGGACCTACACCTGTCAACATAATTGGACGAAATATGTTGACTCAGCTTGGTTGTACTTTAAATTTTYCAATTAGTCCTATTGACACTGTACCAGTAACMTTAAAGCCAGGAATGGATGGGCCAAAGGTTAAACAGTGGCCATTGACAGAAGAAAAAATAAAAGCATTA…
304520_2019_AE	CCTCAAATCACTCTTTGGCAACGACCCCTTGTCACAATAAAAATAGAAGGGCAACTGAGAGAAGCTCTACTAGATACAGGAGCAGATGATACAGTATTAGAAGACATAAATTTGCCAGGAAAATGGAAACCAAAAATGATAGGGGGAATTGGAGGTTTTATCAAAGTAAGACAATATGATCAGATACTTATAGAAATTTGTGGAAAAAGGGCTATAGGTACAGTGTTGGTAGGACCTACACCTGTCAACATAATTGGGCGAAATATGTTGACTCAGATTGGTTGTACTTTAAATTTCCCAATTAGTCCTATTGACACTGTACCAGTAACATTAAAGCCAGGAATGGATGGGCCAAAGGTTAAACAGTGGCCATTGACAGAAGAAAAAATAAAAGCATTA…
304523_2019_AE	CCTCAAATCACTCTTTGGCAGCGACCACTAGTCATAATAAAAGTAGAAGGACAGCTGAAAGAAGCTCTATTAGATACAGGAGCAGACGATACAGTATTAGAAGATATAAGTTTGCCAGGAAAATGGAAACCAAAAATGATAGGGGGAATTGGAGGTTTTATCAAAGTAAGACAATATGATCAGATACTTATAGAAATTTGTGGAAAAAAGGCTATAGGTACAGTATTAGTAGGACCTACACCTGTCAACATAATTGGACGAAATATGTTGACTCAGCTTGGTTGTACTTTAAATTTCCCAATTAGTCCTATTGACACTGTACCAGTAAAATTAAAGCCAGGAATGGATGGACCAAAGRTTAAACAGTGGCCAYTGACAGAAGAAAAAATAAAAGCATTA…
304519_2019_AE	CCTCAAATCACTCTTTGGCARCGACCCGTTGTCACAGTRAGAATAGARGGACAGCTGAAAGAAGCYCTATTAGATACAGGRGCAGATGATACAGTATTAGAAGATATAAATTTGCCAGGAAAATGGARACCAAAAATGATAGGGGGAATTGGAGGTTTTATCAAAGTAARGCAATATGATCAGRTACATATAGAAATTTGTGGAAAACAGGCTATAGGTACAGTGTTAGTAGGACCTACACCTGTCAACATAATTGGACGAAATATGTTGACTCAGATTGGTTGTACTTTAAATTTTCCAATTAGTCCTGTTGACACTGTACCAGTAAMATTAAAGCCAGGAATGGATGGACCAAAGGTCAAACAGTGGCCATTGACAGAAGAAAAAATAAAAGCACTA…
304513_2019_AE	CCTCAAATCACTCTTTGGCAACGACCCCTTGTCACAGTAARAATRGGAGGACAGCTGAAGGAAGCTCTATTAGATACAGGAGCAGATGATACAGTATTAGAAGACATAAATTTGCCAGGAAAATGGAAACCAAAAATGATAGGGGGAATTGGAGGTTTTATCAAAGTAAGGCAATATGATCAGATACAGATAGAAATTTGTGGRAAAAAGGCTATAGGTACAGTATTAGTAGGGCCTACACCTGTCAACATAATTGGACGAAATATGTTGACTCAGATTGGYTGTACTTTAAATTTTCCKATTAGTCCTATTGACACTGTACCAGTAACATTAAARCCAGGAATGGATGGACCAAAGGTTAAACAGTGGCCATTGACAGAAGAAAAAATAAAAGCMTTA…
081309_2019_AE	CCTCAAATCACTCTTTGGCAACGACCCCTTGTCCCAATAAAAATAGGAGGACAGATGAGAGAAGCTCTATTAGATACAGGAGCAGATGATACAGTATTAGAAGATATAAATTTACCAGGAAAATGGAAACCAAAAATGATAGGGGGAATTGGAGGTTTTATCAARGTAAGGCAATATGATCAGATACCTATAGAAATTTGTGGAAAAARGGCTATAGGTACAGTGTTAGTAGGACCTACACCTGTCAACATAATTGGACGAAATATGTTGACTCAGCTTGGTTGTACTTTAAATTTCCCAATTAGTCCTATTGACACTGTACCAGTAACATTAAAGCCAGGAATGGATGGACCAAAGGTTAAACAGTGGCCATTGACAGAAGAAAAAATAAAAGCATTA…
081306_2019_AE	CCTCAAATCACTCTTTGGCAACGACCCCTTGTCACAATAAAAATAGGAGGACAGGTGAAAGAAGCTCTATTAGATACAGGAGCAGATGATACAGTGTTAGAAGATATAAATTTACCAGGAAAATGGAAACCAAAAATGATAGGGGGAATCGGAGGTTTTATCAAAGTAAGACAATATGATCAGATAACTATAGAAATTTGTGGAAAAAAGGCTATAGGTACAGTGTTGGTAGGACCTACACCTGTCAACATAATTGGACGAAATATGTTGACTCAGCTTGGTTGTACTTTAAATTTTCCAATTAGTCCTATTAACACTGTACCAGTAACATTAAAGCCAGGWATGGATGGACCAAAGGTTAAACAGTGGCCATTGACAGAAGAAAAAATAAAAGCATTA…
322194_2019_AE	CCTCAAATCACTCTTTGGCAACGACCCCTTGTCACAATAAAAATAGGAGGACAGCTAAGAGAAGCTCTATTAGATACAGGAGCAGATGATACAGTATTAGAAGATATAAATTTACCAGGAAAATGGAGACCAAAAATGATAGGGGGAATTGGAGGTTTTATCAAAGTAAGGCAATATGATCAGATACCTATAGAAATTTGTGGAAAAAGGGCTATAGGCACAGTGTTAGTAGGACCTACACCTGTCAACATAATTGGACGAAATATGTTGACTCAGCTTGGTTGCACTTTAAATTTCCCAATTAGTCCTATTGACACTGTACCAGTAACATTAAAGCCAGGAATGGATGGACCAAAGGTTAAACAATGGCCATTGACAGAAGAAAAAATAAAAGCATTA…
323867_2019_AE	CCTCAAATCACTCTTTGGCAACGACCCCTTGTCRCARTAAAAATAGGAGGACARTTGAGAGAAGCTCTRCTAGATACAGGAGCAGATGATACAGTATTAGAAGATATAAATYTGCCAGGAAAATGGAAACCAAAAATGATAGGGGGAATTGGAGGYTTTATTAAAGTAAGGCAATATGATCAGATACTTATAGAAATTTGTGGAAAAAAGGCTATAGGTACAGTGTTGGTAGGACCTACACCTATCAACATAATTGGACGRAATATGTTGACTCAGCTTGGTTGYACTTTAAATTTCCCAATTAGTCCTATTGACACTGTACCAGTAACATTAAAGCCAGGAATGGATGGACCAAAGGTTAAACAGTGGCCATTAACAGAAGARAAAATAAAAGCATTA…
619131_2019_AE	CCTCAAATCACTCTTTGGCAACGACCCCTTGTCACAGTAAAAATAGGAGGACAGCTGAGAGAAGCTCTATTAGATACAGGAGCAGATGATACAGTACTAGAAGATATAGATTTGCCAGGAAAATGGAAACCAAAAATGATAGGGGGAATTGGAGGTTTTATCAAAGTAAAGCAATATGATCAGATTCTTATAGAAATTTGTGGAAAAAGGGCTATAGGYACAGTGTTAGTAGGACCYACACCTGTCAACATAATTGGACGAAATATGTTGACTCAGATTGGCTGTACTTTAAATTTCCCAATTAGTCCTATTGACACTGTACCAGTAAAATTAAAGCCAGGAATGGATGGGCCAAAGGTTAAACAGTGGCCATTAACAGAAGAAAAAATAAAAGCATTA…
082716_2019_AE	CCTCAAATCACTCTTTGGCARCGACCCRTTGTCACAGTAAAAGTAGGGGGACAACTAAAAGAAGCTCTATTAGATACAGGAGCAGATGATACAGTATTAGAAGATATAAATTTGCCAGGAAAATGGAAACCAAAAATGATAGGGGGAATTGGAGGTTTTATCAARGTAAGGCAATATGATCAGATACTTATAGAAATTTGYGGAAAAAGGGCTATAGGTACAGTATTAGTAGGACCTACACCTGTCAACATAATTGGACGAAATATGTTGACTCAAATTGGTTGTACTTTAAATTTCCCCATTAGTCCTATTGACACTGTACCAGTAAAATTAAAGCCAGGAATGGATGGACCAAAGGTTAAACAGTGGCCATTGACAGAAGAAAAAATAAAAGCATTA…
304546_2019_AE	CCTCAAATCACTCTTTGGCAGCGACCCCTAGTCACAGTAAARATAGGAGGACAGCTGAAAGAAGCTCTATTAGATACAGGAGCAGATGATACAGTATTAGAAGATATAAATTTGCCAGGAAAATGGAAACCAAAAATGATAGGGGGAATTGGAGGTTTTATCAAAGTAARACAATATGATCAGATACYTATAGAAATTTGTGGAAAAAAGGCTATAGGTACAGTACTAGTAGGACCTACACCTRTCAACATAATTGGACGAAATATGTTGACTCAGATTGGTTGTACTTTAAATTTCCCAATTAGTCCTATTGACACTGTACCAGTAAAATTAAAGCCAGGAATGGATGGACCAAAGGTTAAACAGTGGCCATTGACAGAAGAAAAAATAAAAGCATTA…
619141_2019_AE	CCTCAAATCACTCTTTGGCAACGACCCCTTGTTACCATAAAAATAGAGGGACAGCTGAAAGAAGCTCTATTAGATACAGGAGCAGATGATACAGTATTAGAAGATATAAATTTGTCAGGAAAATGGAAACCAAAAATGATAGGGGGAATTGGAGGTTTTATCAAAGTAAGGCAATATGATCAGATACTTATAGAAATTTGTGGAAAAAGRGCTATAGGTACAGTGTTAGTAGGACCTACACCTGTCAACATAATTGGACGAAATATGTTGACTCAGATTGGTTGTACCTTAAACTTTCCAATTAGTCCTATTGACACTGTACCAGTAACATTAAAGCCAGGAATGGATGGGCCAAAGGTTAAACAGTGGCCATTGACAGAAGAAAAAATAAAAGCATTR…
619142_2019_AE	CCTCAAATCACTCTTTGGCAGCGACCCCTTGTCACAATAAAAATAGGGGGACAACTAAAAGAAGCTCTATTAGATACAGGAGCAGATGATACAGTGTTAGAAGATATAAATTTGCCAGGAAAATGGAAACCAAAAATAATAGGGGGAATTGGAGGTTTTATCAAGGTAAGGCAATATGATCAGATACTTATAGAAATTTGCGGAAAAAGGGCTATAGGTACAGTATTAGTAGGACCTACACCTGTCAACATAATTGGACGAAATATGTTGACTCAGATTGGTTGTACTTTAAATTTCCCCATTAGTCCTATTGACACTGTACCAGTAAAATTAAAGCCAGGAATGGATGGACCAAAGGTTAAACAGTGGCCATTGACAGAAGAMAAAATAAAAGCATTA…
619143_2019_AE	CCTCAAATCACTCTTTGGCAACGACCCCTTGTCWCAGTAAAAATAGGAGGACAGCTAARAGAAGCTCTATTAGATACAGGAGCAGATGATACAGTATTMGAAGATATAAATTTGCCAGGAAAATGGAAACCAAAAATGATAGGGGGAATTGGAGGTTTTATCAARGTAARGCAATATGATCAGRTASYTATAGAAATTTGTGGAAAAAAGGCTATAGGTACAGTGTTAGTAGGACCTACACCTGTCAACATAATTGGACGAAATATGTTGACTCAGGTTGGTTGTACTTTAAATTTCCCAATTAGTCCTATTGACACTGTACCAGTAAAATTAAARCCAGGAATGGATGGACCAAAGGTTAAACAGTGGCCATTGACAGAAGAAAAAATAAAAGCATTA…
619140_2019_AE	CCTCAAATCACTCTTTGGCAACGACCCCTTGTTACCATAAAAATAGAGGGACAGCTGAAAGAAGCTCTATTAGATACAGGAGCAGATGATACAGTATTAGAAGATATAAATTTGTCAGGAAAATGGAAACCAAAAATGATAGGGGGAATTGGAGGTTTTATCAAAGTAAGGCAATATGATCAGATACTTATAGAAATTTGTGGAAAAAGGGCTATAGGTACAGTGTTAGTAGGACCTACACCTGTCAACATAATTGGACGAAATATGTTGACTCAGATTGGTTGTACCTTAAACTTTCCAATTAGTCCTATTGACACTGTACCAGTAACATTAAAGCCAGGAATGGATGGGCCAAAGGTTAAACAGTGGCCATTGACAGAAGAAAAAATAAAAGCATTA…
090312_2019_AE	CCTCAAATCACTCTTTGGCAACGACCCCTTGTCACAATAAGAATAGGAGGRCAGCTGAGGGAAGCTCTATTAGATACAGGAGCAGATGATACAGTATTAGAAGATATAGATTTGCCAGGAAAATGGAAACCAAAAATGATAGGGGGAATTGGAGGTTTTATCAAAGTAAGGCAATATGATCAGATAYTCATAGAAATTTGTGGAAAAARGGCTATAGGTACAGTRTTGGTAGGACCYACACCTGTCAACATAATTGGACGAAATATGTTGACTCAGATTGGTTGTACTTTAAATTTCCCAATTAGTCCTATTGACACTGTACCAGTRACATTAAAGCCAGGAATGGATGGACCAAAGRTTARRCAGTGGCCATTGACAGAAGAAAAAATAAAAGCATTA…
090306_2019_AE	CCTCAAATCACTCTTTGGCAACGACCCGTAGTCACAGTAAGAATAGRAGGRCAGCTGAAAGAAGCYCTATTAGATACAGGRGCAGATGATACAGTATTAGAAGATATAAATCTGCCAGGAAAATGGAAACCAAAAATGATAGGGGGAATTGGAGGTTTTATCAAAGTAAGGCAATATGATCAGATACTTATAGAAATTTGTGGAAAACAGGTTAAAGGTACAGTGTTAGTAGGACCTACACCTGTCAACATAATTGGACGAAATATGTTGACTCAACTTGGTTGTACTTTAAATTTTCCAATTAGTCCTGTTGACACTGTACCAGTAACATTAAAGCCAGGAATGGATGGACCAAARGTCAAACAGTGGCCRTTGACAGAAGAAAAAATAAAAGCACTA…
710401_2019_AE	CCTCAAATCACTCTTTGGCAAMGACCCCTYGTCACAATAAGAGTAGAAGGACAGCTGAAAGAAGCTCTATTAGATACAGGAGCAGATGATACAGTGTTAGAAGAGRTAAATTTACCAGGAAAATGGAAACCAAAAATGATAGGGGGAATTGGAGGTTTTATCAAGGTAAGGCAATATGAACAAATACTTATAGAAATTTGTGGAAAAAAGGCTATAGGTACAGTGTTAGTAGGACCTACACCTGTCAACATAATTGGACGAAATATGTTGACTCAGCTTGGTTGTACTTTAAATTTTCCAATTAGTCCTATTGACACTGTACCAGTAACATTAAAGCCAGGAATGGATGGGCCAAAGGTTAAACAGTGGCCATTGACAGAAGAAAAAATAAAAGCATTA…
329340_2019_AE	CCTCAAATCACTCTTTGGCAACGACCCATRGTCRCAGTAAAAATAGAAGGACAGCTGAAAGAAGCTCTATTAGATACAGGGGCAGATGATACAGTATTAGAGGATATAAATTTGCCAGGAAAATGGAARCCAAAAATGATAGGGGGAATTGGAGGTTTTATCAAAGTAAKGCAATATGATCAGGTAGTTATAGAAATTTRTGGAAAAAGGGCTATAGGTACAGTGTTAGTAGGACCTACACCTGTCAACATAATTGGACGAAATATGTTGACTCAGATTGGTTGTACTTTAAATTTCCCAATTAGYCCTATTGACACTGTACCAGTAACATTAAAGCCAGGAATGGATGGACCAAAGGTTAAACAATGGCCATTAACAGAAGAAAAAATAAAAGCATTA…
619151_2019_AE	CCTCAAATCACTCTTTGGCAACGACCCCTTGTCACAATAAAAATAGAAGGACAGCTGAAGGAAGCTCTATTAGATACAGGAGCAGATGATACAGTATTAGAAGATATAAATTTGCCAGGAAAATGGAAACCAAAAATGATAGGAGGAATTGGAGGTTTTATCAAAGTAAGGCAATATGATCAAATACAGATAGAAATTTGTGGAAAAAAGGCTATAGGTACAGTGTTAGTRGGACCTACACCTGTCAACATAATTGGCCGAAATATGTTGACTCAGCTTGGTTGTACTTTAAATTTTCCAATTAGTCCTATTGACACCGTACCAGTAACATTAAAGCCAGGAATGGATGGACCAAAGGTTAAACAGTGGCCATTGACAGAAGAAAAAATAAAAGCATTA…
619149_2019_AE	CCTCAAATCACTCTTTGGCAACGACCCATTGTCACAGTAAAAATAGGAGGACAGTTGAGGGAAGCTCTATTAGATACAGGAGCAGATGATACAGTATTAGAAGATATAAATTTGCCAGGAAAATGGAAACCAAAATTGATAGGGGGAATTGGAGGTTTTATCAAAGTAAGGCAATATGATCAGATACTTATAGAAATTTATGGAAAGAAGGCTATAGGTACAGTGTTAGTAGGACCTACACCTGTCAACATAATTGGACGAAATATGTTGACACAGATTGGTTGTACTTTAAATCTCCCAATAAGTCCTATTGACACTGTACCAGTAACATTAAAGCCAGGAATGGATGGACCAAAGGTTAAACAGTGGCCATTGACAGAAGAAAAAATAAAAGCATTA…
323956_2019_AE	CCTCAAATCACTCTTTGGCAACGACCCCTTGTCACAGTAAAAATAGAAGGRCAACTGAGAGAAGCTCTATTAGATACAGGAGCAGATGATACAGTATTAGAAGATATAAATTTGCCAGGAAAATGGAAACCAAAAATGATAGGAGGAATTGGAGGTTTTATCAAAGTTAGGCAATATGATCAGATACTTATAGAAATTTGTGGAAAAAAGGCTATAGGTACAGTGTTAGTAGGACCTACACCTGTCAACATAATTGGACGAAATATGTTGACTCAGATTGGTTGTACTTTAAACTTYCCAATTAGTCCCATTGACACTGTACCAGTAACATTAAAACCAGGAATGGATGGACCAAAGGTTAAACAGTGGCCATTGACAGAAGAAAAAATAAAAGCATTA…
304573_2019_AE	CCTCAAATCACTCTTTGGCAACGACCCGTTGTCACAGTAAGAATAGAAGGACAGCTRAAAGAAGCTCTATTAGATACAGGGGCAGATGATACAGTATTAGAAGATATAGATTTGCCAGGRAAATGGAGACCAAAAATGATAGGGGGAATTGGAGGTTTTATCAAAGTAAGGCAATATGATCAGATACATATAGAAATTTGTGGAAAACAGGCTRTAGGTACAGTGTTAGTAGGACCTACACCTGTCAACATAATTGGACGAAATATGTTGACTAAGATTGGTTGTACTTTAAATTTTCCAATTAGTCCTGTTGACACTGTACCAGTAAAATTAAAGCCAGGAATGGATGGACCAAARGTCAAACAGTGGCCATTGACAGAAGAAAAAATAAAAGCAYTA…
619155_2019_AE	CCTCAAATCACTCTTTGGCAACGACCCCTTGTCACAATAAAAATAGGRGGGCAGCTAAGAGAAGCTCTATTAGATACAGGAGCAGATGATACAGTATTAGAAGATATAAATTTGCCAGGAAAATGGAAACCAAAAATGATAGGAGGAATTGGAGGTTTTATYAAGGTAAGGCAATATGATCAGATACCTATAGAAATTTGTGGAAAAAAGGCTATAGGTACAGTGTTGGTAGGACCTACACCTGTCAACATAATTGGGCGAAATATGTTGACTCAACTTGGWTGTACTTTAAATTTCCCAATTAGTCCTATTGACACTRTACCAGTARCATTAAAGCCAGGAATGGATGGACCAAAGGTTAAACAGTGGCCATTGACAGAAGAAAAAATAAAAGCATTA…
619157_2019_AE	CCTCAAATCACTCTTTGGCAACGACCCCTTGTYACAGTAAAAGTAGGAGGACAGKTGATAGAAGCTCTATTAGATACAGGAGCAGATGATACAGTATTAGAGGAKATAAATTTGCCAGGAAAATGGAAACCAAAAATGATAGGGGGAATTGGAGGTTTTATCAAGGTAAGACAATATGATCAGATACCTATGGAAATTTGTGGAAAAARGGCTATAGGTACAGTATTAGTAGGACCTACACCTGTCAACATAATTGGACGAAATATGTTGACTCAACTTGGTTGTACTTTAAATTTTCCAATTAGTCCTATTGACACTGTACCAGTAACATTAAAGCCAGGAATGGATGGACCAAAGGTTAAACAGTGGCCATTGACAGAAGAAAAAATAAAAGCATTA…
304596_2019_AE	CCTCAAATCACTCTTTGGCAACGACCCCTTGTCACAATAAAAATAGGAGGACAGCTAAGAGAAGCTCTATTAGACACAGGAGCAGATGATACAGTATTAGAAGATATAAATTTGCCAGGAAAATGGAAACCAAAAATGATAGGGGGAATTGGAGGTTTTATCAAGGTAAGGCAATATGATCAGATACCTATAGAAATTTGTGGAAAAAAGGCTATAGGTACAGTGCTAGTAGGACCTACACCTGTCAACATAATTGGACGAAATCTGTTGACTCAGCTTGGTTGTACTTTAAATTTCCCAATTAGTCCTATTGACACTGTACCAGTAACATTAAAGCCAGGAATGGATGGACCAAAGGTTAAACAGTGGCCATTGACAGAAGAAAAAATAAAAGCATTA…
619161_2019_AE	CCTCAAATCACTCTTTGGCAACGACCCGTTGTCACAGTAAGAATAGAGGGGCAGCTGAAAGAAGCTCTATTAGATACAGGGGCAGATGATACAGTATTAGAAGATATAAATCTGCCAGGAAAATGGAAACCAAAAATGATAGGGGGAATTGGAGGTTTTATCAAAGTAAGGCAATATGATCAGATACTTATAGAAATTTGTGGAAAACAGGTTAGAGGTACAGTATTAGTAGGACCTACACCTGTCAACATAATTGGACGAAATATGTTGACTCAACTTGGTTGTACTTTAAATTTTCCAATTAGTCCTGTTGACACTGTACCAGTAACATTAAAGCCAGGAATGGATGGACCAAAGGTCAAACAGTGGCCGTTGACAGAAGAAAAAATAAAAGCACTA…
323986_2019_AE	CCTCAAATCACTCTTTGGCAACGACCCGTTGTCACAGTAAAAATAGAAGGACAGCTGAAAGAAGCGCTATTAGACACAGGAGCAGATGATACAGTATTAGAAGATATAGATTTGCCAGGAAAATGGAAACCAAAAATGATAGGGGGAATTGGAGGTTTTATCAAAGTAAGACAATATGATCAGATACTTATAGAAATTTGTGGAAAAAGGGCYATAGGTACAGTGTTAGTAGGGCCTACACCYGTCAACATAATTGGACGAAATATGTTGACTCAGATTGGTTGTACTTTAAATTTTCCAATTAGTCCTATTGACACTGTACCAGTAAAATTAAAGCCAGGAATGGATGGACCAAAGGTTAAACAATGGCCATTAACAGAAGAAAAAATAAAAGCATTA…
619166_2019_AE	CCTCAAATCACTCTTTGGCAACGACCYCTTGTYRCAATAAGAATAGGAGGAGAGCTGAGAGAAGCTCTACTAGATACAGGAGCAGATGATACAGTATTAGAAGACATARATTTGCCAGGAAAATGGAAACCAAAAATGATAGGGGGAATTGGAGGCTTTATCAAAGTAAGRCAATATGATCAGATACTTATAGAAATTTGTGGAAAAAAGGCTATAGGTACAGTGTTGGTAGGACCTACACCTGTCAACATAATTGGACGAAATATGTTGACTCAGCTTGGTTGTACTTTAAATTTCCCAATTAGTCCTATTGACACTGTACCAGTAAAATTAAAGCCAGGAATGGATGGACCAAAGGTTAAACAGTGGCCATTGACAGAAGAAAAAATAAAAGCATTA…
304624_2019_AE	CCTCAAATCACTCTTTGGCAACGACCCCTTGTCACAATAAAAATAGGGGGACAGCTAAGAGAAGCTCTATTAGATACAGGAGCAGATGATACAGTATTAGAAGATATAAATTTGCCAGGAAAATGGAAACCAAAAATGATAGGGGGAATTGGAGGTTTTATCAARGTAAGGCAATATGATCAGATACCTATAGAAATTTGTGGGAAAAAGGCTATAGGTACAGTATTAGTAGGACCTACACCTGTCAACATAATTGGGCGAAATATGTTGACTCAGCTTGGTTGTACTTTAAATTTCCCAATTAGTCCTATTGATACTGTACCAGTAACATTAAAGCCAGGAATGGATGGCCCAAAGGTTAAACAGTGGCCATTGACAGAAGAAAAAATAAAAGCATTA…
304629_2019_AE	CCTCAAATCACTCTTTGGCAGCGACCCCTCGTCACAATAAAAATAGGAGGACAGCTGAAAGAAGCTCTATTAGATACAGGAGCAGATGATACAGTGTTAGAAGATATAAATTTRCCAGGAAAATGGAAACCAAAAATGATAGGGGGAATTGGAGGTTTTATCAAAGTAAGGCAATATGATCAGATACTTATAGAAATTTGTGGAAAAAAGGCTATAGGTACAGTGTTAGTAGGACCTACACCTGTCAACATAATTGGACGAAATATGTTGACTCAGATTGGTTGTACTTTAAATTTTCCAATYAGYCCTATTGACACTGTACCAGTAACATTAAAGCCAGGAATGGATGGACCAAARGTTAAACAGTGGCCATTGACAGAAGAAAAAATARARGCATTA…
304630_2019_AE	CCTCAAATCACTCTTTGGCAACGACCCATTGTCACAGTAAAAATAGGAGGACAGTTGAGGGAAGCTCTATTAGATACAGGAGCAGATGATACAGTATTAGAAGATATAAATTTGCCAGGAAAATGGAAACCAAAATTRATAGGGGGAATTGGAGGTTTTATCAAAGTAAGRCAATATGATCAGATACTTATAGAAATTTWTGGAAARAAGGCTATAGGTACAGTRTTAGTAGGACCTACACCTGTCAACATAATTGGACGAAATATGTTGACACAGATTGGTTGTACTTTAAATCTCCCAATAAGTCCTATTGACACTGTACCAGTAACATTAAAGCCAGGAATGGATGGACCAAAGGTTAAACAGTGGCCATTGACAGAAGAAAAAATAAAAGCATTA…
324005_2019_AE	CCTCAAATCACTCTTTGGCAGCGACCCCTTGTCACAATAAAAATAGGAGGACAGYTAAGAGAAGCTCTATTAGATACAGGAGCAGATGATACAGTATTGGAAGATATAAATTTRCCAGGAAAATGGAARCCAAAAATRATAGGGGGAATTGGRGGTTTTATTAAGGTAARGCAATATGATCAGATACTTATAGAAATTTGTGGAAAAARGGCTRTAGGTACAGTATTAGTAGGACCRACACCKGTCAACATAATTGGACGAAATATGTTGACTCARATTGGTTGTACTTTAAATTTCCCAATYAGTCCTATTGACACTGTACCAGTAACATTAAAGCCAGGAATGGATGGGCCAAAGGTTAAACAATGGCCATTGACAGAAGAAAAAATAAAAGCATTA…
304638_2019_AE	CCTCAAATCACTCTTTGGCAACGACCCSTTGTCACARTAARAATAGAGGGACAGTTGAGAGAAGCTCTACTAGATACAGGAGCAGATGATACAGTATTAGAAGATATAAATTTGCCAGGAAAATGGAAACCAAAAATGATAGGGGGAATTGGAGGTTTTATCAAAGTAAGGCAATATGATCAGRTATCTATGGAAATTTGTGGRAAAAAGGCTATAGGTACAGTGYTGGTAGGACCTACACCTGTCAACATAATTGGRCGAAATATGTTGACTCAGCTTGGTTGTACTTTAAATTTCCCAATTAGTCCTGTTGACACTGTACCAGTAAAATTAAAGCCAGGAATGGATGGACCAAAGGTTAARCAGTGGCCATTGACAGAAGAAAAAATAAARGCATTA…
304649_2019_AE	CCTCAAATCACTCTTTGGCAACGACCCCTTGTCWCAATAAAAATAGGAGGACAGTTGAAAGAAGCTCTATTAGATACAGGAGCAGATGATACAGTATTAGAAGATATAAATTTACCAGGGAAATGGAAACCAAAAATGATAGGGGGAATTGGAGGTTTTATCAAAGTAAGGCAATATGATCAGATACCTATAGAAATTTGTGGAAAAAGGGCTATAGGTACAGTGTTAGTAGGACCTACACCTGTCAACATAATTGGACGAAATATGTTGACTCAGCTTGGTTGTACTCTAAATTTCCCAATTAGTCCTATTGACACTGTACCAGTAAAATTAAAGCCAGGAATGGATGGCCCAAAGGTTAAACAGTGGCCATTGACAGAAGAAAAAATAAAAGCATTA…
619079_2019_AE	CCTCAAATCACTCTTTGGCAACGACCAATAGTCACAGTAAGAATAGAAGGACAGCTGAAAGAAGCTCTATTAGATACAGGAGCAGATGATACAGTATTAGAAGATATAAATTTGCCAGGAAAATGGAAACCAAAAATGATAGGGGGAATTGGAGGTTTTATTAAAGTAAGACAATATGATCAGATACTCATAGAAATTTGTGGAAAAAAGGCTATAGGTACAGTATTAGTAGGACCTACACCTGTCAACATAATTGGACGAAATATGTTGACTCAGATTGGTTGTACTTTAAATTTTCCAATTAGTCCTATTGAAACTGTACCAGTAACATTAAAGCCAGGAATGGATGGACCAAAGGTTAAACAATGGCCATTGACAGAAGAAAAAATAAAAGCATTA…
112610_2019_AE	CCTCAAATCACTCTTTGGCARCGACCCCTTGTTACAATAAAAATAGGAGGACAGCTGAGAGAGGCTCTATTAGATACAGGAGCAGATGATACAGTATTAGAAGATATAAATTTGCAAGGAAAATGGAAACCAAAAATGATAGGGGGAATTGGAGGTTTTATAAAAGTAAGGCAATATGATCAGATACAGATAGAAATCTGTGGAAAAAAGGCTATAGGTACAGTGTTAGTAGGACCTACACCTGTCAACATAATTGGACGAAATATGTTGACTCAGATTGGYTGTACTTTAAATTTTCCAATCAGTCCTATTGACACTGTACCAGTAAAATTAAAGCCAGGAATGGATGGGCCAAAGGTTAAACAGTGGCCATTGACAGAAGAAAAAATAAAAGCATTR…
619189_2019_AE	CCTCAAATCACTCTTTGGCAACGACCCCTTGTCACAATAARAATAGGAGGACAGCTGAGAGAAGCTCTATTAGATACAGGAGCAGATGATACAGTGTTAGAAGATATAAATTTACCAGGAAAATGGAAACCAAAAATGATAGGGGGAATTGGAGGTTTTATCAAAGTAAGGCAATATGAYCAGATACCTATAGAAATTTGTGGAAAAAGGGCTATAGGTACAGTGTTAGTAGGACCTACACCTGTCAACATAATTGGACGAAATATGTTGACTCAGCTTGGTTGTACTTTAAATTTTCCAATTAGTCCTATTGACACTGTACCAGTAACATTAAAGCCAGGAATGGATGGACCAAAGGTTAAACAGTGGCCATTGACAGAAGAAAAAATAAAAGCATTA…
121010_2019_AE	CCTCAAATCACTCTTTGGCAACGACCCMTTGTCACARTAAAAATAGGAGGACAGCTAAGAGAAGCTCTATTAGATACAGGAGCAGATGATACAGTATTAGAAGATATAAATTTACCAGGAAAATGGAAACCAAAAATGATAGGGGGAATTGGAGGTTTTATCAAGGTAARGCAATATGATCAGATACCTATAGAAATTTGTGGACAGAAGGCTATAGGTACAGTGTTAGTAGGACCTACACCTGTCAACATAATTGGACGAAATATGTTRACCCAGATTGGTTGTACTTTAAATTTCCCAATTAGTCCTATTGACACTGTACCAGTAACATTAAAGCCAGGAATGGATGGACCAAAGGTTAAACARTGGCCATTGACAGAAGAAAAAATAAAAGCATTA…
121713_2019_AE	CCTCAAATCACTCTTTGGCAACGACCCCTCGTCACAGTAAAAGTAGGAGGACAGCTGAAAGAAGCTCTATTAGATACAGGAGCAGATGATACAGTATTAGAAGATATAAATTTGCCAGGAAAATGGAAACCAAAAATGATAGGGGGAATTGGAGGTTTTATCAAGGTAAGGCAATATGATCAGATACCTATAGAAATTTTTGGGAAAAAGGCTATAGGTACAGTATTAGTAGGACCTACACCTGTCAACATAATTGGACGAAATATGTTGACTCAGMTTGGTTGTACTTTAAATTTCCCAATTAGYCCTATTGACACTGTACCAGTAACATTAAARCCAGGAATGGATGGACCAARGGTTAAACAGTGGCCATTGACAGAAGAAAAAATAAAAGCATTA…
121701_2019_AE	CCTCAAATCACTCTTTGGCAACGACCCMTTGTYACAATAAAAATAGGRGGGCAGCTAAGAGARGCTCTATTAGATACAGGAGCAGATGATACAGTRTTAGAAGATATAAATTTGCCAGGAAAATGGAAACCAAAAATGATAGGGGGAATTGGAGGTTTTATCAAAGTRAGGCARTATGATCAGRTAACTATGGAAATTTGTGGAAAAAAGGCTATAGGTACAGTGTTAGTAGGACCTACACCTGTCAACATAATTGGACGAAATATGTTGACTCAGCTTGGTTGTACTTTAAATTTCCCAATTAGTCCTATTGACACTGTACCAGTAACATTAAAGCCAGGAATGGATGGACCAAAGGTTAGACAGTGGCCATTGACAGAAGAAAAAATAAAAGCATTA…
304289_2019_AE	~~~~~~~~~~~~~~~TGGCARCGACCCCTTGTCACAATAAAAGTAGAAGGACAGTTGAGAGAAGCTCTACTAGACACAGGAGCAGATGATACAGTATTAGAAGATATAAATTTGCCAGGAAAATGGAAACCAAAAATGATAGGGGGAATTGGAGGTTTTATCAAAGTAAGRCAATATGATCAGATACTWATAGAAATTTGTGGAAAAARGGCYATAGGTACAGTGTTGGTAGGACCTACACCTGTCAACATAATTGGACGAAATATGTTGACTCAGCTTGGTTGTACTTTAAATTTCCCAATTAGTCCTATTGACACTGTACCAGTAAAATTAAARCCAGGAATGGATGGACCAAAGGTTAAACAGTGGCCATTGACAGAAGAAAAAATAAAAGCATTA…
302617_2016_AE	cctcaaatcactctttggcaacgaccccttgtcacagtaaaaataggaggacagatgaaagaagctctattagatacaggagcagatgatacagtattagaagacataaatttgccagggaaatggaaaccaaaaatgatagggggaattggaggttttatcaaagtaaggcaatatgatcagatacttatagaaatttgtgggaaaaaagctataggtacagtgttagtaggacctacacctgtcaacataattggamgaaatatgttgactcarrttggttgyactttaaatttyccaatyagycctattgamactgtaccagtaacaytaaagccaggaatggatggmccaaargttaaacartggccattgacaraagaaaaaataraagcatta…
060702_2016_AE	cctcaaatcactctttggcaacgaccccttgtcacaataagaatagaaggacagttgagagaagctctactagatacaggagyagatgatacagtattagaagatataaatttaccaggaaaatggaaaccaaaaatgatagggggaattggaggttttatcaaagtaaggcaatatgatcagatacttatagaaatttgcggaaaaaaggctataggtacagtgttggtaggacctacacctgtcaacataattggacgaaatatgttgactcagcttggttgtactttaaatttcccaattagtcctattgacactgtaccagtaacattaaagccaggaatggatggaccaaaggttaaacagtggccattgacagaagaaaaaataaaagcatta…
101811_2016_AE	~~~~~~~~~~~~~~~TGGCAACGACCCCTTGTCACAATAAAAATAGGRGGACAGCTAAGAGAAGCTCTATTAGATACAGGAGCAGATGATACAGTATTRGAAGATATAAATTTGCCAGGAAAATGGAAACCAAAAATGATAGGGGGAATTGGAGGTTTTATCAAGGTAAGGCAATATGATCAGATACCTATAGAAATTTGTGGRAAAAAGGCTATAGGTACAGTGTTAGTAGGACCTACACCTGTCAACATAATTGGACGAAATATGTTGACTCAGCTTGGTTGTACTTTAAATTTCCCAATTAGTCCTATTGACACTGTACCAGTAACATTAAARCCAGGAATGGATGGACCAAAGGTTAAACAGTGGCCATTGACAGAAGARAAAATAAAAGCATTA…
010301_2017_AE	~~~~~~~~~~~~~~~TGGCAACGACCCCTTGTCACAGTAAAAATAGGAGGACAGCTGAaAGAAGCTCTATTAGATACAGGAGCAGATGATACAGTATTAgAAGATATAAATTTGCCAGGAAAATGGAAACCAAAAATGATAGGGGGAATTGGAGGTTTTATCAAAGTGAGGCAATATGATCAGGTACTTATAGAAATTTGTGGAAAAAGGgCTATAGGTACAGTGTTAGTAGGACCTACACCTGTTAACATAATTGGACGAAATATGTTGACTCAGaTTGGTTGYACTTTAAATTTTCCAATTAGTCCTATTGACACTGTACCAGTAACATTAAAGCCAGGAATGGATGGACCAAARGTTAAACARTGGCCATTGACAGAAGAGAAAATAAgAGCATTA…
012303_2017_AE	~~~~~~~~~~~~~~~TGGCAACGACCCCTTGTCACAATAAAAATAGAAGGACAGCTRAAAGAAGCTCTATTAGATACAGGAGCAGATGATACAGTATTAGAAGATATAAATTTGCCAGGAAAATGGAAACCAAAAATGATAGGGGGAATTGGAGGTTTTATCAAAGTAAGGCAATATGATCAGATACTTATAGAAATTTGTGGAAAAAGGGCTATAGGTACAGTGTTAGTAGGACCTACACCTGTCAACATAATTGGACGAAATATGTTGACTCAGCTTGGTTGTACCTTAAATTTTCCAATTAGTCCTATTGATACTGTACCAGTAAYATTAAAGCCAGGAATGGATGGACCAAAGRTTAAACAGTGGCCATTGACAGAAGAAAAAATAAAAGCATTA…
012302_2017_AE	~~~~~~~~~~~~~~~TGGCAACGACCCGTTGTCGCAGTAAGAATAGAAGGGCAGCTgAAAGAAGCTCTATTAGATACAGGRGCAGATGATACAGTATTAGAAGATATAAATYTGCCAGGAAAATGGAAAcCAAAAATGATAGGGGGAATTGGAGGTTTTATCAAAGTAAGGCAATATGATCAGATACTTATAGAAATTTGTGGAAAACAGGCTAWAGGTACAGTGTTAGTAGGACCTACACCTGTCAACATAATTGGAMGAAATATATTGACTCAGATTGGTTGTACTTTAAATTTTCCAATTAGTCCTRTTGACACTGTACCAGTAACATTAAAGCCAGGAATGGATGGACCAAAGGTYAAACARTGGCCRTTGACAGAAGAAAAAATAAAAGCAYTA…
303574_2017_AE	CCTCAAATCACTCTTTGGCAACGACCCCTTGTCACAATAAAAGTAGGGGGACAGCTGAAAGAAGCTCTATTAGATACAGGAGCAGATGACACAGTATTAGAAGAAATAAATTTGCCAGGAAGATGGAAACCAAAAATGATAGGGGGAATTGGAGGTTTTATCAAGGTAAGACAATATGATCAGATACTTATAGAAATTTGTGGAAAAAAGGCTATAGGTACAGTATTAGTAGGACCTACACCTGTCAACATAATTGGACGAAATATGTTGACTCAGCTTGGTTGTACTTTAAACTTCCCCATAAGTCCTATTGATACTGTACCAGTAACATTAAAGCCAGGAATGGATGGACCAAAGGTTAAACAGTGGCCATTGACAGAAGAAAAAATAAAAGCATTA…
060614_2017_AE	~~~~~~~~~~~~~~~TGGCAACGACCCCTTGTCACAGTAAAAATAGGAGGACAGATGAAAGAAGCTCTATTAGATACAGGAGCAGATGATACAGTATTAGAAGATATAAATTTGCCAGGAAAATGGAAACCAAAAATGATAGGGGGAATTGGAGGTTTTATCAARGTAAGGCAATATGATCAGATACTTATAGAAATTTGTGGAAAAAAGGCTATAGGTACAGTRTTAGTAGGRCCTACACCTGTCAACATAATTGGACGAAATATGTTGACTCAAATTGGTTGTACTTTAAATTTCCCCATTAGTCCTATTGACACTGTACCAGTAAAATTAAAGCCAGGAATGGATGGACCAAARGTTAAACAATGGCCATTGACAGAAGAAAAAATAAAAGCATTA…
080812_2017_AE	~~~~~~~~~~~~~~~TGGCAACGACCMATTGTCACAGTAAAAATAGRAGGACAGCTAAAAGAAGCTCTATTAGATACAGGAGCAGATGATACAGTATTAGAAGATATAAATTTGYCAGGAAAATGGAAACCAAAAATGATAGGGGGAATTGGAGGTTTTATCAAAGTAAGRCAATATGATCAGRTAHMTATAGAAATTTGTGGAAARAAGGCTATAGGTACAGTATTAGTAGGACCTACACCTRTCAACATAATTGGACGAAATATGTTGACTCAGATTGGYTGTACTTTAAATCTCCCAATTAGTCCTATTGAGACTGTACCAGTACAATTAAAGCCAGGAATGGATGGRCCAAAGGTTAAACAGTGGCCATTGACAGAAGAAAAAATAAAAGCATTA…
102403_2017_AE	~~~~~~~~~~~~~~~TGGCAACGACCCCTTGTCACAATAAAAATAGGAGGGCAGCTGAAAGAGGCGCTATTAGATACAGGAGCAGATGATACAGTATTAGAAGATATAAACTTGCCAGGAAAATGGAAACCAAAAATGATAGGGGGAATTGGAGGTTTTATCAAAGTAAGGCAATATGATCAGATACTTATAGAAATTTGTGGAAAAAAGGCTATAGGTACAGTGTTAGTAGGACCTACACCTGTCAACATAATTGGACGAAATATGTTGACTCAGATTGGTTGTACTTTAAATTTCCCAATAAGTCCTATTGACACTGTACCAGTAAAATTAAAGCCAGGAATGGATGGACCAAAGGTTAAACAGTGGCCATTGACAGAAGAAAAAATAAAAGCATTA…
303621_2017_AE	CCTCAAATCACTCTTTGGCAACGACCCCTTGTCACAATAAAAATAGGAGGACAGCTAAAAGAAGCTCTATTAGATACAGGAGCAGATGATACAGTATTAGAAGATATAAATTTACCAGGAAAATGGAAACCAAAAATGATAGGGGGAATTGGAGGTTTTATCAAAGTAAGGCAATATGATCAGATAACTATAGAAATTTGTGGAAAAAGGGCTATAGGTACAGTGTTAGTAGGACCTACACCTGTCAACATAATTGGACGAAACATGTTGACTCAGCTTGGTTGCACTTTAAATTTCCCAATTAGTCCTATTGACCCTGTACCAGTAACATTAAAGCCAGGAATGGATGGACCAAAGGTTAAACAATGGCCATTGACAGAAGAAAAAATAAAAGCATTA…
303630_2017_AE	CCTCAAATCACTCTTTGGCAACGACCCCTTGTCACAATAAAAGTAGGGGGACAGCTGAAAGAAGCTCTATTAGATACAGGAGCAGATGACACAGTATTAGAAGAAATAAATTTGCCAGGAAGATGGAAACCAAAAATGATAGGGGGAATTGGAGGTTTTATCAAGGTAAGACAATATGATCAGATACTTATAGAAATTTGTGGAAAAAAGGCTATAGGTACAGTATTAGTAGGACCTACACCTGTCAACATAATTGGACGAAATATGTTGACTCAGCTTGGTTGTACTTTAAACTTCCCCATAAGTCCTATTGATACTGTACCAGTAACATTAAAGCCAGGAATGGATGGACCAAAGGTTAAACAGTGGCCATTGACAGAAGAAAAAATAAAAGCATTA…
081411_2018_AE	CCTCAAATCACTCTTTGGCAGCGACCCCTTGTCCCAGTAAAAGTAGGAGGACAGTTGAAAGAAGCTCTATTAGATACAGGAGCAGATGATACAGTATTAGAAGAAATAAATTTGCCAGGAAAATGGAAACCAAAAATGATAGGGGGAATTGGAGGTTTTATCAAAGTAAGACAATATGATCAGATACCTATAGAAATTTGTGGAAAAAAGGCTATAGGTACAGTGTTAGTAGGACCTACACCTGTCAACATAATTGGACGAAATATGTTGACTCAACTTGGTTGTACTTTAAATTTYCCAATWAGTCCTATTGACACTGTACCAGTATCATTAAAGCCAGGRATGGATGGACCAAAGGTTAAACAGTGGCCATTGACAGAAGAAAAAATAAAAGCATTA…
082117_2018_AE	cctcaaatcactctttggcaacgaccccttgtcacagtaaarrtagaaggacagttgagagaagctctactagatacaggagcagatgatacagtattagaagatataaatttgccaggaaaatggaaaccaaaaatgatagggggaattggaggttttatcaaagtaaggcaatatgatcagatacttatagaaatttgtggaaaaaaggctataggtacagtgttggtaggacctacacctrtcaacataattggacgaaatatgttgactcagcttggttgtactttaaatttcccaattagccctattgacactgtaccagtaacattaaagccaggaatggatggaccaaaggttaaacaatggccattgacagaagaaaaaataaaagcatta…
090408_2018_AE	~~~~~~~~~~~~~~~TGGCAACGACCCCTTGTCACAATAAGAATAGGAGGACAGCTGAAAGAAGCTCTATTAGATACAGGAGCAGATGATACAGTATTAGAAGATATAGATTTACCAGGAAAATGGAAACCAAAAATGATAGGGGGAATTGGAGGTTTTATCAAAGTAAGGCAATATGATCAGATACCTATAGAAATTTGTGGAAAAAGAGCTATAGGTTCAGTGTTAGTAGGACCTACACCTGTCAACATAATTGGACGAAATATGCTGACTCAGCTTGGTTGTACTTTAAATTTTCCAATTAGTCATATTGACACTGTACCAGTAACATTAAAGCCAGGAATGGATGGACCAAAAGTTAAACAGTGGCCATTGACAGAAGAAARAATAAAAGCATTA…
103019_2018_AE	CCTCAAATCACTCTTTGGCAACGACCCCTTGTCACAATAAAAATAGAAGGACAGCTAAGAGAAGCTCTATTAGATACAGGAGCAGATGATACAGTATTAGAAGATATAAATTTGCCAGGAAAATGGAAGCCAAAAATGATAGGGGGAATTGGAGGCTTTATCAAGGTAAGGCAATATGATCAGATACTTATAGAAATTTGTGGAAAAAAGGCTATAGGTACAGTGTTAGTAGGACCTACACCTGTCAACATAATTGGACGAAATATGTTGACTCAGCTTGGTTGTACTTTAAATTTCCCAATTAGTCCCATTGACACTGTACCAGTAACATTAAAGCCAGGGATGGATGGACCAAAGGTTAAACAGTGGCCATTGACAGAAGAAAAAATAAAAGCATTA…
304246_2019_AE	~~~~~~~~~~~~~~~TGGCAACGACCCCTTGTCACAATAAAAATAGRAGGACAGMTGAAAGAAGCTCTATTAGATACAGGAGCAGATGATACAGTATTAGAAGATATAAATTTGCCAGGAAAATGGAAACCAAAAATGATAGGGGGAATTGGAGGTTTTATCAAGGTAAGGCAATATGATCAGATAATGATAGAAATTTGTGGAAAAAAGGCTATAGGTACAGTGTTAGTAGGACCTACACCTGTCAACATAATTGGACGAAATATGTTGACTCAGATTGGTTGTACTTTAAATTTCCCAATTAGCCCTATTGACACTGTACCAGTAACATTAAAACCAGGAATGGATGGACCAAAGGTTAAACAGTGGCCATTGACAGAAGAAAAAATAATAGCRTTA…
030505_2019_AE	CCTCAAATCACTCTTTGGCARCGACCCCTAGTCACWATAAAARTAGGAGGACARCTAAGAGAAGCTCTATTAGATACAGGAGCAGATGATACAGTATTAGAAGAWATAAATYTGCCAGGAAAATGGAAACCAAAAATGATAGGGGGAATTGGAGGTTTTATCAAAGTAAGGCAATATGATCARATATCTATAGAAATTTGTGGAAARAGGGCTATAGGTACAGTGTTAGTWGGACCTACACCTATCAACATAATTGGACGAAATATGTTGACTCAGCTTGGTTGTACTTTAAATTTCCCAATTAGTCCTATTGACACTGTACCAGTAACATTAAAGCCAGGAATGGATGGACCAAARGTTAAACAGTGGCCAYTGACAGAAGAAAAAATAAAAGCATTA…
030502_2019_AE	CCTCAAATCACTCTTTGGCAACGACCCCTTGTCACAATAAAAATAGGGGGACAGCTAAGAGAAGCTCTATTAGATACAGGAGCAGATGATACAGTATTAGAAGATATAAATTTGCCAGGAAAATGGAAACCAAAAATGATAGGGGGAATTGGAGGTTTTATCAAAGTAAGGCAATATGATCAGATACTTATAGAAATTTGTGGAAAAAAGGCTATAGGTACAGTGTTAGTAGGGCCTACACCTGTCAACATAATTGGACGAAATATGTTGACTCAGCTTGGTTGTACTTTAAATTTCCCAATTAGTCCTATTGACACTGTACCAGTAACATTAAAGCCAGGAATGGATGGACCAAAGGTTAAACAGTGGCCATTGACAGAAGAAAAAATAAAGGCATTA…
040205_2019_AE	CCTCAAATCACTCTTTGGCAACGACCCCTCGTCACARTAAAAATAGGAGGACAGCTAAAAGAAGCTCTATTAGATACAGGAGCAGATGATACAGTGTTAGAAGATATAAATTTACCAGGAAAATGGAAACCAAAAATGATAGGGGGAATTGGAGGKTTTATCAAAGTAAGGCAATATGATCAGATAGYTATAGAAATTTGTGGAAAAAGGGCTRTAGGTACAGTGTTAGTAGGACCTACGCCWGTCAACATAATTGGACGAAATATGTTGACTCAGATTGGTTGTACTTTAAATTTTCCAATTAGTCCTATTGAAACTGTACCAGTAAAATTAAAGCCAGGAATGGATGGGCCAAAGGTTAAACAGTGGCCATTGACAGAAGAAAAAATARAAGCATTA…
040212_2019_AE	CCTCAAATCACTCTTTGGCAACGACCCCTTGTCACAATAAAAATAGAAGGACAGCTAAGAGAAGCTCTATTAGATACAGGAGCAGATGATACAGTATTAGAAGATATAAATTTGCCAGGAAAATGGAARCCAAAAATGATAGGGGGAATTGGAGGTTTTATCAAAGTAAGGCAATATGATCAGATACTTATAGAAATTTGTGGAAAGAAGGCTATAGGTACAGTGTTAGTAGGACCTACACCTGTCAACATAATTGGACGAAATATGTTGACTCAGCTTGGTTGTACCTTAAACTTTCCAATTAGTCCTATTGACACTGTACCAGTAAAATTAAAGCCAGGRATGGAYGGGCCAAAAGTTAAACAGTGGCCATTGACAGAAGAAAAAATAAAAGCATTA…
052801_2019_AE	CCTCAAATCACTCTTTGGCAACGACCCCTTGTCACAGTAAAAATAGGAGGACAGCAGAGAGAAGCTCTATTAGATACAGGAGCAGATGATACAGTATTAGAAGATATAAATTTGCCAGGAAAATGGAAACCAAAATTGATAGGGGGAATTGGAGGTTTTATCAAAGTAAGGCAATATGATCAGATACTTATAGAAATTTGTGGAAAAAAGGCTATAGGTACAGTRTTAGTAGGACCTACACCTGTCAACATAATTGGACGAAATATGYTGACACAGATTGGTTGTACTTTAAATTTTCCAATAAGTCCTATTGACACTGTACCAGTAACATTAAAGCCAGGAATGGATGGACCAAAAGTTAAACAGTGGCCATTGACAGAAGAAAAAATAAAAGCATTA…
061104_2019_AE	CCTCAAATCACTCTTTGGCAACGACCCCTTGTCACAATAAAAATAGGAGGACAGGTGAAAGAAGCTCTATTAGATACAGGAGCAGATGATACAGTGTTAGAAGATATAAATTTACCAGGAAAATGGAAACCAAAAATGATAGGGGGAATCGGAGGTTTTATCAAAGTAAGACAATATGATCAGATAACTATAGAAATTTGTGGAAAAAAGGCTATAGGTACAGTGTTGGTAGGACCTACACCTGTCAACATAATTGGACGAAATATGTTGACTCAGCTTGGTTGTACTTTAAATTTTCCAATTAGTCCTATTAACACTGTACCAGTAACATTAAAGCCAGGAATGGATGGGCCAAAGGTTAAACAATGGCCATTGACAGAAGAAAAAATAAAAGCATTA…
Liumingyu_2019_AE	CCTCAAATCACTCTTTGGCAACGACCCCTTGTCACAATAAAAATAGGAGGGCAGCTAAGAGAAGCTCTATTAGATACAGGAGCAGATGATACAGTATTAGAAGATATAAATTTGCCAGGAAAATGGAAACCAAAAATGATAGGAGGAATTGGAGGTTTTATCAAGGTAAGGCAATATGATCAGATACCTATAGAAATTTGTGGAAAAAAGGCTATAGGTACAGTGTTGGTAGGACCTACACCTGTCAACATAATTGGGCGAAATATGTTGACTCAACTTGGTTGTACTTTAAATTTCCCAATTAGTTCTATTGACACTGTACCAGTAACATTAAAGCCAGGAATGGATGGACCAAAGGTTAAACAGTGGCCATTGACAGAAGAAAAAATAAAAGCATTA…
092411_2019_AE	CCTCAAATCACTCTTTGGCAACGACCYCTTGTCACAGTAAAAATAGAAGGACAGCTGAAAGAAGCTCTATTAGATACAGGAGCAGATGATACAGTATTAGAAGATATAAATTTGTCAGGAAAATGGAAACCAAAAATGATAGGGGGAATTGGAGGTTTTATTAAAGTAAGGCAATATGATCAGATACTTATAGAAATTTGTGGAAAAAGRGCTATAGGTACAGTGTTAGTAGGACCTACACCTGTCAACATAATTGGACGAAATATGTTGACTCAGATTGGTTGTACTTTAAATTTCCCAATTAGTCCTATTGACACTGTACCAGTAACATTAAAGCCAGGAATGGATGGACCAAAGGTTAAACARTGGCCATTGACAGAAGAAAAAATAAAAGCATTG…
112603_2019_AE	CCTCAAATCACTCTTTGGCAGCGACCCCTTGTCACAATAAAAATAGGAGGACAGCTAAGAGAAGCTCTATTAGATACAGGAGCAGATGATACAGTATTAGAAGATATAGATTTGCCAGGAAAATGGAAACCAAAAATGATAGGGGGAATTGGAGGTTTTATCAAAGTAAGGCAATATGATCAGGTACCTATAGAAATTTGTGGAAAAAGGGCTATAGGTACAGTGTTAGTAGGACCTACACCTGTCAACATAATTGGACGAAATATGTTGACTCAGCTTGGTTGTACGTTAAATTTCCCAATTAGTCATATTGACACTGTACCAGTAACATTAAAGCCAGGAATGGATGGACCAAAGGTTAAACAGTGGCCATTGACAGAAGAAAAAATAAAAGCATTA…
032930_2016_AE	~~~~~~~~~~~~~~~TGGCAACGACCCCTYGTCACAATAAAARTAGGAGGACAGCTAAAAGAAGCTCTATTAGAYACAGGAGCAGATGATACAGTATTAGAAGATATAAATTTACCAGGGAAATGGAAACCAAAAATGATAGGRGGAATTGGAGGTTTTATCAARGTAAGRCAATATGATCAGATACTTATAGAAATTTGTGGAAAAAGGGCTATAGGTACAGTATTAGTAGGACCTACACCTGTCAACATAATTGGACGAAATATGTTGACTCAGATTGGTTGTACTTTAAATTTCCCAATTAGTCCTATTGACACTGTACCAGTAACATTAAAGCCAGGAATGGATGGACCAAAGGTTAAACAGTGGCCATTGACAGAAGAAAAAATAAAAGCATTA…
042608_2016_AE	~~~~~~~~~~~~~~~TGGCAACGACCCSTTGTCACAATAAAAATAGGGGGACAACTAAAAGAAGCTCTATTAGATACAGGAGCAGATGATACAGTATTAGAAGATATAAATTTGCCAGGAAAATGGAAACCAAAAATGATAGGGGGAATTGGAGGTTTTATCAAGGTAARGCAATATGATCAGATACTTATAGAAATTTGTGGAAAAAAGGCTATAGGTACAGTATTAGTAGGACCTACACCTGTCAACATAATTGGACGAAATATGTTGACTCAAATTGGTTGTACTTTAAATTTCCCCATTAGTCCTATTGAAACTGTACCAGTAAAATTAAAGCCAGGAATGGATGGACCAAAGGTTAAACAGTGGCCATTGACAGAAGAAAAAATAAAAGCATTA…
042623_2016_AE	~~~~~~~~~~~~~~~TGGCAACGACCCCTAGTCACAATAAAAGTAGGAGGGCAGCTGAAAGAAGCTCTATTAGATACAGGAGCAGATGATACAGTATTAGAAGATATAAATTTGCCAGGAAAATGGAAACCAAAAATGATAGGGGGAATTGGAGGTTTTATCAAAGTAAGGCAATATGATCAGATACTTATAGAAATTTGTGGAAAAAAGGCTGTAGGTACAGTGTTAGTAGGACCTACACCTGTCAACATAATTGGACGAAATATGTTGACCCARATTGGTTGTACTTTAAATTTTCCAATTAGTCCTATTGACACTGTACCAGTAACATTAAAACCAGGAATGGATGGACCAAAGGTTAAACAGTGGCCATTGACCGAAGAAAAAATTAAAGCATTA…
082303_2016_AE	~~~~~~~~~~~~~~~TGGCAACGACCCMTTGTCACAGTAAAAATAGGAGGACAGCTGAAAGAAGCTCTATTAGATACAGGAGCAGATGATACAGTATTAGAAGATATAGATTTGCCAGGAAAATGGAAACCAAAAATGATAGGGGGAATTGGAGGTTTTATCAAAGTAAGGCAATATGATCAGATATCTATAGAAATTTGTGGAAAAAAGGCTATAGGTACAGTGTTRGTAGGACCCACACCTGTCAACATAATTGGACGAAATATGTTGACCCAGATTGGTTGTACTTTAAATTTCCCAATTAGTCCTATTRACACTGTACCAGTAACATTAAAGCCAGGAATGGATGGACCAAAGGTTAAACAGTGGCCATTGACAGAAGAAAAGATAAAAGCATTA…
051604_2017_AE	~~~~~~~~~~~~~~~TGGCAACGACCCCTTGTCACAATAAAAATAGAAGGACAGCTAAAAGAAGCTCTATTAGATACAGGAGCAGATGATACAGTATTAGAAGATATAAATTTGCCAGGAAAATGGAAACCAAAAATGATAGGGGGAATTGGAGGTTTTATCAAAGTAAGGCAATATGATGAGATACCTATAGAAATTTGTGGAAAAAAGGCTATAGGTACAGTGTTAGTAGGACCTACACCTGTCAACATAATTGGACGAAATATGTTGACTCAGCTTGGTTGTACTTTAAATTTTCCAATCAGTCCTATTGAAACTGTACCAGTACAATTAAAGCCAGGAATGGATGGACCAAAGGTTAAACAGTGGCCATTGACAGAAGAAAAAATAAAAGCATTA…
010825_2019_AE	CCTCAAATCACTCTTTGGCAACGACCCMTTGTCACAATAAAAATAGAAGGACAACTAAAAGAAGCTCTATTAGATACAGGAGCAGATGATACAGTATTAGAAGATATAAATTTGCCAGGAAGATGGAARCCAAAAATGATAGGGGGAATTGGAGGTTTTATCAAAGTAAGACAATATGATCAGATACYTATAGAAATTTGTGGAAAAAGGGCTRTAGGTACAGTGTTAGTAGGACCTACACCTGTCAACATAATTGGACGAAATATGTTGACTCAGCTTGGTTGTACTTTAAATTTCCCAATTAGYCCTATTGACACTGTACCAGTAACATTAAARCCAGGAATGGATGGACCAAAGGTTAAACAGTGGCCATTGACAGAGGAAAAAATAAAGGCATTA…
022616_2019_AE	CCTCAAATCACTCTTTGGCAACGACCCCTTGTCACAGTAAAAATAGAAGGACAGCTAAAAGAAGCTCTATTAGATACAGGAGCAGATGATACAGTATTAGAAGATATAGATTTGCCAGGAAAATGGAAACCAAAAATGATAGGGGGAATTGGAGGTTTTATTAAAGTAAGGCAATATGATCAGATACTTATAGAAATTTGTGGAAAAAGGGCTATAGGTACAGTGTTAGTAGGACCTACACCTGTCAACATAATTGGACGAAATATGTTGACTCAGATTGGTTGTACTTTAAATTTTCCAATTAGTCCCATTGACACTGTACCAGTAAAATTAAAGCCAGGAATGGATGGACCAAAGGTTAAACAGTGGCCATTAACAGAAGAAAAAATAAAAGCATTG…
030501_2019_AE	CCTCAAATCACTCTTTGGCARCGACCMKTAGTCACARTAAAAATAGRAGGACAGCTAAAAGAAGCTCTATTAGATACAGGAGCAGATGATACAGTATTAGAAGATATAAATTTGCCAGGAAAATGGAAACCAAAAATGATAGGGGGAATTGGRGGTTTTATCAAAGTAAGGCAATATGATCAGATAAYTATAGAAATTTGTGGAAAAAAGGCTATAGGTACAGTRTTAGTAGGACCTACACCTGTCAACATAATTGGRCGAAATATGTTGACTCAGATTGGTTGTACTTTAAATTTCCCAATTAGTCCTATTGACACTGTACCRGTATCATTAAAGCCAGGAATGGATGGRCCAAAGGTTAAACAGTGGCCATTGACAGAAGAAAAAATTAAAGCATTA…
072312_2019_AE	CCTCAAATCACTCTTTGGCAACGACCCCTTGTCACAATAAAAATAGGAGGACAGCTAAAAGAAGCTCTATTAGATACAGGAGCAGATGATACAGTATTAGAAGATATAAATTTGCCAGGAAAATGGAAACCAAAAATGATAGGGGGAATTGGAGGTTTTATCAAAGTAAGACAATATGATCAGATACCTATAGAAATTTGTGGAAAAAGGGCTATAGGTACAGTGTTAATAGGACCTACACCTRTCAACATAATTGGACGAAATATGTTGACTCAGCTTGGTTGTACTTTAAATTTCCCAATTAGTCCTATTGACACTGTACCAGTARCATTAAAGCCAGGAATGGATGGACCAAAAGTTAAACAGTGGCCATTGACAGAAGAAAAAATAAAAGCATTA…
304601_2019_AE	CCTCAAATCACTCTTTGGCAGCGACCCCTTGTCACAATAAAAATAGAAGGACAGCTRAGAGAAGCTCTATTAGATACAGGAGCAGATGATACAGTATTAGAAGATATAAATTTGCCAGGAAAATGGRAACCAAAAATGATAGGGGGAATTGGAGGTTTTATCAAAGTAAGGCAATATGATCAGATACTYATAGAAATTTGTGGRAAAAAGGCTATAGGTACAGTGTTAGTAGGACCTACACCTRTCAACATAATTGGACGAAATATGTTGACTCAGMTAGGTTGTACCTTAAACTTTCCAATTAGTCATATTGAMACTGTACCAGTAAAATTAAARCCAGGAATGGATGGGCCAAAGGTTAAACARTGGCCATTGACAGAAGAAAAAATAAAAGCATTA…
110806_2016_AE	~~~~~~~~~~~~~~~TGGCAACGACCCCTTGTCACAATAAAAATAGGGGGACAACTAAAAGAAGCTCTATTAGATACAGGAGCAGATGATACAGTATTAGAAGATATAAATTTGCCAGGAAAATGGAAACCAAAAATGATAGGGGGAATTGGAGGTTTTATCAAGGTAAGGCAATATGATCAGATACTTATAGAAATTTGTGGAAAAAAGGCTATAGGTACAGTGTTAGTAGGACCTACACCTGTCAACATAATTGGACGAAATATGTTGACTCAAATTGGTTGTACTTTAAATTTCCCCATTAGCCCTATTGACACTGTACCAGTAAARTTAAAGCCAGGAATGGATGGACCAAAGGTTAAACAGTGGCCATTGACAGAAGAAAAAATAAAAGCATTA…
010804_2019_AE	CCTCAAATCACTCTTTGGCAACGACCCCTTGTCACAATAAAAATAGGAGGGCAGTTAAGAGAAGCTCTATTAGATACAGGAGCAGATGATACAGTATTAGAAGATATAAATTTGCCAGGAAAATGGAAACCAAAAATGATAGGGGGAATTGGAGGTTTTATCAAGGTAAGGCAATATGATCAGATACCTATAGAAATTTGTGGAAAAAAGGCTATAGGTACAGTGTTAGTAGGACCTACACCTGTCAACATAATTGGACGAAATATGTTGACTCAGCTTGGTTGTACTTTAAATTTCCCAATTAGYCCTATTGACACTGTACCAGTAACATTAAAGCCAGGAATGGATGGACCAAAGGTTAAACAGTGGCCATTGACAGAARAAAAAATAAAAGCATTA…
619020_2019_AE	CCTCAAATCACTCTTTGGCAGCGACCCCTYGTCACAATAAAAATAGGAGGACAGCTGAAAGAAGCTCTATTAGATACAGGAGCAGATGATACAGTGTTAGAAGATATAAATTTACCAGGAAAATGGAAACCAAAAATGATAGGGGGAATTGGAGGTTTTATCAAAGTAAGGCAATATGATCAGATACTTATAGAAATTTGTGGAAAAAAGGCTATAGGTACAGTGTTAGTAGGACCTACACCTGTCAACATAATTGGACGAAATATGTTGACTCAGATTGGTTGTACTTTAAATTTTCCAATTAGCCCTATTGACACTGTACCAGTAACATTAAAGCCAGGAATGGATGGRCCAAAGGTTAAACAGTGGCCATTGACAGAAGAAAAAATAAAAGCATTA…
323804_2019_AE	cctcaaatcactctttggcaacgacccctygtcacaataaaagtaggaggagagttgagagaagctctattagatacaggagcagatgatacagtgttagaagacataaatttaccaggaaaatggaaaccaaaaatgatagggggaattggaggttttatcaaggtaaggcaatatgatcaaatacttatagaaatttgtggaaaaaaggctataggtacagtgttagtaggacctacacctgtcaacataattggacgaaacatgttgactcagctkggttgtactttaaattttccaattagtcctattgaccctgtaccygtaacattaaarccaggaatggatgggccaaaggttaaacagtggccattgacagaagaaaaaataaaagcayta…
071605_2019_AE	CCTCAAATCACTCTTTGGCAGCGACCCCTTGTCACAGTAAAAATAGAAGGACAGTTGAAAGAAGCTCTATTAGACACAGGAGCAGATGATACAGTCTTAGAAGATATAAATTTGCCAGGAAAATGGAAACCAAAAATGATAGGGGGAATTGGAGGTTTTATCAARGTRAAGCAATATGATCAGATACTTATAGAAATTTGTGGAAAAAGRGCTATAGGTACAGTATTAGTAGGACCTACACCTGTCAACATAATTGGACGAAATATGTTGACTCAGATTGGTTGTACTTTAAATTTCCCAATTAGTCCTATTGACACTGTACCAGTAACATTAAAACCAGGAATGGATGGGCCAAAGGTTAAACAGTGGCCATTAACAGAAGAAAAAATAAAAGCATTA…
121707_2019_AE	CCTCAAATCACTCTTTGGCARCGACCCCTCGTCACWATAARAGTAGGAGGACAGCTGAAAGAAGCTCTATTAGATACAGGAGCAGATGATACAGTGTTAGAGGAGATAAATTTACCAGGAAAATGGAAACCAAAAATGATAGGGGGAATTGGAGGTTTTATCAAGGTAAGGCAATATGATCAAATACTTATAGAAATTTGTGGRAAAAAGGCTATAGGTACAGTGTTAGTAGGACCTACACCTGTCAACATAATTGGACGAAATATGTTGACTCAGCTTGGTTGTACTTTAAATTTTCCAATTAGTCCTATTGACACTGTACCAGTAAAATTAAAGCCAGGAATGGATGGGCCAAAGGTTAAACAGTGGCCATTGACAGAAGAAAAAATAAAAGCATTA…
010507_2016_AE	~~~~~~~~~~~~~~~TGGCAACGACCCCTTGTCACAGTAAAAGTAGGAGGACAGATGAAAGAAGCTCTATTAGATACAGGAGCAGATGATACAGTATTAGAAGATATAAATTTGCCAGGAAAATGGAAACCAAAAATGATAGGGGGAATTGGAGGTTTTATCAAGGTAAGACAGTATGATCAGATACTTATAGAAATTTGTGGAAAAAAGGCTATAGGTACAGTGTTAGTAGGACCTACACCTGTCAACATAATTGGACGAAATATGTTGACTCAGATTGGTTGTACTTTAAATTTCCCAATTAGCCCTATTGACACTGTACCAGTAACATTAAAGCCAGGAATGGATGGACCAAAGGTTAAACAGTGGCCATTAACAGAAGAAAAAATAAAGGCATTA…
010509_2016_AE	~~~~~~~~~~~~~~~TGGCAACGACCCCTCGTCACAATAAAAATAGGAGGACAGATGAGAGAAGCTCTATTAGATACAGGAGCAGATGATACAGTATTAGAAGATATAAATTTGCCAGGAAAATGGAAACCAAAAATGATAGGGGGAATTGGAGGTTTTATCAAGGTAARGCAATATGATCAGATAYCTATAGAAATTTGTGGAAAAAAGGCYATAGGTACAGTGTTAGTAGGACCTACACCTATCAACATAATTGGACGAAATATGTTGACTCAGCTTGGTTGTACTTTAAATTTYCCAATTAGCCCTATTGACACTGTACCAGTAAAATTAAAGCCAGGAATGGATGGACCAAARGTTAAACAGTGGCCATTAACAGAAGAAAAAATAAAAGCATTA…
010514_2016_AE	~~~~~~~~~~~~~~~TGGCAACGACCCCTTGTCACAGTAAAAATAGGAGGACAGATGATAGAAGCCCTGTTAGATACAGGAGCAGATGATACAGTATTAGAAGATATAAATTTGCCAGGAAAATGGAAACCAAAAATGATAGGGGGAATTGGAGGTTTTATCAAAGTAAGGCAATATGATCAGATACTTATAGAAATTTGTGGGAAAAAGGCTATAGGTACAGTGTTAGTAGGACCTACACCTGTCAACATAATTGGRCGAAATATGTTGACTCAGMTTGGTTGTACTTTAAATTTCCCAATTAGCCCTATTGACACTGTACCAGTAAAATTAAAGCCAGGAATGGATGGACCAAAAGTTAAACAATGGCCATTAACAGAAGAAAAAATAAAAGCATTA…
010516_2016_AE	~~~~~~~~~~~~~~~TGGCAACGACCCCTTGTYACAATAAAAATAGGAGGACAGATGAAAGAAGCTCTATTAGATACAGGAGCAGATGATACAGTATTAGAAGATATAAATTTGCCAGGAAAATGGAAACCAAAAATGATAGGGGGAATTGGAGGTTTTATYAARGTAAGGCAATATGATCAGATAYCTATAGAAATTTGTGGAAAAARGGCTATAGGYACAGTGTTAGTAGGACCTACACCTATCAACATAATTGGACGAAATATGTTGACTCAGCTTGGTTGTACTTTAAATTTCCCAATTAGCCCTATTGACACTGTACCAGTAACATTAAARCCAGGAATGGATGGACCAAAGGTTAAACAATGGCCATTAACAGAAGARAAAATAAAAGCATTA…
010517_2016_AE	cctcaaatcactctttggcaacgaccccttgtcccagtaaaaataggaggacagatgaaagaagctctattagatacaggagcagatgatacagtattagaagatataaatttgccaggaaaatggaaaccaaaaatgatagggggaattggaggttttatcaaggtaaggcaatatgatcagataactatagaaatttgtggaaaaagggctataggttcagtgttagtagggcctacacctatcaacataattggacgaaatatgttgactcagcttggttgtactttaaatttcccaatcagccctattgacactgtaccagtaacattaaagccaggaatggatggaccaaaggttaaacagtggccattaacagaagaaaaaataaaagcatta…
011202_2016_AE	~~~~~~~~~~~~~~~TGGCAACGACCCCTTGTCACARTAAAAGTAGGAGGACAGATGAGAGAAGCTCTATTAGATACAGGAGCAGATGATACAGTATTAGAAGATATAAATTTGCCAGGAAAATGGAAACCAAAAATGATAGGGGGAATTGGAGGTTTTATCAAGGTAAARCAATATGATCAGATACTTATAGAAATTTGTGGAAAAAAGGCTATAGGTACAGTGTTARTAGGACCTACACCTATCAACATAATTGGACGAAATATGTTGACTCAGCTTGGTTGTACTTTAAATTTCCCAATTAGYCCTATTGACACTGTACCAGTAACATTAAAGCCAGGAATGGATGGACCAAAGGTTAAACAGTGGCCATTAACAGAAGAAAAAATAAAGGCACTA…
302828_2016_AE	CCTCAAATCACTCTTTGGCAACGACCCCTTGTCCCAATAAAAATAGAAGGACAGCTGAGAGAAGCTCTATTAGATACAGGAGCAGATGACACAGTATTAGAAGATATAAATTTGCCAGGAAAATGGAAACCAAAAATGATAGGGGGAATTGGAGGTTTTATCAAGGTAAGGCAATATGATCAAATAGGTATAGAAATTTGTGGAAAAAAGGCTATAGGTACAGTGTTAGTAGGACCTACACCTGTCAACATAATTGGACGAAATATGTTGACCCAGCTTGGTTGTACTTTAAATTTCCCAWTTAGYCCTATTGACACTGTACCAGTAACATTAAAGCCAGGAATGGATGGACCAAAGGTTAAACAGTGGCCATTAACAGAAGAAAAAATAAAAGCATTA…
302535_2016_AE	cctcaaatcactctttggcaacgaccccttgtcacagtaaaaataggaggacagatgaaagaagctctattagatacaggagcagatgatacagtattagaagatataaatttgccaggaaaatggaaaccaaaaatgatagggggaattggaggttttatcaaggtaaaacaatatgatcagatacttatagaaatttgtgggaaaaaggctataggtacagtgttagtaggaccgacgcctgtcaacataattggacgaaatatattagctcagattgggtgtactttaaatttaccaattagccctattgaaactgtaccagtaaaattaaagccaggaatggatggaccaaaggttaaacagtggccattaacagaagaaaaaataaaagcatta…
302532_2016_AE	cctcaaatcactctttggcaacgaccccttgtcacagtaaagataggaggacagatgaaagaagctctgttagatacaggagcagatgatacagtattagaagatataaatttgccaggaaaatggaaaccaaaaatgatagggggaattggaggttttatcaaggtaagacaatatgatcagatacttatagaaatttgtgggaaaaaagctataggtacagtgttagtaggacctacacctgtcaacataattggacgaaatatgttgactcagattggttgtactttaaatttcccaattagccctattgacactgtaccagtaacattaaagccaggaatggatggaccaaaggttaaacagtggccattaacagaagaaaaaataaaagcattg…
011912_2016_AE	~~~~~~~~~~~~~~~TGGCAACGACCCCTTGTCCCAATAAAAATAGGAGGACAGATGAAAGAAGCTCTATTAGATACAGGAGCAGATGATACAGTATTAGAAGATATAAATTTGCCAGGAAAATGGAAACCAAAAATGATAGGGGGAATTGGAGGTTTTATCAAGGTAAGGCAATATGATCAGATACCTATAGAAATTTGTGGAAAAARGGCTATAGGTACAGTGTTAGTAGGACCTACACCTATCAACATAATTGGACGAAACATGTTGACTCAGCTTGGCTGTACTTTAAATTTCCCAATTAGCCCTATTGACACTGTACCAGTAACATTAAAGCCAGGAATGGATGGACCAAAGGTTAAACAGTGGCCATTAACAGAAGAAAAAATAAAAGCATTA…
011919_2016_AE	~~~~~~~~~~~~~~~TGGCAACGACCCCTTGTCTCAATAAGAATAGGAGGACAGATAAAAGAAGCTCTATTAGATACAGGAGCAGATGATACAGTATTAGAAGAGATAAATTTGCCAGGAAAATGGAAACCAAAAATGATAGGGGGAATTGGAGGTTTTATCAAGGTAAGGCAATATGATCAGATACCCATAGAAATTTGTGGAAAAAAGGCTATAGGTACAGTGTTAGTAGGACCTACACCTGTCAACATAATTGGACGAAACCTGTTGACTCAGCTTGGGTGTACTTTGAATTTCCCAATTAGCACTATTGACACTGTACCAGTAACATTAAAGCCAGGAATGGATGGACCAAAGGTTAAACAGTGGCCATTAACAGAAGAAAAAATAAAAGCATTA…
012613_2016_AE	~~~~~~~~~~~~~~~TGGCAACGACCCCTTGTCACAGTAAGAATAGAAGGACAGATGAAAAAGGCTCTATTAGATACAGGAGCAGATGATACAGTATTAGAAGATATAAATTTGCCAGGAAAATGGAAACCAAAAATGATAGGGGGAATTGGAGGTTTTATCAAGGTAAGGCAATATGATCAGATACTTATAGAAATTTGTGGAAAAAAAGCTATAGGTACAGTGTTAGTAGGACCTACACCTATCAACATAATTGGACGAAACATGTTGGCTCAGATTGGTTGTACTTTGAATCTCCCAATCAGCCCTATTGACACTGTACCAGTAACATTAAAGCCAGGAATGGATGGACCAAAGGTTAAACAGTGGCCATTAACAGAAGAAAAAATAAAAGCATTA…
012619_2016_AE	~~~~~~~~~~~~~~~TGGCAACGACCCCTTGTCACAGTAAAAATAGAAGGACAATTAAAAGAAGCTCTATTAGATACAGGAGCAGATGATACAGTATTAGAAGATATAGATTTGCCAGGAAAATGGAAACCAAAAATGATAGGAGGAATCGGAGGTTTTATTAAGGTAAGGCAATATGATCAGATACTTATAGAAATTTGTGGAAAAAGGGCTATAGGTACAGTGTTAGTAGGACCTACACCTGTCAACATAATTGGACGAAATATGTTGACTAAAATTGGTTGCACTTTAAATTTCCCAATTAGCCCTATTGACACTGTRCCAGTAACATTAAAGCCAGGAATGGATGGACCAAAGGTTAAACAGTGGCCATTAACAGAAGAAAAAATAAAAGCATTA…
020209_2016_AE	~~~~~~~~~~~~~~~TGGCAACGACCCCTTGTYACAATAAAAATAGGAGGACAGATAAAAGAAGCTCTATTAGATACAGGAGCAGATGATACAGTATTAGAAGATATAAATTTGCCAGGAAAATGGAAACCAAAAATGATAGGGGGAATTGGAGGTTTTATCAAGGTAAGGCAATATGATCAGATAGKTATAGAAATTTGTGGAAAAARGGCTATAGGTACAGTGTTAGTAGGACCTACACCTATCAACATAATTGGACGRAATATGTTGACTCAGCTTGGTTGTACTTTAAATTTCCCAATTAGCCCTATTGACACTGTACCAGTAAAATTAAAGCCAGGAATGGATGGACCAAAGGTTAAACAGTGGCCATTAACAGAAGAAAAAATCAAAGCGTTA…
020215_2016_AE	~~~~~~~~~~~~~~~TGGCAACGACCCCTTGTCACAGTAAAAGTAGGAGGACAGATGATAGAAGCTCTATTAGATACAGGAGCAGATGATACAGTATTAGAAGATATAAATTTGCCAGGAAAATGGAAACCAAAAATGATAGGGGGAATTGGAGGTTTTATTAARGTAAGACAATATGATCAGATACTTATGGAAATTTGTGGGAAAAGGGCTRTAGGTACAGTGTTAGTAGGACCTACACCTGTCAACATAATTGGACGAAATATGTTGACTCAGATTGGTTGTACTTTAAATTTCCCAATTAGCCCTATTGACACTGTACCAGTAACATTAAAGCCAGGAATGGATGGACCAAAGGTTAAACAGTGGCCATTAACAGAAGAAAAAATAAAAGCATTA…
020219_2016_AE	~~~~~~~~~~~~~~~TGGCAACGACCCCTTGTCACAGTAAAAATAGGAGGACAGATGAGAGAAGCTCTATTAGATACAGGAGCAGATGATACAGTATTAGAAGATATAAATTTGCCAGGAAAATGGAAACCAAAAATGATAGGGGGAATTGGAGGTTTTATCAAGGTAAGGCAGTATGATCAGATAATTCTAGAGATTTGTGGGAAAAAAGCTATAGGTACAGTGTTGGTAGGACCTACACCTATCAACATAATTGGACGAAATATGTTGGCTCAAATTGGTTGTACTTTAAATCTCCCAATTAGCCCTATTGACACTGTACCAGTAACATTAAAGCCAGGAATGGATGGGCCAAAGGTTAAACAGTGGCCATTAACAGAGGAAAAAATAAAAGCATTA…
022301_2016_AE	~~~~~~~~~~~~~~~TGGCAACGACCCCTTGTCACAGTAAAAATAGGAGGRCARATGAAAGAAGCTCTATTAGATACAGGAGCAGATGATACAGTATTAGAAGATATAAATTTGCCAGGAAAATGGAAACCAAAAATGATAGGGGGAATTGGRGGTTTTATCAARGTAAGGCAATATGATCAGATAYCTATAGAAATTTGTGGAAAAAGGGCTATWGGTACAGTGTTAATAGGACCTACACCTRTCAACATAATTGGACGAAATATGTTGACTCAGATTGGTTGTACTTTAAATTTCCCAATTAGCCCTATTGACACTGTACCAGTAACATTAAAGCCAGGAATGGATGGACCAAAGGTTAAACAGTGGCCATTAACAGAAGAAAAAATAAAAGCATTA…
022321_2016_AE	~~~~~~~~~~~~~~~TGGCAACGACCCCTTGTCACAATAAAAATAGGAGGACAGGTAAAAGAAGCTCTATTAGATACAGGAGCAGATGATACAGTATTAGAAGATATAAATTTGCCAGGAAAATGGAAACCAAAAATGATAGGGGGAATTGGAGGTTTTATCAAGGTTAGGCAATATGATGAGATACCTATAGAAATTTGTGGAAAAAAGGCTATAGGTACAGTGTTAGTAGGRCCTACACCTATCAACATAATTGGACGAAATATGTTGACTCAGCTTGGTTGTACTTTAAATTTCCCAATTAGCCSTATTRRCACTGTACCAGTAAMATTAAAACCAGGAATGGATGGACCAAAGGTTAAACAATGGCCATTAACAGAAGAAAAAATAAAAGCATTA…
022323_2016_AE	cctcaaatcactctttggcaacgaccccttgtcccagtaaaaataggaggacaaataaaagaagctctattagatacaggagcagatgatacagtattagaagatataaatttgccaggaaaatggaaaccaaaaatgatagggggaattggaggttttatcaaggtaaggcaatatgatcagataactatagaaatttgtggaaaaagggctataggttcagtgttagtaggacctacacctatcaacataattggacgaaatatgttgactcagcttggttgtactttaaatttcccaatcagccctattgacactgtaccagtaacattaaagccaggaatggatggaccaaaggttaaacagtggccattaacagaagaaaaaataaaagcatta…
030115_2016_AE	~~~~~~~~~~~~~~~TGGCAACGACCCCTTGTCACAATAAAAATAGGAGGACAGCTGAAAGAAGCTCTATTAGATACAGGAGCAGATGATACAGTATTAGAAGATATAAATTTGCCAGGAAAATGGAAACCAAAAATGATAGGGGGAATTGGGGGTTTTATCAAAGTAAGGCAATATGATCAGATACCTATAGAAATTTGTGGAAAAAAGGCTATAGGTACAGTGTTAGTAGGACCTACACCTGTCAACATAATTGGACGAAATATGTTGACCCAGCTTGGTTGTACTTTAAATTTCCCAATTAGCCCTATTGATACTGTACCAGTAACATTAAAACCAGGAATGGATGGACCAAGGGTTAAACAGTGGCCATTAACAGAAGAAAAAATAAAAGCATTA…
030117_2016_AE	~~~~~~~~~~~~~~~TGGCAACGACCYCTTGTCYCAATAAARATAGRAGGACARATAAAAGAAGCTCTATTAGATACAGGAGCAGATGATACAGTATTAGAAGATATAAATTTGCCAGGAAAATGGAARCCAAAAATGATAGGGGGAATTGGAGGTTTTATCAARGTAARACAATATGAARATATAWYAATAGAGATCTGTGGAAAAAAGGCTATAGGTACAGTGTTAGTAGGACCTACACCTATCAACATAATTGGACGAAATATGTTGACTCARCTTGGTTGTACTTTAAATTTCCCAATTAGYCCTATTGACACWGTACCAGTAAAATTAAAGCCAGGAATGGATGGACCAAAGRTTAAACAGTGGCCATTAACAGMAGAAAAAATAAAAGCATTA…
302566_2016_AE	cctcaaatcactctttggcagcgaccccttgtcacaataaaaatagagggacagataaaagaagctctattagatacaggagcagatgatacagtattagaagatatagatttgccaggaaaatggaaaccaaaaatgatagggggaattggaggttttatcaaggtaaggcaatatgatcagatacttatagaaatttgtggaaaaagggctataggtacagtgttagtaggacctacacctgtcaacataattggacgaaatatgttgactcagcttggttgtactttaaatttcccaattagccctattgacactgtaccagtaaaattaaagccaggaatggatggaccaaaggttaaacagtggccattaacagaagaaaaaataaaagcatta…
302594_2016_AE	cctcaaatcactctttggcaacgaccccttgtcacagtaaaaatagaaggacagataaaagaagctctattagatacaggagcagatgatacagtattagaagatataaatttgccaggaaaatggaaaccaagaatgatagggggaattggaggttttatcaaagtaaggcaatatgatcagatacttatagaaatttgtggaaaaaaggctataggcacagtgttagtaggacctacacctgtcaacataattggacgaaatatgttgactcaaattggttgtactttaaatttcccaattagccctattgacactgtaccagtraaattaaagccaggaatggatggaccaaaggttaaacaatggccattaacagaagaaaaaataaaagcatta…
302659_2016_AE	cctcaaatcactctttggcaacgaccccttgtcacagtaaaaataggaggacaggtaaaagaagctctattagatacaggagcagatgatacagtattagaagatataaatttgccaggaaaatggaaaccaaaaatgatagggggaattggaggttttatcaaggtaaggcaatatgatcagatacttatagaaatttgtgggaaaaaggctataggtacagtgttagtaggacctacacctatcaacataattggacgaaatatgttgactcagcttggttgtactttaaatttcccaattagccctattgacactgtaccagtaaaattaaagccaggaatggatggaccaaaggttaaacagtggccattaacagaagaaaaaataaaagcctta…
302762_2016_AE	cctcaaatcactctttggcaacgaccccttgtcacagtaaaaataggaggacagctaaaagaagctctattagatacaggagcagatgatacagtattagaagatataaatttgccaggaaaatggaaaccaaaaatgatagggggaattggaggttttatcaaagtaaggcaatatgatcagatacttatagaaatttgtgggaaaaaagctataggtacagtgttagtaggacctacacctgtcaacataattggacgaaatatgttgactcagattggttgtactttaaatttcccaattagccrtattracrctgttccagtaacattaaagccaggaatggatggaccaaaggttaaacagtggccattaacagaagaaaaaataaaagcatta…
030817_2016_AE	~~~~~~~~~~~~~~~TGGCAACGACCCCTTGTCTCAATAAAAGTAGGAGGACAGATAAAAGAAGCTCTATTAGATACAGGAGCAGATGATACAGTATTAGAAGATATAAATTTGCCAGGAAAATGGAAACCAAAAATGATAGGGGGAATTGGAGGTTTTATCAAAGTAAGGCAATATGATCAGATATCTATAGAAATTTGTGGAAAAAAGGCCATAGGTACAGTGTTAGTAGGACCTACACCTATCAACATAATTGGACGAAATATGTTGACTCAGCTTGGTTGTACTTTAAATTTCCCAATTAGCCCTATTGACACTGTACCAGTAAAATTAAAGCCAGGAATGGATGGACCAAAGGTTAAACAGTGGCCATTAACAGAAGAAAAAATAAAAGCATTA…
031506_2016_AE	~~~~~~~~~~~~~~~TGGCAACGACCCCTTGTCACAATAAAAATAGGAGGACAGATGAGGGAAGCTCTATTAGATACAGGAGCAGATGATACAGTATTAGAAGATATAAATTTGCCAGGAAAATGGAAACCAAAAATGATAGGGGGAATTGGAGGTTTTATCAGGGTAAAGCAATATGATCAGATACTTATAGAAATTTGTGGAAAAAAGGCTATAGGTACAGTGTTAGTAGGACCTACACCTGTCAACATAATTGGACGAAACATGTTGACTCAGATTGGTTGTACTTTAAATTTCCCAATTAGCCCTATTGACACGGTACCAGTAAAATTAAAGCCAGGAATGGATGGACCAAAGGTTAAACAATGGCCATTAACAGAAGAAAAAATAAAAGCATTA…
031511_2016_AE	~~~~~~~~~~~~~~~TGGCAACGACCCCTTGTCACAATAAAAATAGCAGGACAGATAAAAGAAGCTCTATTAGATACAGGAGCAGATGATACAGTATTAGAAGATATAAATTTGCCCGGAAAATGGAAACCAAAAATGATAGGGGGAATTGGAGGTTTTATCAAGGTAAGGCAATATGATCAGATATCTATAGAAATTTGTGGAAAAAAGGCTATAGGTACAGTGTTAGTAGGACCTACACCTGTCAATATAATTGGACGTAACATGTTGACTCAGCTAGGTTGTACTTTAAATTTCCCAATTAGTCCTATTGACACTGTACCAGTAACATTAAAGCCAGGAATGGATGGACCAAAGGTTAAACAGTGGCCATTAACAGAAGAAAAAATAAAAGCATTA…
302619_2016_AE	cctcaaatcactctttggcaacgaccccttgtcacagtaaaaataggaggacagatgagagaagctctattagatacaggagcagatgatacagtattagaagagataaatttgccaggaaaatggaaaccaaaaatgatagggggaattggaggttttatcaaggtaaggcaatatgatcagatacttatagaaatttgtggaaaaaaggctataggtacagtgttagtaggacctacacctatcaacataattggacgaaatatgttgactcagcttggttgtactttaaatttcccaattagccctattgacactgtaccagtaacattaaagccaggaatggatggaccaaaggttaaacagtggccattaacagaagaaaaaataaaagcatta…
302616_2016_AE	cctcagatcactctttggcaacgaccccttgtcacagtgaaaataggaggacagataaaagaagctctattagatacaggagcagatgatacagtattagaagatataaatttgccaggaaaatggaaaccaaaaatgatagggggaattggaggttttatcaaagtaaggcaatatgatcagatacttatagaaatttgtggaaaaagggctataggtacagtgttagtaggacctacacctgtcaacataattggacgaaatatgttgactcagattggttgtactttaaatttcccaattagtcctattgacactgtaccagtaacattaaagccaggaatggatggaccaaaggttaaacagtggccattracagaagaaaaaataaaagcatta…
302595_2016_AE	cctcaaatcactcttcggcaacgaccccttgtcacagtaaaaataggaggacagatgaaagaagctctattagatacaggagcagatgatacagtattagaagacataaatttaccaggaaaatggaaaccaaaaatgatagggggaattggaggttttatcaaggtaaagcaatatgatcagatacttatagaaatttgtggaaaaagggctataggtacagtgttagtaggacctacacctgtcaacataattggacgaaatatgttgactcagattggttgtactttaaatttcccaattagccctattgacactgtaccagtagcattaaagccaggaatggatggaccaaaggttaaacagtggccattaacagaagaaaaaataaaagcatta…
302886_2016_AE	cctcaaatcactctttggcaacgacccattgtcgcagtaaaagtagaaggacagatgatagaagcwctattagatacaggagcagatgatacagtattagaagatataaatttgccaggaaaatggaaaccaaaaatgatagggggaattggaggttttatcaaggtaaggcaatatgatcagatacttatagaaatttgtggaaaaaaggctataggtacagtgttagtaggacctacacctgtcaacataattggacgaaatatgttgactcagattggttgtactttaaatctcccaattagccctattgacactgtaccagtaaaattaaagccaggaatggatggaccaaaggttaaacagtggccattaacagaagaaaaaataaaagcatta…
032113_2016_AE	~~~~~~~~~~~~~~~TGGCAACGACCCCTTGTCACAATAAAARTAGGAGGACAGATRARAGAAGCTCTATTAGATACAGGAGCAGATGATACAGTATTAGAAGATATAAATTTRCCAGGAAAATGGAAACCAAAAATGATAGGGGGAATTGGAGGTTTTATCAAGGTAAGACAATATGATCAGATACTTATAGAAATTTGTGGAAAAAAGGCYATAGGTACAGTGTTAGTAGGACCTACACCTATCAACATAATTGGACGAAATATGTTGACTCAGCTTGGTTGTACTTTAAATTTCCCAATTAGCCCTATTGACACTGTACCAGTAACATTAAARCCAGGAATGGATGGACCAAAGGTTAAACAGTGGCCATTAACAGAAGAAAAAATAAAAGCATTA…
302731_2016_AE	CCTCAAATCACTCTTTGGCAACGACCCCTTGTCACAATAAAAATAGAAGGACAGATAAAAGAAGCTCTATTAGATACAGGAGCAGATGATACAGTATTAAAAGATATAAATTTGCCAGGAAAATGGAAACCAAAAATGATAGGGGGAATTGGAGGTTTTATCAAGGTAAGGCAATATGATCAGATAGTTATAAAAATTTGTGGAAAAAGGGCTATAGGTACAGTGTTAGTAGGACCTACACCTGTCAACATAATTGGACGAAATATGTTGACTCAGATTGGTTGTACTTTAAATTTCCCAATTAGCCCTATTGACACTGTACCAGTAACATTAAAGCCAGGAATGGATGGACCAAAGGTTAAACAATGGCCATTAACAGAAGAAAAAATAAAAGCATTA…
302631_2016_AE	cctcaaatcactctttggcaacgaccccttgtcacagtaaaagtaggaggacaaatgagagaagctctattagatacaggagcagatgatacagtgttagaagatataaatttgccaggaaaatggaaaccaaaaatgatagggggaattggaggttttatcaaggtaaggcaatatgatcagatacttatagaaatttgtggaaaaaaggctataggtacagtgttagtaggacctacgcctatcaacataattggacgaaatatgttgactcagcttggttgtactttaaatttcccaattagccctattgacactgtaccagtaacattaaagccaggaatggatggaccaaaggttaaacagtggccattaacagaagaaaaaataaaagcatta…
302651_2016_AE	cctcaaatcactctttggcaacgaccccttgccacagtaaaaataggaggacagatgaaggaagctctattagatacaggagcagatgatacagtatttgaagatataaatttgccaggaaaatggaaaccaaaaatgatagggggaattggaggttttatcaaagtaaggcaatatgatcagatacttatagaaatttgtggaaaaagagctataggtacagtgttagtaggacctacacctatcaacataattggacgaaatatgttggctcagattggttgtactttaaatctcccaattagccctattgacactgtaccagtaacattaaagccaggaatggatgggccaaaggttaaacagtggccattaacagaagaaaaaataaaagcatta…
302646_2016_AE	cctcaaatcactctttggcaacgaccccttgtcacaataaaagtaggaggacaaataaaagaagctctattagatacaggagcagatgatacagtattagaagatataaatttgccaggaaaatggaaaccaaaaatgatagggggaattggaggttttatcaaagtaaggcaatatgatcagatacttatagaaatttgtgggaaaaaagctataggtacagtgttagtaggacctacacctgtcaacataattggacgaaatatgttgactcagcttggttgtactttaaatttcccaattagccctattgacactgtaccagtaacattaaagccaggaatggatggaccaaaggttaaacagtggccattaacagaagaaaaaataaaagcatta…
032931_2016_AE	~~~~~~~~~~~~~~~TGGCAACGACCCCTTGTCACAATAAAAATAGGAGGACAAATAAAAGAGGCTCTATTAGATACAGGAGCAGATGATACAGTATTAGAAGAAATAAATTTGCCAGGAAAATGGAAACCAAAAATGATAGGGGGAATTGGAGGTTTTATTAAGGTAAGGCAATATGAKCAGATAATGATAGAGATCTGTGGAAAAAAGGCTATAGGTACAGTGCTAGTAGGACCTACACCTRTCAACATAATTGGACGAAATATGTTGACTCAGCTTGGTTGTACTTTAAATTTCCCAATTAGCCCTATTGACACTGTACCAGTAAAATTAAAGCCAGGAATGGATGGACCAAAGGTTAAACAGTGGCCATTAACAGAAGAAAAAATAAAAGCATTA…
040502_2016_AE	~~~~~~~~~~~~~~~TGGCAACGACCCCTTGTCACAATAAAAGTRGGAGGACAGATGAAGGAAGCTCTATTAGATACAGGRGCAGATGATACAGTATTAGAAGATATAAATTTGCCAGGAAAATGGAAACCAAAAATGATAGGGGGAATTGGAGGTTTTATCAAGGTAAGGCAATATGATCAGATACTTATAGAAATTTGTGGAAAAAAGGCTGTAGGCTCAGTGTTAGTAGGRCCTACACCTGTCAAYATAATTGGACGAAATATRTTGACTCAGCTTGGTTGTACTTTAAATTTTCCAATTAGCCCTATTGACACTGTACCAGTAAAATTAAAGCCAGGAATGGATGGACCAAAGGTTAAACAGTGGCCATTAACAGAAGAAAAAATAAAAGCATTA…
040509_2016_AE	~~~~~~~~~~~~~~~TGGCAACGACCCCTTGTCACAGTAAAAGTAGGAGGACAGATGAGAGAAGCTCTATTAGATACAGGAGCAGATGATACAGTATTAGAAGATATAAATTTGCCAGGAAAATGGAAACCAAAAATGATAGGGGGAATTGGAGGTTTTATCAGGGTAAAGCAATATGATCAGATACTTATAGAAATTTRTGGAAAAAGGGCTATAGGTACAGTGTTAGTAGGACCTACACCTGTCAATATAATTGGACGAAATATATTGACTCAGCTTGGTTGTACTTTAAATTTCCCAATTAGCCCTATTGACACTGTACCAGTAACATTAAAGCCAGGAATGGATGGACCAAAGGTTAAACAGTGGCCATTAACAGAAGAAAAAATAAAAGCATTA…
041205_2016_AE	~~~~~~~~~~~~~~~TGGCAACGACCCCTTGTCACAATAAAAGTAGGAGGACAGATAAAAGAAGCTCTATTAGATACAGGAGCAGATGATACAGTATTAGAAGATATAAATTTGCCAGGAAAATGGAAGCCAAAAATGATAGGGGGAATTGGAGGTTTTATCAAGGTAAAGCAATATGAGCAGATACTTATAGAAATTTGTGGAAAAAAGGCTATAGGTACAGTGTTAGTAGGRCCTACRCCTATCAACATAATTGGACGAAATATGTTGACTCAGCTTGGTTGTACTTTAAATTTCCCAATTAGCCCTATTGACACTGTACCAGTAAAATTAAAACCAGGAATGGATGGACCAAAGGTTAAACAGTGGCCATTAACAGAAGAAAAAATAAAAGCAYTA…
041206_2016_AE	~~~~~~~~~~~~~~~TGGCAACGACCCATTGTCACAGTAAAAATAGAAGGACAGATGAAAGAAGCTCTATTAGATACAGGAGCAGATGATACGGTATTAGAAGATATAAATTTGCCAGGAAAATGGAAACCAAAAATGATAGGGGGAATTGGAGGTTTTATCAAGGTAAGGCAATATGATCAGATAACTATAGARATTTGTGGAAAAAGGGCTATAGGTACAGTGTTAGTAGGACCTACACCTGTCAACATAATTGGACGAAATATGTTGACTCAGCTTGGTTGTACTTTAAATTTCCCAATTAGCCCTATTGACACTGTACCAGTAACATTAAAGCCAGGAATGGATGGACCAAAGGTTAAACAGTGGCCATTAACAGAAGAAAAAATAAAAGCATTA…
041207_2016_AE	~~~~~~~~~~~~~~~TGGCAACGACCCCTTGTCACAGTAAAAATAGGAGGACAGATGAAAGAAGCTCTATTAGATACAGGAGCAGATGATACAGTATTAGAAGACATAAATTTACCAGGAAAATGGAAACCAAAAATGATAGGGGGAATTGGAGGTTTTATCAAGGTAAGGCAATATGATCAGATACTTATAGAAATTTGTGGAAAAAAGRCTATAGGTACAGTGTTAGTAGGACCTACACCTGTCAACATAATTGGACGAAATATGTTGACTCAGATTGGTTGTACTTTAAATTTCCCAATYAGCCCTATTGACACTGTACCAGTAGCATTAAAGCCAGGAATGGATGGACCAAAGGTTAAACAGTGGCCATTAACAGAAGAAAAAATAAAAGCATTA…
041211_2016_AE	~~~~~~~~~~~~~~~TGGCAACGACCCCTTGTCACAATAAAAATAGCAGGACAAATGARAGAAGCTCTATTAGATACAGGAGCAGATGATACAGTATTAGAAGATATAAATTTGCCAGGAAAATGGAAACCAAAAATGATAGGGGGAATTGGAGGTTTTATCAAGGTAAGGCAATATGATCAGATACCTATAGAGATCTATGGAAAAAAGGCTATAGGTACAGTGTTAGTAGGACCTACACCTGTCAACATAATTGGACGAAATATGTTGACTCAGCTTGGGTGTACTTTAAATTTTCCAATTAGYCCTATTGACACTGTACCAGTAACATTAAAGCCAGGAATGGATGGACCAAAGGTTAAACAGTGGCCATTAACAGAAGAAAAAATAAAAGCATTA…
041222_2016_AE	~~~~~~~~~~~~~~~TGGCAACGACCCCTTGTCACAGTAAAARTAGGAGGACARATGAGAGAAGCTCTATTAGATACAGGAGCAGATGATACAGTATTAGAAGATATAAATTTGCCAGGAAAATGGAAACCAAGAATGATAGGGGGAATTGGAGGTTTTATCAARGTAAAGCAATATGATCAGATACCTATAGAGATTTGTGGAAAAAAGGCTATAGGTACAGTGTTAGTAGGACCTACACCTGTCAATATAATTGGACGAAATATGTTGACCCAGCTTGGTTGTACTTTAAATTTCCCAATTAGYCCTATTGACACTGTACCAGTAACACTAAAGCCAGGAATGGATGGACCAAAGGTCAAACAGTGGCCATTAACAGAAGAAAAAATAAAAGCATTA…
041225_2016_AE	~~~~~~~~~~~~~~~TGGCAACGACCCCTTGTCACARTAAAARTAGGAGGACAGATGAAAGAAGCTCTATTAGATACAGGAGCAGATGATACAGTATTAGAAGATATAAATTTGCCAGGAAAATGGAAACCAAAAATRATAGGGGGAATTGGAGGTTTTATCAAGGTAAAGCAATATGATCAGATACYTATAGAAATTTGTGGAAAAARGGCTATAGGTACAGTGTTAGTAGGACCTACACCTGTCAACATAATTGGAMGAAATATGTTGACTCAGCTTGGTTGTACTTTAAATTTCCCAATTAGYCCTATTGACACTGTACCAGTAACATTAAAGCCAGGGATGGATGGACCAAAGGTTAAACAGTGGCCATTAACAGAAGAAAAAATAAAAGCATTA…
041902_2016_AE	~~~~~~~~~~~~~~~TGGCAGCGACCCATTGTCGCAGTAAAAATAGAAGGACAGATGAAAGAAGCTCTATTAGATACAGGAGCAGATGATACAGTATTAGAAGATATAAATTTGCCAGGAAAATGGAAACCAAAAATGATAGGGGGAATTGGAGGTTTTATCAAGGTAAGGCAATATGATCARATACTTATAGAAATTTGTGGAAAAAAAGCTATAGGTACAGTGTTAGTAGGACCTACACCTGTCAACATAATTGGACGAAATATGTTGACTCAAATTGGTTGTACTTTRAATCTCCCAATTAGCCCTATTGACACTGTACCAGTAAAATTAAAGCCAGGAATGGATGGACCAAAGGTTAAACAGTGGCCATTAACAGAAGAAAAAATAAAAGCATTA…
041903_2016_AE	~~~~~~~~~~~~~~~TGGCAACGACCCCTTGTCACAGTAAAAATAGGAGGACAGMTGAAAGAAGCTCTATTAGATACAGGAGCAGATGATACAGTATTAGARGAYATAAATTTACCAGGAAAATGGAAACCAAAAATGATAGGGGGAATTGGAGGTTTTATCAARGTAAGGCAATATGATCAGATACTTATAGAAATTTGTGGAAAAAAGGCTRTAGGTACAGTGTTAGTAGGACCTACACCTGTCAACATAATTGGACGAAATATGTTGACTCAGATTGGTTGTACTTTAAATTTCCCAATTAGCCCTATTGACACTGTACCAGTAGCATTAAAGCCAGGAATGGATGGACCAAAGGTTAAACAGTGGCCATTAACAGAAGAAAAAATAAAAGCATTA…
041907_2016_AE	~~~~~~~~~~~~~~~TGGCAACGACCCCTTGTCACAATAAAAATAGCAGGACAGATGAAAGAAGCTCTATTAGATACAGGAGCAGATGATACAGTATTAGAAGATATAAATTTGCCAGGAAAATGGAAACCAAAAATGATAGGGGGAATTGGAGGTTTTATCAAGGTAAGGCAATATGATCAGATATCTATAGAAATTTGTGGAAAAMRGGCTACAGGTACAGTGTTARTAGGACCTACACCTGTCAACATAATTGGAAGAAATATGTTGACTCARCTTGGTTGTACTTTAAATTTCCCAATTAGCCCTATTGACACTGTACCAGTAACATTAAAGCCAGGAATGGATGGACCAAAGGTTAAACAGTGGCCATTAACAGAAGAAAAAATAAAAGCATTA…
041914_2016_AE	~~~~~~~~~~~~~~~TGGCAACGACCTGTTGTCACAGTAAAAATAGAAGGACAGATAAAAGAAGCTCTATTAGAYACAGGAGCAGATGATACAGTATTAGAAGATATAAATTTGCCAGGAAAATGGAAACCAAAAATGATAGGGGGAATTGGAGGTTTTATCAAGGTAAAGCAATATGATCAGATACTTATAGAAATTTGTGGAAAAArGGCTATAGGTACAGTGYTAGTAGGACCTACACCTGTCAACATAATTGGACGAAATATGTTGACTCAGATTGGTTGTACTTTAAATTTCCCAATTAGYCCTATTGAAACTGTACCAGTAAAATTAAAGCCAGGAATGGATGGACCAAAGGTTAAACARTGGCCATTAACAGAAGAAAAAATAAAAGCATTA…
041920_2016_AE	~~~~~~~~~~~~~~~TGGCAACGACCCCTTGTCACAATAAAAATAGCAGGACAGATGAGAGAAGCTCTATTAGATACAGGAGCAGATGATACAGTATTAGAAGATATAAATTTGCCAGGAAAATGGAAACCAAAAATGATAGGGGGAATTGGAGGTTTTATCAAGGTAAGGCAATATGATCARATACTTATAGAGATTTATGGAAAAAAGGCTATAGGTACAGTGTTAGTAGGACCTACACCTGTCAACATAATTGGACGAAATATGTTGACYCAGCTTGGGTGTACTTTAAATTTTCCAATTAGCCCTATTGACACTGTACCAGTAACATTAAAGCCAGGAATGGATGGACCAAAGGTTAAACARTGGCCATTAACAGAAGAAAAAATAAAAGCATTA…
042602_2016_AE	~~~~~~~~~~~~~~~TGGCAACGACCCCTTGTCACAGTAAAAATAGGAGGACAGATGAAAGAAGCTCTATTAGATACAGGAGCAGATGATACAGTRTTAGAAGATATAAATTTGCCAGGAAAATGGAAACCAAAAATGATAGGGGGAATTGGAGGTTTTATCAAAGTAAGRCAATATGATCAGATACTTATAGAAATTTGTGGAAAAAAGGCTATAGGTACAGTGTTAGTAGGRCCTACACCTRTCAACATAATTGGACGRAATATGTTGACTCAGATTGGTTGTACTTTAAATTTCCCAATTAGTCCTATTGACACTGTACCAGTAACATTAAAGCCAGGAATGGATGGACCAAAGGTTAAACAGTGGCCATTAACAGAAGAAAAAATAARAGCATTA…
042603_2016_AE	~~~~~~~~~~~~~~~TGGCAACGACCCCTTGTCACAGTAAAAATAGGAGGACAGATGAAAGAAGCTCTATTAGATACAGGAGCAGATGATACAGTATTAGAAGATATAAATCTGGCAGGAAAATGGAAACCAAAAATAATAGGGGGAATTGGRGGTTTTATCAAGGTAAAGCAATATGATCAGATACCTATAGAAATTTGTGGAAAAAAGGCTATAGGTACAGTATTAGTAGGACCTACACCTGTCAACATAATTGGACGAAATATGTTGACTCAGCTTGGTTGTACTTTAAATTTCCCAATTAGTCCTATTGACACTGTACCAGTAAAATTAAAGCCAGGGATGGATGGACCAAAGGTTAAACAGTGGCCATTAACAGAAGAAAAAATAAAAGCATTA…
042610_2016_AE	~~~~~~~~~~~~~~~TGGCAACGACCCCTTGTCACAATAAAARTAGGAGGACAGGTGAAAGAAGCTCTATTAGATACAGGAGCAGATGATACAGTATTAGAAGAKATAAATTTACCAGGAAAATGGAAACCAAAAATGATAGGGGGAATTGGAGGTTTTATCAAGGTAAGRCAATATGATCAGATACTTATAGAAATTTGTGGAAAAAAGGCTATAGGTACAGTGTTAGTAGGACCTACACCTGTCAACATAATTGGACGAAACATGTTGACTCAGCTTGGTTGTACTTTAAATTTCCCAATTAGCCCTATTGACACTGTACCAGTAAAATTAAAGCCAGGAATGGATGGACCAAAGGTTAAACAGTGGCCATTAACAGAAGAAAAAATAAAAGCATTA…
042613_2016_AE	~~~~~~~~~~~~~~~TGGCAACGACCCCTTGTCACAATAAAAATAGGAGGACAGATGAAAGAAGCTCTATTAGATACAGGAGCAGATGATACAGTATTAGAAGATATAAATTTGCCAGGAAAATGGAAACCAAAAATGATAGGGGGAATTGGAGGTTTTATCAAGGTAAGGCAATATGATCAGATACTTATAGAAATTTGTGGGAAAAAAGCCATAGGTACAGTGTTAGTAGGACCTACACCTGTCAACATAATTGGACGAAATATGTTGACTCAGCTTGGTTGTACTTTAAATTTCCCAATTAGCCCTATTGACACTGTACCAGTAACATTAAAGCCAGGAATGGATGGACCAAAGGTTAAACAGTGGCCATTAACAGAAGAAAAAATAAAAGCATTA…
042622_2016_AE	~~~~~~~~~~~~~~~TGGCAACGACCCCTTGTCACAGTAAAAATAGGAGGACAGTTAAGAGAAGCTCTATTAGATACAGGAGCAGATGATACAGTATTAGAAGAAATAAATTTGCCAGGAARATGGAAACCAAAAATGATAGGGGGAATTGGAGGTTTTATCAAAGTAAGGCAATATGATCAGATAACTATAGATATTTGTGGAAAAAAGGCTATAGGTACAGTGTTAGTAGGACCTACACCTGTCAACATAATTGGACGAAATATGTTGACTCAGATTGGTTGTACTTTAAATTTCCCAATTAGCCCTATTGACACTGTACCAGTATCATTAAAGCCAGGAATGGATGGACCAAAGGTTAAACAGTGGCCATTAACAGAAGAAAAAATAAAAGCATTA…
302704_2016_AE	cctcaaatcactctttggcaacgaccccttgtygcagtaaaaataggaggacaggtgaaggaagctctattagatacaggagcagatgatacagtattagaagatataaatttgccaggaaaatggaaaccaaaaatgatagggggaattggaggttttatcaaggtaaggcaatatgatcagatagctatagaaatttgtgggaaaaaagctataggtacagtgttagtaggacctacacctgtcaacataattggacgaaatatgttgactcagrttggttgtactttaaatttcccaattagccctattgacactgtaccagtaacattaaagccaggaatggatggaccaaaggtyaaacagtggccattaacagaagaaaaaataaaagcatta…
042631_2016_AE	cctcaaatcactctttggcaacgaccccttgtcacagtaaaaataggaggacagatgagagaagctctattagatacaggagcagatgatacagtattagaagawatagatttgccaggaaaatggaaaccaaaaatgatagggggaattggaggttttattaaggtaaracaatatgatcagatacttatagaaatttgtggaaagaaggctataggtacagtrttagtaggacctacacctgtcaacataattggacgaaatatgttgactcagattggttgtactttaaatttcccawttagycctattgacactgtaccagtaaaattaaagccaggaatggatggaccaaargttaaacagtggccattaacagaagaaaaaataaaagcatta…
051006_2016_AE	~~~~~~~~~~~~~~~TGGCAACGACCCCTTGTCACAATAAAAATAGCAGGACAGATGAGAGAAGCTCTATTAGATACAGGAGCAGATGATACAGTATTAGAAGATATAAATTTGCCAGGAAAATGGAAACCAAAAATGATAGGGGGAATTGGAGGTTTTATCAAGGTAAAGCAATATGATCAGATACTTATAGAGATTTATGGAAAAAAGGCTATAGGTACAGTGTTAGTAGGACCTACACCTGTCAACATAATTGGACGAAATATGTTGACTCAGCTTGGGTGTACTTTAAATTTTCCAATTAGCCCTATTGACACTGTACCAGTAACAYTAAAGCCAGGGATGGATGGACCAAAGGTTAAACAGTGGCCATTRACAGAAGAAAAAATAAAAGCATTA…
051029_2016_AE	~~~~~~~~~~~~~~~TGGCAACGACCCCTTGTCTCAATAAAAGTAGGAGGACAGATAAAAGAAGCTCTATTAGATACAGGAGCAGATGATACAGTATTAGAAGATATAAATTTGCCAGGAAAATGGAAACCAAAAATGATAGGGGGAATTGGAGGTTTTATCAAGGTAAGGCAATATGATCAGATACTTATAGAAATTTGTGGGAAAAAGGCTATAGGTACAGTGTTAGTAGGACCTACACCTGTCAACATAATTGGACGAAATATGTTGACTCAGCTTGGTTGTACTTTAAATTTCCCAATTAGCCCTATTGACACTGTACCAGTAAAATTAAAGCCAGGAATGGATGGACCAAAGGTTAAACAGTGGCCATTAACAGAAGAAAAAATAAAAGCATTA…
051701_2016_AE	~~~~~~~~~~~~~~~TGGCAACGACCCCTTGTCACAGTAAAAATAGGAGGACAGATGAGAGAGGCTCTATTAGATACAGGAGCAGATGATACAGTATTAGAAGATATAAATTTGCCAGGAAAATGGAAACCAAAAATGATAGGGGGAATTGGAGGTTTTATCAAGGTAAGGCAATATGATCAGATACTTATAGAAATTTGTGGGAAAAAAGCTATAGGTACAGTGTTAGTAGGACCTACACCTATCAACATAATTGGACGAAATATGTTGGCTCAGATTGGTTGTACTATAAATYTCCCAATTAGCCCTATTGACACTGTACCAGTAACATTAAAGCCAGGAATGGATGGACCAAAGGTTAAACARTGGCCATTAACAGAAGAAAAAATAAAAGCATTA…
051705_2016_AE	~~~~~~~~~~~~~~~TGGCAACGACCCCTTGTCACAATAAAAATAGGAGGACAAATGAAAGARGCTCTATTAGATACAGGAGCAGATGATACAGTATTAGAAGATATAAATTTGCCAGGAAAATGGAAACCAAAAATGATAGGGGGAATTGGAGGTTTTATCAAAGTAAGGCAATATGATCAGRTAYYTATAGAAATTTGTGGAAAAAAGGCTATAGGTACAGTGTTAGTAGGACCTACACCTRTCAACATAATTGGACGRAATATGTTGACTCAGATTGGTTGTACTTTAAATTTCCCAATTAGCCCTATTGATACTGTACCAGTAAAATTAAAGCCAGGAATGGATGGACCAAGGGTTAAACAGTGGCCATTAACAGAAGAAAAAATAAAAGCATTA…
052406_2016_AE	~~~~~~~~~~~~~~~TGGCAACGACCCCTTGTYGCAATAARARTAGGAGGACAGATRAAAGAAGCTCTATTAGAYACAGGAGCAGATGATACAGTATTAGAAGATATAAATTTRCCAGGAAAATGGAAACCAAAAATGATAGGGGGAATTGGAGGTTTTATCAAGGTAAGGCAATATGATCAGATACTTATAGAAATTTGTGGAAAAAAGGCTATAGGTACAGTGTTAGTAGGACCTACACCTRTCAACATAATTGGRCGAAATATGTTGACTCAGCTTGGTTGTACTTTAAATTTCCCAATTAGYCCTATTGACACTGTACCAGTAAAATTAAAGCCAGGAATGGATGGACCAAAGGTTAAACAGTGGCCATTAACAGAAGAAAAAATAAAAGCATTA…
052409_2016_AE	~~~~~~~~~~~~~~~TGGCAACGACCCCTTGTCACAGTAAAAATAGGAGGACAGATRAAAGAAGCTCTATTAGATACAGGAGCAGATGATACAGTATTAGAAGATATAAATTTGCCAGGAAAATGGAAACCAAAAATGATAGGGGGAATTGGAGGTTTTATCAARGTAAGGCAATATGATCAGATACTTATAGAAATTTGTGGGAAAAAAGCTATAGGTACAGTGTTAGTGGGRCCTACACCTGTCAACATAATTGGACGAAATATGTTGACTCAGATTGGTTGTACTTTAAATTTCCCAATTAGCYMKATTGACACTGTACCAGTAAMATTAAAGCCAGGRATGGATGGRCCAAAGGTTAARCARTGGCCATTAACAGAAGAAAARATAAAAGCATTA…
302727_2016_AE	CCTCAAATCACTCTTTGGCAACGACCCCTTGTCACAGTAAAAATAGGAGGACAAATGAGAGAAGCTCTATTAGATACAGGAGCAGATGATACAGTATTAGAAGATATAACTTTGCCAGGAAAATGGAAACCAAAAATGATAGGGGGAATTGGAGGTTTTATCAAGGTAAAGCAATATGATCAGATACCTATAGAAATTTATGGAAAAAAGGCTATAGGTACAGTGTTAGTAGGACCTACACCTATCAACATAATTGGACGAAATATGTTGACTCAGCTTGGTTGTACTTTAAATTTCCCAATTAGCCCTATTGACACTGTACCAGTAAAATTAAAGCCAGGAATGGATGGACCAAAGGTTAAACAATGGCCATTAACAGAAGAAAAAATAAAGGCACTA…
302759_2016_AE	cctcaaatcactctttggcarcgacccattgtygcagtaaaaatagaaggacagatgaaagaagctctattagatacaggagcagatgatacagtattagaagatataaatttgccaggaaaatggaagccaaaaatgatagggggaattggaggttttatcaaggtaagacaatatgatcagatacttatagaaatttgtggaaaaaaggctataggtacagtgttagtaggacctacacctgtcaacataattggacgaaatatgttgactcagattggttgtactttaaatttcccaattagccctattgacactgtaccagtaaaattaaagccaggaatggatggaccaaaggttaaacagtggccattaacagaagaaaaaataaaagcatta…
053102_2016_AE	~~~~~~~~~~~~~~~TGGCAACGACCCCTTGTCACAATAAAAATAGGAGGACAGATAAAAGAAGCTCTGTTAGATACAGGAGCAGATGATACAGTATTAGAAGATATAAATTTGCCAGGAAAATGGAAACCAAAAATGATAGGGGGAATTGGAGGCTTTATCAAGGTAAGGCAATATGATCAGATAACTATAGAAATTTGTGGGAAAAAGGCTATAGGTACAGTGTTAGTAGGACCTACACCTATCAACATAATTGGACGAAATATGTTGACTCAGCTTGGTTGTACTTTAAATTTCCCAATTAGTCCTRTTGACACTGTACCAGTAAAATTAAAGCCAGGAATGGATGGACCAAAGGTTAAACAGTGGCCATTAACAGAAGAAAAAATAAAAGCATTA…
053108_2016_AE	~~~~~~~~~~~~~~~TGGCAACGACCCCTTGTCACAGTAAAAATAGGAGGACAGATGAGAGAAGCTCTATTAGATACAGGAGCAGATGATACAGTATTAGAAGATATARATTTGCCAGGAAAATGGAAACCAAAAATGATAGGGGGAATTGGAGGTTTTATCAAAGTAAGGCAATATGATCAGATAYCTATAGAAATTTGTGGGAAAAAGGCCATAGGTACAGTGTTAGTAGGACCTACACCTATCAACATAATTGGACGAAATATGTTGACTCAGCTTGGTTGTACTTTAAATTTCCCAATTAGCCCTATTGACACTGTACCAGTAACATTAAAGCCAGGTATGGATGGACCAAAGGTTAAACAGTGGCCATTAACAGAAGAAAAAATAAAAGCATTA…
053109_2016_AE	~~~~~~~~~~~~~~~TGGCAACGACCTCTTGTCYCAGTAAAAATAGAAGGACAGATGATAGAAGCTCTATTAGATACAGGAGCAGATGATACAGTATTAGAAGATATAAATTTGCCAGGAAAATGGAAACCAAAAATGATAGGGGGAATTGGAGGTTTTATCAAAGTAAGGCAATATGAGCAGATACTTATAGAAATTTGTGGAAAAAGGGCTGTAGGTACAGTRTTAGTAGGACCTACACCTGTCAACATCATTGGACGAAATATGTTGACTCAGATTGGTTGTACTTTAAWTTTCCCAATTAGTCCCATTGACACTGTACCAGTAAAATTAAAACCAGGAATGGATGGACCAAAGGTTAAACAGTGGCCATTAACAGAAGAAAAAATAAAAGCATTA…
053113_2016_AE	~~~~~~~~~~~~~~~TGGCAACGACCCCTTGTCACAGTAAAAATAGGAGGACAGGTRAAAGAAGCTCTATTAGATACAGGAGCAGATGATACAGTATTTGAARATATAAATTTGCCAGRAAAATGGAAACCAAAAATGATAGGGGGAATTGGAGGTTTTATCAAGGTAAAGCAATATGAKGAGATACTTATAGAAATTTGTGRAAAAAAGGCTATAGGTACAGTGTTAGTAGGACCTACACCTGTCAACATAATTGGACGAAATATGTTGACTCAGGTTGGTTGTACTTTAAATTTCCCAATTAGCCCTATTGACACTGTACCAGTAAMATTAAAGCCAGGAATGGATGGACCAAAGGTTAAACAGTGGCCATTAACARAAGAAAAAATAAAAGCATTA…
060703_2016_AE	~~~~~~~~~~~~~~~TGGCAACGACCCCTTGTCACARTAAAAATAGGAGGACAGATGAGAGAAGCTCTATTAGATACAGGAGCAGATGATACAGTATTAGAAGATATAAATTTGCCAGGAAAATGGAAACCAAAAATGATAGGGGGAATTGGAGGTTTTATCAAAGTAAGGCAATATGATCAGATACCTATAGAAATTTGTGGGAAAAAGGCCATAGGTACAGTGTTAGTAGGACCTACACCTATCAACATAATTGGACGAAATATGTTGACTCAGCTTGGTTGTACTTTAAATTTCCCAATTAGCCCTATTGACACTGTACCAGTAACATTAAAGCCAGGTATGGATGGACCAAAGGTTAAACAGTGGCCATTAACAGAAGAAAAAATAAAAGCATTA…
060709_2016_AE	~~~~~~~~~~~~~~~TGGCAACGACCTCTTGTCACAGTAAAAATAGRAGGACAGCTGAAAGAAGCTCTATTAGATACAGGAGCAGATGATACAGTATTAGAAGATATAAATTTGCCAGGAAAATGGAAACCAAAAAYGATAGGGGGAATTGGAGGTTTTATCAAAGTAAGGCAATATGATCAGATACTTATAGAAATTTGTGGAAAAAAGGCCATMGGTACAGTRTTAGTAGGACCTACACCTRTCAAYATAATTGGGCGAAATATGTTGACTCAGCTTGGTTGTACTTTAAATTTCCCAATTAGTCCTATTGACACTGTRCCAGTAACATTAAAACCAGGAATGGATGGACCAAAAGTTAAACAGTGGCCATTAACAGAAGAAAAAATAAAAGCATTA…
060720_2016_AE	~~~~~~~~~~~~~~~TGGCAACGACCCCTTGTCACAATAARAGTAGGAGGACAGATGAGAGAAGCTCTATTAGATACAGGAGCAGATGATACAGTATTAGAAGATATAAATTTGCCAGGAAAATGGAAACCAAAAATGATAGGGGGAATTGGAGGTTTTATCAAGGTAAGGCAATATGATCAGATACTTATAGAAATTTGTGGAAARAGGGCTATAGGTACAGTGCTAGTAGGACCTACACCTGTCAACATAATTGGACGAAATATGTTGACTCAGCTTGGTTGTACTTTAAATTTCCCAATTAGTCCTATTGACACTGTACCAGTAACATTAAAACCAGGAATGGATGGACCAAAAGTTAAACAGTGGCCATTAACAGAAGAAAAAATAAAAGCATTA…
060722_2016_AE	~~~~~~~~~~~~~~~TGGCAACGACCCCTTGTCACAATAAAAGTAGGAGGACAAATGAGAGAAGCTCTATTAGATACAGGAGCAGATGATACAGTATTAGAAGATATAAATTTACCAGGAAAATGGAAACCAAAAATGATAGGGGGAATTGGAGGTTTTATCAAGGTAAAGCAATATGATCAGATAYYTATAGAAATTTGTGGAAAAAGGGCTATAGGTACAGTGTTAGTAGGACCCACACCTATCAACATAATTGGACGAAATATGTTGACTCAGATTGGTTGTACTTTAAATTTCCCAATTAGCCCTATTGACACTGTACCAGTAACATTAAAGCCAGGAATGGATGGACCAAAGGTTAAACAGTGGCCATTAACAGAAGAAAAAATAAAGGCACTA…
302756_2016_AE	cctcaaatcactctttggcaacgaccccttgtcacagtaaaaataggaggacagatgaaagaagctctattagatacaggagcagatgatacagtattagaagatataaatttgccaggaaaatggaaaccaaaaatgatagggggaattggaggttttatcaaggtaagacaatatgatcaggtaatgatggaaatttgtggaaaaaaggctataggtacagtgttagtaggacctacacctgtcaacataattggacgaaatatgttgactcagattggttgtactttaaatttcccaattagccctattgacactgtaccagtaacattaaagccaggaatggatggaccaaaagttaaacagtggccattaacagaagaaaaaataaaagcatta…
060725_2016_AE	~~~~~~~~~~~~~~~TGGCAACGACCCCTTGTCACAGTAAAAGTAGGAGGACAGATGAGAGAAGCTCTATTAGATACAGGAGCAGATGATACAGTATTAGAAGAWATAAATTTGCCAGGAAAATGGAAACCAAAAATGATAGGGGGAATTGGAGGTTTTATCAAGGTAAGGCAATATGATCAGATACTTATAGAAATTTGTGGAAAAAAGGCTATAGGTACAGTGTTAGTAGGACCTACACCTATCAACATAATTGGACGAAATATGTTGACTCAGCTTGGTTGTACTTTAAATTTCCCAATTAGCCCTATTGACACTGTACCAGTAACATTAAAGCCAGGAATGGATGGACCAAAGGTTAAACAGTGGCCATTAACAGAAGAAAAAATAAAAGCATTA…
061401_2016_AE	~~~~~~~~~~~~~~~TGGCAACGACCCCTTGTCTCAGTAAAAATAGGAGGACAGATAAAAGAAGCTCTATTAGATACAGGAGCAGATGATACAGTATTAGAAGATATAAATTTGCCAGGAAAATGGAAACCAAAAATGATAGGGGGAATTGGAGGTTTTATYAAAGTAAGGCAATATGATCAGATACTTATAGAAATTTGTGGAAAAAAGGCTATAGGTACAGTGTTAGTAGGACCTACACCTGTCAACATAATTGGACGAAATATGTTGACTCAGATTGGTTGTACTTTAAATTTCCCAATTAGCCCTATTGACACTGTACCAGTAAAATTAAAGCCAGGAATGGATGGACCAAAGGTTAAACAATGGCCATTAACAGAAGAAAAAATAAAAGCATTA…
061425_2016_AE	~~~~~~~~~~~~~~~TGGCAACGACCCCTTGTCACAGTAAAGATAGGAGGACAGATGAAAGAAGCTCTGTTAGATACAGGAGCAGATGATACAGTATTAGAAGATATAAATTTGCCAGGAAAATGGAAACCAAAAATGATAGGGGGAATTGGAGGTTTTATCAAAGTAAGACAATATGATCAGATACYTATAGAAATTTGTGGRAAAAAAGCTATAGGTACAGTGTTAGTAGGACCYACACCTGTYAACATAATTGGACGAAATATGTTGACTCAGATTGGTTGTACTTTAAATTTCCCAATTAGCCCTATTGACACTGTACCAGTAACATTAAAGCCAGGAATGGATGGGCCAAAGGTTAAACAGTGGCCATTAACAGAAGAAAAGATAAAAGCATTA…
062104_2016_AE	~~~~~~~~~~~~~~~TGGCAACGACCCCTTGTCGCAATAAAAATAGGAGGACAGATGAAAGAAGCTCTATTAGATACAGGAGCAGATGATACAGTATTAGAAGATATAAATTTGCCAGGAAAATGGAAACCAAAAATGATAGGGGGAATTGGAGGTTTTATCAAAGTAAAGCAATATGATCAGATACTTATAGAAATTTGTGGAAAAAGGGCYATAGGTACAGTGTTGGTAGGACCTACRCCTATCAACATAATTGGACGAAATATGTTGACTCAGATTGGTTGTACTTTAAATTTCCCAATTAGCCCTATTGACACTGTACCAGTAAAATTAAARCCAGGAATGGATGGACCAAAGGTTAAACAGTGGCCATTAACAGAAGAAAAAATAAAAGCATTA…
062111_2016_AE	~~~~~~~~~~~~~~~TGGCARCGACCCCTTGTCACAATAAAAATAGARGGACAGCTAAGAGAAGCTCTATTAGATACAGGAGCAGATGATACAGTATTAGAAGATATAAATTTGCCAGGAAAATGGAARCCAAAAATGATAGGGGGAATTGGAGGTTTTATAAAGGTAAAGCAATATGATCAGATACTTATAGAAATTTGTGGAAAAARGGCTATAGGTACAGTGTTAGTAGGACCTACACCTATCAACATAATTGGACGAAATATGTTGACTCAGCTTGGTTGTACTTTAAATTTCCCAATTAGTCCTATTGACACTGTACCAGTAAAATTAAAGCCAGGAATGGATGGACCAAAGGTTAAACAGTGGCCATTAACAGAAGAAAAAATAAAAGCATTA…
062115_2016_AE	~~~~~~~~~~~~~~~TGGCAACGACCCCTTGTCTCAATAAAAGTAGGAGGACAGATAARAGAAGCTCTATTAGATACAGGAGCAGATGATACAGTATTAGAAGATATAAATTTGCCAGGAAAATGGAAACCAAAAATGATAGGGGGAATTGGAGGTTTTATCAARGTAAGGCAATATGATCAGATAYCTATAGAAATTTGTGGAAAAAAGGCCATAGGTACAGTGTTAGTAGGACCTACACCTATCAACATAATTGGACGAAATATGTTGACTCAGCTTGGTTGTACTTTAAATTTCCCAATTAGCCCTATTGACACTGTACCAGTAAAATTAAAGCCAGGAATGGATGGACCAAAGGTTAAACAGTGGCCATTAACAGAAGAAAAAATAAAAGCATTA…
062118_2016_AE	~~~~~~~~~~~~~~~TGGCAACGACCCCTTGTCACAGTAAAAATAGGAGGACAGATAAAAGAAGCTCTATTAGATACAGGAGCAGATGATACAGTATTAGAAGATATAAATTTGCCAGGAAAATGGAAGCCRAAAATGATAGGGGGAATTGGAGGTTTTATCAAGGTAAGGCAATATGATCAGATACCCATAGAAATTTGTGGAAAAAGGGCTATAGGTACAGTGTTAATAGGACCTACACCTGTCAACATAATTGGACGAAATATATTGACTCAGATTGGTTGTACTTTAAATTTCCCAATTAGCCCTATTGACACTGTACCAGTAAAATTAAAGCCAGGAATGGATGGACCAAAGGTTAAACAGTGGCCATTAACAGAAGAAAAAATAAAAGCATTA…
062803_2016_AE	~~~~~~~~~~~~~~~TGGCAACGACCCCTTGTCACAATAAAAGTAGGAGGRCAGATGAAAGAAGCTCTATTAGATACAGGAGCAGATGATACAGTATTAGAAGATATAAATTTGCCAGGAAAATGGAAACCAAAAATGATAGGGGGAATTGGAGGTTTTATCAAAGTAAGGCAATATGATCAGATACTTATAGAAATTTGTGGGAAAAAGGCTATAGGTACAGTGTTAGTAGGACCTACACCTGTCAACATAATTGGACGAAAYATGTTGACTCAGCTTGGTTGTACTTTAAATTTCCCAATTAGCCCTATTGACACTGTRCCAGTAAAATTAAAGCCAGGAATGGATGGAYCAAAGGTTAAACAGTGGCCATTAACAGAAGAAAAAATAAAAGCATTA…
062804_2016_AE	~~~~~~~~~~~~~~~TGGCAACGACCCCTTGTCACAATAAAAGTAGGAGGACAGATAAAGGAAGCTCTATTAGATACAGGAGCAGATGATACAGTATTAGAAGATATAARTTTACCAGGAAAATGGAAACCAAAAATGATAGGGGGAATTGGAGGTTTTATCAAGGTAAGGCAATATGATCAGATACTTATAGAAATTTGTGGAAAAAAGGCTGTAGGCTCAGTGTTAGTAGGACCTACACCTGTCAACATAATTGGACGAAATATGTTGACTCAGCTTGGTTGTACTTTAAATTTTCCAATTAGCCCTATTGACACTGTACCAGTARCATTAAAGCCAGGAATGGATGGACCAAARGTAAAACAGTGGCCATTAACAGAAGAAAAAATAAAAGCATTA…
062805_2016_AE	~~~~~~~~~~~~~~~TGGCAACGACCCCTTGTCACAATAAAAGTAGGAGGACAGATAAAGGAAGCTCTATTAGATACAGGAGCAGATGATACAGTATTAGAAGATATAAATTTACCAGGAAAATGGAAACCAAAAATGATAGGGGGAATTGGAGGTTTTATCAAGGTAAGGCAATATGATCAGATACTTATAGAAATTTGTGGAAAAAAGGCTGTAGGCTCAGTGTTAGTAGGACCTACACCTGTCAACATAATTGGACGAAATATGTTGACTCAGCTTGGTTGTACTTTAAATTTTCCAATTAGCCCTATTGACACTGTACCAGTAACATTAAAGCCAGGAATGGATGGACCAAAGGTAAAACAGTGGCCATTAACAGAAGAAAAAATAAAAGCATTA…
062806_2016_AE	~~~~~~~~~~~~~~~TGGCAACGACCCCTTGTCCCAATAAAAATAGGAGGACAGATGAGAGAAGCTCTATTAGATACAGGAGCAGATGATACAGTATTAGAAGATATAAATTTGCCAGGAAAATGGAAACCAAAAATGATAGGGGGAATTGGAGGTTTTATCAAGGTAAAGCAATATGATCAGATACTTATAGAAATTTGTGGAAAAAAGGCTATCGGTACAGTGTTAGTAGGACCTACACCTATCAACATAATTGGACGAAATATGTTGACTCAGCTTGGATGTACTTTAAATTTCCCAATCAGCCCTATTGACACTGTACCAGTAACATTAAAGCCAGGAATGGATGGACCAAAGGTTAAACAGTGGCCATTAACAGAAGAAAAAATAAAAGCATTA…
062819_2016_AE	~~~~~~~~~~~~~~~TGGCAACGACCCCTTGTCACAATAAAAGTAGAAGGACAGATGAGAGAAGCTCTGTTAGATACAGGAGCAGATGATACAGTATTAGAAGATATAAAYTTGCCAGGAAAATGGAAACCAAAAATGATAGGGGGAATTGGAGGTTTTATCAAGGTAAGGCAATATGATCAGATACTTATAGAAATTTGTGGAAAAAAGGCTATAGGTACAGTGTTAGTAGGACCTACACCTGTCAACATAATTGGACGAAATATGTTGACTCAGCTTGGTTGTACTTTAAATTTYCCAATTAGCCCTATTGAYACTGTACCAGTAAAATTAAAGCCAGGAATGGATGGACCAAARGTTAAACAGTGGCCATTAACAGAAGAAAAAATAAAAGCATTA…
062823_2016_AE	~~~~~~~~~~~~~~~TGGCAACGACCCCTTGTCACAGTAAAAGTAGRAGGACAGMTAAAAGAAGCTCTATTAGATACAGGAGCAGATGATACAGTATTAGAAGATATAAATTTGCCAGGAAAATGGAAACCAAAAATGATAGGGGGAATTGGAGGTTTTATCAAGGTAAGGCAATATGATCAGATACTTATAGAAATTTGTGGAAAAAAGGCTATAGGTACAGTATTAGTAGGACCTACACCTGTCAACATAATTGGACGAAATATGTTGACTCAGATTGGTTGTACTTTAAATTTCCCAATTAGCCCTATTGACACTGTACCAGTAACATTAAAGCCAGGAATGGATGGACCAAAGGTTAAACAGTGGCCATTAACAGAAGAAAAAATAAAAGCATTA…
070501_2016_AE	~~~~~~~~~~~~~~~TGGCAACGACCCmTTGTCACAGTAAAAATAGCAGGACAGATGAAAGAAGCTCTGTTAGACACAGGAGCAGATGATACAGTATTAGAAGATATAAATTTGCCAGGAAAATGGARACCAAAAATGATAGGGGGAATTGGAGGTTTTATCAAAGTAAGGCAATATGATCAGATACTTATAGAAATTTGTGGAAAACAGGCTATAGGGACAGTGTTAGTRGGACCTACACCTGTCAACATAATTGGACGAAATATGTTGACTCAGATTGGTTGTACTTTAAATTTCCCAATTAGTCCCATTGACACTGTACCAGTAACATTAAAGCCAGGAATGGATGGACCAAAGGTTAAACAGTGGCCATTAACAGAAGAAAAAATAAAAGCATTA…
070504_2016_AE	~~~~~~~~~~~~~~~TGGCAACGACCCCTTGTCACAATAAAAATAGgAGGACAGATAAAAGAAGCTCTATTAGATACAGGAGCAGATGATACAGTATTAGAAGATATAAATTTGCCAGGAAAATGGAAACCAAAAATGATAGGGGGAATTGGAGGTTTTATCAAGGTAAGGCAATATGATCAGATAACTATAGAAATTTGTGGGAAAAAGGCTATAGGTACAGTGTTAGTAGGWCCTACACCTATCAACATAATTGGACGAAATATGTTGACTCARCTTGGTTGTACTTTAAATTTCCCAATTAGYCCTATTGACACTGTACCAGTAAAATTAAARCCAGGAATGGATGGACCAAAGGTTAAACAGTGGCCATTAACAGAAGAAAAAATAAAAGCATTA…
070506_2016_AE	~~~~~~~~~~~~~~~TGGCAACGACCCCTTGTCACAGTAAAAATAGAAGGACAGATAAAAGAAGCTCTATTAGATACAGGAGCAGATGATACAGTATTAGAAGATATAAATTTGACAGGAAAATGGAAACCAAAAATGATAGGGGGAATTGGAGGTTTTATCAAAGTAAGGCAATATGATCAGATACTTATAGAAATTTGTGGAAAAAGGGCTATAGGTACAGTGTTAGTAGGACCTACACCTGTCAACATCATTGGACGAAATATGTTGACTCAGATTGGTTGTACTTTAAATTTYCCAATTAGCCCTATTGACACTGTACCAGTAAAATTAAARCCAGGTATGGATGGACCMAARGTTAAACAATGGCCATTAACAGAAGAAAAAATAAAAGCATTA…
070518_2016_AE	~~~~~~~~~~~~~~~TGGCAACGACCCCTTGTCACAGTAAAAATAGGAGGACAGGTGAAAGAAGCTCTATTAGACACAGGGGCAGATGATACAGTATTAGAAGATATAAATTTGCCAGGAAAATGGAAACCAAAAATGATAGGGGGAATTGGAGGTTTTATCAAGGTAAAGCAATATGATCAGATACTTATAGAAATTTGTGGAAAAAAGGCTATAGGTACAGTGTTAGTAGGACCTACACCTGTCAACATAATTGGACGAAATATGTTGACTCAGATTGGTTGTACTTTAAATTTTCCAATTAGTCCTATTGACACTGTACCAGTAAAATTAAAGCCAGGAATGGATGGACCAAAAGTTAAACAGTGGCCATTAACAGAAGAAAAAATAAAAGCATTA…
070519_2016_AE	~~~~~~~~~~~~~~~TGGCAACGACCCCTTGTCACAGTAAAAGTAGGAGGACAGATGAAAGAAGCTCTATTAGATACAGGAGCAGATGATACAGTATTAGAAGATATAAATTTGCCAGGAAAATGGAAACCAAAAATGATAGGGGGAATTGGAGGCTTTATCAAAGTAAGGCAATAYGATCAGATACTTATAGAAATTTGTGGAAAAAAGGCTATAGGTACAGTGTTAGTAGGACCTACACCTGTCAACATAATTGGACGAAATATGTTGACTCAGCTTGGTTGTACTTTAAATTTCCCAATTAGTCCTATTGACACTGTACCAGTAACATTAAAGCCAGGAATGGATGGACCAAAAGTTAAACAATGGCCATTAACAGAAGAAAAAATAAAAGCATTA…
071201_2016_AE	~~~~~~~~~~~~~~~TGGCAGCGACCCCTTGTCACAGTAAAAATAGRAGGACAGACAAAAGAAGCTCTATTAGATACAGGAGCAGATGATACAGTATTAGAAGATATAAATTTGCCAGGAAAATGGAAACCAAGAATGATAGGGGGAATTGGAGGTTTTATCAAAGTAAGGCAATATGATCAGATACTTATAGAAATTTGTGGAAAAAAGGCTATAGGTACAGTGTTAGTAGGACCTACACCTGTCAACATAATTGGACGAAATATGTTGACTCAGATTGGTTGTACTTTAAATTTCCCAATTAGCCCTRTTGACMCTGTACCAGTARAATTAAAGCCAGGAATGGATGGACCAAAGGTTAAACAATGGCCATTAACAGAAGAAAAAATAAAAGCATTA…
302806_2016_AE	cctcaaatcactctttggcaacgaccccttgtcacagtaaaagtaggaggacaaatgagagaagctttattagatacaggagcagatgataccgtattagaagatataaatttgccaggaaaatggaaaccaaaaatgatagggggaattggaggttttatcaaagtaaagcaatatgatcagatacttatagaaatttgtggaaaaaaggctataggtacagtgttagtaggacctacacctatcaacataattggacgaaatatgttgactcagcttggttgtactttaaatttcccaattagccctattgacactgtaccagtaacattaaagccaggaatggatggaccaaaggttaaacagtggccattaacagaagaaaaaataaaagcatta…
071213_2016_AE	~~~~~~~~~~~~~~~TGGCAGCGACCCCTTGTTGCAATAAAAGTAGGAGGACAGGTGAGAGAAGCTCTATTAGATACAGGAGCAGATGATACAGTATTAGAAGATATAAATTTGTCAGGAAAATGGAAACCAAAAATGATAGGGGGAATTGGAGGTTTTATCAAGGTAAGACAATATGATCAGATAACTATAGAAATTTGTGGAAAAAAGGCTATAGGTACAGTGTTAGTAGGACCTACACCTATCAACATAATTGGACGAAATATGTTGACTCAGCTTGGTTGTACTTTAAATTTCCCAATTAGCCCTATTGACACTGTACCAGTAACATTAAAGCCAGGAATGGATGGACCAAAGGTTAAACAATGGCCATTAACAGCAGAAAAAATACAAGCATTA…
071216_2016_AE	~~~~~~~~~~~~~~~TGGCAGCGACCCCTTGTCACAGTAAAAATAGGAGGACARATRAAAGAAGCTCTATTAGATACAGGAGCAGATGATACAGTATTAGAAGATATAAATTTGCCAGGAAAATGGAAACCAAAAATGATAGGGGGAATTGGAGGTTTTATCAAGGTAAAGCAATATGATCAGATACTTATAGAAATTTGTGGAAAAARGGCTATAGGTACAGTGTTAGTAGGACCTACACCTATCAACATAATTGGACGAAATATGTTGACTCAGATTGGTTGTACTTTAAATTTCCCAATTAGCCCTATTGACACTGTACCAGTAACATTAAARCCAGGRATGGATGGACCAAAAGTTAAACAGTGGCCATTAACAGAAGAAAAAATAAAGGCACTA…
071217_2016_AE	~~~~~~~~~~~~~~~TGGCAACGACCTGTTGTCACAGTAAAAATAGAAGGACAGATAAAAGAAGCTCTATTAGACACAGGAGCAGATGATACAGTATTAGAAGATATAAATTTGCCAGGAAAATGGAAACCAAAAATGATAGGGGGAATTGGAGGYTTTATCAAGGTAAAACAATATGATCAGATACTTATAGAAATTTGTGGAAAAAGGGCTATAGGTACAGTGTTAGTAGGACCTACACCTGTCAACATAATTGGACGAAATATGTTGACTCAGATTGGTTGTACTTTAAATTTCCCAATTAGTCCTATTGAAACTGTACCAGTAAAATTAAAGCCAGGAATGGATGGACCAAAGGTTAAACAGTGGCCATTAACAGAAGAAAAAATAAAAGCATTA…
071802_2016_AE	~~~~~~~~~~~~~~~TGGCAACGACCCCTTGTCACAATAAAAATAGGAGGACAGATAAAAGAAGCTCTATTAGATACAGGAGCAGATGATACAGTATTAGAAGATATAAATTTGCCAGGAAAATGGAAACCAAAAATAATAGGGGGAATTGGAGGTTTTATCAAGGTAAAGCAATATGATCAGATACTTATAGAAATTTGTGGAAAAAAGGCTATAGGTACAGTATTAGTAGGACCTACACCTGTYAACATAATTGGACGAAATATGTTGACTcAGCTTGGTTGTACTTTAAATTTCCCAATTAGCCCCATTGATACTGTACCAGTAAAATTAAAACCAGGGATGGATGGACCAAAGGTTAAACAGTGGCCGTTAACAGAAGAAAAAATAAAAGCATTA…
071804_2016_AE	~~~~~~~~~~~~~~~TGGCAACGACCCCTTGTCACAGTAAAAGTAGGAGGACAGATAAAAGAAGCTCTATTAGATACAGGAGCAGATGATACAGTATTAGAAGATATAAATTTGCCAGGAAAATGGAAACCAAAAATGATAGGGGGAATTGGAGGTTTTATCAAGGTAAGGCAATATGATCAGATACCTATAGAGATCTGTGGAAAAAGGGCTATAGGTACAGTGTTAGTAGGACCCACACCTGTCAACATAATTGGACGAAATATGTTGACTCAGATTGGTTGTACTTTAAATTTCCCAATTAGCCCTATTAACACTGTACCAGTAAGATTAAAGCCAGGAATGGATGGACCAAAGGTTAAACAGTGGCCATTAACAGAAGAAAAAATAAAAGCATTA…
071812_2016_AE	~~~~~~~~~~~~~~~TGGCAACGACCCCTTGTCTCAATAAAAATAGGAGGACAGATAAAAGAAGCTCTATTAGACACAGGAGCAGATGATACAGTATTAGAAGATATAAATTTGCCAGGAAAATGGAAACCAAAAATGATAGGGGGAATTGGAGGTTTTATCAAGGTAAGGCAATATGATCAGATAATGATAGAGATTTGTGGAAARAAGGCYATAGGTACAGTGTTAGTAGGACCTACACCTATCAACATAATTGGACGAAATATGTTGACTCAGCTTGGTTGTACTTTAAATTTCCCAATTAGCCCTATTGACACTGTACCAGTAAAATTAAAGCCAGGAATGGATGGACCAAARGTTAAACAGTGGCCATTAACAGAAGAAAAAATAAAAGCATTA…
071816_2016_AE	~~~~~~~~~~~~~~~TGGCAACGACCCCTTGTCTCAATAAAAATAGGAGGACAGATAAAAGAAGCTCTATTAGATACAGGRGCAGATGATACAGTATTAGAAGATATAAATTTGCCAGGAAAATGGAAACCAAAAATGATAGGGGGAATTGGAGGTTTTATCAAAGTAAGRCAATATGATCAGGTAdCTATAGAAATTTGTGGAAAAAAGGCTATMGGTACAGTGTTAGTAGGACCTACACCTATCAACATAATTGGACGAAATATGTTGACTCAGATTGGTTGTACTTTAAATTTCCCAATTAGYCCYATTGACACTGTACCAGTAAAATTAAAGCCAGGAATGGATGGACCAAAGGTTAAACAGTGGCCATTAACAGAAGARAAAATAAAAGCATTA…
071821_2016_AE	~~~~~~~~~~~~~~~TGGCAACGACCCCTTGTCACAGTRAAAATAGGAGGACAGATGAAAGAAGCTCTATTAGATACAGGAGCAGATGATACRGTATTAGAAGATATAAATTTGCCAGGAARATGGAAACCAAAAATGATAGGGGGAATTGGAGGTTTTATCAAAGTAAGGCAATATGATCAGATACTTATAGAAATTTGTGGAAAGAAGGCTATAGGTACAGTGTTAGTAGGACCCACACCTGTCAACATAATTGGACGAAATATGTTGACTCAGATTGGTTGTACTTTAAATTTCCCAATTAGCCCTATTGACACTGTACCAGTAACATTAAAGCCAGGAATGGATGGACCAAAGGTTAAACAGTGGCCATTAACAGAAGAAAAAATAAAAGCATTA…
071823_2016_AE	~~~~~~~~~~~~~~~TGGCAACGACCCCTTGTCACAGTAAAAGTAGGAGGACAGATGAGAGAAGCTCTATTAGATACAGGAGCAGATGATACAGTATTAGAAGATATAAATTTGCCAGGAAAATGGAAACCAAAAATGATAGGGGGAATTGGAGGTTTTATCAAAGTAAGGCAATATGATCAGATACTTATAGAAATTTGTGGAAAAAAGGCTATAGGTACAGTGTTAGTAGGACCTACACCTATCAACATAATTGGACGAAATATGTTGACTCAGCTTGGTTGTACTTTAAATTTCCCAATTAGCCCTATTGACACTGTACCAGTAACATTAAAGCCAGGAATGGATGGACCAAAGGTTAAACAGTGGCCATTAACTGAAGAAAAAATAAAAGCATTA…
072611_2016_AE	~~~~~~~~~~~~~~~TGGCAACGACCCCTTGTCACAGTAAAAATAGAAGGACAGATGAGAGARGCTCTATTAGATACAGGAGCAGATGATACAGTATTAGAAGAGATAAATTTGCCAGGAAAATGGAAACCAAAAATGATAGGGGGAATTGGAGGTTTTATCAAAGTAAGGCAATATGATCAGATACCTATAGAAATTTGTGGAAARAAGGCTAYAGGTACAGTGTTAGTAGGACCTACACCTGTCAACATAATTGGACGRAATATGTTGACTCAGCTTGGTTGTACTTTAAATTTCCCAATTAGCCCTATTGACACTGTACCAGTAACATTAAAGCCAGGAATGGATGGACCAAAGGTTAAACAGTGGCCATTAACAGAAGAAAAAATAAAAGCATTA…
072614_2016_AE	~~~~~~~~~~~~~~~TGGCAACGACCCCTTGTCACAGTAAAAATAGGAGGACAGATRAAAGAAGCTCTATTAGATACAGGAGCAGATGATACAGTATTAGAAGATATAAATTTGCCAGGAAAATGGAAACCAAAAATGATAGGGGGAATTGGAGGTTTTATCAAAGTAAGGCAATATGATSAGATACYTATAGAAATTTGTGGAAAAARGGCTATAGGTACAGTGTTAGTAGGACCTACACCTRTCAACATAATTGGACGAAATATGTTGACTCAGATTGGTTGTACTTTAAATTTCCCAATTAGTCCTATTGACACTGTACCAGTAACATTAAAGCCAGGAATGGATGGACCAAARGTTAAACAGTGGCCATTAACAGAAGAAAAAATAARAGCATTA…
072615_2016_AE	~~~~~~~~~~~~~~~TGGCAACGACCCCTTGTCACAGTAAAAGTAGGAGGACAGATRAAAGAAGCTCTATTAGATACAGGAGCAGATGATACAGTATTAGAAGAAATAAATTTRCCAGGAAAATGGAAACCAAAAATGATAGGGGGAATTGGAGGTTTTATCAAAGTAAGGCAATATGATCAGATACCTATAGAAATTTGTGGAAAAAAGGCTATAGGTACAGTGTTAGTAGGACCTACACCTGTCAACATAATTGGACGWAATATGTTGACTCARCTTGGTTGTACTTTAAATTTYCCAATTAGYCCTATTGACACTGTACCWGTAACATTAAAGCCAGGAATGGATGGACCAAARGTTAAACARTGGCCATTAACAGAAGAAAAAATAAAAGCATTA…
072618_2016_AE	~~~~~~~~~~~~~~~TGGCAACGACCCCTTGTCACAGTAAAAATAGGAGGACAAATGAGAGAAGCTCTATTAGATACAGGAGCAGATGATACAGTATTAGAAGATATAACTTTGCCAGGAAAATGGAAACCAAAAATGATAGGGGGAATTGGAGGTTTTATCAAGGTAAAGCAATATGATCAGATACCTATAGAAATTTATGGAAAAAAGGCTATAGGTACAGTGTTAGTAGGACCTACACCTATCAACATAATTGGACGAAATATGTTGACTCAGCTTGGTTGTACTTTAAATTTCCCAATTAGCCCTATTGACACTGTACCAGTAAAATTAAAGCCAGGAATGGATGGACCAAAGGTTAAACAATGGCCATTAACAGAAGAAAAAATAAAGGCACTA…
080205_2016_AE	~~~~~~~~~~~~~~~TGGCAACGACCCMTTGTCACARTAAAAATAGGAGGACAGRTGAAAGAAGCTCTATTAGATACAGGAGCAGATGATACAGTATTAGAAGATATAAATTTGCCAGGAAAATGGAAACCAAAAATGATAGGGGGAATTGGAGGTTTTATCAARGTAAAGCAATATGATCAGATASTTATRGAAATTTGTGGRAAAAAGGCTATAGGTACAGTGTTAGTAGGACCTACACCTRTCAACATAATTGGACGAAATATGTTGACTCAGaTTGGWTGTACTTTAAATYTCCCAATTAGCCCTATTGACACTGTACCAGTAACATTAAARCCAGGAATGGATGGRCCAARGGTTAAACAGTGGCCATTAACAGAAGAAAARATAAARGCAYTA…
080206_2016_AE	cctcaaatcactctttggcaacgacctgttgtcccagtaaaaatagaaggacagataaaagaagctctattagacacaggagcagatgatacagtattagaagatataaatttgccaggaaaatggaaaccaaaaatgatagggggaattggaggttttatcaaggtaaaacaatatgatcagatacttatagaaatttgtggaaaaagggctataggtacagtgttagtagggcctacacctgtcaacataattggacgaaatatgttgactcagattggytgtactttaaatttcccaattagccctattgaaactgtaccagtaaaattaaagccaggaatggatggaccaaaggttaaacagtggccattaacagaagaaaaaataaaagcatta…
302825_2016_AE	CCTCAAATCACTCTTTGGCAACGACCCATTGTCACAGTAAAAATAGAAGGACARATGAAAGAAGCTYTAYTAGATACAGGAGCAGATGATACAGTATTAGAAGATATAAATTTGCCAGGAAAATGGAAACCAAAAATGATAGGGGGAATTGGAGGTTTTATCAAGGTAAGGCAATATGATCAGATACTTATAGAAATTTGTGGAAAAAGAGCTAGAGGTACAGTGTTAGTAGGACCTACACCTGTCAACATAATTGGACGAAATATGTTGACTCAGATTGGTTGTACTTTAAATTTYCCAATTAGCCCTATTGACACTGTACCAGTAAAATTAAAGCCAGGAATGGATGGACCAAAGGTTAAACAGTGGCCATTAACAGAAGAAAAAATAAAAGCATTA…
080902_2016_AE	CCTCAAATCACTCTTTGGCAACGACCCCTTGTCACAATAAAAATAGGAGGACAGATGAAAGAAGCTCTATTAGATACAGGAGCAGATGATACAGTATTAGAAGATATAAATTTGCCAGGAAAATGGAAACCAAAAATGATAGGGGGAATTGGAGGTTTTATCAAAGTAAGGCAATATGATCAGATAGTTATAGAAATTTGTGGAAAAAGGGCTATAGGTACAGTGTTAGTAGGACCTACACCTGTCAACATAATTGGACGAAATATGTTGACTCAGCTTGGTTGTACTTTAAATTTCCCAATTAGCCCTATTGACACTGTACCAGTAACATTAAAGCCAGGAATGGATGGACCAAAGGTTAAACAATGGCCATTAACAGAAGAAAAAATAAAAGCATTA…
080903_2016_AE	~~~~~~~~~~~~~~~TGGCARCGACCCCTTGTCACAATAAAAATAGGAGGACAGATAAAAGAAGCTCTATTAGATACAGGAGCAGATGATACAGTATTAGAAGATATAAATTTGCCAGGAAAATGGAAACCAAAAATGATAGGGGGAATTGGAGGTTTTATYAAGGTAAAGCAATATGATCAGATACTTATAGAAATTTGTGGAAAAAGGGCTATAGGTACAGTGTTAGTAGGACCTACACCTATCAACATAATTGGACGAAATATGTTGACTCAGCTTGGTTGTACTTTAAATTTCCCAATTAGCCCTATTGACACTGTACCAGTAAAATTRAAGCCAGGAATGGATGGACCAAAGGTTAAACAGTGGCCATTAACAGAAGAAAAAATAAAGGCACTA…
080904_2016_AE	~~~~~~~~~~~~~~~TGGCAACGACCCCTTGTCACAATAAAAATAGGAGGACAAATAAAAGAAGCTCTATTAGATACAGGAGCAGATGATACAGTATTAGAAGATATAAATTTGCCAGGAAAATGGAAACCAAAAATGATAGGGGGAATTGGAGGTTTTATCAAGGTAAGGCAATATGATCAGATAATGATAGARATYTGTGGAAAAARRGCTRTAGGTACAGTGTTAGTAGGACCTACACCYATCAACATAATTGGACGAAATATGTTGACTCAGCTTGGTTGTACTTTAAATTTCCCAATTAGCCCTATTGACACTGTACCAGTAAAATTAAAGCCAGGAATGGATGGACCAAAGGTTAAACAGTGGCCATTAACGGAAGAAAARATAAAAGCATTA…
080908_2016_AE	cctcaaatcactctttggcaacgaccccttgtctcagtaaaaataggaggacagataaaagaagctctattagatacaggagcagatgatacagtattagaagatataaatttgccaggaaaatggaaaccaaaaatgatagggggaattggaggttttatcaaggtaaggcaatatgatcagatacttatagaaatttgtggaaaaaaggctataggtacagtattagtaggacctacacctgtcaacataattggacgaaatatgttgactcagattggttgtactttaaatttcccaattagccctattgacactgtaccagtaacattaaagccaggaatggatggaccaaaggttaaacagtggccattaacagaagaaaaaataaaagcatta…
080917_2016_AE	~~~~~~~~~~~~~~~TGGCAACGACCCCTTGTCACAATAAAAATAGGAGGACAAATGARAGAAGCTCTATTAGATACAGGAGCAGATGATACAGTATTAGAAGATATAAATTTGCCAGGAAAATGGAAACCAAAAATGATAGGGGGAATTGGAGGTTTTATCAAGGTAAGGCAATATGATCAGATAACTATAGAAATTTGTGGAAAAAAGGCTATAGGTACAGTGTTAGTAGGACCTACACCTGTCAACATAATTGGACGAAATATGTTGACTCAGCTTGGTTGTACTTTAAATTTYCCAATTAGCCCTATTGACACTGTACCAGTAACATTAAAGCCAGGAATGGATGGACCAAAGGTTAAACAGTGGCCATTAACAGAAGAAAAAATAAAAGCATTA…
080919_2016_AE	~~~~~~~~~~~~~~~TGGCAACGACCTGTTGTCACAGTAAAAATAGMAGGACAGMTAAAAGAAGCTCTATTAGACACAGGAGCAGATGATACAGTATTAGAAGATATAAATTTACCAGGAAAATGGAAACCAAAAATGATAGGGGGAATTGGAGGTTTTATCAAGGTAAARCAATATGATCAGATACTTATAGAAATTTGTGGAAAAAGGGCTATAGGTACAGTGTTAGTAGGGCCTACACCTGTCAACATAATTGGACGAAATATGTTGACTCAGMTTGGTTGTACTTTAAATYTCCCAATTAGCCCTATTGAAACTGTACCAGTAAAATTAAAGCCAGGAATGGATGGACCAAAGGTTAAACAGTGGCCATTRACAGAAGAAAAAATAAAAGCATTA…
081602_2016_AE	~~~~~~~~~~~~~~~TGGCAACGACCCCTTGTCACAATAArARTAGGAGGACARATMAAAGAAGCTCTATTAGATACAGGAGCAGATGATACAGTATTAGAAGATATAAATTTGCCAGGAAAATGGAAACCAAAAATGATAGGGGGAATTGGAGGTTTTATCAAAGTAAGGCAATATGATCAGATACTTATAGAAATTTGTGGAAAAAAGGCTATAGGTACAGTGTTAGTAGGACCTACACCTATCAACATAATTGGACGAAATATGTTGACTCAGCTTGGTTGTACTTTAAATTTCCCAATTAGCTCTATTGACACTGTACCAGTAACATTAAAGCCAGGAATGGATGGACCAAAGGTTAAACAGTGGCCATTAACAGAAGAAAAAATAAAAGCATTA…
302885_2016_AE	cctcaaatcactctttggcaacgaccccttgtcacaataaaaatagaaggacagatgaaagaagctctattagatacaggagcagatgatacagtattagaagatatagatttgccaggaaaatggaaaccaaaaatgatagggggaattggaggttttatcaaggtaaggcaatatgatcagatacttatagaaatttgtggaaaaagggctataggtacagtgttagtaggacctacacctgtcaacataattggacgaaatatgttgactcagcttggttgtactttaaatttcccaattagtcctattgacactgtaccagtaacattaaagccaggaatggatggaccaaaggttaaacagtggccattaacagaagaaaaaataaaagcatta…
081610_2016_AE	~~~~~~~~~~~~~~~TGGCAACGACCCCTTGTTACCATAAAAATAGGGGGACAAATAAAAGAAGCTCTATTAGATACAGGAGCAGATGATACAGTATTAGAAGAAATAAACTTGCCAGGAAAATGGAAACCAAAAATGATAGGGGGAATTGGAGGTTTTATCAAGGTAAGGCAATATGATCAGATAATGATAGAGATCTGTGGAAAAAAGGCTATAGGTACAGTGTTAGTAGGACCTACACCTATCAACATAATTGGACGAAATATGTTGACTCAGCTTGGTTGTACTTTAAATTTCCCAATTAGCCCTATTGACACTGTACCAGTAAAATTAAAGCCAGGAATGGATGGACCAAAGGTTAAACAATGGCCATTAACAGAAGAAAAAATAAAAGCATTA…
081613_2016_AE	~~~~~~~~~~~~~~~TGGCAACGACCCCTTGTCACAATAAAAATAGGAGGACAGATAAARGAAGCTCTATTAGATACAGGAGCAGATGATACAGTATTAGAAGAAATAAATTTGCCAGGAAAATGGAAACCAAAAATGATAGGGGGAATTGGAGGTTTTATCAARGTAAGGCAATATGATCAGATACTTATAGAAATTTGTGGAAAAAAGGCTATAGGTACAGTGTTAGTAGGACCTACACCTGTCAACATAATTGGACGAAATATGTTGACTCAGCTTGGTTGTACTTTAAATTTCCCAATTAGCCCTATTGACACTGTACCAGTAACATTAAAGCCAGGRATGGATGGACCAAAGGTTAAACAGTGGCCATTAACAGAAGAAAAAATAAAAGCATTA…
081617_2016_AE	~~~~~~~~~~~~~~~TGGCAACGACCCCTTGTCACAATAAAAATAGGAGGACAGATAAGAGAAGCTCTATTAGATACAGGAGCAGATGATACAGTATTAGAAGATATAAATTTGCCAGGAAAATGGAAACCAAAAATGATAGGGGGAATTGGAGGTTTTATCAAGGTAAGACAATATGATCAGATACTTATAGAAATTTGTGGAAAAAAGGCTATAGGTACAGTGTTAGTAGGACCTACACCTGTCAACATAATTGGACGAAATATGTTGACTCAGCTTGGTTGTACTTTAAATTTCCCAATTAGCCYCATTGACACTGTACCAGTAACATTAAAGCCAGGAATGGATGGACCAAAGGTTAAACAGTGGCCATTAACAGAAGAAAAAATAAAAGCATTA…
082305_2016_AE	~~~~~~~~~~~~~~~TGGCAACGACCCCTTGTCACAATAAAAATAGAAGGACAGATAAAAGAAGCTCTATTAGATACAGGAGCAGATGATACAGTATTAGAAGAAATAAATTTGCCAGGAAAATGGAAACCAAAAATGATAGGGGGAATTGGAGGTTTTATCAAGGTAAGGCAATATGATCAGATACTTATAGAAATTTGTGGGAAAAAGGCTATAGGCACAGTGTTAGTAGGACCTACACCTGTCAACATAATTGGACGAAATCTGTTGACTCAGCTTGGTTGTACTTTAAATTTYCCAATTAGCCCTATTGACACTGTACCAGTGACATTAAAACCAGGAATGGATGGACCAAAGGTTAAACAGTGGCCATTAACAGAAGAAAAAATAAAAGCATTA…
082306_2016_AE	~~~~~~~~~~~~~~~TGGCAACGACCCCTTGTCACAGTAAAAGTAGGAGGACAGATGAGAGAAGCTCTATTAGATACAGGAGCAGATGATACAGTATTAGAAGATATAAATTTGCCAGGAAAATGGAAACCAAAAATGATAGGGGGAATTGGAGGTTTTATCAAGGTAAAGCAATATGATCAGATACTTATAGAAATTTGTGGAAAAAAGGCTATAGGTACAGTGTTAGTAGGACCTACACCTGTCAATATAATTGGACGAAATATGTTAACTCAAATTGGTTGTACTTTAAATTTCCCAATTAGCCCCATTGACACTGTACCAGTAACATTAAAGCCAGGAATGGATGGACCAAAGGTTAAACAGTGGCCATTAACAGAAGAAAAAATAAAAGCATTA…
082307_2016_AE	~~~~~~~~~~~~~~~TGGCAACGACCCCTTGTCACAGTAAAAGTAGGAGGACAGATGAGAGAAGCTCTATTAGATACAGGAGCAGATGATACAGTATTAGAAGATATAAATTTGCCAGGAAAATGGAAACCAAAAATGATAGGGGGAATTGGAGGTTTTATCAAGGTAAAGCAATATGATCAGATACTTATAGAAATTTGTGGAAAAAAGGCTATAGGTACAGTGTTAGTAGGACCTACACCTGTCAATATAATTGGACGAAATATGTTAACTCAAATTGGTTGTACTTTAAATTTCCCAATTAGCCCCATTGACACTGTACCAGTAACATTAAAGCCAGGAATGGATGGACCAAAGGTTAAACAGTGGCCATTAACAGAAGAAAAAATAAAAGCATTA…
082308_2016_AE	~~~~~~~~~~~~~~~TGGCAACGACCCCTTGTCACAGTAAAAATAGGAGGACAGGTGAAAGAAGCTCTATTAGATACAGGAGCAGATGATACAGTATTAGAAGAAATAAATTTGCCAGGAAAATGGAAACCAAAAATGATAGGGGGAATTGGAGGTTTTATCAAGGTAAGGCAATATGATCAGATACTTATAGAAATTTGTGGGAAAAAGGCTATAGGTACAGTGTTAGTRGGACCTACACCTGTCAACATAATTGGACGAAATATGTTGACTCAGATTGGTTGTACTTTAAATTTCCCAATTAGCCCTATTGACACTGTACCAGTAACATTAAAGCCAGGAATGGATGGACCAAAGGTTAAACAGTGGCCATTAACAGAAGAAAAAATAAAAGCATTA…
082309_2016_AE	~~~~~~~~~~~~~~~TGGCAACGACCCCTTGTCACAATAAAAATAGGAGGACAGATAAAAGAAGCTCTATTAGATACAGGAGCAGATGATACAGTATTAGAAGATATAAATTTGCCAGGAAAATGGAAACCAAAAATGATAGGGGGAATTGGAGGTTTTATCAARGTAAGGCAATATGATCAGRTAKCTATAGAAATTTGTGGAAAAAAGGCTATAGGCACAGTGTTAGTAGGACCTACACCTATCAACATAATTGGACGAAATATGTTGACTCAGCTTGGTTGTACTTTAAATTTCCCAATTAGTCCTATTGACACTGTACCAGTAACATTAAAGCCAGGAATGGATGGACCAAAGGTTARACAGTGGCCATTAACAGAAGAAAAAATAAAAGCATTA…
082310_2016_AE	~~~~~~~~~~~~~~~TGGCAACGACCCCTTGTCACAGTAAAAATAGGAGGACAGGTGARAGAAGCTCTATTAGATACAGGAGCAGATGATACAGTATTAGAAGAAATAAATTTGCCAGGAAAATGGAAACCAAAAATGATAGGGGGAATTGGAGGTTTTATCAARGTAAGGCAATATGATCAGATACTTATAGAAATTTGTGGRAAAAAGGCTATAGGTACAGTGTTAGTAGGACCTACACCTGTCAACATAATTGGACGAAATATGTTGACTCAGATTGGTTGTACTTTAAATTTCCCAATTAGCCCTATTGACACTGTACCAGTAACATTAAARCCAGGAATGGATGGACCAAARGTTAAACARTGGCCATTAACAGAAGAAAAAATAAAAGCATTA…
082316_2016_AE	CCTCAAATCACTCTTTGGCAACGACCTCTTGTCACAATMAAAGTAGCAGGACAGATGAAAGAAGCTCTATTAGATACAGGAGCAGATGATACAGTATTAGAAGATATAAATTTGCCAGGAAAATGGAAACCAAAAATGATAGGGGGAATTGGAGGTTTTATCAAGGTAAAGCAATATGATCAGATACTTATAGAAATTTGTGAAAAAAAGGCTATAGGTACAGTGTTAGTAGGACCTACACCTGTCAACATAATTGGACGAAATATGTTGACTCAGCTTGGTTGTACTTTAAATTTCCCAATTAGCCCTATTGACACTGTACCAGTAACATTAAAGCCAGGAATGGATGGACCAAAGGTTAAACAGTGGCCTTTAACAGAAGAAAAAATAAAAGCATTA…
082318_2016_AE	~~~~~~~~~~~~~~~TGGCAACGACCCCTTGTCACAGTAAAAATAGRRGGACAGGTGAWAGAAGCTCTATTAGATACAGGAGCAGATGATACAGTATTAGARGAAATAAATTTGCCAGGAAAATGGAAACCAAAAATGATAGGGGGAATTGGAGGTTTTATCAAGGTAARGCAATATGATCAGATACTTATAGAAATTTGTGRAAAAAAGGCTATAGGTACAGTGTTAGTAGGACCTACACCTGTCAACATAATTGGACGAAATATGTTGACTCAGATTGGTTGTACTTTAAATTTCCCAATTAGCCCTATTGACACTGTACCAGTAACATTAAAGCCAGGAATGGATGGACCAAAGGTTAAACARTGGCCATTAACAGAAGAAAAAATAAAAGCATTA…
083008_2016_AE	~~~~~~~~~~~~~~~TGGCAACGACCCcTTGTCACARTAAAAGTAGGAGGAcAGATaAAAGAAGCTCTATTAGATACAGGAGCAGATGATACAGTATTAGAAGATATAAATTTGCCAGGAAAATGGAAACCAAAAATGATAGGGGGAATTGGAGGTTTTATYAAAGTAAGGCAATATGATYAGATACCTATAGAAATTTGTGGAAAAAAGGCTGTGGGTACAGTGTTAGTAGGACCTACACCTATCAACATAATTGGACGAAATATGTTGACTCAGCTTGGTTGTACTTTAAATTTCCCAATTAGCMMTATTGACACTGTACCAGTAAAATTAAAGCCAGGAATGGATGGACCAAAGGTTAAACARTGGCCATTAACAGAAGAAAAAATAAAAGCATTA…
083009_2016_AE	~~~~~~~~~~~~~~~TGGCAACGACCCCTTGTCACAATAAAAATAGGAGGACAGATGAAAGAAGCTCTATTAGATACAGGAGCAGATGATACAGTATTAGAAGATATAGATTTGCCAGGAAAATGGAAACCAAAAATAATAGGGGGAATTGGAGGTTTTATCAAGGTAAAGCAATATGATCAGATACTTATAGAAATTTGTGGAAAAAAGGCTATAGGTACAGTGTTAGYAGGACCTACACCTGTCAACATMATTGGACGAAATATGTTGACTCAGCTTGGTTGTACTTTAAATTTCCCAATTAGCCCTATTGACACTGTACCAGTAAMATTAAAGCCAGGGATGGATGGACCAAAGGTTAAACAGTGGCCATTAACAGAAGAAAAAATAAAAGCATTA…
083010_2016_AE	CCTCAAATCACTCTTTGGCAACGACCCCTTGTCACAATAAAAATAGGAGGACAGATRAAAGAAGCTCTATTAGATACAGGAGCAGATGATACAGTATTAGAAGATATAGATTTGCCAGGAAAATGGAAACCAAAAATAATAGGGGGAATTGGAGGTTTTATCAAGGTAAAGCAATATGATCAGATACTTATAGAAATTTGTGGAAAAAAGGCTATAGGTACAGTGTTAGTAGGACCTACACCTGTCAACATAATTGGACGAAATATGTTGACTCAGCTTGGTTGTACTTTAAATTTCCCAATTAGCCCTATTGACACTGTACCAGTAACATTAAAGCCAGGGATGGATGGACCAAAGGTTAAACAGYGGCCATTAACAGAAGAAAAAATAAAAGCATTA…
083013_2016_AE	~~~~~~~~~~~~~~~TGGCAACGACCCCTTGTCCCAGTAAAAATAGGAGGACAGATRATAGAAGCTCTATTAGATACAGGAGCAGATGATACAGTATTAGAAGATATAAATTTGCCAGGAAAATGGAAACCAAAAATGATAGGGGGAATTGGAGGTTTTATCAAGGTAAGRCARTATGATCAGATASTTATAGAAATTTGTGGAAAAAAGGCTATAGGTACAGTGTTAGTAGGACCTACACCTATCAACATAATTGGACGAAATATGTTGACTCAGATTGGTTGTACTTTAAATTTCCCAATTAGTCCTATTRAMACTGTACCAGTAAAAYTAAARCCAGGGATGGATGGACCAAAGGTYAAACAGTGGCCATTAACAGAAGAAAAAATAAAAGCATTA…
083015_2016_AE	~~~~~~~~~~~~~~~TGGCAACGACCCCTTGTCACAATAAAAGTAGGAGGACAGATGAGAGAAGCTCTATTAGATACAGGAGCAGATGATACAGTATTAGAAGATATAAATTTGCCAGGAAAATGGAAACCAAAAATGATAGGGGGAATTGGAGGTTTTATCAAGGTAAAGCAATATGATCAGATATCTATAGAAATTTGTGGAAAAAGGGCTATAGGTACAGTGTTAGTAGGACCCACACCTATCAACATAATTGGACGAAATATGTTRACTCAGATTGGTTGTACTTTAAATTTCCCAATTAGYYCTATTGACACTAYACCAGTAACATTAAAGCCAGGAATGGATGGACCAAAGGTTAAACAGTGGCCATTAACAGAAGAAAAAATAAAGGCACTA…
083019_2016_AE	~~~~~~~~~~~~~~~TGGCAACGACCCcTTGTCACAATAAAAATAGCAGGACAGATGAAAGAAGCTCTATTAGATACAGGAGCAGATGATACAGTATTAGAAGATATAAATTTGCCAGGAAAATGGAAACCAAAAATGATAGGGGGAATTGGAGGTTTTATCAAGGTAAGGCAATATGATCAGATATCTATAGAAATTTGTGGAAAAAGGGCTACAGGTACAGTGTTAGTAGGACCTACACCTGTCAACATAATTGGAAGAAATATGTTGACTCAGCTTGGTTGTACTTTAAATTTCCCAATTAGCCCTATTGACACTGTACCAGTAACATTAAAGCCAGGAATGGATGGACCAAAGGTTAAACAGTGGCCATTAACAGAAGAAAAAATAAAAGCATTA…
302849_2016_AE	cctcaaatcactctttggcagcgaccccttgtcacagtaaaaataggaggacagatgaaagaagctctgttagatacaggagcagatgatacagtattagaagatatagatttaccaggaaaatggaaaccaaaaatgatagggggaattggaggttttatcaaagtaaggcaatatgatcagatacctatagaaatttgtggaaaaaaggctataggtacagtgttagtaggacctacacctgtcaacataattggacgaaatatattgatgcagattggttgtactttaaatttcccaattagccccattgacactgtaccagtaacattaaagccaggaatggatgggccaaaggttaaacagtggccattaacagaagaaaaaataaaagcatta…
083022_2016_AE	~~~~~~~~~~~~~~~TGGCAACGACCCCTTGTCACAGTAAAAGTAGGAGGACAGATAAAAGAAGCTCTATTAGATACAGGAGCAGATGATACAGTATTAGAAGATATAAATTTGCCAGGAAAATGAAAACCAAAAATGATAGGGGGAATTGGAGGTTTTATCAAGGTAAGGCAATATGATCAGATACTTATAGAAATTTGTGGAAAAAAGGCTATAGGTACAGTGTTAGTAGGACCTACACCTGTCAACATAATTGGACGAAATATGTTGACTCAGATTGGTTGTACTTTAAATTTCCCCATTAGCCCTATTGACACTGTACCAGTAACATTAAAGCCAGGGATGGATGGACCAAAGGTTAAACAGTGGCCATTAACAGAAAAAAAAATAAAAGCATTA…
090602_2016_AE	~~~~~~~~~~~~~~~TGGCAACGACCCCTTGTCACAATAAAAATAGGAGGACAGATAAAAGARGCTCTATTAGATACAGGAGCAGATGATACAGTATTAGAAGATATAAATTTGCCAGGAAAATGGAAACCAAAAATGATAGGGGGAATTGGRGGTTTTATYAAGGTAAAGCAATATGATCAGATAGYTATAGAAATTTGTGGAAAAAAGGCTATAGGTACAGTGTTAGTAGGACCTACACCTATCAACATAATTGGACGAAATATGTTGACTCAGCTTGGTTGTACTTTAAATTTYCCAATTAGCCCTATTGACACTGTACCAGTAACATTAAAGCCAGGAATGGATGGACCAAAGGTTAAACAGTGGCCATTAWCAGAAGAAAAAATAAARGCACTW…
090605_2016_AE	~~~~~~~~~~~~~~~TGGCAACGACCTATTGTCACAGTAAAAATAGAAGGACAGATAAGAGAAGCYCTATTAGACACAGGAGCAGATGATACAGTATTAGAAGATATAAATTTGCCAGGAAAATGGAAACCAAAAATGATAGGGGGAATTGGAGGTTTTATCAAGGTAAAACAATATGATCAGATACTTATAGAAATTTGTGGAAAAAGGGCTATAGGTACAGTGTTAGTAGGACCTACACCTGTCAACATAATTGGACGAAATATGTTGACTCAGCTTGGTTGTACCTTAAATTTTCCAATCAGTCCTATTGAAACTATACCAGTAAAACTAAAGCCAGGAATGGATGGCCCAAAGGTTAAACAATGGCCATTGACAAAAGAGAAAATAGAAGCATTA…
090609_2016_AE	~~~~~~~~~~~~~~~TGGCAACGACCCCTTGTCTCAATAAAAATAGGAGGACAGRTAAAAGAAGCTCTATYAGATACAGGAGCAGATGATACAGTATTAGAAGATATAAATTTGCCAGGAAAATGGAAACCAAAAATAATAGGGGGAATTGGAGGTTTTATCAAAGTAAAGCAATATGATCAGATACCTATAGAAATTTGTGGAAAACAGGCTATAGGTACAGTGTTAGTAGGACCTACACCTGTCAACATAATTGGACGAAATATGTTGACTCAGCTTGGTTGTACTTTAAATTTCCCAATTAGTCCTATTGACACTGTACCAGTAAAATTAAAGCCAGGRATGGATGGACCAAAGGTTAAACAGTGGCCATTAACAGAAGAAAAAATAAAAGCATTA…
091301_2016_AE	~~~~~~~~~~~~~~~TGGCARCGACCCCTTGTCACAATAAAAATAGGGGGACAAATGAAAGAAGCTCTATTAGATACAGGAGCAGATGATACAGTATTAGAAGATATAAATTTGCCAGGAAAATGGAAACCAAAAATGATAGGGGGAATTGGAGGTTTTATCAAAGTAAGRCAATATGATCAGATACCTATAGAAATTTGTGGAAAAAGGGCTATAGGTACAGTGTTAGTAGGACCTACACCTATCAACATAATTGGACGAAATATGTTGACTCAGCTTGGTTGTACTTTAAATTTCCCAATTAGCCCTATTGACACTGTACCAGTAAAATTAAAGCCAGGAATGGATGGACCAAAGGTTAAACAGTGGCCAYTAACAGAAGAAAAAATAAAAGCATTA…
091308_2016_AE	~~~~~~~~~~~~~~~TGGCAACGACCCCTTGTCACAGTAAAAATAGGAGGACAGATKAAAGAAGCTCTATTAGATACAGGAGCAGATGATACAGTATTAGAAGATATAAATTTGCCAGGAAAATGGAAACCAAAAATGATAGGGGGAATTGGAGGTTTTATCAAGGTCAGGCAATATGATCAGATACTTATAGAAATTTGTGGAAAAAGGGCTATAGGTACAGTRTTAGTAGGGCCTACACCTGTCAACATAATTGGACGAAATATGTTGACTCAGCTTGGTTGTACTTTAAATTTCCCAATAAGCCCTATTAACACTATACCAGTAAAATTAAAGCCAGGAATGGATGGACCAAAGGTTAAACAGTGGCCATTAACAGAAGAAAAAATAAAAGCCTTA…
091310_2016_AE	~~~~~~~~~~~~~~~TGGCAACGACCCCTTGTCACAGTAAAAATAGGAGAACAGATGAGAGAAGCTCTATTAGATACAGGAGCAGATGATACAGTATTAGAAGAAATAAATTTGCCAGGWAAATGGAAACCAAAAATGATAGGGGGAATTGGAGGTTTTATCAAGGTAAGGCAATATGATCAGATACCTATAGAAATTTGTGGAAAAAAGGCTRTAGGTACAGTGTTAGTAGGACCTACACCTGTCAACATAATTGGACGAAATATGTTGACTCAGCTTGGTTGTACTTTAAATTTCCCAATTAGYCCTATTGMCACTGTACCAGTAAAATTAAAGCCAGGRATGGATGGACCAAAGGTTAAACAGTGGCCATTAACAGAAGAAAAAATAAAAGCATTA…
091311_2016_AE	~~~~~~~~~~~~~~~TGGCAACGACCCCTTGTTACAATAAAAATAGGAGGACAGATGAGAGAAGCTCTATTAGATACAGGAGCAGATGATACAGTATTAGAAGATATAAATTTGCCAGGAAAATGGAAACCAAAAATGATAGGGGGAATTGGAGGTTTTATCAAGGTAAAGCAATATGATCAGATACCTATAGAAATTTGTGGAAAAAAGGCTATAGGTACAGTGTTAGTAGGACCTACACCTATCAACATAATTGGACGAAATATGTTGACTCAGCTTGGTTGTACTYTAAATTTCCCAATTAGCCCTATTGACACTGTACCAGTAAAATTAAAGCCAGGAATGGATGGACCAAAGGTTAAACARTGGCCATTAACAGAAGAAAAAATAAARGCATTA…
091313_2016_AE	~~~~~~~~~~~~~~~TGGCAACGACCCCTTGTCACAATAAAAATAGGAGGACAGATAAAAGAAGCTCTGTTAGATACAGGAGCAGATGATACAGTATTAGAAGATATAGAWTTGCCAGGAAAATGGAAACCAAAAATGATAGGGGGAATTGGAGGTTTTATCAARGTAAGGCAATATGATCAGATACYTATAGAAATTTGTGGAAAAAAGGCTATAGGTACAGTGTTAGTAGGACCTACACCTATCAACATAATTGGACGAAATATGTTGACTCAGCTTGGCTGTACTTTAAATTTCCCAATTAGCCCTATTGACACTGTACCAGTAAMATTAAAGCCAGGRATGGATGGACCAAAGGTTAAACAGTGGCCATTAACAGAAGAAAAAATAAARGCATTA…
091314_2016_AE	~~~~~~~~~~~~~~~TGGCAACGACCCCTTGTTACAGTAAAAATAGGAGGACAGATGATAGAAGCTCTATTAGATACAGGAGCAGATGACACAGTATTAGAAGATATAAATTTGCCAGGAAAATGGAAACCAAAAATGATAGGGGGAATTGGAGGTTTTATCAAAGTAARGCAATATGATCAGATACTTATAGAAATTTGTGGGAAAAAGGCCATAGGTACAGTGTTAGTAGGACCTACACCTATCAACATAATTGGACGAAATATGTTGACTCAGATTGGTTGTACTTTAAATTTCCCAATTAGYCCTATTGACACTGTACCAGTAACATTAAAGCCAGGAATGGATGGACCAAAGGTTAAGCAGTGGCCATTAACAGAAGAAAAAATAAAAGCATTA…
091318_2016_AE	~~~~~~~~~~~~~~~TGGCAACGACCCCTTGTCACAGTAAAAATAGGAGGACAGATGAAAGAAGCTCTATTAGATACAGGAGCAGATGATACAGTATTAGAAGAGATAAATTTGCCAGGAAAATGGAAACCAAAAATGATAGGGGGAATTGGRGGTTTTATCAAAGTAAGGCAATATGATCAGATACCTATAGAAATTTGTGGAAAAAAGGCTATAGGTACAGTGTTAGTAGGACCTACACCTGTCAACATAATTGGACGAAATATGTTGACTCAGATTGGTTGTACTTTAAATCTCCCAATTAGCCCTATTGACACTGTGCCAGTAACATTAAAGCCAGGAATGGATGGACCAAAGGTTAAACAGTGGCCATTAACAGAAGAAAAAATAAAAGCATTA…
092001_2016_AE	~~~~~~~~~~~~~~~TGGCAACGACCCCTTGTTACAATAAAAATAGGAGGACAGATGAAAGAAGCTCTATTAGATACAGGAGCAGATGATACAGTTTTAGAAGATATAAATTTGCCAGGAAAATGGAAACCAAAAATGATAGGGGGAATTGGAGGTTTTATCAARGTAAGGCAATATGATCAGATACCTATAGAAATTTGTGGAAAAAAGGCCATAGGTACAGTGTTAGTAGGACCTACACCTATTAATATAATTGGACGAAATATGTTGACTCAGCTTGGGTGTACTTTAAACTTCCCAATTAGCCCTATTGACACTGTACCAGTAAAATTAAAGCCAGGAATGGATGGACCAAAGGTTAAACAGTGGCCATTAACAGAAGAAAAAATAAAAGCATTA…
092002_2016_AE	~~~~~~~~~~~~~~~TGGCAACGACCCCTTGTCACAGTAAAAATAGGAGGACAGATAAAAGAAGCTCTATTAGATACAGGAGCAGATGATACAGTATTAGAAGARATAAATTTGCCAGGAAAATGGAAACCAAAAATGATAGGGGGAATTGGAGGTTTTATCAAGGTAAGGCAATATGATCAGATACTTATAGAAATTTGTGGAAAAAAGGCTATAGGTACAGTGCTAGTAGGACCTACACCTGTCAACATAATTGGACGAAATATGCTGACTCAGCTTGGGTGTACTTTAAATTTCCCAATTAGCCCTATTGACACTGTACCAGTAACATTAAAGCCAGGAATGGATGGACCAAAGGTTAAACAGTGGCCATTAACAGAAGAAAAAATAAAAGCATTA…
092005_2016_AE	~~~~~~~~~~~~~~~TGGCAACGACCCSTTGTCACAATAAAAATAGCAGGACAGATGARAGAAGCTCTATTAGATACAGGAGCAGATGATACAGTATTAGAAGATATAAATTTGCCAGGAAAATGGAAACCAAAAATGATAGGGGGAATTGGAGGTTTTATCAAGGTAAAGCAATATGATCAGRTACYTATAGAAATTTGTGGAAAAARGGCTATAGGTTCAGTGTTAGTAGGACCTACACCTGTCAACATAATTGGACGAAATATGTTGACTCAGMTTGGTTGTACTTTAAATTTCCCAATTAGCCCTATTGACACTGTACCAGTAAAATTAAAGCCAGGAATGGATGGACCAAAGGTTAAACAGTGGCCATTAACAGAAGAAAAAATAAAAGCRTTA…
092008_2016_AE	~~~~~~~~~~~~~~~TGGCAACGACCCCTTGTCACARTAAAAATAGGAGGACAGATGAAAGAAGCTCTATTAGATACAGGAGCAGATGATACAGTATTAGAAGATATRAATTTGCCAGGAAAATGGAAACCRAAAATGATAGGGGGAATTGGAGGTTTTATCAARGTAARRCAATATGATCAGATACTTATAGAAATTTGTGGAAAWAAGGCTATAGGTACAGTGTTARTAGGACCTACACCTRTCAACATAATTGGRMGAAATMTGTTGRCTCAGATTGGATGTACTYTAAAYTTYCCAATTAGYCCTATTGAMACTRTACCAGTAAMATTAAAACCAGGAATGGATGGACCAAAGGTTAAACAGTGGCCATTRACAGAAGAAAARATAAAAGCATTA…
092708_2016_AE	~~~~~~~~~~~~~~~TGGCAACGACCCCTTGTCACAGTAAAAATAGGAGGACAGATGAAAGAAGCTCTGTTAGATACAGGAGCAGATGACACAGTATTAGAAGATATAGATTTACCAGGAAAATGGAAACCAAAAATGATAGGGGGAATTGGAGGTTTTATCAAGGTAAGGCAATATGATCAGATACTTATAGAAATTTGTGGGAAAAAGGCTATAGGTACAGTGTTAGTAGGACCTACACCTGTCAACATAATTGGACGAAATATGTTGACTCAGATTGGTTGTACTTTAAATTTCCCAATTAGCCCTATTGACACTGTACCAGTAACATTAAAACCAGGAATGGATGGACCAAAGGTTAAACAGTGGCCATTAACAGAAGAAAAAATAAAAGCATTA…
092709_2016_AE	~~~~~~~~~~~~~~~TGGCAACGACCCCTTGTCCCAATAAAAATAGCAGGACAGATAAAAGAAGCTCTATTAGATACAGGAGCAGATGATACAGTATTAGAAGATATAAATTTGCCAGGAAAATGGAAACCAAAAATGATAGGGGGAATTGGAGGTTTTATCAAGGTAAGGCAATATGATCAGATATCTATAGAAATTTGTGGAAAAAAGGCTATAGGTACAGTGTTAGTAGGACCTACACCTGTCAATATAATTGGACGTAATATGTTGACTCAGCTTGGTTGTACTTTAAATTTCCCAATTAGTCCTRTTGACACTGTACCAGTAACATTAAAGCCAGGAATGGATGGACCAAAGGTTAAACAGTGGCCATTAACAGAAGAAAAAATAAAAGCATTA…
092711_2016_AE	~~~~~~~~~~~~~~~TGGCAACGACCCCTTGTCRCAGTAAAAGTAGGAGGAGAGATRAGAGAAGCTCTATTAGATACAGGAGCAGATGATACAGTACTAGAAGATATAAATTTGCCAGGAAAATGGAAACCAAAAATGATAGGGGGAATAGGAGGTTTTATCAAGGTAARGCAATATGATCAGRTAGTTWTAGAAATTTGTGGAAAAAAGGCCATAGGTACAGTGTTAGTAGGACCTACACCTATCAATATAATTGGGCGAAATATGTTGACTCAGCTTGGTTGTACTTTAAATTTCCCAATTAGTCCTATTGACACTGTACCAGTAACATTAAAGCCAGGAATGGATGGACCAAAAGTTAAACAGTGGCCATTAACAGCAGAAAAAATAAAAGCATTA…
092712_2016_AE	~~~~~~~~~~~~~~~TGGCAACGACCCCTTGTCACARTAAAAATAGGAGGACAGATGAAAGAAGCTCTATTAGATACAGGAGCAGATGATACAGTATTAGAAGATATAAATTTGCCAGGAAAATGGAAACCRAAAATGATAGGGGGAATTGGAGGTTTTATCAARGTAARGCAATATGATCAGATACTTATAGAAATTTGTGGAAAAAAGGCTATAGGTACAGTGTTARTAGGACCTACACCTRTCAACATAATTGGRCGAAATATGTTGACTCAGATTGGATGTACTYTAAAYTTCCCAATTAGCCCTATTGACACTRTACCAGTAACATTAAAACCAGGAATGGATGGACCAAAGGTTAAACAGTGGCCATTAACAGAAGAAAAGATAAAAGCATTA…
092715_2016_AE	~~~~~~~~~~~~~~~TGGCAGCGACCCCTTGTCACAATAARAATAGAAGGACAGCTAAGAGAAGCTCTATTAGATACAGGAGCAGATGATACAGTATTAGAAGATATAAATTTGCCAGGAAAATGGAAACCAAAAATGATAGGGGGAATTGGAGGTTTTATCAAGGTAAAACAATATGATCAGATACTTATAGAAATTTGTGGAAAAAAGGCTATAGGTACAGTGTTAGTAGGACCTACACCTGTCAACATAATTGGACGAAATATGTTGACTCAGCTTGGTTGTACTTTAAATTTCCCAATTAGCCCTATTGACACTRTACCAGTAACATTAAAGCCAGGAATGGATGGACCAAAAGTTAAACAGTGGCCATTGACAGAGGAAAAAATAAAAGCATTA…
101106_2016_AE	~~~~~~~~~~~~~~~TGGCAACGACCCCTTGTCACAGTAAAAATAGGAGGACAGATGAARGAAGCTCTRTTAGATACAGGAGCAGATGATACAGTATTAGAAGATATAAGTTTGCCAGGAAAATGGAAACCAAAAATGATAGGGGGAATTGGAGGTTTTATCAAGGTAAGGCAAYATGATCAGGTACTTATAGRAATTTGTGGGAAAAAAGCTATAGGAACAGTGTTAGTAGGACCYACACCTGTCAACATAATTGGACGAAATATGTTGACTCAAATTGGTTGTACKTTAAATTTCCCAATTAGCCCTATTGACACTGTACCAGTAACATTAAAGCCAGGAATGGATGGACCAAAGGTTAAACAGTGGCCRTTAACAGAAGAAAAAATAAAAGCATTA…
101109_2016_AE	~~~~~~~~~~~~~~~TGGCAACGACCCCTTGTCACAATAAAAATAGAAGGACAGATGAGAGARGCTCTATTAGATACAGGAGCAGATGAYACAGTATTAGAAGATATAAATTTGCCAGGAAAATGGAAACCAAAAATGATAGGGGGAATTGGRGGTTTTATCAAAGTAAGGCAATATGATCAGATATGTATAGAAATTTGTGGAAAAAAGGCTATAGGTACAGTGTTAGTAGGACCTACACCTGTCAACATAATTGGACGAAAYATGTTGACTCAGCTTGGTTGTACTTTAAATTTYCCAATTAGYCCTATTGACACTGTACCAGTAACATTAAAGCCAGGAATGGATGGACCAAAGGTTAAACAGTGGCCATTAACAGAAGAAAAAATAAAAGCATTA…
101111_2016_AE	~~~~~~~~~~~~~~~TGGCAACGACCCCTTGTCACAATAAAARTAGGRGGACARATRARAGAAGCTCTAYTAGATACAGGAGCAGATGATACAGTATTAGAAGATATAAATTTGCCAGGAAAATGGAAACCAAAAATGATAGGGGGAATTGGAGGTTTTATCAAGGTAAGRCAATATGATCAGATAMTKATAGARATYTGTGGRAAAARGGCTATAGGTACAGTGTTAGTAGGACCYACACCTRTCAACATAATTGGACGAAATATGTTGACTCAGCTTGGTTGTACTTTAAATTTCCCAATTAGYCCTATTGACACTGTACCAGTAAMATTAAAGCCAGGAATGGATGGACCAAAGGTTAAACAGTGGCCATTAACAGAAGAAAAAATAAAAGCATTA…
101112_2016_AE	~~~~~~~~~~~~~~~TGGCAACGACCCCTTGTCACAATAAAAATAGGAGGACAGATGAGAGAAGCTCTRTTAGATACAGGAGCAGATGATACAGTATTAGAAGATATAAATTTGCCAGGAAAATGGAAACCAAAAATGATAGGGGGAATTGGAGGTTTTATCAAGGTAAGGCAATATGATGAGATABYTATAGAAATTTGTGGAAAAAAGGCTATAGGTACAGTGTTAGTAGGACCTACACCTATCAACATAATTGGAAGAAATATGTTGACTCAGCTTGGTTGTACTTTAAATTTCCCAATTAGCCCTATTGACACTGTACCAGTAACATTAAAGCCAGGAATGGATGGACCAAAGGTTAAACAGTGGCCATTAACAGAAGAAAAAATAAAAGCATTA…
101803_2016_AE	~~~~~~~~~~~~~~~TGGCAACGACCCCTTGTCCCAATAAAAATAGGAGGACAGATRAGGGAAGCTCTATTAGATACAGGAGCAGATGATACAGTATTAGAAGATATAAATTTGCCAGGAAAGTGGAAACCAAAAATGATAGGGGGAATTGGAGGTTTTATCAAGGTAAGGCAATATGATCAGATACYTATAGAAATTTGCGGRAAAAGGGCTATAGGTTCAGTGTTAGTAGGACCTACACCTGTCAACATAATTGGACGAAATATGTTGACTCAGCTTGGTTGTACTTTAAATTTCCCAATTAGTCCTATTGACACTGTACCAGTAACATTAAAGCCAGGAATGGATGGACCAAAGGTTAAACAGTGGCCATTAACAAAAGAAAAAATAGAAGCATTA…
101812_2016_AE	~~~~~~~~~~~~~~~TGGCAACGACCCCTTGTCACAGTAAAAATAGGRGGACAGCTGAGAGAAGCTCTATTAGATACAGGAGCAGATGATACAGTATTAGARGAGATAAATTTGCCAGGAAAATGGAAACCAAAAATCATAGGGGGAATTGGAGGTTTTATCAAGGTAAGACAATATGATCAGATACTTATAGAAATTTGTGGAAAAAAGGCTATAGGTACAGTGTTAGTAGGACCTACACCTGTCAACATAATTGGACGAAATATGTTGACTCAGCTTGGTTGTACTTTAAATTTCCCAATTAGCCCTATTGACACTGTACCAGTAACATTAAAGCCAGGAATGGATGGACCAAAGGTTAAACAGTGGCCATTAACAGAAGAAAAAATAAAAGCATTA…
302968_2016_AE	cctcaaatcactctttggcaacgaccccttgtcacagtaaaaataggaggacagataatagaagctctattagatacaggagcagatgatacagtattagaagatataaatttgccaggaaaatggaaaccaaaaatgatagggggaattggaggttttattaaggtaaggcaatatgatcagatacttatagaaatttgtgggaaaagggctgtaggtacagtgttagtaggacctacacctgtcaacataattggacgaaatatgttgactcagattggttgtactttaaatctcccaattagccctattgacactgtgccagtaaaattaaagccagggatggatggaccaaaggtaaagcagtggccattaacagaagaaaaaataaaagcatta…
101817_2016_AE	~~~~~~~~~~~~~~~TGGCAGCGACCCCTTGTTACAGTAAAAGTAGGAGGACAGATGAAAGAAGCTCTATTAGATACAGGAGCAGATGATACAGTATTAGAAGATATAAATTTGCCAGGAAAATGGAAACCAAAAATGATAGGGGGAATTGGAGGTTTTATCAAGGTAAGGCAATATGATCAGATACCTATAGAAATTTGTGGGAAAAAGGCTATAGGTACAGTGTTAGTAGGACCTACACCTGTCAACATAATTGGACGAAATATGTTGACTCAGCTTGGCTGTACTTTAAATTTCCCAATTAGCCCTATTGACACTGTACCAGTAACATTAAAGCCAGGAATGGATGGACCAAAGGTTAAACAGTGGCCATTAACAGAAGAAAAAATAAAAGCATTA…
102503_2016_AE	~~~~~~~~~~~~~~~TGGCAACGACCCCTYGTCACAATAAAAATAGGAGGACAGATAAAAGAAGCTCTATTAGATACAGGAGCAGATGATACAGTATTAGAAGATATAAATTTGCCAGGAAAATGGAAACCAAAAATGATAGGGGGAATTGGAGGGTTTATCAAGGTAAGGCAATATGATCAGATAACTATAGAAATTTGTGGRAAAAAGGCTATAGGTACAGTGTTAGTAGGACCTACACCTATCAACATAATTGGACGAAATATGTTGACTCAGCTTGGTTGTACTTTAAATTTCCCAATTAGCCCTATTGACACTGTACCAGTAAAATTAAAGCCAGGAATGGATGGACCAAARGTTAAACAGTGGCCATTAACAGAAGAAAAAATAAAAGCATTA…
102504_2016_AE	~~~~~~~~~~~~~~~TGGCAACGACCCCTTGTYACAATAAAAGTAGGRGGRCAGATGAGAGAAGCTCTATTAGATACAGGAGCAGATGATACAGTATTAGAAGATATAAATTTGCCAGGAAAATGGAAACCAAAAATGATAGGGGGAATTGGAGGTTTTATCAAAGTRAGRCAATATGATCAGATAACTATAGAAATTTGTGGAAAAAAGGCTATAGGTACAGTGTTAGTAGGACCTACACCTATCAACATAATTGGACGAAATATGTTGACTCARCTTGGTTGTACTTTAAATTTCCCAATTAGCCCTATTGACACTGTACCAGTAACATTAAAGCCAGGAATGGATGGACCAAAGGTTAAACAGTGGCCATTAACAAAAGAAAAAATAGAAGCATTA…
102506_2016_AE	~~~~~~~~~~~~~~~TGGCAACGACCCATTGTCACAGTAAAAATAGGAGGACAGATGAAAGAAGCTCTATTAGATACAGGAGCAGATGATACAGTACTAGAAGATATAAATTTGCCAGGAAAATGGAAACCAAAAATGATAGGAGGAATTGGAGGTTTTATCAAAGTAAAGCAATATGATCAGATACTTATAGAAATTTGTGGAAAAAAGGCTATAGGTACAGTGTTAGTAGGACCTACACCTGTCAACATAATTGGACGAAATATGTTGACTCAGATTGGATGTACTTTAAATCTCCCAATTAGCCCTATTGACACTGTACCAGTAACATTAAAGCCAGGAATGGATGGGCCAAAGGTTAAACAGTGGCCATTAACAGAAGAAAAGATAAAAGCATTA…
102507_2016_AE	~~~~~~~~~~~~~~~TGGCAGCGACCCCTTGTCACARTARAMATAGAAGGACAGCTAAGAGAAGCTCTATTAGATACAGGAGCAGATGATACAGTATTAGAAGATATAAATTTGCCAGGAAAATGGAAACCAAAAATGATAGGGGGAATTGGAGGTTTTATCAAGGTAAAACAATATGATCAGATACGTATARAAATTTGTGGAAAAAAGGCTATAGGTACAGTGTTAGTAGGACCYACACCTGTCAACATAATTGGACGAAATATGTTGACTCAGCTTGGTTGTACTTTAAATTTCCCAATTAGCCCTATTGAMACTRTACCAGTAAAATTAAAGCCAGGAATGGATGGACCAAAAGTTAAACAGTGGCCATTGACAGAGGAAAAAATAAAAGCATTA…
102511_2016_AE	~~~~~~~~~~~~~~~TGGCAACGACCCCTTGTCACAGTAAAAATAGAAGGACAGATGATAGAAGCTCTATTAGATACAGGAGCAGATGATACAGTATTAGAAGAAATAAATTTGCCAGGAAAATGGAARCCAAAAATGATAGGGGGAATTGGAGGTTTTATTAAGGTAAGACAATATGATCAGATACTTATAGAAATTTGTGGAAAAAGGGCTATAGGTGCAGTGTTAGTAGGACCTACACCTGTCAACATAATTGGACGAAATATGTTGACTCAGCTTGGTTGTACTTTAAATTTCCCAATTAGYCCTATTGACACTGTACCAGTAACATTAAAGCCAGGAATGGATGGACCAAAGGTTAAACARTGGCCATTAACAGAAGAAAAAATAAAAGCATTA…
102512_2016_AE	~~~~~~~~~~~~~~~TGGCAACGACCCCTTGTCACAATAAAAATAGCAGGACAGATGAAAGAAGCTCTATTAGATACAGGAGCAGATGATACAGTATTAGAAGATATAAATTTGCCAGRAAAATGGAAACCAAAAATGATAGGGGGAATTGGAGGTTTTATCAAGGTAAGRCAATATGATCAGATATCTATAGAAATTTGTGGAAAAAAGGCTACAGGTACAGTGTTAGTAGGACCTACACCTGTCAACATAATTGGAAGAAATATGTTGACTCAGCTTGGTTGTACTTTAAATTTCCCAATTAGCCCTATTGACACTGTACCAGTAACATTAAAGCCAGGAATGGATGGACCAAAGGTTAAACAGTGGCCATTRACAGAAGAAAAAATAAAAGCATTA…
102513_2016_AE	~~~~~~~~~~~~~~~TGGCAACGACCCMTTGTCACAATAAAAATAGAAGGACARMTRAGAGAGGCTCTATTAGATACAGGAGCAGATGATACAGTATTAGAAGAWATAAATTTGCCAGGAAAATGGAAACCAAAAATGATAGGGGGAATTGGAGGTTTTATCAAAGTAAGGCAATATGATCAGATACTTATAGAAATTTGTGGAAAAAAGGCTATAGGTACMGTGTTAGTAGGACCTACACCTRTCAACATAATTGGACGAAATATGTTGACTCARCTTGGTTGTACTTTAAATTTCCCAATTAGYCCTATTGACACTGTACCAGTAACATTAAAGCCAGGAATGGATGGRCCAAAGGTTAAACAGTGGCCATTAACAGAAGAAAAAATAAAAGCATTA…
102520_2016_AE	~~~~~~~~~~~~~~~TGGCAACGACCCCTTGTCTCAATAAAGATAGGAGGACAGACAAGAGAAGCTCTATTAGATACAGGAGCAGATGATACAGTATTAGAAGATATAAATTTGCCAGGAAAATGGAAACCAAAAATGATAGGGGGAATTGGAGGTTTTATCAAGGTAAGGCAATATGATCAGATAAGTATAGAAATTTGTGGAAAAAAGGCTATAGGTACAGTGCTAGTAGGACCTACACCTATCAACATAATTGGACGAAATATGTTGACTCAGCTTGGTTGTACTTTAAATTTCCCAATTAGCCCTATTGACACTGTACCAGTAAAATTAAAGCCAGGAATGGATGGACCAAAGGTTAAACAGTGGCCATTAACAGAAGAAAAAATAAAAGCATTA…
102524_2016_AE	~~~~~~~~~~~~~~~TGGCAACGACCCCTTGTCACAGTAAAAATAGAAGGACAGATAAAAGAAGCTCTATTAGATACAGGAGCAGATGATACAGTATTAGAAGATATAAATTTGCCAGGAAAATGGAAACCAAAAATGATAGGGGGAATTGGAGGTTTTATCAAAGTAARGCAATATGATCAGRTACTTATAGAAATTTGTGGAAAAAAGGCTGTAGGTACAGTGTTAGTAGGACCTACACCTGTCAACATCATTGGACGAAATATGTTGACTCAGATTGGTTGTACTTTAAATTTCCCAATTAGCCCTATTGACACTGTACCAGTAMMWTTAAAGCCAGGTATGGATGGACCAAAGGTTAAACAATGGCCATTAACAGAAGAAAAAATAAARGCATTA…
110103_2016_AE	~~~~~~~~~~~~~~~TGGCAACGACCCCTTGTCACAATAAAAATAGCAGGACAGATGAGAGAAGCTCTATTAGATACAGGAGCAGATGATACAGTATTAGAAGATATAAATTTGCCAGGAAAATGGAAACCAAAAATGATAGGGGGAATTGGAGGTTTTATCAAGGTAAGGCAATATGATCAAATACTTATAGAGATTTATGGAAAAAAGGCTATAGGTACAGTGTTAGTAGGACCTACACCTGTCAACATAATTGGACGAAATATGTTGACTCAGCTTGGGTGTACTTTAAATTTTCCAATTAGCCCTATTGACACTGTACCAGTAACATTAAAGCCAGGAATGGATGGGCCAAAGGTTAAACAGTGGCCATTAACAGAAGAAAAAATAAAAGCATTA…
110113_2016_AE	~~~~~~~~~~~~~~~TGGCAACGACCCCTTGTCACAGTAAARATAGGAGGACAGATGAARGAAGCTCTATTAGATACAGGAGCAGATGATACAGTATTAGAAGAWATAAATTTGCCAGGAAAATGGAARCCAAAAATGATAGGGGGAATTGGAGGTTTTATCAAAGTAAGGCAATATGATSAGATAMYTATAGAAATTTGTGGAAAAARGGCTATAGGTACAGTGTTAGTAGGACCTACACCTRTCAACATAATTGGACGAAATATGTTGACTCAGATTGGYTGTACTTTAAATTTYCCAATTAGTCCTATTGACACTGTACCAGTAACATTAAAGCCAGGAATGGATGGACCAAAGGTTAAACAGTGGCCATTAACAGAAGAAAAAATAARAGCATTA…
110817_2016_AE	~~~~~~~~~~~~~~~TGGCAACGACCCCTTGTCACAATAAAAGTAGGAGGACAGGTGAAAGAAGCTCTATTAGATACAGGAGCAGATGATACAGTATTAGAAGATATAAATTTGCCAGGAAAATGGAAACCAAAAATGATAGGGGGAATTGGAGGTTTTATYAAGGTAAGGCAATATGATCAGATACYTATAGAAATTTGTGGAAAAAAGGCTATAGGTACAGTRTTAGTAGGACCYACACCTGTCAACATAATTGGACGAAACATGTTGACTCAGCTTGGTTGTACTTTAAATTTCCCAATTAGCCATATTGACACTGTACCAGTAAMATTAAAGCCAGGAATGGATGGACCAAAGGTTAAACAGTGGCCATTAACAGAAGAAAAAATAAAAGCATTA…
110818_2016_AE	~~~~~~~~~~~~~~~TGGCAACGACCCCTTGTCACAGTAAAAATAGGAGGACAGATGAAAGAAGCTCTATTAGATACAGGAGCAGATGATACAGTATTTGAAGAAATAAGTTTGCCAGGAAAATGGAAACCAAAAATGATAGGGGGAATTGGAGGTTTTATCAAAGTAAGGCAATATGATCAGATAACTATAGAAATTTGTGGAAAAAAGGCTATAGGTACAGTGTTAGTAGGACCTACACCTGTCAACATAATTGGACGAAATATGTTGACTCAGGTTGGTTGTACTTTAAATTTCCCAATTAGYCCTATTGACACTGTGCCAGTAACATTAAAGCCAGGAATGGATGGACCAAAGGTTAAACAGTGGCCATTAACAGAAGAAAAAATAAAAGCATTA…
111504_2016_AE	~~~~~~~~~~~~~~~TGGCAACGACCCCTTGTCACAATAAAARTAGGAGGACAGATAAAAGAAGCTCTATTAGATACAGGAGCAGATGATACAGTATTAGAAGATATAAATTTGCCAGGAAGATGGAAACCAAAAATGATAGGGGGAATTGGAGGTTTTATCAAAGTAAGGCAATATGATCAGGTACYTATAGAAATTTGTGGGAAAAAAGCTATAGGTACAGTGTTAGTAGGACCTACACCTATCAACATAATTGGACGAAACATGTTGACTCAGCTTGGTTGTACTTTAAATTTCCCAATTAGTCCTATTAACACTGTACCAGTAAMATTAAAGCCAGGAATGGATGGRCCAAAGGTTAAACAGTGGCCATTAACAGARGAAAAAATAAAAGCATTA…
111511_2016_AE	~~~~~~~~~~~~~~~TGGCAACGACCCCTTGTCACAATAAAAATAGGAGGACAGACAAAAGAAGCTCTATTAGATACAGGAGCAGATGATACAGTRTTAGAAGATATAAATTTGCCAGGAAAATGGAAACCAAAAATGATAGGGGGAATTGGAGGTTTTATCAAGGTAAAGCAATATGATCAGATACTTATAGAAATTTGTGGAAAAAAGGCTATAGGTACAGTGCTAGTAGGACCTACACCTATCAACATAATTGGACGAAATATGTTGACTCAGCTTGGTTGTACTTTAAATTTCCCAATTAGCCCTATTGACACTGTACCAGTAAAATTAAAGCCAGGAATGGATGGACCAAAGGTTAAACAGTGGCCATTAACAGAAGAAAAAATAAAAGCACTR…
111514_2016_AE	CCTCAAATCACTCTTTGGCAACGACCCCTTGTCACAGTAAAAATAGGAGGACAGATGAAAGAAGCTCTATTAGATACAGGAGCAGATGATACAGTATTAGAAGATATAAATTTGACAGGAAAATGGAAACCAAGAATGATAGGGGGAATTGGAGGTTTTATCAAGGTAAGGCAATATGATCAGATAACTATAGAAATTTGTGGGAAAAAAGCTATAGGAACAGTGTTAGTAGGACCTACACCTGTCAACATAATTGGACGAAATATGTTGACTCAGATTGGCTGTACTTTAAATTTCCCAATTAGCCCTATTGACACTGTGCCAGTAACATTAAAGCCAGGAATGGATGGACCAAAGGTTAAACARTGGCCATTAACAGAAGAAAAAATAAAAGCATTA…
112201_2016_AE	CCTCAAATCACTCTTTGGCAACGACCCCTTGTCCCAATAAAAATAGGAGGACAGATAAAAGAAGCTCTATTAGATACAGGAGCAGATGATACAGTATTAGAAGATATAAATTTGCCAGGAAAATGGAAACCAAAAATGATAGGGGGAATTGGAGGTTTTATCAAGGTAAGGCAATATGATCAGATAGTTATAGAAATTTGTGGAAAAAAGGCTATAGGTACAGTGTTAGTAGGACCTACACCTATCAACATAATTGGACGRAATATGTTGACTCAGCTTGGTTGTACTTTAAATTTCCCAATTAGCCCTATTGACACTGTACCARTAAAATTAAAGCCAGGAATGGATGGACCAAAGGTTAAACAGTGGCCATTAACAGAAGAAAAAATCAAAGCGTTA…
112205_2016_AE	~~~~~~~~~~~~~~~TGGCAACGACCCCTTGTCACAATAAAAGTAGGAGGGCAAATAAAAGAAGCTCTATTAGATACAGGAGCAGATGATACAGTATTAGAAGATATAAATCTGCCAGGAAAATGGAAACCAAAAATGATAGGGGGAATTGGAGGTTTTATCAAGGTAAGACAATATGATCAGATACTTATAGAAATTTGTGGGAAAAAGGCTATAGGTACAGTGCTGGTAGGACCTACACCTATCAACATAATTGGACGAAATATGTTGACTCAGCTTGGTTGTACTTTAAATTTCCCAATTAGTCCTATTGACACTGTACCAGTAACATTAAAGCCAGGAATGGATGGACCAAAGGTTAAACAGTGGCCATTAACAGAAGAAAAAATAAAAGCATTA…
112206_2016_AE	~~~~~~~~~~~~~~~TGGCAACGACCCCTTGTCACAGTAAARATAGCAGGACAGATRAAAGAAGCTCTATTAGATACAGGAGCAGATGATACAGTATTAGAAGAAATAAATTTGCCAGGAAAATGGAAACCAAAAATGATAGGGGGAATTGGAGGTTTTATCAAGGTAAGGCAATATGATCAGATACCTATAGAAATTTGTGGAAAAAAGGCTATAGGTACAGTGTTAGTAGGACCTACACCTATCAACATAATTGGACGAAATATGTTGACTCAGCTTGGYTGTACTTTAAATTTCCCAATTAGCCCTATTGACACTGTACCAGTAACATTAAAGCCAGGAATGGATGGACCAAAGGTTAAACAGTGGCCATTAACAGAAGAAAAAATAAAAGCATTA…
112208_2016_AE	~~~~~~~~~~~~~~~TGGCAGCGACCCCTTGTCACAATAGAAATAGAAGGACAGCTAAGAGAAGCTCTATTAGATACAGGAGCAGATGATACAGTATTAGAAGATATAAATTTGCCAGGAAAATGGAAACCAAAAATGATAGGGGGAATTGGAGGTTTTATCAAGGTAAAACAATATGATCAGATACTTATAAAAATTTGTGGAAAAAAGGCTATAGGTACAGTGTTAGTAGGACCTACACCTGTCAACATAATTGGACGAAATATGTTGACTCAGCTTGGTTGTACTTTAAATTTCCCAATTAGCCCTATTGACACTGTACCAGTAAAATTAAAGCCAGGAATGGATGGACCAAAAGTTAAACAGTGGCCATTGACAGAGGAAAAAATAAAAGCATTA…
112212_2016_AE	~~~~~~~~~~~~~~~TGGCAACGACCCCTTGTCCCAATAAAAATAGGAAGACAGATAAAAGAAGCTCTATTAGATACAGGAGCAGATGATACAGTATTAGAAGAYATAAATTTGCCAGGAAAATGGAAACCAAAAATGATAGGGGGAATTGGAGGCTTTATCAAAGTAAGGCAATATGATCAGATACCTATAGAAATTTGTGGAAAAAAGGCTATAGGTACAGTGTTAGTAGGACCTACACCTATCAACATAATTGGACGAAACATGTTGACTCAGCTTGGTTGTACTTTAAATTTTCCAATTAGCCCTATTGACACTGTACCAGTAACATTAAAGCCAGGAATGGATGGACCAAARGTTAAACAGTGGCCATTAACAGAAGAAAAAATAAAAGCATTA…
112215_2016_AE	~~~~~~~~~~~~~~~TGGCAACGACCCCTTGTCCCAATAAAAATAGGAGGACAGATGAAAGAAGCTCTATTGGATACAGGAGCAGATGATACAGTATTAGAAGATATAAATTTGCCAGGGAAATGGAAACCAAAAATGATAGGGGGAATTGGAGGTTTTATCAAGGTAAGGCAATATGATCAGATATCAATAGAAATTTGTGGAAAAAAGGCTATAGGTTCAGTGTTAGTAGGACCTACACCTGTCAACATAATTGGACGAAATATGTTGACTCAGCTTGGTTGTACATTAAATTTCCCAATTAGTCCTATTGACACTGTACCAGTAACATTAAAGCCAGGAATGGATGGACCAAAGGTTAAACAGTGGCCATTAACAGAAGAAAAAATAAAAGCATTA…
112216_2016_AE	~~~~~~~~~~~~~~~TGGCAACGACCCCTTGTCACAGTAAAAATAGGAGGACAGATGAGAGAAGCTCTATTAGATACAGGAGCAGATGATACAGTATTAGAAGATATAAATTTGCCAGGAAAATGGAAACCAAAAATGATAGGGGGAATTGGAGGTTTTATCAAGGTAAGACAATATGATCAAATACTTATAGAAATTTGTGGAAAAAAGGCTATAGGTACAGTGTTAGTAGGACCTACACCTATCAACATAATTGGACGAAATATGTTGACTCAGCTTGGTTGTACTTTAAATTTCCCAATTAGTCCTATTGACACTGTACCAGTAAAATTAAAGCCAGGAATGGATGGACCAAAGGTTAAACAGTGGCCATTAACAGAAGAAAAAATAAAAGCATTA…
302966_2016_AE	cctcaaatcactctttggcaacgaccccttgtctcagtaaaaataggaggacagataaaagaagctctattagatacaggagcagatgatacagtattagaagaaataaatttgccaggaaaatggaaaccaaaaatgatagggggaattggaggttttatcaaggtaagacaatatgatcaggtacttatagaaatttgtgggaaaaaagctataggttcagtgttagtaggacctacacctgtcaacataattggaaggaatatgttgactcagattggttgtactttaaatttcccaattagccctattgacactgtaccagtaaaattaaagccaggaatggatggaccaaaggttaggcagtggccattaacagaagaaaaaataaaagcatta…
112219_2016_AE	~~~~~~~~~~~~~~~TGGCAACGACCCCTTGTCACAGTAAAGATAGGAGGACAGATGAAAGAAGCTCTGTTAGATACAGGAGCAGATGATACAGTATTAGAAGAGATAAATTTGCCAGGAAAATGGAAACCAAAAATGATAGGGGGAATTGGAGGTTTTATCAAGGTAAGACAATATGATCAGATACTTATAGAAATTTGTGGGAAAAAAGCTATAGGTACAGTGTTAGTAGGACCTACACCTGTCAACATAATTGGACGAAATATGTTGACTCAGATTGGTTGTACTTTAAATTTCCCAATTAGCCCTATTGACACTGTACCAGTAACATTAAAGCCAGGAATGGATGGACCAAAGATTAAACAGTGGCCATTAACAGAAGAAAAAATAAAAGCATTA…
112905_2016_AE	~~~~~~~~~~~~~~~TGGCAACGACCCCTTGTCYCAATAARARTAGGAGGACAGATAAAAGAAGCTCTATTAGATACAGGAGCAGATGATACAGTATTAGAAGATATAAATTTGCCAGGAARATGGAAACCAAAAATGATAGGGGGAATTGGAGGTTTTATCAARGTAAAGCAATATGATCAGATACYTATAGAAATTTGTGGAAAAAAGGCTATAGGTACAGTGTTAGTAGGACCTACACCTRTCAACATAATTGGACGAAATATGTTGACTCAGCTTGGTTGTACTTTAAATTTCCCAATTAGYCCTATTGACACTGTACCAGTAACATTAAAGCCAGGAATGGATGGRCCAAAGGTTAAACAGTGGCCATTRACAGAAGAAAAAATAAAAGCACTA…
112914_2016_AE	~~~~~~~~~~~~~~~TGGCAACGACCCMTTGTCACAGTAAAAGTAGGAGGACAGATGAAAGAAGCTCTATTAGATACMGGAGCAGATGATACAGTCTTAGAAGATATAAATTTGCCAGGGAAATGGAAACCAAAAATGATAGGRGGAATTGGAGGTTTTATYAAGGTAAGGCAATATGATCAGATACTTATAGAAATTTGTGGGAAAAAAGCTATAGGTACAGKGTTAGTAGGACCTACACCTGTCAACATAATTGGACGAAATATGTTGACTCAGATTGGTTGTACTTTAAATCTCCCAATTAGCCCTATTGACACTGTACCGGTAGCATTAAAGCCAGGAATGGATGGACCAAAGGTTAAACAGTGGCCATTAACAGAAGAAAAAATAAAAGCATTA…
112916_2016_AE	~~~~~~~~~~~~~~~TGGCAACGACCCCTTGTCCCAATAAAAATAGGAGGACARATGAGAGAAGCTCTRTTAGATACAGGAGCAGATGATACAGTATTAGAAGATATAAATTTGCCAGGAAAATGGAAACCAAAAATGATAGGGGGAATTGGRGGTTTTATCAARGTAAGGCAATATGATCAGATAWCTATAGAAATTTGTGGKAAAAAGGCTATAGGTACAGTGTTAGTAGGACCTACACCTATCAACATAATTGGRCGAAATATGTTGACTCAGCTTGGTTGTACTTTAAATTTCCCAATWAGCCCTATTGACACTGTACCAGTAAAATTAAAGCCAGGAATGGATGGACCAAAGGTTAAACAGTGGCCATTAACAGAAGARAARATAAAAGCATTA…
120601_2016_AE	~~~~~~~~~~~~~~~TGGCAACGACCCCTTGTTACAATAAAAATAGGAGGACAGACAAAAGAAGCTCTATTAGATACAGGAGCAGATGATACAGTATTAGAAGATATAAATTTGCCAGGAAAATGGAAACCAAAAATGATAGGGGGAATTGGAGGTTTTATCAARGTAAAGCAATATGATCAGATACTTATAGAAATTTGTGGAAAAAAGGCTATAGGTACAGTGTTAGTAGGACCTACMCCTATCAACATAATTGGACGAAATATGTTGACTCAGCTTGGTTGTACTTTAAATTTCCCAATTAGCCCTATTGACACTGTACCAGTAAAATTAAAGCCAGGAATGGATGGRCCAAAGGTTAAACAGTGGCCATTAACAGAAGAAAAAATAAAAGCACTA…
120602_2016_AE	~~~~~~~~~~~~~~~TGGCAACGACCCMTTGTCACAGTAAAAATAGGAGGACAGATAAAAGAAGCTCTRTTAGATACAGGAGCAGATGATACAGTATTAGAAGATATAAATTTGCCAGGAAAATGGAAACCAAAAATGATAGGGGGAATTGGAGGTTTTATCAAAGTAAGGCAATATGATCAGATACTTATAGAAATTTGTGGGAAAAAGGCTATAGGTACAGTGTTAGTAGGACCTACACCTGTCAACATAATTGGACGAAATATGTTGACTCAGATTGGTTGTACTTTAAATYTCCCAATTAGTCCTATTGACACTGTGCCAGTAACATTAAAACCAGGAATGGATGGACCAAAGGTTAAACAGTGGCCATTAACAAAAGAAAAAATAGAAGCATTA…
120603_2016_AE	~~~~~~~~~~~~~~~TGGCAACGACCCCTTGTCACAATAAAAATAGGAGGACAGATAAAAGAAGCTCTATTAGACACAGGAGCAGATGATACAGTATTAGAAGATATAAATTTGCCAGGAAAATGGAAACCAAAAATGATAGGGGGAATTGGAGGTTTTATCAAAGTAAGGCAATATGATCAGATAACTATAGAAATTTGTGGRAAAAAGGCTATAGGTACAGTGTTAGTAGGACCTACACCTATCAACATAATTGGACGAAATATGTTGACTCAGCTTGGTTGTACTTTAAATTTCCCAATTAGCCCTATTGACACTGTACCAGTAAAATTAAARCCAGGAATGGATGGACCAAAGGTTAAACAGTGGCCATTAACAGAAGAAAAAATAAAAGCATTA…
120605_2016_AE	~~~~~~~~~~~~~~~TGGCAACGACCCGTTGTCACAATAAGGATAGAAGGACAGCTGAAGGAAGCTTTATTAGATACAGGAGCAGATGATACAGTATTAGAAGAAATAACTTTGCCAGGAAAATGGAAACCAAAAATGATAGGGGGAATTGGAGGTTTTATCAAAGTAAGGCAATATGATCAGATACTTATAGAAATTTGTGGAAAAAAGGCTATAGGTACAGTGTTAGTAGGACCTACACCTGTCAACATAATTGGACGAAATATGTTGACTCAGCTTGGTTGTACCTTAAATTTCCCAATTAGCCCTATTGACACTGTACCAGTAAAATTAAAGCCAGGAATGGATGGACCAAAGGTTAAACAATGGCCATTAACAGAAGAAAAAATAAAAGCATTA…
120611_2016_AE	~~~~~~~~~~~~~~~TGGCAACGACCCCTTGTCACAGTAAAAATAGAAGGACAGGTGAAAGAAGCTCTATTAGATACAGGAGCAGATGATACGGTATTAGAAGAAATAAATTTGCCAGGAAAATGGAAACCAAAAATGATAGGGGGAATTGGAGGTTTTATCAAAGTAAGGCAATATGATCAGATACTTATAGAAATTTGTGGAAAAAAGGCTATAGGTACAGTGTTAGTAGGACCCACACCTGTCAACATAATTGGACGAAATATGTTGACTCAGATTGGTTGTACTTTAAATTTCCCAATTAGCCCTATTGACACTGTACCAGTAACATTAAAGCCAGGAATGGATGGACCAAAGGTTAAACAGTGGCCATTAACAGAAGAAAAGATAAAAGCATTA…
120612_2016_AE	~~~~~~~~~~~~~~~TGGCAGCGACCCCTTGTCCCAATAAAAATAGGAGGACAGATAAAAGAAGCTCTATTAGATACAGGAGCAGATGATACAGTATTAGAAGATATAAATTTGCCAGGAAAATGGAAACCAAAAATGATAGGGGGAATTGGAGGTTTTATCAAGGTAAGGCAATATGATCAGATAATTATAGAAATTTGTGGAAAAAGGGCTATAGGTACAGTGTTAGTAGGACCTACACCTATCAACATAATTGGACGAAATATGTTGACTCAGCTTGGTTGTACTTTAAATTTCCCAATTAGCCCTATTGACACTGTACCAGTAAAATTAAAGCCAGGAATGGATGGACCAAAGGTTAAACAGTGGCCATTAACAGAAGAAAAAATCAAAGCATTA…
120619_2016_AE	~~~~~~~~~~~~~~~TGGCAACGACCYCTYGTCaCAGTAAAARTAGGAGGACAGATRATAGAAGCTCTRTTAGATACAGGRGCAGATGATACAGTATTAGAAGATATAAATTTGCCAGGAAAATGGAAACCAAAAATGATAGGGGGAATTGGRGGTTTTATCAARGTMAGGCAATATGATCARATACTTATAGAAATTTGTGGGAAAAAAGCTATAGGTACAGTGTTAGTAGGACCTACACCTATCAACATAATTGGACGAAATATGTTGACTCAGATKGGTTGTACTYTAAATTTYCCAATTAGCCCTATTGACACTGTACCAGTAAMATTAAAGCCAGGAATGGATGGRCCAAAGGTTAAACAGTGGCCATTAACAGAAGAAAAAATAAAAGCATTA…
120622_2016_AE	~~~~~~~~~~~~~~~TGGCAACGACCCCTTGTCACAATAAAAATAGGAGGACAGRTGAGAGAAGCTCTATTAGATACAGGAGCAGATGATACAGTATTAGAAGAGATAAATTTGCCAGGAAAATGGAAACCAAAAATGATAGGGGGAATWGGAGGTTTTATCAAGGTAAAGCAATATGATCAGATACYTATAGAAATTTGTGGAAAAAGGGCTATAGGTACAGTGTTAGTAGGACCCACACCTATCAACATAATTGGACGRAATATGTTGACTCAGCTTGGTTGTACTTTAAATTTCCCAATTAGTCCTATTGACACTGTACCAGTAAARTTAAAGCCAGGAATGGATGGACCAAARGTTAAACAGTGGCCATTAACAGAAGAAAAAATAAAGGCACTA…
121301_2016_AE	~~~~~~~~~~~~~~~TGGCAACGACCCCTTGTCACAGTAAAAATAGGAGGACAGATGAGAGAAGCYCTATTAGATACAGGAGCAGATGATACAGTATTAGAAGAAATAAATTTGCCAGGAARATGGAARCCAAAAATGATAGGGGGAATTGGAGGTTTTATCAARGTAAGGCAATATGATCASATACTTATAGAAATTTGTGGAAAAAAGGCTATAGGTACAGTGTTRGTAGGACCTACRCCTGTCAACATAATTGGACGAAAYATGTTGACTCAGATTGGTTGTACTTTAAATTTCCCAATTAGYCCTATTGACACTGTACCAGTAACATTRAAGCCAGGAATGGAKGGACCAAAGGTTAAACARTGGCCATTRACAGAAGAAAAAATAAAAGCATTA…
121302_2016_AE	~~~~~~~~~~~~~~~TGGCAACGACCCCTTGTCACAGTAAAAATAGGAGGACAGATGAGAGAAGCTCTATTAGATACAGGAGCAGATGATACAGTATTAGAAGATATAAATTTGCCAGGAAAATGGAAACCAAAAATGATAGGGGGAATTGGAGGTTTTATCAAGGTAAGACAATATGATCAGATACCTATAGAAATTTGTGGGAAAAAAGCTATAGGTACAGTGTTAGTAGGACCTACACCTGTCAACATAATTGGACGAAATATGTTGACTCAGCTTGGTTGTACTTTAAATTTTCCAATTAGCCCTATTGACACTGTACCAGTAACATTAAAGCCAGGAATGGATGGACCAAAGGTTAAACAATGGCCATTAACAGAAGAAAAAATAAAAGCATTA…
121304_2016_AE	~~~~~~~~~~~~~~~TGGCAACGACCCCTTGTCACAATAAAAATAGAAGGACAGATAAAAGAAGCTCTATTAGATACAGGAGCAGATGATACAGTATTAGAAGATATAAATTTGCCAGGAAAATGGAAGCCAAAAATGATAGGGGGAATTGGGGGTTTTATCAAGGTAAAGCAATATGATCAGATACTTATAGAAATTTGTGGAAAAAAGGCTATAGGTACAGTGTTAGTAGGACCTACGCCTGTCAACATAATTGGACGAAATATGTTGACTCAGCTTGGATGTACTTTAAATTTCCCAATTAGCCCTATTGACACTGTACCAGTAACATTAAAACCAGGAATGGATGGACCCAAGATTAAACAGTGGCCATTAACAGAAGAAAAGATAAAAGCACTA…
121306_2016_AE	~~~~~~~~~~~~~~~TGGCAACGACCCGTTGTCACAGTAAAAATAGAAGGACAGATaAAAGAAGCTCTATTAGATACAGGAGCRGATGATACAGTATTAGAAGATATAAATTTGCCAGGAAAATGGAAACCAAAAATGATAGGGGGAATTGGAGGWTTTATCAAGGTAAAGCAATATGATCAGATACTTATAGAAATTTGTGGAAAAAGGGCTGTAGGTACAGTGTTAGTAGGACCTACACCTGTCAACATAATTGGACGAAATATGTTGACTCAGATTGGTTGTACTTTAAATTTTCCAATTAGTCCTATTGACACTGTACCAGTAACATTAAAACCAGGAATGGATGGACCMAAAGTTAAACAGTGGCCATTAACAGAAGAAAAAATAAAAGCATTA…
121307_2016_AE	~~~~~~~~~~~~~~~TGGCAGCGACCCCTTGTCGCAATAAAAGTAGGAGGACAGRTGAGAGAAGCTCTATTAGATACAGGAGCAGATGATACAGTATTAGAAGATATAAATTTGTCAGGAAAATGGAAACCAAGAATGATAGGGGGAATTGGAGGTTTTATCAAGGTAAGGCAATATGATCAGATAACTATAGAAATTTGTGGAAAAAAGGCTATAGGTACAGTGTTAGTAGGACCTACACCTATCAACATAATTGGACGAAATATGTTGACTCAGCTTGGTTGTACTTTAAATTTCCCAATTAGCCCTATTGACACTGTACCAGTAACATTAAAGCCAGGAATGGATGGACCAAAGGTTAAACAATGGCCATTAACAGCAGAAAAAATAAAAGCATTA…
121311_2016_AE	~~~~~~~~~~~~~~~TGGCAACGACCCCTTGTCACAGTAAAAGTAGGGGGACAGATGAGAGAAGCTCTATTAGATACAGGAGCAGATGATACAGTATTAGAAGATATAAATTTGCCAGGAAAATGGAAACCAAAAATGATAGGGGGAATTGGAGGTTTTATCAAAGTAAGGCAATATGATCAGATACTTATAGAAATTTGTGGAAAAAAGGCTATAGGTACAGTGTTAGTAGGACCTACACCTATCAACATAATTGGACGAAATATGTTGACTCAGCTTGGTTGTACTTTAAATTTCCCAATTAGCCCTATTGACACTGTACCAGTAGCATTAAAGCCAGGAATGGATGGACCAAAGGTTAAACAGTGGCCATTAACAGAAGAAAAAATAAAAGCATTA…
121314_2016_AE	~~~~~~~~~~~~~~~TGGCAACGACCCCTTGTCACAATAAAAATAGGAGGACAGATRAGAGAAGCTCTATTAGATACAGGAGCAGATGATACAGTATTAGAAGATATAGATTTGCCAGGAAAATGGAAACCAARAATGATAGGGGGAATTGGAGGTTTTATCAARGTAAGGCAATATGATCAGRTASCYATAGAAATTTRTGGAAAAAAGGCTATAGGTACAGTGTTAGTAGGACCTACACCTGTCAACATAATYGGACGAAATMTGTTGACTCAGCTTGGTTGTACTTTAAATTTCCCAATYAGCCCTATTGACACTGTACCAGTAACATTAAAGCCAGGAATGGATGGACCAAARGTTAAACAGTGGCCATTAACAGAAGAAAAAATAAAAGCATTA…
121321_2016_AE	~~~~~~~~~~~~~~~TGGCAACGACCTGTTGTCACAGTAAAAATAGAAGGACAGATAAAAGAAGCTCTATTAGACACAGGAGCAGATGATACAGTATTAGAAGATATAAATTTACCAGGAAAATGGAAACCAAAAATGATAGGGGGAATTGGRGGTTTTATCAAGGTAAGGCAATATGATCAGATACTTATAGAAATTTGTGGAAAAARGGCTATAGGTACAGTGTTAGTAGGACCTACACCTGTCAACATAATTGGACGAAATATGTTGACTCAGATTGGTTGTACTTTAAATTTCCCAATTAGCCCTATTGAAACTGTACCAGTAAAATTAAAGCCAGGAATGGATGGACCAAAGGTTAAACAGTGGCCATTAACAGAAGAAAAAATAAAAGCATTA…
121322_2016_AE	~~~~~~~~~~~~~~~TGGCAACGACCTGTTGTCACAGTAAAAATAGAAGGACAGATAAAAGAAGCTCTATTAGACACAGGAGCAGATGATACAGTATTAGAAGATATAAATTTGCCAGGAAAATGGAAACCAAAAATGATAGGGGGAATTGGAGGTTTTATCAAGGTAAAACAATATGATCAGATACTTATAGAGATTTGTGGAAAAAGGGCTATAGGTACAGTGTTAGTAGGGCCTACACCTGTCAACATAATTGGACGAAATATGTTGACTCAGATTGGCTGTACTTTAAATTTCCCAATTAGCCCTATTGAAACTGTACCAGTAAAATTAAAGCCAGGAATGGATGGACCAAAGGTTAAACAGTGGCCATTAACAGAAGAAAAAATAAAAGCATTA…
122001_2016_AE	~~~~~~~~~~~~~~~TGGCAGCGACCCCTCGTTACAATAAAAATAGAAGGACAGCTAAAAGAAGCTCTATTAGACACAGGAGCAGATGATACAGTACTAGAAGATATAaATTTGCCAGGAAAATGGAAACCAAAAATGATAGGGGGAATTGGAGGTTTTATCAAAGTAAGGCAATATGATCAGATACTTATGGAAATTTGTGGAAAAAGGGCTATAGGAACAGTGTTAGTAGGACCTACACCTGTCAACATAATTGGACGAAATATGTTGACTCARATTGGTTGTACTTTAAACTTCCCAATTAGTCCTATTGACACTGTACCAGTAACATTAAAGCCAGGAATGGATGGACCAAAGGTTAAACAGTGGCCATTGACAGAAGAAAAGATAAAAGCATTA…
303216_2017_AE	~~~~~~~~~~~~~~~TGGCAACGACCCCTTGTCACAATAAAAATAGAAGGACAGATGAAAGAAGCTCTATTAGATACAGGAGCAGATGATACAGTATTAGAGGATATAAATTTGCCAGGAAAATGGAAACCAAAAATGATAGGGGGAATTGGAGGTTTTATCAAAGTAAGGCAATATGATCAGATAGTTATAGAAATTTGTGGAAAAAGGGCTATAGGTACAGTGTTAGTAGGACCTACACCTGTCAACATAATTGGACGAAATATGTTGACTCAGATTGGTTGTACTTTAAATTTCCCAATTAGCCCTATTGACACTGTACCAGTAACATTAAAGCCAGGAATGGATGGACCAAAGGTTAAACAATGGCCATTAACAGAAGAAAAAATAAAAGCATTA…
122007_2016_AE	~~~~~~~~~~~~~~~TGGCAACGACCCCTTGTCACAATAAAAATAGCAGGACAGATGAAAGAAGCTCTATTAGATACAGGAGCAGATGATACAGTATTAGAAGATATAAATTTGCCAGGAAAATGGAAACCAAAAATGATAGGGGGAATTGGAGGTTTTATCAAGGTAAGGCAATATGATCAGATATCTATAGAAATTTGTGGAAAAAGGGCTACAGGTACAGTGTTAGTAGGACCTACACCTGTCAACATAATTGGAAGAAATATGTTGACTCAGCTTGGTTGTACTTTAAATTTCCCAATTAGCCCTATTGACACTGTACCAGTAACATTAAAGCCAGGAATGGATGGACCAAAGGTTAAACAGTGGCCATTAACAGAAGAAAAAATAAAAGCATTA…
122011_2016_AE	cctcaaatcactctttggcaacgacccmttgtcacartaaaaataggaggacagatraargaagctctattagatacaggagcagatgatacagtattagaagatataaatttgccaggaaaatggaagccaaaaatgatagggggaattggaggttttatcaaggtaaggcartatgatcagatacccatagaaatttgtggaaaaaggrctataggtacagtgttagtaggacctacacctgtcaacataattggacgaaatatattgactcasmttggttgtactttaaatttyccaattagccctattgacactgtaccagtaaaattaaagccaggaatggatggaccaaaggttaaacagtggccattaacagaagaaaarataaaagcatta…
122015_2016_AE	~~~~~~~~~~~~~~~TGGCAACGACCCCTTGTCACAGTAAAAWTAGRAGGACAGATGATAGAAGCYCTRTTAGATACAGGAGCAGATGATACAGTATTAGAAGATATAAATTTGCCAGGAAAATGGAAACCAAAAATGATAGGGGGAATTGGAGGTTTTATCAAGGTAAGGCAATATGATCAGATAACTATGGAAATTTGTGGAAAAAAGGCTATAGGTACAGTGTTAGTAGGACCTACACCTGTCAACATAATTGGACGAAATATGTTRACTCAGATTGGTTGTACTTTAAATTTCCCAATTAGCCCTATTGACACTGTACCAGTAAAATTAAAGCCAGGAATGGATGGACCAAAGRTTAAACAGTGGCCATTAACAGAAGAAAAAATAAGAGCATTA…
122016_2016_AE	~~~~~~~~~~~~~~~TGGCAACGACCCCTYGTCTCAATAAAAGTAGGAGGACAGATAAAAGAAGCTCTATTAGATACAGGAGCAGATGATACAGTATTAGAAGATATAAATTTGCCAGGAAAATGGAAACCAAAAATGATAGGGGGAATTGGAGGTTTTATCAAGGTAAGGCAATATGATCAGATATCTATAGAAATTTGTGGAAAAAAGGCCATAGGTACAGTGTTAGTAGGACCTACACCTATCAACATAATTGGACGAAATATGTTGACTCAGCTTGGTTGTACTYTAAATTTCCCAATTAGCCCTATTGACACTGTACCAGTAAAATTAAAGCCAGGAATGGATGGACCAAAGGTTAAACAGTGGCCATTAACAGARGARAAAATAAAAGCATTA…
122018_2016_AE	~~~~~~~~~~~~~~~TGGCAACGACCCCTTGTCACAATAAAAATAGAAGGACAGATGAAAGAAGCTCTATTAGATACAGGAGCAGATGATACAGTATTAGAAGATATAAATTTGCCAGGAAAATGGAAACCAAAAATGATAGGGGGAATTGGAGGTTTTATCAAAGTAAGGCAATATGATCARATAGTTATAGAAATTTGTGGAAAAAGGGCTATAGGTACAGTGTTAGTAGGACCTACACCTGTCAACATAATTGGACGAAATATGTTGACTCAGATTGGTTGTACTTTAAATTTCCCAATTAGCCCTATTGACACTGTACCAGTAACATTAAAGCCAGGAATGGATGGACCAAAGGTTAAACAATGGCCATTAACAGAAGAAAAAATAAAAGCATTA…
122701_2016_AE	~~~~~~~~~~~~~~~TGGCAACGACCCCTTGTCACAGTAAAAATAGRAGGACAGATGAWAGARGCTCTATTAGATACAGGRGCAGATGATACAGTATTAGAAGATATAAATTTGCCAGGAAAATGGAAACCAAAAATGATAGGGGGAATTGGAGGTTTTATTAARGTAARGCAATATGATCAGATACTTATAGAAATTTGTGGAAAAAGGGCTATAGGTACAGTGTTAGTAGGACCYACACCTGTCAACATAATTGGRCGAAATATGTTGACTCAGATTGGTTGTACTTTAAATTTCCCAATTAGCCCTATTGACACTGTACCAGTAAMATTAAAGYCAGGAATGGATGGACCAAARGTTAAACAGTGGCCATTAACAGAAGAAAAAATAAAAGCATTA…
122703_2016_AE	~~~~~~~~~~~~~~~TGGCAACGACCCCTTGTCACARTAAAAATAGGAGGACAGATAAAAGAAGCTCTATTAGATACAGGGGCAGATGATACAGTATTAGAAGATATAAATTTGCCAGGAAAATGGAAGCCAAAAATGATAGGGGGAATTGGAGGTTTTATCAAAGTAAGGCAATATGATCAGATATCTATAGAAATTTGTGGAAAAAGGGCYATAGGTACAGTGTTAATAGGACCTACACCTGTCAACATAATTGGACGAAATATGTTGACTCAGMTTGGTTGTACTTTAAATTTCCCAATTAGCCCTATTGACCCTGTRCCAGTAACATTAAAGCCAGGAATGGATGGACCAAAGGTTAAACAGTGGCCATTAACAGAAGAAAAAATAAAAGCATTA…
122707_2016_AE	~~~~~~~~~~~~~~~TGGCAACGACCCATTGTCTCAGTAAAAGTAGGAGGACAAATAAAAGAAGCTCTATTAGACACAGGAGCAGATGATACAGTATTAGRAGATATAAATTTGCCAGGAAAATGGAAACCAAAAATGATAGGGGGAATTGGAGGTTTTATCAAGGTAAAGCAATATGATCAGATACTTATAGAAATTTGTGGAAAAAAGGCTGTAGGTACAGTATTAGTAGGACCTACACCTGTCAACATAATTGGACGAAATATGTTGACTCAGATTGGTTGTACTTTAAATCTCCCAATTAGCCCTATTGACACTGTACCAGTAACATTAAAGCCAGGAATGGATGGACCAAAGGTTAAACAGTGGCCACTAACAGAAGAAAAAATAAAAGCATTA…
122708_2016_AE	CCTCAAATCACTCTTTGGCAACGACCCCTTGTCACAGTRAAAATAGGAGGACAGATGAAAGAAGCTCTATTAGATACAGGAGCAGATGATACAGTATTAGAAGATATAAATTTGACAGGAAAATGGAAACCAAGAATGATAGGGGGAATTGGAGGTTTTATCAAGGTAAGGCAATATGATCAGATAACTATAGAAATTTGTGGGAAAAAAGCTATAGGAACAGTGTTAGTAGGACCTACACCTGTCAACATAATTGGACGAAATATGTTGACTCAGATTGGCTGTACTTTAAATTTCCCAATTAGCCCTATTGACACTGTGCCAGTAACATTAAAGCCAGGAATGGATGGACCAAAGGTTAAACAGTGGCCATTAACAGAAGAAAAAATAAAAGCATTA…
122710_2016_AE	~~~~~~~~~~~~~~~TGGCAACGACCCCTTGTCACAATAAAAATAGAAGGACAGATGAGAGARGCTCTATTAGATACAGGAGCAGATGATACAGTATTAGAAGATATAAATTTGCCAGGAAAATGGAAACCAAAAATGATAGGGGGAATTGGAGGTTTTATCAARGTAAGGCAATATGATCAGATACTTATAGAAATTTGTGGAAAAAAGGCTRTAGGTACAGTGTTAgTAGGACCTACACCTGTCAACATAATTGGACGAAATATGTTGACTCAGCTTGGTTGTACTTTAAATTTCCCAATTAGCCCTATTGACACTGTACCAGTAACATTAAAGCCAGGWATGGATGGACCAAAGGTTAAACAGTGGCCATTAACAGAAGAAAAAATAAAAGCMTTA…
122712_2016_AE	~~~~~~~~~~~~~~~TGGCAACGACCCCTTGTCACAATAAAAATAGGAGGACAGCTRAAAGAAGCTCTATTAGATACAGGAGCAGATGATACAGTATTAGAAGATATAAATTTGCCAGGAAAATGGAAACCAAAAATGATAGGGGGAATTGGAGGTTTTATCAAGGTAARRCAWTATGATSAGRTACYTATAGAAATTTGTGGRAAAAAGGCTATAGGTACAGTGTTAGTAGGACCTACACCTGTCAACATAATTGGACGAAATATGTTGACTCAGATTGGTTGTACTTTAAATTTCCCAATTAGCMCTATTGACACTATACCAGTAACATTAAAGCCAGGAATGGATGGACCAAGRGTTAAACAGTGGCCATTAACAGAAGAAAAAATAAAAGCATTA…
302527_2016_AE	cctcaaatcactctttggcaacgaccccttgtcacaataaaaataggaggacagatgaaagaagctctattagatacaggagcagatgatacagtattrgaagatataaatttgccaggaaaatggaaaccaaaaatgatagggggaattggaggttttatcaaggtaaggcaatatgatcaggtacctatagaaatttgtggaaaaaaggctataggtacagtgttagtaggacctacacctatcaacataattggacgaaatatgttgactcagcttggttgtactttaaatttcccaattagccctattgacactgtaccagtaacattaaagccaggaatggatggaccaaaggttaaacaatggccattaacagaagaaaaaataaaagcatta…
302546_2016_AE	cctcaaatcactctttggcaacgaccccttgtcacagtaaaagtagggggacagatgagagaagctctattagatacaggagcagatgatacagtattagaagatataaatttgccaggaaaatggaaaccaaaaatgatagggggaattggaggttttatcaaagtaaggcaatatgatcagatacttatagaaatttgtggaaaaarggctataggtacagtgttagtaggacctacacctatcaacataattggacgaaatatgttgactcagcttggttgtactttaaatttcccaattagccctattgacactgtaccagtagcattaaagccaggaatggatggaccaaaggttaaacagtggccattaacagaagaaaaaataaaagcatta…
302550_2016_AE	cctcaaatcactctttggcaacgaccccttgtcacagtaaaaataggaggacagatgaaagaagctctattagatacaggagcagatgatacagtattagaagayataaatttgccaggaaaatggaaaccaaaaatgatagggggaattggaggttttatcaaagtaaggcaatatgatcagatacttatagaaatttgtggaaaaaaggctataggtacagtgttagtaggacctacacctgtcaacataattggacgaaatatgttgactcagattggttgtactttaaatttcccaattagycctattgamactgtaccagtaacattaaagccaggaatggatggaccaaaggttaaacagtggccattracagaagaaaaaataaaagcatta…
302572_2016_AE	cctcaaatcactctttggcaacgaccccttgtcccagtaaaaataggaggacaggtaagagaagctttattagatacaggagcagatgatacagtattagaagatataaatttgccaggaaaatggaaaccaaaa~tgatagggggaattggaggttttatcaaggtaaggcaatatgatcaggtatctatagaaatttgtggaaaaagggctataggtacagtgttagtaggacctacacctatcaacataattggacgaaatatgttaactcagattggttgtactttaaatttcccaattagccctattgacactgtaccagtaaaattaaagccaggaatggatggaccaaaggttaaacagtggccattaacagaagaaaaaataaaagcatta…
302579_2016_AE	cctcaaatcactctttggcaacgacccattgtcacagtaaaaatagaggggcagatgatagaagctctattagatacaggagcagatgatacagtatgagaagatataaatttgccaggaaaatggaaaccaaaaatgatagggggaattggaggttttatcaaggtaaggcaatatgatcagatacttatagaaatttgtggaaaaagagctataggtacagtgttagtaggacctacacctgtcaacataattggacggaatatgttgactcagattggttgtactttaaatctcccaattagccctattgacactgtacccgtaaaattaaagccaggaatggatggaccaaaggttaaacagtggccattaacagaagaaaaaataaaagcatta…
302585_2016_AE	cctcaactcactctttggcaacgacccattgtcacagtaaaaataggaggacaaatgaaagaagctctattagatacaggagcagatgatacagtattagaagatataaatttgccaggaaaatggaaaccaaaaatgatagggggaattggaggttttatcaaggtaaagcaatatgatcagatacttatagaaatttgtggaaagaaggctataggtacagtgttagtaggacctacacctatcaacataattgggcgaaatatgttgactcagattggttgtactctaaatttcccaattagtcctattgacactgtaccagtaacattaaaaccaggaatggatggaccaaaagtcaaacagtggccactaacagaagaaaaaataaaagcatta…
302608_2016_AE	cctcaaatcactctttggcaacgaccccttgtcacaataaaaataggaggacagataaaagaagctctattagatacaggagcagatgatacagtattagaagatataaatttgccaggaaaatggaaaccaaaaatgatagggggaattggaggttttatcaaagtaaggcaatatgatcagataactatagaaatttgtggaaaaaaggctataggtacagtgttagtaggacctacacctatcaacataattggacgaaatatgttgactcagcttggttgtactttaaatttcccaattagccctattgacactgtaccagtaaaattaaagccaggaatggatggaccaaaggttaaacagtggccattaacagaagaaaaaataaaagcatta…
302622_2016_AE	cctcaaatcactctttggcaacgaccccttgtcacagtaaaaatagaaggacagataaaagaagctctattagatacaggagcagatgatacagtattagaagatataaatttgacaggaaaatggaaaccaaaaatgatagggggaattggaggttttatcaaagtaaggcaatatgatcagatacttatagaaatttgtggaaaaagggctataggtacagtgttagtaggacctacacctgtcaacatcattggaagaaatatgttgactcagattggttgtactttaaayttcccaattagccctattgacactrtaccagtaaaattaaagccaggtatggatggaccaagggttaaacaatggccattaacagaagaaaaaataaaagcatta…
302630_2016_AE	cctcaaatcactctttggcaacgacccattgtcacagtaaaaatagaaggacagctaaaagaagctctattagacacaggagcagatgatacagtattagaagatataaatttgccaggaaaatggaaaccaaaaatgatagggggaattggaggttttatcaaggtaaggcaatatgatcagatakytatagaaatttgtggaaaaagggctataggtacagtgttagtaggacctacacctgtcaacataattggacgaaatatgttgactcagattggttgtactttaaatttcccaattagccctattgacactgtaccagtaamattaaagccaggaatggatggaccaaaggttaaacagtggccattaacagaagaaaaaataaaagcatta…
302641_2016_AE	cctcaaatcactctttggcagcgaccccttgtcacaataaaaatagaaggacagctaagagaagctctattagatacaggagcagatgatacagtattagaagatataaatttgccaggaaaatggaaaccaaaaatgatagggggaattggaggttttatcaaggtcaggcaatatgatcagatacttatagaaatttgtggaaaaaaggctataggtacagtrttagtaggacctacacctgtcaacataattggacgaaacatgttgactcagcttggttgtactttaaatttcccaattagtcctattgacactgtaccagtaacattaaagccaggaatggatggaccaaaggttaaacagtggccattaacagaagaaaaaataaaagcatta…
302647_2016_AE	cctcaaatcactctttggcaacgacccctcgtcacaataaaaataggaggacagatgagagaggctctattagatacaggagcagatgatacagtattagaagatataaatttgccaggaaaatggaaaccaaaaatgatagggggaattggaggttttatcaaggtaaggcaatatgatcagatacctatagaaatttgtggaaaaaaggccataggtacagtgttagtaggacctacacctatcaacataattggacgaaatatgttgactcagcttggttgtactttaaattttccaattagccctattgacactgtaccagtaaaattaaagccaggaatggatggaccaaaagttaaacagtggccattaacagaagaaaaaataaaagcatta…
302652_2016_AE	cctcaaatcactctttggcaacgacccattgtcacagtaaaaatagaaggacagatgaaagaagctctattagatacaggagcagatgatacagtattagaagatataaatttgccaggaaaatggaaaccaaaaatgatagggggaattggaggttttatcaaagtaagacaatatgaccagatacttatagaaatttgtggcaaaaaagctataggtacagtgttagtaggacctacacctgtc~~~~~~~~~~~~~~~~~~~~~~~~~~~~~~~~~~~~~~~~~~~~~~~~~~~ccaattagccctattaacactgtaccagtaacattaaagccaggaatggatggaccaaaagttaaacagtggccattaacagaagaaaaaataaaagcatta…
302658_2016_AE	cctcaaatcactctttggcaacgacccmttgtcacagtaaaaatagggggacagatraaagaagctctattagatacaggagcagatgatacagtattagaagatataaatttgccaggaaaatggaaaccaaaaatgatagggggaattggaggtttyatcaaggtaagacaatatgatcagatacttatagaaatttgtggraaaaaagctataggtacagtgttagtaggacctacacctgtcaacataattggacgaaatatgttgactcagattggttgyactttaaatttcccaattagccmtattgacactgtaccagtaamattaaagccaggaatggatggaccaaaggttaaacaatggccattaacagargaaaaaataaaagcatta…
302692_2016_AE	cctcaaatcactctttggcaacgaccccttgttacagtaaaaataggaggacaratgaaagaagctctattagatacaggagcagatgatacagtattagaagatataaatttgccaggaaaatggaaaccaaaaatgatagggggaattggaggttttatcaaggtaaagcaatatgatcagatacttatagaaatttgtggaaaaaaggctataggtacagtgttagtaggacctacacctatcaacataattggacgaaatatgttgactcagattggttgtactctaaatttcccaattagtcctattgacacggtaccagtaacattaaagccaggaatggatggaccaaaggttaaacaatggccattaacagcagaaaaaataaaagcatta…
302702_2016_AE	cctcaaatcactctttggcaacgaccccttgtcacaataaaaatagcaggacagatraaagaagctctattagatacaggagcagatgatacagtattagaagatataaatttgccaggaaaatggaaaccaaaaatgatagggggaattggaggttttatcaaggtaaggcaatatgatcagatatctatagaaatttgtggaaaaaaggctataggtacagtgttagtaggacctacacctgtcaatataattggacgtaatatgttgactcagcttggttgtactttaaatttcccaattagtcctattgacactgtaccagtaacattaaagccaggaatggatggaccaaaggttaaacagtggccattaacagaagaaaaaataaaagcatta…
302706_2016_AE	cctcaaatcactctttggcaacgaccccttgtcacaataaaaataggaggacagatgagagaagctctattagatacaggagcagatgatacagtattagaagatataaatttgccaggaaaatggaaaccaagaatgatagggggaattggaggttttatcaaggtaaagcaatatgatcaaatacttatagaaatttgtggaaaaaaggctataggtacagtgttagtaggacctacacctatcaacataattggacgaaatatgttgactcagattggttgtactttaaatttcccaattagcaagattgacactgtaccagtaacattaaagccaggaatggatggaccaagggttaaacagtggccattaacagaagaaaaaataaaggcacta…
302721_2016_AE	cctcaaatcactctttggcaacgaccccttgtcacaataaaaatagggggacagatgaaagaagctctattagatacaggagcagatgatacagtattagaagatataaatttgccaggaaaatggaaaccaaaaatgatagggggaattggaggttttatcaaagtaaggcaatatgatcagatacctatagaaatttgcggaaaaagggctgtaggtacagtgttagtaggacctacacctatcaacataattggacgaaatatgttgactcagcttgggtgtactttaaatttcccaattagccctattgacactgtaccagtaacattaaagccaggaatggatgkaccaaaggttaaacagtggccattaacagaagaaaaaataaaagcatta…
302767_2016_AE	cctcaaatcactctttggcaacgacccattgtcacagtaaaaatagaaggacagatgaaagaagctctattagatacaggagcagatgatacagtattagaagatataaatttgccaggaaaatggaaaccaaaaatgatagggggaattggaggttttatcaaagtaagrcaatatgatcagatacttatagaaatttgtggaaaaagrgctrtaggtacagtgttagtaggacctacacctgtcaacataattggacgaaatatgttgactcagattggttgtactttaaatttcccaattagccctattgacactgtaccagtaacattaaagccaggaatggatggaccaaaggttaaacaatggccattaacagaagaaaaaataaaagcatta…
302768_2016_AE	cctcaaatcactctttggcaacgaccccttgtcacagtaaaaataggaggacaggtgaaagaagctctattagatacaggagcagatgatacagtattagaagacataaatttgccaggaaaatggaaaccaaaaatgatagggggaattggaggttttatcaaggtaaggcaatatgatcagatacctatagaaatttgtggaaaaagggctataggtacagtgttagtaggacctacacctatcaacataattggacgaaatatgttgactcagcttggttgtactttaaatttcccaattagccctattgacactgtaccagtaaaattaaagccaggaatggatggaccaaaggttaaacagtggccattaacagaagaaaaaataaaagcatta…
302795_2016_AE	CCTCAAATCACTCTTTGGCAACGACCCCTTGTCACAATAAAAGTAGGAGGACAGATGAAAGAAGCTCTATTAGATACAGGAGCAGATGATACAGTATTAGAAGATATAAATTTGCCAGGAAAATGGAAACCAAAAATGATAGGGGGAATTGGAGGTTTTATCAAGGTAAGGCAGTATGATCAGATACTTATAGAAATTTGTGGGAAAAAGGCTATAGGTACAGTGTTAGTAGGACCTACACCTGTCAACATAATTGGACGAAATATGTTGACTCAGCTTGGTTGTACTTTAAATTTCCCAATTAGCCCTATTGACACTGTACCAGTAAACTTAAAGCCAGGAATGGATGGACCAAAGGTTAAACAATGGCCATTAACAGAAGAAAAAATAAAAGCATTA…
302800_2016_AE	CCTCAAATCACTCTTTGGCAACGACCCCTTGTCACAATAAAAATAGGAGGACAGATAAAAGAAGCTCTATTAGATACAGGAGCAGATGATACAGTATTAGAAGATATAAATTTGCCAGGAAAATGGAAACCAAAAATGATAGGGGGAATTGGAGGTTTTATCAAGGTAAGGCAATATGATCAGATACTTATAGAAATTTGTGGAAAAAAGGCTATAGGTACAGTGTTAGTAGGACCTACACCTATCAACATAATTGGACGAAATATGTTGACTCAGCTTGGTTGTACTTTAAATTTTCCAATTAGCCCTATTAACACTGTACCAGTAACATTAAAGCCAGGAATGGATGGACCAAAGGTTAAACAGTGGCCATTAACAGAAGAAAAAATAAAAGCATTA…
302807_2016_AE	cctcaaatcactctttggcaacgacccgttgtcacagtaaaaataaaaggacagctgaaagaagctctactagatacaggggcagatgatacagtattagaagatataaatttgccaggaaaatggaaaccaaaaatgatagggggaattggcggttttatcaaagtaaggcaatatgatcagatacttatagaaatttgtggaaaacaggctataggtacagtgttagtaggacctacacctgtcaacataattggacgaaatatgttgactaagattggttgtactttaaattttccaattagccctattgacactgtaccagtaacattaaagccaggaatggatggaccaaaggttaaacaatggccattaacagaagaaaaaataaaagcatta…
302822_2016_AE	cctcaaatcactctttggcaacgaccccttgtcacagtaaaaataggagggcagatgagaraagctctattagatacaggagcagatgatacagtattagaagatatagacttgccaggaaaatggaaaccaaaaatgatagggggaattggaggttttatcaaagtaaggcaatatgatcagatacttatagaaatttgtggaaaaagggctataggtacagtattagtaggacctacacctgtcaacataattggacgaaatatgtygactcagattggatgtactttaaatttcccaattagccctattgacactgtaccagtaacattaaagccaggaatggatggaccaaaggttaaacaatggccattaacagaagaaaaaataaaagcatta…
302826_2016_AE	cctcaaatcactctttggcaacgaccccttgtcacagtaaaagtaggaggacagataaaagaagctctattagatacaggagcagatgatacagtattagaagatataaatttgccaggaaaatggaaaccaaaaatgatagggggaattggaggttttatcaaggtaaagcaatatgatcagatatytataraaatttgtggaaaaaaggctataggtacagtgctagtaggacctacacctgtcaacataattggacgaaatatgttgactcagcttggttgtaccttaaatttcccaattagccctattgacactgtaccagtaaaattaaagccaggaatggatggaccaaaagttaaacagtggccattaacagaagaaaaaataaaagcatta…
302830_2016_AE	CCTCAAATCACTCTTTGGCAACGACCCCTTGTCACAGTAAAAATAGGAGGACAGATAAAAGAAGCTCTGTTAGATACAGGAGCAGATGATACAGTATTAGAAGATATAGATTTACCAGGAAAATGGAAACCAAAAATGATAGGGGGAATTGGAGGTTTTATCAAAGTAAGGCAATATGATCAGATAACTATAGAAATTTGTGGAAAAAAGGCTATAGGTACAGTGTTAGTAGGACCTACACCTGTCAACATAATTGGACGAAATATGTTGACTCAGATTGGTTGTACTTTAAATTTCCCAATTAGCCCTATTGACACTGTACCAGTAACATTAAAGCCAGGAATGGATGGACCAAAGGTTAAACAGTGGCCATTAACAGAAGAAAAAATAAAAGCATTA…
302833_2016_AE	cctcaaatcactctttggcaacgaccccttgttacagtaaaaataggaggacaaatgatagaagccctgttagatacaggagcagatgatacagtattagaagatataaatttgccaggaaaatggaaaccaaaaatgatagggggaattggaggttttatcaaagtaaggcaatatgatcagatacttatagagatttgtggaaaaagggctataggtacagtgttagtaggacctacacctatcaacataattggacgaaatatgttgactcagattggttgtactttaaatttyccaattagccctattgacactgtaccagtaaaattaaagccaggaatggatggaccaaaagttaaacaatggccattaacagaagaaaaaataaaagcatta…
302839_2016_AE	CCTCAAATCACTCTTTGGCAACGACCCCTTGTCACAGTAAAATTAGGAGGACAGATGATAGAAGCTCTATTAGATACAGGAGCAGATGATACAGTATTAGAAGAGATAAATTTGCCAGGAAAATGGAAACCAAAAATGATAGGGGGAATTGGAGGTTTTATCAAAGTAAGGCAATATGATCAGATAGCTATAGAAATTTGTGGAAAAAGGGCTGTAGGTACAGTGTTAGTAGGACCTACACCTATCAACATAATTGGACGAAATATGTTGACCCAGATTGGTTGTACTTTAAATTT~CCCATTAGCCCTATTGACACTGTACCAGTAACATTAAAGCCAGGAATGGATGGACCAAAGGTTAAACAGTGGCCATTAACAGAAGAAAAAATAAAAGCATTA…
302858_2016_AE	cctcaaatcactctttggcaacgaccccttgtctcaataaaaataggaggacagataaaagaagctctattagatacaggagcagatgatacagtattagaagatataaatttgccaggaaaatggaaaccaaaaatgatagggggaattggaggttttatcaargtaargcaatatgaaaatataatgatagagatctgtggaaaaagggctataggtacagtgttagtaggacctacacctatcaacataattggacgaaatatgttgactcagcttggttgtactttaaatttcccaattagccctattgacactgtaccagtaaaattaaagccaggaatggatggaccaaaggttaaacagtggccattaacagaagaaaaaataaaagcatta…
302878_2016_AE	cctcaaatcactctttggcaacgacccattgtcaaagtaaraataggaggacagatgatagaagctctattagatacaggagcagatgatacagtattagaagatataaatttgccaggaaaatggaaaccaaaaatgatagggggaattggaggttttatcaaggtaaaacaatatgatcagatacttatagagatttgtggaaaaagggctgtaggtacagtgttagtaggacctacacctatcaacataattggacgaaatatgttgactcagattggttgtactctaaacctcccaattagtcctattgacactgtaccagtaacattaaagccaggaatggatggaccaaaagttaaacagtggccactaacagaagaaaaaataaaagcatta…
302881_2016_AE	cctcaaatcactctttggcaacgacccgttgtcacagtaaaagtagagggacagatgatagaagctctattagatacaggagcagatgatacagtattagaagatataaatttgccaggaaaatggaaaccaaaaatgatagggggaattggaggttttatcaaggtaagacaatatgatcagatacttatagaaatttgtggaaaaaaggctataggtacagtgttagtaggacctacacctgtcaacataattgggcgaaatatgttgactcagattggttgtactttaaatttcccaattagccctattaacactgtaccagtaaaattaaagccaggaatggatggaccaaaagttaaacaatggccattaacagaagaaaaaataaaagcatta…
302882_2016_AE	cctcaaatcactctttggcaacgacccgttgtcacagtaaaagtagagggacagatgatagaagctctattagatacaggagcagatgatacagtattagaagatataaatttgccaggaaaatggaaaccaaaaatgatagggggaattggaggttttatcaaggtaaggcaatatgatcagatacttatagaaatttatggaaaaaaggctataggtacagtgttagtaggacctacacctgtcaacataattgggcgaaatatgttgactcatattggttgtactttaaattttccaattagccctattaacactgtaccagtaaaattaaagccaggaatggatggaccaaaggttaaacagtggccattaacagaagaaaaaataaaagcatta…
302900_2016_AE	cctcaaatcactctttggcaacgaccccttgtcacaataaaaataggaggacagatgagagaagctctattagatacaggagcagatgatacagtattagaagatataaatttaccaggaaaatggaaaccaaaaatgatagggggaattggaggttttatcaaggtaaagcaatatgatcagatatctatagaaatttgtggaaaaagggctataggtacagtgttagtaggacccacacctatcaacataattggacgaaatatgttgactcagattggttgtactttaaatttcccaattagccctattgacactgtaccagtaacattaaagccaggaatggatggaccaaaggttaaacagtggccattaacagaagaaaaaataaaggcacta…
302907_2016_AE	cctcaaatcactctttggcaacgaccccttgtcacaataaaagtaggaggacaaatgagagaagctctattagatacaggagcagatgatacagtattagaagatataaatttgccaggaaaatggaaaccaaaaatgatagggggaattggaggttttatcaargtaagacaatatgatcagatacttatagaaatttgtggaaaaaaggctataggtacagtgttagtaggtcctacacctatcaacataattggacgaaatatgttgactcarcttggttgtactttaaatttcccaattagccctattgacactgtaccagtaacattaaagccaggwatggatggaccaaaagttaaacartggccattaacagaagaraaaataaaagcatta…
302909_2016_AE	cctcaaatcactctttggcaacgacccattgtcacaataaaagtagaaggacagctgagagaggctctattagatacaggagcagatgatacagtcttagaagatataaatttgccaggaaaatggaaaccaaaaatgatagggggaattggaggttttatcaaggtaaggcaatatgatcagatacttatagaaatttgtggaaaaaaggctataggtacagtgttagtaggacctacacctgtcaacataattggacgaaatatgttgactcagcttggttgtactttaaatttcccaattagccctattgacactgtaccagtaaaattaaagccaggaatggatggaccaaaggttaaacagtggccattaacagaagaaaaaataaaagcatta…
302923_2016_AE	cctcaaatcactctttggcaacgaccccttgtcacaataaaaataggrggacagayaaaagaagctctattagatacaggagcagatgatacagtattagaagatataaayytgccaggaaaatggaaaccaagaatgatagggggaattggaggttttatcaargtaaggcaatatgatcagataactatagaaatttgtggraaaagrgctataggtacagtgttartaggacctacacctatcaacataattggacgaaatatgttgactcagcttggttgtactytaaatttcccaattagccctattgacactrtaccagtaaaattaaagccaggaatggatggaccaaaggttaaacagtggccattaacagaagaaaaaataaaagcatta…
302930_2016_AE	cctcaaatcactctttggcaacgaccccttgtcacaataaaaatagcaggacaaataaaagaagctctattagatacaggagcagatgatacagtattagaagatataaatttgccaggaaaatggaaaccaaaaatgatagggggaattggaggttttatcaaggtaaagcaatatgatcagatacttatagaaatttgtgggaaaaaagctataggtacagtgttagtaggagatacacctgtcaacataattggacgaaatatgttgactcagcttggttgtactttaaatttcccaattagccctattgacactgtaccagtaacattaaagccaggaatggatggaccaaaggttaaacagtggccattaacagaagaaaaaataaaagcatta…
302932_2016_AE	cctcaaatcactctttggcaacgaccccttgtcacartaaraatagggggacagmyaagagaagcyctattagatacaggagcagatgatacagtattagaagatatagatttgccaggaaaatggaaaccaaaaatgatagggggrattggaggttttatcaaagtaaggcaatatgatcagatacttatagaaatttgtggaaaaagggctataggtacagtgttagtaggacctacacctgtcaacataattggacgaaatatgttgactcagattggctgtactttaaatttcccaattagccctattgacactgtaccagtaaaattaaagccaggaatggatggaccaaaggttaaacaatggccattaacagaagaaaaaataaaagcatta…
302933_2016_AE	cctcaaatcactctttggcaacgacccattgtcacagtaaagataggaggacaaatgaaagaagctctattagatacaggagcagatgatacagtgttagaagatataaatttgccaggaaaatggaaaccaaaaatgatagggggaattggaggttttatcaaagtaaggcaatatgatcagatagtcatagaaatttgtgggaaaagagctrtaggtacagtgttagtaggacctacacctgtcaacataattggacgaaacatgttgactcagattggttgtactttaaatctcccaattagccctattgacactgtaccagtaacattaaagccagggatggatggaccaaaggttaaacagtggccattaacagaagaaaaaataaaagcatta…
302935_2016_AE	cctcaaatcactctttggcaacgaccccttgtcacagtaaaaataggaggacagatgagagaagctctattagatacaggagcagatgatacagtattagaaaatgtaaatttgccaggaaaatggaaaccaaaaatgatagggggaattggaggttttatcaaggtaaagcaatatgatcagatacctatagaaatttgtggaaaaaaggctgtaggtacagtgttagtaggacctacacctatcaacataattggacgaaatatgttgactcagcttggttgtactttaaatttcccaattagccctattgacactgtaccagtaaaattaaagccaggaatggatggaccaaaagttaaacaatggccattaacagaagaaaaaataaaggcacta…
302942_2016_AE	cctcaaatcactctttggcaacgaccccttgtcccagtaaaaataggaggacagataaaagaagctctattagatacaggagcagatgatacagtattagaagatataaayttgccaggaaaatggagaccaaaaatgatagggggaattggaggttttatcaaggtaagacaatatgatcagrtatctatagaaatttgtggaaaaaaggctataggtwcagtgttagtaggacctacacctgtcaacataattggacgaaatatgttgactcagattggttgtactttaaatttcccaattagtcctattgacactataccagtaacattaaagccaggaatggatggaccaaaggttaarcagtggccattaacagaagaaaaaataaaagcatta…
302943_2016_AE	cctcaaatcactctttggcaacgaccccttgtcacaataaaaatagaaggacagataaaagaagctctattagatacaggagcagatgatacagtattagaagatataaatttaccaggaaaatggaaaccaaaaatgatagggggaattggaggttttattaaagtaaggcaatatgagcagatacttatagaaatttgtggaaaaagggctgtcggtacagtgttagtagggcctacacctgtcaacataattggacgaaatatgttgactcagcttggttgtactttaaatttcccaattagccctattgaaactgtaccagtaaaattaaagccaggaatggatggaccaaaggttaaacagtggccattaacagaagaaaaaataaaagcatta…
303000_2016_AE	cctcaaatcactctttggcaacgaccccttgtcacagtaaaartaggaggacaratgaaagaagctctattrgatacaggagcagatgatacagtattagaagatataaatttgccaggaaaatggaaaccaaaaatgatagggggaattggaggttttatcaaagtaaggcaatatgatcagatacttatagaaatttgtggaaagaaagctataggtacagtgttagtaggacctacacctrtcaacataattggacgaaatatgttgactcagatyggctgtactttaaatttyccaattagccctattgacactgtaccagtaaaattaaaaccaggaatggatggaccaaaggttaaacagtggccattaacagaagaaaaaataaaagcatta…
303114_2016_AE	cctcaaatcactctttggcaacgacctrttgtcacagtaaaaatagaaggacagataaargaagctctattagacacaggagcagatgatacagtattagaagatataaatttgccaggaaaatggaaaccaaaaatgatagggggaattggaggttttatcaaggtaaracaatatgatcagatacttatagagatttgtggaaaaagrgctataggtacagtgttagtagggcctacacctrtcaacataattggacgaaatatgttgactcagattggttgtactttaaatttcccaattagccctattgaaactgtaccagtaaaattaaagccaggaatggatggaccaaaggttaaacagtggccattaacagaagaaaaaataaaagcatta…
303265_2017_AE	CCTCAAATCACTCTTTGGCAGCGACCCCTTGTCCCAATAAAAATAGGAGGACAGATAAAAGAAGCTCTATTAGATACAGGAGCAGATGATACAGTATTAGAAGATATAAATTTGCCAGGAAAATGGAAACCAAAAATGATAGGGGGAATTGGAGGTTTTATCAAGGTAAGGCAATATGATCAGATAGCTATAGAAATTTGTGGAAAAAGGGCTATAGGTACAGTGTTAGTAGGACCTACACCTATCAACATAATTGGACGAAATATGTTGACTCAGCTTGGTTGTACTTTAAATTTCCCAATYAGCCCTATTGACACTGTACCAGTAAAATTAAAGCCAGGAATGGATGGACCAAAGGTTAAACAGTGGCCATTAACAGAAGAAAAAATCAAAGCATTA…
303372_2017_AE	CCTCAAATCACTCTTTGGCAACGACCCCTTGTCACAGTAAAAATAGGAGGACAAATAAGAGAAGCTCTATTAGACACAGGAGCAGATGATACAGTATTAGAAGAGATAAATTTGCCAGGAAAATGGAAACCAAAAATGATAGGGGGAATTGGAGGTTTTATCAAGGTAAGGCAATATGATCAAATACTTATAGAAATTTGTGGAAAAAGGGCCATAGGTACAGTGTTAGTAGGACCTACACCTGTCAACATAATTGGACGAAATATGTTGACCCAGCTTGGTTGTACTTTAAATTTCCCAATTAGTCCTATTGACACTGTACCAGTATCATTAAAGCCAGGAATGGATGGACCAAAAGTTAAACAGTGGCCATTAACAAAAGAAAAAATAGAAGCATTA…
303445_2017_AE	CCTCAAATCACTCTTTGGCAACGACCCATTGTCACAGTAAAAATAGGAGGACAGATGAAAGAAGCTCTATTAGATACAGGAGCAGATGATACAGTATTAGAAGATATAAATTTGCCAGGAAAATGGAAGCCAAAAATGATAGGGGGAATTGGAGGTTTYATCAAGGTAAGGCAATATGATCAGATACTTATAGAAATTTGTGGACAAAAAGCTATAGGTACAGTGTTAGTAGGACCTACACCTATCAACATAATTGGACGAAATATGTTGACTCAGATTGGTTGTACTTTAAATTTCCCAATTAGCCCTATTGACACTGTACCAGTAACATTAAAGCCAGGAATGGATGGACCAAAAGTTAAACAGTGGCCATTAACAGAAGAAAAAATAAAAGCATTA…
303511_2017_AE	CCTCAAATCACTCTTTGGCAACGACCCCTTGTCACAATAAAAGTAGGAGGACAGATAAAAGAAGCTCTATTAGATACAGGAGCAGATGATACTGTATTAGAAGATATAAATTTGCCAGGAAAATGGAAACCAAAAATGATAGGGGGAATTGGAGGTTTTATCAAAGTAAGGCAATATGATCAGATACTTATAGAAATTTGTGGAAAAAAGGCTATAGGTACAGTGTTAGTAGGGCCTACACCTATCAACATAATTGGACGAAATATGTTGACTCAGCTTGGTTGTACTTTAAATTTCCCAATTAGCCCTATYGACACTGTACCAGTAAAGTTAAAGCCAGGAATGGATGGACCAAAGGTTAAACAGTGGCCATTAACAGAAGAAAAAATAAAAGCATTA…
320924_2016_AE	cctcaaatcactctttggcaacgaccccttgtcacagtaaaaataggaggacagataaaagaagctctattagatacaggagcagatgatacagtattagaagatataaatttgccaggaaaatggaaaccaaaaatgatagggggaattggaggttttattaaggtaaggcaatatgatcagatacttatagaaatttgtggaaaaaaggctataggtacagtgttagtaggacctacacctgtcaacataattggacgaaatatgttgacacagattggttgtactttaaatttcccaattagccctattgacactgtaccagtaaaattaaagccaggaatggatggaccaaaggttaaacagtggccattaacagaagaaaaaataaaagcatta…
321492_2016_AE	cctcaaatcactctttggcaacgaccccttgtcacaataaaaataggagaacagataaaagaagctctattagatacaggagcagatgatacagtattagaagatataaatttgccaggaaaatggaaaccaagaatgatagggggaattggaggttttatcaaggtaagacaatatgatcagataactatagaaatttatgggaaaagggctataggtacagtgttagtaggacctacacctatcaacataattggacgaaatatgttgactcagcttggttgtactttaaatttcccaattagccctattgacactataccagtaaaattaaagccaggaatggatggaccaaaggttaaacagtggccattaacagaagaaaaaataaaagcatta…
321621_2016_AE	cctcaaatcactctttggcaacgaccccttgtcacagtaaaagtaggaggacagatgaaagaagctctattagatacaggagcagatgatacagtattagaagatataaatttgccaggaaaatggaaaccaaaaatgataggggggattggaggttttatcaaggtaaggcaatatgatcagatacctatagaaatttgtggaaaaaaggctataggtacagtgttagtaggacctacacctgtcaacataattggacgaaatatgttgactcagcttggctgtactttaaatttcccaattagccctattgacactgtaccagtaaaattaaagccaggaatggatggaccaaaggttaaacagtggccattaacagaagaaaaaataaaagcatta…
322328_2016_AE	CCTCAAATCACTCTTTGGCAGCGACCCCTTGTTACCATAAAAATAGGGGGACAGCTGAAAGAAGCTCTGTTAGACACAGGAGCAGATGATACAGTATTAGAAGATATAAATTTGCCAGGAAAATGGAAGCCAAAAATGATAGGGGGAATTGGAGGTTTTATCAAAGTAAGGCAATATGATCAGATACTTATAGAAATTTGTGGAAAAAAGGCTATAGGYACAGTRTTAGTAGGACCTACACCTGTCAACATAATTGGRCGAAATATGTTGACTCAGATTGGTTGTACTTTAAA~TTTCCCATTAGTCMTATTGACACTGTACCAGTAAAATTAAAGCCAGGAATGGATGGACCAAAGGTTAAACAGTGGCCATTAACAGAAGAAAAAATAAAAGCATTA…
322394_2016_AE	cctcaaatcactctttggcaacgacccgttgttgcagtaaaaatagaaggacagatgaaagaagctctattagatacaggagcagatgatacagtattagaagatataaatttgccaggaaaatggaaaccaaaaatgatagggggaattggaggttttatyaaggtaaggcaatatgatcagatacttatagaaatttgtggraaaaargctatrggtacagtgttagtrggacctacacctgtcaacataattggacgaaatatgttgactcagattggttgtactttaaatttcccaattagccctattgacactgtaccagtaaaattaaagccaggaatggatggaccaaaggttaaacagtggccattaacagaagaaaaaataaaagcatta…
322418_2016_AE	cctcaactcactctttggcaacgacccattgtcacagtaaaaataggaggacaaatgaaagaagctctattagatacaggagcagatgatacagtattagaagatataaatttgccaggaaaatggaaaccaaaaatgatagggggaattggaggttttatcaaggtaaagcaatatgatcagatacttatagaaatttgtggaaagaaggctataggtacagtgttagtaggacctacacctatcaacataattggacgaaatatgttgactcagattggttgtactctaaatttcccaattagtcctattgacactgtaccagtaacattaaaaccaggaatggatggaccaaaagtcaaacagtggccattaacagaagaaaaaataaaagcatta…
322514_2016_AE	cctcaaatcactctttggcaacgaccccttgtcacaataaaaataggaggacagataaaagaagctctattagatacaggagcagatgatacagtattagaagagataaatttgccaggaaaatggaaaccaaaaatgatagggggaattggaggttttatcaaggtaaggcaatatgatcagatacctatagaaatttgtggaaaaaaggctataggtacagtgttagtaggacctacacctgtcaacataattggacgaaatatgttgactcagcttggttgtactttaaatttcccaattagccctattgacactgtaccagtaaaattaaagccagaaatggatggaccaaaggttaaacaatggccattaacagaagaaaaaataaaagcttta…
328866_2016_AE	cctcaaatcactctttggcaacgaccccttgtcacaataaaagtagaaggacaattgagagaggctctattagatacaggagcagatgatacagtattagaagatataaatttgccaggaaaatggaaaccaaaaatgatagggggaattgggggttttatcaaggtaaggcaatatgatcagatacttatagaaatttgtggaaagagggctgtaggtacagtgttagtaggacctacacctgtcaacataattggacgaaatatgttgactcagcttggttgtactttaaatttccccattagccctattgacactgtaccagtaacattaaagccaggaatggatggaccaaaggttaaacagtggccattaacagaagaaaaaataaaagcatta…
328888_2016_AE	cctcaaatcactctttggcagcgaccccttgtcacagtaaaaataggaggacagataaaagaagctctattagatacaggagcagatgatacagtattagaagatataaatttgccaggaaaatggaaaccaaaaatgatagggggaattggaggttttatcaaggtaaggcaatatgatcagataatgatagaaatttgtggaaagaaggctataggtacagtgttagtaggacctacacctgtcaacataattggacgaaatatgttgactcagattggttgtactttaaatttcccaattagccctattgacactgtaccagtaacattaaagccaggaatggatggaccaaaagttaaacagtggccattaacagaagaaaaaataaaagcatta…
130001_2016_AE	~~~~~~~~~~~~~~~TGGCAACGACCCCTTGTCCCAATAAAAGTAGGAGGTCAGATGAGAGAAGCTCTATTAGATACAGGAGCAGATGATACAGTATTAGAAGATATAAATYTGCCAGGAAAATGGAAACCAAAAATGATAGGGGGAATTGGAGGTTTTATCAAAGTAAGACAATATGATCAGATACTTATAGAAATTTGTGGAAAAAAGGCTATAGGTACAGTGTTAGTAGGACCTACACCTATCAACATAATTGGACGAAATATGTTGACTCAGCTTGGTTGTACTTTAAATTTCCCAATTAGCCCTATTGACACTGTACCAGTAACATTAAAGCCAGGAATGGATGGACCAAAGGTTAAACAGTGGCCATTAACAGAAGAAAAAATAAAAGCATTA…
130009_2016_AE	cctcaaatcactctttggcaacgaccccttgtcacagtaaaaatagaaggacagataaaagaagctctattagatacaggagcagatgatacagtattagaagatataaatttgacaggaaaatggaaaccaaaaatgatagggggaattggaggttttatcaaagtaaggcaatatgatcagatacttatagaaatttgtggaaaaagggctataggtacagtgttagtaggacctacacctgtcaacattattggacgaaatatgttgactcagattggttgtactttaaatttcccaattagccctattgacactgtaccagtaaaattaaagccaggtatggatggaccaaaggttaaacaatggccattaacagaagaaaaaataaaagcatta…
130013_2016_AE	~~~~~~~~~~~~~~~TGGCAACGACCCGTTGTCACAGTAAAAGTAGCAGGACAGATGAWAGAAGCTCTATTAGATACAGGAGCAGATGATACAGTATTAGAAGATATAAATTTGCCAGGAAAATRGAGACCAAAAATGATAGGGGGAATTGGAGGTTTTATCAAAGTAAGGCAATATGATCAGATACYYATAGAAATTTGTGGAAARCAGGCTATAGGGACAGTGTTAGTAGGACCTACACCTGTCAACATAATTGGACGAAATATGTTGACTCAGATTGGTTGTACTTTAAATTTCCCARTTAGCWCCATTGACACTGTACCAGTARCATTAAAGCCAGGAATGGATGGACCAAAGGTTAAACARTGGCCATTAACAGAAGARAAAATAAAAGCATTA…
130017_2016_AE	~~~~~~~~~~~~~~~TGGCAACGACCTCTTGTCCCAGTAAAAATAGAAGGACAGATGATAGAAGCTCTATTAGATACAGGAGCAGATGATACAGTATTAGAAGATATAAATTTGCCAGGAAAATGGAAACCAAAAATRATAGGGGGAATTGGAGGTTTTATCAAAGTAAGGCAATATGAKCAGATACTTATAGAAATTTGTGGAAAAAGGGCTGTAGGWACAGTGTTAGTAGGACCTACACCTGTCAACATCATTGGACGAAATATGTTGACTCAGATTGGTTGTACTTTAAATTTCCCAATTAGTCCCATTGACACTGTRCCAGTAAAATTAAAACCAGGAATGGATGGACCAAAGGTTAAACAGTGGCCATTAACAGARGAAAAAATAAAAGCATTA…
130051_2016_AE	~~~~~~~~~~~~~~~TGGCAACGACCCCTTGTCACAGTAAAAATAGGAGGACAGCTAAAAGAAGCTCTATTAGATACAGGAGCAGATGATACAGTATTAGAAGATATAAATTTGCCAGGAAAATGGAAACCAAAAATGATAGGGGGAATTGGAGGCTTTATCAAGGTAAGACAATATGATCAGATACTTATAGAAATTTGTGGAAAAAAGGCTATAGGTACAGTGTTAGTAGGACCTACACCTGTCAACATAATTGGACGAAATATGTTGACTCAGATTGGTTGTACTTTAAATTTTCCAATTAGCCCTATTGATACTGTACCAGTAACATTAAAGCCAGGAATGGATGGACCAAAAGTTAAACAGTGGCCATTAACAGAAGAAAAAATAAAAGCATTA…
130053_2016_AE	~~~~~~~~~~~~~~~TGGCAACGACCCCTTrTCACAGTAAAAATAGRAGGACAGATRAAAGAARCTCTATTAGATACAGGAGCAGATGATACAGTATTAGAAGATATAAATTTGCCAGGRAAATGGAARCCAAAAATGATAGGGGGAATTGGAGGTTTTATCAAGGTAAGGCAATATGATCAGATAYTKATAGAAATTTGTGGRAAAAGGGCTATAGGTACAGTGTTAGTAGGACCTACACCTGTCAACATAATTGGACGAAAyATRTTGACTCAGATTGGKTGTACTTTAAATTTCCCAATTARCCCTATTGACACTGTGCCAGTAACATTAAAGCCAGGRATGGATGGRCCAARAGTTAAACAGTGGCCATTAACAGAAGAAAAAATAAAAGCATTA…
130056_2016_AE	~~~~~~~~~~~~~~~TGGCAACGACCCCTTGTCACAATAAAAATAGGAGGGCAGATGAGAGAAGCTCTATTAGATACAGGAGCAGATGATACAGTATTAGAAGATATAAATTTGCCAGGAAAATGGAAACCAAAAATGATAGGGGGAATTGGAGGTTTTATCAAGGTAAAGCAATATGATCAGATACTTATAGAAATTTGTGGAAAAAAGGCTATAGGTACAGTGTTAGTAGGACCTACACCTATCAACATAATTGGACGAAATATGTTGACTCAGCTTGGTTGTACTTTAAATTTCCCAATTAGTCCTATTGACACTGTACCAGTAAAATTAAAGCCAGGAATGGATGGACCAAAGGTTAAACAATGGCCATTAACAGAAGAAAAAATAAAGGCACTA…
302523_2016_AE	cctcaaatcactctttggcaacgaccccttgtcacaataaaaataggaggacaaataaaagaagctctattagatacaggagcagatgatacagtattagaagatataaatttgccaggaaaatggaaaccaaaaatgatagggggaattggaggttttatcaaggtaaggcaatatgatcaggtacttatagaaatttgtggacaaaaggctataggtacagtgttagtaggacctacacctatcaacataattggacgaaatatgttgactcagcttggttgtactttaaattttccaattagccctattgacactgtaccagtaaaattaaagccaggaatggacggaccaagggttaaacagtggccactaacagaagaaaaaataaaagcatta…
302526_2016_AE	cctcaaatcactctttggcaacgaccccttgtcacagtaaaaataggaggacarataatagaagctctattagatacaggagcagatgatacagtattagaagatataaatttgccaggaaaatggaagccaaaaatgatagggggaattggaggttttatcaaggtaaggcaatatgatcagatacctatagaaatttgtggaaaaagggctayaggtacagtgttartaggacctacacctatcaacataattggacgaaayatgttgactcagattggttgtactttaaatttcccaattagccctattgacactgtaccagtaacattaaagccaggaatggatggaccaaaggttaaacartggccattaacagaagaaaaaataaaagcatta…
302559_2016_AE	cctcaaatcactctttggcaacgacctcttgtcccaataaagatagraggacagataaaagaagctctattagatacaggagcagatgatacagtattagaagatataratttgccaggaaaatggaaaccaaaaatgatagggggaattggaggttttatcaaggtaaggcaatatgatcagatatctatagaaatttgtggaagaagggctataggtacagtgttagtaggacctacacctgtcaayataattggacgaaatatgttgactcagcttggttgtactttaaatttcccaattagccctattgacactgtaccagtaaaattaaagccaggaatggatggaccaaaggttaaacagtggccattaacagaagaaaaaataaaagcatta…
302561_2016_AE	cctcaaatcactctttggcaacgaccccttgtcacaataaaaataggaggacagatgagagaagccctattagatacaggagcagatgatacagtattagaagatataaatttgccaggaaaatggaaaccaaaaatgatagggggaattggaggttttattaaggtaaggcaatatgatgagatacctatagaaatttgtggaaaaaaggctataggtacagtgttagtaggacctacacctatcaacataattggacgaaatatgttgactcagcttggttgtactttaaatttcccaattagccctattgacactgtaccagtaaaattaaagccaggaatggatggaccaaaggttaaacagtggccattaacagaagaaaaaataaaagcatta…
302575_2016_AE	cctcaaatcactctttggcaacgaccccttgtcacagtaaaagtaggaggacagatgagagaagctctattagatacaggagcagatgatacagtattagaagatataaatttgccaggaaaatggaaaccaaaaatgatagggggaattgggggttttatcaaggtaaagcaatatgatcagatacttatagaaatttgtggaaaaagggctataggtacagtgttagtaggacctacacctgtcaatataattggacgaaatatattgactcagcttggttgtactttaaatttcccaattagccctattgacactgtaccagtaacattaaagccaggaatggatggaccaaaggttaaacagtggccattaacagaagaaaaaataaaagcatta…
302577_2016_AE	cctcaaatcactctttggcaacgaccccttgtcacagtaaaagtagcaggacagatgatagaagctctattagatacaggagcagatgatacagtattagaagatataaatttgccaggaaaatggaaaccaaaaatgatagggggaattggaggttttatcaaagtaaggcaatatgatcagatacttatagaaatttgtggaaaacaggctatagggacagtgttagtaggacctacacctgtcaacataattggacgaaatatgttgactcagattggttgtactttaaatttcccaattagcaccgttgaaactgtaccagtgacattaaagccaggaatggatggaccaaaggttaaacagtggccattaacagaagaaaaaataaaagcatta…
302612_2016_AE	cctcaaatcactctttggcaacgaccccttgtcacagtaaaaataggaggacagatgaaagaagctctgttagatacaggagcagatgatacagtattrgaagatatagatttaccaggaaaatggaaaccaaaaatgatagggggaattggaggttttatcaaagtaaggcaatatgatcagatacttatagaaatttgtggaaaaaaggctataggtacagtgttagtaggacctacacctgtcaacataattggacgaaatatgttgactcagattggttgtactttaaatttcccaattagccctattgacactgtaccagtaamattaaagccaggaatggatggaccaaaggtyaaacagtggccattaacagaagaaaaaataaaagcatta…
302637_2016_AE	cctcaaatcactctttggcaacgacccattgtcacagtaaagataggaggacagatgaaagaagctctattagatacaggagcagatgatacagtattagaagatataaatttgccaggaaaatggaaaccaaaaatgatagggggaattggaggttttatcaaggtaaggcaatatgatcagatacttatagaaatttgtggaaaaaaggctataggtacagtgttagtaggacctacacctgtcaacataattggacgaaatatgttgactcagattggttgtactttaaatttcccaattagccctattgacactgtaccagtaaaattaaagccagggatggatggaccaaaggtcaaacagtggccattaacagaagaaaaa~taaaagcatta…
302640_2016_AE	cctcaaatcactctttggcaacgaccccttgtcacaataaaaatagagggacagttgagagaagctcttctagatacaggagcagatgatacagtattagaagatataaatttgccaggaagatggaaaccaaaaatgatagggggaattggaggttttatcaaagtaaggcaatatgatcagatacttatagaaatttgtggaaaaaaggctataggtacagtgttggtaggacctacacctgtcaacataattggacgaaatatgttgactcagcttggttgtactttaaatttcccaattagtcccattgacactgtaccagtaacattaaagccaggaatggatggaccaagggttaaacagtggccattgacagaagaaaaaataaaagcatta…
302687_2016_AE	cctcaaatcactctttggcaacgacccgttgtcacagtaagaatagaagggcagctgaaagaagctctactagatacaggggcagatgatacagtattagaagatataaatttgccaggaaaatggaaaccaaaaatgatagggggaattggaggttttatcaaagtaaggcaatatgatcagatacttatagaaatttgtggaaaacaggctataggtacagtgttagtaggacctacacctgtcaacataattggacgaaatatgttgactmagattggttgtactttaaattttccaattagccctattgacactgtaccagtaacattaaagccaggaatggatggaccaaaggttaaacaatggccrttaacagaagaaaaaataaaagcatta…
302732_2016_AE	cctcaaatcactctttggcagcgaccccttgtcacaataaaaataggaggacagatgagagaagctctattagatacaggagcagatgatacagtattagaagatataaatttgccaggaaaatggaaaccaaaaatgatagggggaattggaggttttatcaaagtaaggcaatatgatcagataacgatagaaatttgtggaaaaaaggctataggttcagtgttagtaggacctacacctgtcaacataattggacgaaatatgttgactcagattggttgtactttaaatttcccaattagccctattgacactgtaccagtagcattaaagccaggaatggatggaccaaaggttaaacagtggccattaacagaagaaaaaataaaagcatta…
302749_2016_AE	cctcaaatcactctttggcaacgacccctygtcacaataaaartagcaggacagmtgagagaagctctattagatacaggagcagatgatacagtattagaagakataaatttgccaggaaaatggaaaccaaaaatgatagggggaattggaggttttatcaargtaaagcaatatgatcagatacttatagaaatttgtggaaagaaggctataggtacagtgttagtaggacctacmcctgtcaacataattggacgaaatatgttgactcagmttggytgtactttaaatttyccmattagcmmtrttgaractrtaccagtaacattaaagccaggaatggatggaccaaaggttaaacagtggccattaacagaagaaaaaataaaagcatta…
302754_2016_AE	cctcaaatcactctttggcagcgaccccttgtcacaataaaaatagaaggacagctaagagaagctctattagatacaggagcagatgatacagtattagaagayataaatttgccaggaaaatggaaaccaaaaatgatagggggaattggaggttttatcaaggtcaggcaatatgatcagatacttwtagaaatttgtggaaaaaaggctataggtacagtattagtaggacctacacctgtcaacataattggacgaaacatgttgactcagcttggttgtactttaaatttcccaattagtcctattgacactgtaccagtarcattaaagccaggaatggatggaccaaaggttaaacagtggccattaacagaagaaaaaataaaagcatta…
302788_2016_AE	cctcaaatcactctttggcracgacccmttgtcacaataaaagtaggaggacagatgagagaagctctattagatacaggagcagrtgatacagtattagaagatataaatttgccaggaaaatggaaaccaaaaatgatagggggaattggaggttttatcaaggtaaggcaatatgatcagatacttatagaaatttgtggaaagagggctataggtacagtgctagtaggacctacacctgtcaacataattggacgaaatatgttgactcagcttggttgtactttaaatttcccaattagtcctattgacactgtaccagtaacattaaaaccaggaatggatggaccaaaagttaaacagtggccattaacagaagaaaaaataaaagcatta…
302809_2016_AE	cctcaaatcactctttggcaacgaccccttgtcacaataaaaatagaaggacagataaaagaagctctattagatacaggagcagatgatacagtattagaagatataaatttgccagggagatggaaaccaaaaatgatagggggaattggaggttttatcaaggtaagacaatatgatcagataactatagaaatttgtgraaaaaaggctataggtacagtgttagtaggacctacacctatcaacataattggacgaaatatgttgactcagcttggttgtactttaaatttcccaattagccctattgacactgtaccagtaaaattaaagccaggaatggatggaccaaaggttaaacagtggccattaacagaagaaaaaataaaagcatta…
302829_2016_AE	cctcaaatcactctttggcaacgacccgttgtcgcagtaaaaatagaaggacagatgaaagaagctctattagatacaggagcagatgatacagtattagaagatataaatttgccaggaaaatggaaaccaaaaatgatagggggaattggaggttttatcaaagtaaggcaatatgatcagataactatagaaatttgtggaaaaaaagctataggtacagtgttagtaggacctacacctgtcaacataattggacgaaatatgttgactcagattggttgtactttaaatttcccaattagccctattgacactgtaccagtaaaattaaagccaggaatggatggaccaaaggttaaacagtggccattaacagaagaaaaaataaaagcatta…
302851_2016_AE	cctcaaatcactctttggcaacgaccccttgtcacaataaaaataggaggacagatgaaagaagctctattagatacaggagcagatgatacagtattagaagatataaatttgccaggaaaatggaagccaaaaatgataggggggattggaggttttatcaaagtaaggcaatatgatcagatacctatagaaatttgtggaaaaagggctataggtacagtgttagtaggacctacacctgtcaacataattggacgaaatatgttgactcagcttggttgtactttaaatttcccaattagtcctattgaaactgtaccagtaacattaaagccaggaatggatggaccaagagttaaacagtggccattaacagaagaaaaaataaaagcctta…
302852_2016_AE	cctcaaatcactctttggcaacgaccccttgtcacagtaaaaatagaaggacagataaaagaagctctattagatacaggggcagatgatacagtattagaagatataaatttaccaggaaaatggaaaccaaaaatgatagggggaattggaggttttatcaaggtaagacaatatgatcagatacttatagaaatttgtggcaaaaaggctataggtacagtgttagtaggacctacacctgtcaacataattggacgaaatatgttgactcagattggttgtactttaaatttcccaattagccctattgacactgtaccrgtaaagttaaagccaggaatggatggaccaaaagttaaacagtggccattaacagaggaaaaaataaaagcatta…
302855_2016_AE	cctcaaatcactctttggcaacgaccccttgtcacaataaaaataggaggacagatgagagaagctctattagatacaggagcagatgatacagtattagaagatataaatttgccaggaaaatggaaaccaaaaatgatagggggaattggaggttttatcaaagtaaggcaatatgatcagataactatagaaatttgtggaaaaaaggctataggtacagtgttagtaggacctacacctatcaacataattggacgaaatatgttgactcagcttggttgtactttaaatttcccaattagtcctattgacactgtaccwgtaacattaaagccaggaatggatggaccaaaggttaaacagtggccaytaacagaagaaaaaataaaagcatta…
302870_2016_AE	cctcaaatcactctttggcaacgaccccttgtcacaataaacataggaggacagatgaaagaagctctattagatacaggagcagatgatacagtattagaagatatagagttgccaggaaaatggaaaccaaaaatgatagggggaattggaggttttatcaaggtaaggcaatatgatcagatacttatagaaatttgtggaaaaaaggctataggtacagtgttagtaggacctacacctgtcaacataattggacgaaatatgttgactcagctcggttgtactttaaatttccccattagccctattgacactgtaccagtaacattaaagccaggaatggatggaccaaaagttaaacagtggccattaacagaagaaaaaataaaagcatta…
302873_2016_AE	cctcaaatcactctttggcaacgaccccttgtcacaataaaaatagcaggacagatgaaagaagctctattagatacaggagcagatgatacagtrttagaagatataaatttgccaggaaaatggaaaccaaaaatgatagggggaattggaggttttatcaaggtaaggcaatatgatcagatatctatagaaatttgtggaaaaarggctacaggtacagtgttagtaggacctacacctgtcaacataattggaagaaatatgttgactcagcttggttgtactttaaatttcccaattagccctattgacactgtaccagtaacattaaagccaggaatggatggaccaaaggttaaacagtggccattaacagargaaaaaataaaagcatta…
302874_2016_AE	cctcaaatcactctttggcaacgacctcttgttacagtaaaaataggaggacagatgaaagaagctctattagatacaggagcagatgatacagtattagaagatataaatttgccaggaaaatggaaaccaaaaatgatagggggaattggaggttttatcaaggtaaaacaatatgatcagatacttatagaaatctgtggaaaaaaggctataggtacagtgttagtaggacctacacctrtcaacataattggacgaaatatgttgactcagattggttgtactttaaattttccaattagtcctattgacacagtaccagtaacattaaagccaggaatggatggaccaaaggttaaacagtggccattaacagaagaaaaaataaaagcatta…
302928_2016_AE	cctcaaatcactctttggcaacgaccccttgtcccaataaaaataggaggacagatgagggaagctytattagatacaggagcagatgatacagtattagaagatataaatttgccaggaaagtggaaaccaaaaatgatagggggaattggaggttttatcaaggtaaggcaatatgatcagatamctatagaaatttgcgggaaaagggctataggttcagtgttagtaggacctacacctgtcaacataattggacgaaatatgttgactcagcttggttgtactttaaatttcccaattagtcctattgacactgtaccagtaacattaaagccaggaatggatggaccaaaggttaaacagtggccattaacaaaagaaaaaatagaagcatta…
302944_2016_AE	cctcaaatcactctttggcaacgaccccttgtcacaataaaaataggaggacagacaaaagaagctctattagatacaggagcagatgatacagttttagaagatataaatttgccaggaaaatggaaaccaaaaatgatagggggaattggaggttttatcaaggtaaagcaatatgatcagatacttatagaaatttgtggaaaaaaggctataggtacagtgttagtaggacctacacctatcaacataattggacgaaatatgttgactcagcttggttgtactttaaatttcccaattagccctattgacactgtaccagtaacattaaagccaggaatggatggaccaaaggttaaacagtggccattaacagaagaaaaaataaaagcacta…
302953_2016_AE	cctcaaatcactctttggcaacgaccccttgtcacagtaaaartaggaggacagttgaaagaagctctattagatacaggagcagatgatacagtattagaagatataaatttgccaggwaratggaaaccaaaaatgatagggggaattggaggttttatcaaggtaagacaatatgatcagatacttatagaaatttgtgggaaaaaagctataggtacagtgttagtaggacctacacctgtcaacataattggacgaaatatgttgactcagattggytgtactttaaatttcccaattagccctattgacactgtaccagtaacattaaagccaggaatggatggaccaaaggttaaacagtggccattaacagaagaaaaaataaaagcatta…
302988_2016_AE	cctcaaatcactctttggcaacgaccccttgttacaataaaaataggaggacagacaaaagaagctctattagatacaggagcagatgatacagtattagaagayataaatttgccaggaaaatggaaaccaaaaatgatagggggaattggaggttttatcaaggtaaagcaatatgatcagatacttatagaaatttgtggaaaaaaggctataggtacagtgttagtaggacctacacctatcaacataattggacgaaatatgttgactcagcttggttgtactttaaatttcccaattagccctattgacactgtaccagtaaaattaaagccaggaatggatggrccaaaggttaaacagtggccwttaacagaagaaaaaataaaagcacta…
302993_2016_AE	cctcaaatcactctttggcaacgaccccttgtcrcagtgaaaatagraggacagrtgaaagaagctctattagatacaggagcagatgatacagtattagaagatataaatttgccaggaaaatggaaaccaaaaatgatagggggaattggaggttttatcaaggtaagacaatatgatcagatacctatagaaatttgtgggaaaaaagctataggtacagtgttagtaggacctacacctgtcaacataattggacgaaatatgttgactcagcttggttgtactttaaattttccaattagccctattgacactgtaccagtaayattaaagccaggaatggatggaccaaaggttaaacagtggccattaacagaagaaaarataaaagcayta…
303115_2016_AE	cctcaaatcactctttggcaacgaccccttgtctcaataaaaataggaggacagataaaagaagctctattagatacaggagcagatgatacagtattagaagatataaatttgccaggaaaatggaaaccaaaaatgatagggggaattggaggytttatcaaggtaaggcaatatgatcagataatgatagaaatttgtggaaaaaaggctataggtacagtgttagtaggacctacaccyatcaacataattggacgaaatatgttgacycagcttggttgtactttaaatttcccaattagccctattgacactgtaccagtaaaattaaagccaggaatggatggaccaarggttaaacartggccattaacagaagaaaaaataaaagcatta…
322691_2016_AE	cctcaaatcactctttggcaacgaccccttgtcacagtaaaaatagaaggacaggtgaaagaagctctattagatacaggagcagatgatacggtattagaagaaataaatttgccaggaaaatggaaaccaaaaatgatagggggaattggaggttttatcaaagtaaggcaatatgatcagatacttatagaaatttgtggaaaaaaggctataggtacagtgttagtaggacccacacctgtcaacataattggacgaaatatgttgactcagattggttgtactttaaatttcccaattagccctattgacactgtaccagtaacattaaagccaggaatggatggaccaaaggttaaacagtggccattaacagaagaaaagataaaagcatta…
010302_2017_AE	~~~~~~~~~~~~~~~TGGCAACGACCCCTTGTCACAATAAAAATAGGAGGACAAATGAAAGAAGCTCTATTAGATACAGGAGCAGATGATACAGTATTAGAAGATATAAATTTACCAGGAAAATGGAAACCAAAAATGATAGGGGGAATTGGAGGTTTTATCAAAGTAAGGCAGTATGATCAGATACYTATAGAAATTTRTGGAAAAAAGGCTATAGGTACAGTGTTAGTAGGACCTACACCTGTCAACATAATTGGACGAAATATGTTGACTCAGCTTGGTTGTACTTTAAATTTCCCAATTAGCCCTATTGACACTGTACCAGTAACATTAAAGCCAGGAATGGATGGACCAAAGGTTAAACAGTGGCCATTAACAGAAGAAAAAATAAAAGCATTA…
011016_2017_AE	~~~~~~~~~~~~~~~TGGCAACGACCCCTTGTCACAATAAAAATAGAAGGACAGCTGAGAGAGGCTCTATTAGATACAGGAGCAGATGATACAGTATTAGAAGAGATAAATTTGCCARGAAAATGGAAACCAAAAATGATAGGGGGAATTGGAGGTTTTATCAAGGTAAGGCAATATGATCAGATACTTATAGAAWTTTGTGGGAAAAAGGCTATAGGTACAGTGTTAGTAGGACCTACACCTGTCAACATAATTGGACGAAATATGTTGACTCAGCTTGGTTGTACTTTAAATTTCCCAATTAGCCCTATTGACACTGTACCAGTAAAATTAAAGCCAGGAATGGATGGACCAAAGGTTAAACAATGGCCATTAACAGAAGAAAAAATAAAAGCATTA…
011007_2017_AE	CCTCAAATCACTCTTTGGCAACGACCCCTTGTCCCAATAAAAATAGGAGGACAGATAAAAGAAGCTCTATTAGATACAGGAGCAGATGATACAGTATTAGAAGATATAAATTTGCCAGGAAAATGGAAACCAAAAATGATAGGGGGAATTGGAGGTTTTATCAAGGTAAGGCAATATGATCAGATAKTTATAGAAATTTGTGGAAAAAAGGCTATAGGTACAGTGTTAGTAGGACCTACACCTATCAACATAATTGGACGAAATATGTTGACTCAGCTTGGTTGTACTTTAAATTTCCCAATTAGCCCTATTGACACTGTACCAGTAAAATTAAAGCCAGGAATGGATGGACCAAAGGTTAAACAGTGGCCATTAACAGAAGAAAAAATCAAAGCGTTA…
011010_2017_AE	~~~~~~~~~~~~~~~TGGCAACGACCCCTTGTCACAATAAAAATAGAAGGACAGcTAAGAGAGGCTCTATTAGATACAGGAGCAGATGATACAGTATTAGAAGATATAAATTTGCCAGGAAAATGGAAACCAAAAATGATAGGGGGAATTGGAGGTTTTATCAAAGTAAGGCAATATGATCAGATACTTATAGAAATTTGTGGAAAAAAGGCTGTAGGTACAGTGTTAGTAGGACCTACACCTGTCAACATAATTGGACGAAATATGTTGACTCAGCTTGGTTGTACTTTAAATTTCCCAATYAGCCCTATTGACACTGTRCCAGTAGCATTAAAGCCAGGAATGGATGGACCAAARGTTAAACAGTGGYCATTAACAGMAGAAAAAATAAAAGCATTA…
303136_2017_AE	CCTCAAATCACTCTTTGGCAACGACCCCTTGTCACAGTAAAAATAGAGGGACAGATGAGAGAGGCTCTATTAGATACAGGAGCAGATGATACAGTATTAGAAGAGATAAATTTGCCAGGAAAATGGAAACCAAAAATGATAGGGGGAATTGGAGGTTTTATCAAAGTAAGGCAATATGATCAGATACCTATAGAAATTTGTGGAAAAAAGGCTATAGGTACAGTGTTAGTAGGACCTACACCTGTCAACATAATTGGACGAAATATGTTGACTCAGCTTGGTTGTACTTTAAATTTCCCAATTAGCCCTATTGACACTGTACCAGTAACATTAAAGCCAGGAATGGATGGACCAAAGGTTAAACAGTGGCCATTAACAGAAGAAAAAATAAAAGCATTA…
303140_2017_AE	CCTCAAATCACTCTTTGGCAACGACCCCTTGTCACAGTAAAAGTAGGAGGACAGATGAAAGAAGCTCTATTAGATACAGGAGCAGATGATACAGTATTAGAAGAAATAAATTTGCCAGGAAAATGGAAACCAAAAATGATAGGGGGAATTGGAGGTTTTATCAAGGTAAGGCAATATGATCAGGTACTTATAGAAATTTGTGGAAAAAAAGCTAYRGGTACAGTGTTAGTGGGACCTACACCTGTTAACATAATTGGACGAAATATGTTGACTCAGATTGGTTGTACTTTAAATTTCCCAATTAGTCCTATTGACACTGTACCAGTAAMATTAAAGCCAGGAATGGATGGACCAAAGGTTAAACAGTGGCCATTAACAGMAGAAAAAATAAAAGCATTA…
011004_2017_AE	~~~~~~~~~~~~~~~TGGCAACGACCCCTTGTCACAATAAGAATAGGAGGACAGATAAAAGAAGCTCTATTAGATACAGGAGCAGATGATACAGTATTAGAGGATATAAATTTGCCAGGAAAATGGAAACCAAAAATGATAGGGGGAATTGGAGGTTTCATCAAAGTAAGGCAATATGATCAGATAACTATAGAAATTTGTGGRAAAAAGGCRATAGGTACAGTGTTAGTAGGACCTACACCTATCAACATAATTGGACGAAATATGTTGACTCAGCTTGGTTGTACTTTAAATTTYCCAATYAGYCCTATTGAAACTGTACCAGTAAAATTAAAGCCAGGAATGGATGGACCAAAGGTTAAACAGTGGCCATTAACAGAAGAAAAAATAAAAGCATTA…
303139_2017_AE	CCTCAGATCACTCTTTGGCAACGACCCCTTGTCACAATAAAAATAGGAGGACAGATGAGAGAAGCTCTATTAGATACAGGAGCAGATGATACAGTATTAGAAGATATAAATTTGCCAGGAAAATGGAAACCAAAAATGATAGGGGGAATTGGAGGTTTTATCAAAGTAAGGCAATATGATGAGATAGCTATAGAAATTTGTGGAAAAAAGGCTATAGGTACAGTATTAGTAGGACCTACACCTATCAACATAATTGGACGAAATATGTTGACTCAGCTTGGTTGTACTTTAAATTTCCCAATTAGCCCTATTGACACTGTACCAGTAACATTAAAACCAGGAATGGATGGACCAAAAGTTAAACAGTGGCCATTAACAGAAGAAAAAATAAAGGCACTA…
303170_2017_AE	CCTCAGATCACTCTTTGGCAACGACCCCTTGTCACAGTAAAAATAGGGGGACAGCTGAAAGAAGCTCTATTAGATACAGGAGCAGATGATACAGTATTAGAAGAGATAAATTTGCCAGGAAAATGGARACCAAAAATGATAGGGGGAATTGGAGGTTTTATCAAAGTAAGGCAATATGATCAGATACTTATAGAAATTTGTGGAAAAAAAGCTATAGGTACAGTGTTAGTAGGACCTACACCTATCAACATAATTGGACGAAATATGTTGACTCAGATTGGTTGTACTTTAAATTTCCCAATTAGTCCTATTGACACTGTACCAGTAACATTAAAGCCAGGAATGGATGGCCCAAAGGTTAAACAGTGGCCATTAACAGAAGAAAAGATAAAAGCATTA…
303150_2017_AE	CCTCAAATCACTCTTTGGCAACGACCAGTTGTCACAGTAAAAGTAGAAGGACAGATAAAAGAAGCTCTATTAGATACAGGAGCAGATGATACAGTATTAGAAGATATAAATTTGCCAGGAAAATGGAAACCAAAAATGATAGGGGGAATTGGAGGTTTTATCAAGGTAAGGCAATATGATCAGATAACTATAGAAATTTGTGGGAAAAAGGCTATAGGTACAGTGTTAGTAGGACCTACACCTGTCAACATAATTGGACGGAATATGTTGACTCAGATTGGTTGTACTTTAAATTTCCCAATTAGCCCTATTGACACTGTACCAGTAACATTAAAGCCAGGAATGGATGGACCAAAGGTTAAACAATGGCCATTAACAGAAGAAAAAATAAAAGCATTA…
130002_2017_AE	~~~~~~~~~~~~~~~TGGCAACGACCCMTTGTCACAGTAAAAATAGRAGGACAGRTAAAAGAAGCTCTATTAGATACAGGAGCAGATGATACAGTATTAGAAGAKATAAATTTGCCAGGAAAATGGAAACCAAAAATGATAGGGGGAATTGGAGGTTTTATCAAAGTAAGRCAATATGATCAGATACTTATAGAAATTTGTGGAAAAAAGGCTATAGGTACAGTGTTAGTAGGACCTACACCTGTCAACATAATTGGACGAAATATGTTGACTCAGATTGGTTGTACTTTAAATTTCCCAATTAGTCCTATTGACACTGTGCCAGTAACATTAAARCCAGGAATGGATGGACCAAAGGTTAAACARTGGCCATTAACAAAAGAAAAAATAGAAGCATTA…
303172_2017_AE	CCTCAAATCACTCTTTGGCAACGACCCCTTGTCACAGTAAAAATAGGAGGACAGGTGAAAGAAGCTCTATTAGACACAGGGGCAGATGATACAGTATTAGAAGATATAAATTTGCCAGGAAAATGGAAACCAAAAATGATAGGGGGAATTGGAGGTTTTATCAAGGTAAAGCAATATGATCAGATACTTATAGAAATTTGTGGAAAAAAGGCTATAGGTACAGTGTTAGTAGGACCTACACCTGTCAACATAATTGGACGAAATATGTTGACTCAGATTGGTTGTACTTTAAATTTTCCAATTAGTCCTATTGACACTGTACCAGTAAAATTAAAGCCAGGAATGGATGGACCAAAAGTTAAACAGTGGCCATTAACAGAAGAAAAAATAAAAGCATTA…
303153_2017_AE	CCTCAAATCACTCTTTGGCAACGACCTCTTGTCACAGTAAAAGTAGGAGGAGAGATGAGAGAAGCTCTATTAGATACAGGAGCAGATGATACAGTACTAGAAGATATAAATTTGCCAGGAAAATGGAAACCAAAAATGATAGGGGGAATTGGAGGTTTTATCAAGGTAAAGCAATATGATCAGATAGTTATAGAAATTTGTGGAAAAAAGGCCATAGGTACAGTGTTAGTAGGACCTACACCTATCAATATAATTGGGCGAAATATGTTGACTCAGCTTGGTTGTACTTTAAATTTCCCAATYAGTCCTATTGACACTGTACCAGTAACATTAAAGCCAGGAATGGATGGACCAAAAGTTAAACAGTGGCCATTAACAGCAGAAAAAATAAAAGCATTA…
011706_2017_AE	~~~~~~~~~~~~~~~TGGCAACGACCTMTTGTCACAGTAAAAATAGGAGGACAGCTRAAAGAAGCTCTATTAGATACAGGAGCAGATGATACAGTATTTGAAGAGATAAATTTGCCAGGAAAATGGAAACCAAAAATGATAGGGGGAATTGGAGGTTTTATCAAAGTAAGGCAATATGATCAGATACTTATAGAAATTTGTGGAAAAARGGCCATAGGTACAGTGTTRGTAGGACCTACACCTGTCAACATAATTGGACGAAATATGTTGACCCAGGTTGGTTGTACTTTAAATCTCCCAATTAGCYCTATTRACACTGTACCAGTAAAMTTAAAGCCAGGAATGGATGGACCAAGGGTTAAACAGTGGCCATTAACAGAAGAAAAAATAAAAGCATTA…
011703_2017_AE	~~~~~~~~~~~~~~~TGGCAACGACCTATTGTCACAGTAAAAATAGAAGGACAGATAAGAGAAGCTCTATTAGACACAGGAGCAGATGATACAGTATTAGAAGATATAAATTTGCCAGGAAAATGGAAACCAAAAATGATAGGGGGAATTGGAGGTTTTATCAAGGTAAAACAATATGATCAGATACWTATAGAAATTTGTGGAAAAAGGGCTATAGGTACAGTGTTAGTAGGACCTACACCTGTCAACATAATTGGACGAAATATGTTGACTCAGATTGGTTGTACYTTAAATTTYCCAATYAGYCCTATTGAAACTGTACCAGTAAAATTAAAGCCAGGAATGGATGGMCCAAAGGTTAAACAATGGCCATTGACAAAAGAGAAAATAGAAGCATTA…
303143_2017_AE	cctcaaatcactctttggcaacgaccccttgtcacaataaaaatagaaggacagatgaaagaagctytattagatacaggagcagatgatacagtattagaagatatagatttgccaggaaaatggaaaccaaaaatgatagggggaattggaggttttatcaaggtaaggcaatatgatcagatacttatagaaatttgtggaaaaagggctataggtacagtgttagtaggacctacacctgtcaacataattggacgaaatatgttgactcarcttggttgtactytaaatttcccaattagtcctattgacactgtaccagtaacattaaagccaggaatggatggaccaaaggttaaacagtggccattaacagaagaaaaaataaaagcatta…
130004_2017_AE	~~~~~~~~~~~~~~~TGGCAACGACCCCTTGTCTCAGTAAAAATAGGAGGACAGATAAAAGAAGCTCTGTTAGATACAGGAGCAGATGATACAGTATTAGAAGATATAGATTTACCAGGAAAATGGAAACCAAAAATGATAGGGGGAATTGGAGGTTTTATCAAAGTAAGGCAATATGATCAGATAACTATAGAAATTTGTGGGAAAAAGGCTATAGGTACAGTGTTAGTAGGACCTACACCTGTCAACATAATTGGACGAAATATGTTGACTCAGATTGGTTGTACTTTAAATTTCCCAATTAGCCCTATTGACACTGTACCAGTAACATTAAAGCCAGGAATGGATGGACCAAAGGTTAAACAGTGGCCATTAACAGAAGAAAAAATAAAAGCATTA…
303146_2017_AE	CCTCAAATCACTCTTTGGCAACGACCCCTTGTCCCAATAAAAATAGGAGGACAGATAAAAGAAGCTCTATTAGATACAGGAGCAGATGATACAGTATTAGAAGATATAAATTTGCCAGGAAAATGGAAACCAAAAATGATAGGGGGAATTGGAGGTTTTATCAAGGTAAGGCAATATGATCAGATACCTATAGAAATTTGTGGAAAAAAGGCTATAGGTACAGTGTTAGTAGGACCTACACCTGTCAACATAATTGGACGAAATATGTTGACTCAGCTTGGCTGTACTTTAAATTTCCCAATTAGCCCTATTGACACTGTACCAGTAACATTAAAGCCAGGAATGGATGGACCAAAGGTTAAACAGTGGCCATTAACAGAAGAAAAAATAAAAGCATTA…
303253_2017_AE	CCTCAAATCACTCTTTGGCAACGACCCCTTGTCACAGTAAAAATAGGAGGACAGATGAAGGAAGCTTTATTAGATACAGGAGCAGATGATACAGTATTAGAAGATATAAATTTGCCAGGAAAATGGAAACCAAAAATGATAGGGGGAATTGGAGGTTTTATCAAGGTAAGACAATATGATCAGATACTCATAGAAATTTGTGGAAAAAAGGCTATAGGTACAGTGTTAGTAGGACCTACACCTATCAACATAATTGGACGAAATATGTTGACTCAGCTTGGTTGTACTTTAAATTTCCCAATTAGCCCTATTGACACTGTACCAGTAACATTAAAGCCAGGAATGGATGGACCAAAGGTTAAACAGTGGCCATTAACAGAAGAAAAAATAAAAGCATTA…
325019_2017_AE	CCTCAAATCACTCTTTGGCAACGACCCCTTGTCACAATAAAAATAGAAGGACAGATGAAAGAAGCTCTATTAGATACAGGAGCAGATGATACAGTATTAGAAGATATAGATTTGCCAGGAAAATGGAAACCAAAAATGATAGGGGGAATTGGAGGTTTTATCAAGGTAAGGCAATATGATCAGATACTTATAGAAATTTGTGGAAAAAGGGCTATAGGTACAGTGTTAGTAGGACCTACACCTGTCAACATAATTGGACGAAATATGTTGACTCAGCTTGGTTGTACTTTAAATTTCCCAATTAGTCCTATTGACACTGTACCAGTAACATTAAAGCCAGGAATGGATGGACCAAAGGTTAAACAGTGGCCATTAACAGAAGAAAAAATAAAAGCATTA…
012313_2017_AE	~~~~~~~~~~~~~~~TGGCARCGACCCCTTGTCACAGTAAAAATAGGAGGRSARATGAAAGAAGCTCTATTAGATACAGGAGCAGATGATACAGTATTAGAAGATATAAATTTGCCAGGAAAATGGAGACCAAAAATGATAGGGGGAATTGGAGGTTTTATCAARGTAAAGCAATATGATCAGATACCTATAGAAATTTGTGGAAAAAGRGCTGTAGGTACAGTGTTAGTAGGACCWACACCTGTCAACATAATTGGAMGAAATATGTTGACTCAGATTGGTTGTACTTTAAATTTCCCAATTAGCCCTATTGACACTGTACCAGTAACATTAAAGCCAGGAATGGATGGACCAAAGGTTAAACAGTGGCCATTAACAGAAGAAAAAATAAAAGCATTA…
012307_2017_AE	~~~~~~~~~~~~~~~TGGCAACGACCCCTTGTCACAATAAAAATAGGGGGACAGATGAGAGAAGCTCTATTAGATACAGGAGCAGATGATACAGTATTAGAAGATATAAATTTGCCAGGAAAATGGAAACCAAGAATGATAGGGGGAATTGGAGGTTTTATCAAGGTAAaGCAATATGATCAAATACTTATAGAAATTTGTGGAAAAAARGCTATAGGTACAGTGTTAGTAGGACCTACACCTATCAACATAATTGGACGAAATATGTTGACTCAGATTGGTTGTACTTTAAATTTCCCAATTAGCAATATTGACACTGTACCAGTAACATTAAAGCCAGGAATGGATGGACCAAGGGTTAAACAGTGGCCATTRACAGAAGAAAAAATAAARGCACTA…
303176_2017_AE	CCTCAAATCACTCTTTGGCAACGACCCCTTGTCACAGTAAAAATAGAAGGACAGGTGAAAGAAGCTCTATTAGATACAGGAGCAGATGATACGGTATTAGAAGAAATAAATTTGCCAGGAAAATGGAAACCAAAAATGATAGGGGGAATTGGAGGTTTTATCAAAGTAAGGCAATATGATCAGATACTTATAGAAATTTGTGGAAAAAAGGCTATAGGTACAGTGTTAGTAGGACCCACACCTGTCAACATAATTGGACGAAATATGTTGACTCAGATTGGTTGTACTTTAAATTTCCCAATTAGCCCTATTAACACTGTACCAGTAACATTAAAGCCAGGAATGGATGGACCAAAGGTTAAACAGTGGCCATTAACAGAAGAAAAGATAAAAGCATTA…
303157_2017_AE	CCTCAAATCACTCTTTGGCAACGACCCCTTGTTACAATAAAAATAGGGGGACAGATRAAAGAAGCTCTATTAGATACAGGAGCAGATGATACAGTATTAGAAGATATAAATTTGCCAGGAAAATGGAAACCAAAAATGATAGGGGGAATTGGAGGTTTTATCAAGGTAAGGCAATATGATCAGGTAACTATGGAAATTTGTGGAAAAAGGGCTATAGGTACAGTGTTAGTAGGACCTACACCTGTCAACATAATTGGACGAAATCTGTTGACTCAGATTGGTTGTACTTTAAATTTCCCAATTAGCCCTATTGACACTGTACCAGTAACATTAAAGCCAGGAATGGATGGACCAAAGGTTAAACAGTGGCCATTAACAGAAGARAAAATAAAAGCATTA…
303332_2017_AE	~~~~~~~~~~~~~~~TGGCAACGACCCCTTGTYACAATAAAAATAGGAGGACAGATGAAAGAAGCTCTATTAGATACAGGAGCAGATGATACAGTATTAGAAGATATAAATTTGCCARGAAAATGGAAACCAAAAATGATAGGGGGAATTGGAGGTTTTATCAAAGTAAGGCAATATGATSAGATACTTATAGAAATTTGTGGAAAAAGGGCTATAGGTACAGTGTTAGTAGGACCTACACCTGTCAACATAATTGGACGAAATATGTTGACTCAGATTGGTTGTACTTTAAATTTCCCAATTAGCCCTATTGAMACTGTACCAGTAAAATTAAAGCCAGGAATGGATGGACCAAAGGTTAAACAGTGGCCATTAACAGAAGAAAAAATAAAAGCATTA…
012317_2017_AE	~~~~~~~~~~~~~~~TGGCAACGACCCCTTGTCTCAATAAAAGTAGGAGGACAGATAAAAGAAGCTCTATTAGATACAGGAGCAGATGATACAGTATTAGAAGATATAAATTTGCCAGGAAAATGGAAACCAAAAATGATAGGGGGAATTGGAGGTTTTATCAAGGTAAGGCAATATGATCAGATATCTATAGAAATTTGTGGRAAAAAGGCCATAGGTACAGTGTTAGTAGGACCTACACCTATCAACATAATTGGACGAAATATGTTGACTCAGCTTGGTTGTACTTTAAATTTCCCAATTAGCCCTATTGAYACTGTACCAGTAAAATTAAAGCCAGGAATGGATGGACCAAAGGTTAAACAGTGGCCATTAACAGAAGAAAAAATAAAAGCATTA…
303152_2017_AE	CCTCAAATCACTCTTTGGCAACGACCCCTTGTCACAGTAAAAATAGGAGGACAGATGAAAGAAGCTCTATTAGATACAGGAGCAGATGATACAGTATTAGAAGAGATAAATTTGCCAGGAAAATGGAAACCAAAAATGATAGGGGGAATTGGAGGTTTTATCAAAGTAAGACAGTATGATCAGATAACTATAGAAATTTGTGGAAAAAAGGCTATAGGTACAGTGTTAGTGGGACCTACACCTGTCAACATAATTGGACGAAATATGTTGACTCAGATTGGTTGTACTCTAAATTTCCCAATTAGCCCTATTGACACTGTACCAGTAACATTAAAGCCAGGGATGGATGGACCAAAGGTTAGACAATGGCCATTAACAGAAGAAAAAATAAAAGCATTA…
020705_2017_AE	CCTCAAATCACTCTTTGGCAACGACCCCTTGTCACAGTAAAAGTAGGAGGACAGATGAAAGAAGCTCTATTAGATACAGGAGCAGATGATACAGTATTAGAAGATATAAATTTGCCAGGAAARTGGAAACCAAAAATGATAGGGGGAATTGGAGGTTTTATCAAAGTAAAGCAATATGATCAGATACTTATAGAAATTTGTGGAAAAAAGGCTATAGGTTCAGTGTTAGTAGGRCCTACACCTGTCAACATAATTGGACGAAATATGTTGACTCAGCTTGGTTGTACTTTAAATTTCCCAATTAGCCCTATTGACACTGTACCAGTAACATTAAAGCCAGGAATGGATGGACCAAAGGTTAAACAGTGGCCACTAACAGAAGAAAAAATAAAAGCATTA…
303147_2017_AE	CCTCAAATCACTCTTTGGCAGCGACCCCTTGTCACAATAAAAGTAGGAGGACAGATAAAAGAAGCTCTATTAGATACAGGAGCAGATGATACAGTATTAGAAGATATAAATTTGCCAGGAAAATGGAAACCAAAAATGATAGGGGGAATTGGAGGTTTTATCAAGGTAAGGCAATATGATCAGATATCTATAGAAATTTGTGGAAAAAAGGCTATAGGTACAGTGTTAGTAGGACCTACACCTGTCAACATAATTGGACGAAATATGTTGACTCAGCTTGGCTGTACTTTAAATTTCCCAATTAGCCCTATTGACACTGTACCAGTAACATTAAAGCCAGGAATGGATGGACCAAAGGTTAAACAGTGGCCATTAACAGAAGAAAAAATAAAAGCATTA…
020713_2017_AE	~~~~~~~~~~~~~~~TGGCAACGACCCCTTGTCACAGTAAAAATAGGAGGACAAATGAGAGAAGCTCTATTAGATACAGGAGCAGATGATACWGTATTAGAAGARATAAATTTGCCAGGAAAATGGAAACCAAAAATGATAGGGGGAATTGGAGGTTTTATCAAGGTAAGGCAATATGATCAGATACTTATAGAAATTTGTGGAAAAAAGGCTATAGGTACAGTGTTAGTAGGACCTACACCTGTCAACATAATTGGACGAAATATGTTGACTCAGCTTGGTTGTACTTTAAATTTCCCAATTAGCCCTATTGACACTGTACCAGTAACATTAAARCCAGGAATGGATGGACCAAAGGTTAAACAGTGGCCATTAACAGAAGAAAAAATAAAAGCATTA…
020712_2017_AE	~~~~~~~~~~~~~~~TGGCAACGACCCCTTGTCACAATAAAAATAGGAGGACAGATAAAAGAAGCTCTATTAGATACAGGGGCAGATGATACAGTATTAGAAGATATAAATTTGCCAGGAAAATGGAAACCAAAAATGATAGGGGGAATTGGAGGTTTTATCAAAGTAAGACAATATGATCAGATAACTATAGAAATTTGTGGAAAAAAGGCTGTAGGTACAGTGTTAGTAGGACCTACACCTATCAACATAATTGGACGAAATATGTTGACTCAGCTTGGTTGTACTTTAAATTTCCCAATTAGTCCTATTGACMCTGTACCAGTAACATTAAAGCCAGGAATGGATGGACCAAAAGTTAAACAGTGGCCATTAACAGAAGAAAAAATAAAAGCATTA…
303190_2017_AE	CCTCAAATCACTCTTTGGCAACGACCCCTTGTCACAGTAAAAATAGGAGGACAGATGAGAGAAGCTCTATTAGATACAGGAGCAGATGATACAGTATTAGAAGATATAAATTTGCCAGAAAAATGGAAACCAAAAATGATAGGGGGAATTGGAGGTTTTATCAAGGTAAGGCAATATGATCAGATACTTATAGAAATTTGTGGGAAAAAAGCTATAGGTACAGTGTTAGTAGGACCTACACCTATCAACATAATTGGACGAAATATGTTGGCTCAGATTGGCTGTACTTTAAATCTCCCAATTAGCCCTATTGACACTGTACCAGTAACATTAAAGCCAGGAATGGATGGACCAAAGGTTAAACAGTGGCCATTAACAGAAGAAAAAATAAAAGCATTA…
021429_2017_AE	CCTCAAATCACTCTTTGGCAACGACCCCTTGTCTCAATAAAAATAGGAGGACAGATAAGAGAAGCTCTATTAGATACAGGAGCAGATGATACAGTATTAGAAGATATAAATTTGCCAGGAAAATGGAAACCAAAAATGATAGGGGGAATTGGAGGTTTTATCAARGTAAGGCAATATGATCAGATAAGTATAGAAATTTGTGGAAAAAAGGCTATAGGTACAGTGCTAGTAGGACCTACACCTATAAACATAATTGGACGAAATATGTTGACTCAGCTTGGTTGTACTTTAAATTTCCCAATTAGCCCTATTGACACTGTACCAGTAAAATTAAAGCCAGGAATGGATGGACCAAAGGTTAAACAGTGGCCATTAACARAAGAAAAAATAAAAGCATTA…
021424_2017_AE	~~~~~~~~~~~~~~~TGGCAACGACCCCTTGTCTCAATAAAAATAGGAGGACAGGTGAAAGAAGCTCTATTAGATACAGGAGCAGATGATACAGTATTAGAAGAGATAAATTTGCCAGGAAAATGGAAACCAAAAATGATAGGGGGAATTGGAGGTTTTATCAAAGTAAGGCAATATGATCAGATACCTATAGAAATTTGTGGAAAAARRGCWATAGGTACAGTGTTAGTAGGACCTACACCTGTCAACATAATTGGACGAAACATGTTGACTCAGCTTGGTTGTACTTTAAATTTCCCAATTAGCCCTATTGACACTGTACCAGTAAMATTAAAGCCAGGAATGGATGGRCCAAAGGTTAAACARTGGCCATTAACAGAAGAAAAAATAAAWGCATTA…
021408_2017_AE	~~~~~~~~~~~~~~~TGGCAACGACCCCTTGTCACAATAAAAATAGGAGGACARATGAAAGAAGCTCTATTAGATACAGGAGCAGATGATACAGTATTAGAAGATATAAATTTGCCAGGAAAATGGAAACCAAAAATGATAGGGGGAATTGGAGGTTTTATCAAGGTAAGGCAATATGATCAGATAvYTATAGAAATTTGTGGAAAAAAGGCTATAGGTACAGTGTTAGTAGGACCTACACCTGTCAACATAATTGGACGAAATATGTTGACTCAGcTTGGTTGTACTTTAAATTTCCCAATTAGCCCTATTGACACTGTACCAGTAACATTAAAGCCAGGAATGGATGGACCAAAGGTTAAACAGTGGCCRTTAACAGAAGAAAAAATAAAAGCATTA…
021428_2017_AE	~~~~~~~~~~~~~~~TGGCAACGACCCCTTGTcACAATAAAAATAGGaGGACAGATAAAAGAAgCTCTATTAGATACAGGAGCAGATGATACAGTATTAGAAGATATAAATTTGCCAGGAAAATGGAAACCAAAAATGATAGGGGGAATTGGAGGTTTTATCAARGTAAGGCAATATGATCAGATARCTATAGAAATTTGTGGRAAAAGRGCTATAGGTACAGTGTTAGTAGGACCTACACCTATCAACATAATTGGACGAAATATGTTGACTCARCTTGGTTGTACTTTAAATTTCCCAATTAGYCCTATTGACACTGTACCAGTAAAATTAAAGCCAGGAATGGATGGACCAAAGGTTAAACAGTGGCCATTAACAGAAGAAAAAATAAAAGCATTA…
021406_2017_AE	~~~~~~~~~~~~~~~TGGCAACGACCCCTTGTCACAGTAAAAATAGGAGGACAGATGATAGAAGCTCTATTAGATACAGGAGCAGATGATACAGTATTAGAAGATATAAATTTGCCAGGAAAATGGAAACCAAAAATGATAGGGGGAATTGGAGGTTTTATCAAAGTAAGGCAATATGATCAGATACTTATGGAAATTTGTGGAAAAAAGGCTATAGGTACAGTGTTAGTAGGACCTACACCTGTCAACATAATTGGACGAAATATGTTGACTCAGATTGGTTGTACTTTAAATTTCCCAATTAGCCMTATTGAMACTGTGCCAGTAACATTAAAGCCAGGAATGGATGGACCAAAGGTTAAACAGTGGCCATTAACAGAAGAAAAGATAAAAGCATTA…
303161_2017_AE	CCTCAAATCACTCTTTGGCAACGACCCATTGTCCCAGTAAAAATAGGAGGACAGATAAAAGAAGCTCTATTAGATACAGGAGCAGATGATACAGTATTAGAAGATATACATTTGCCAGGAAAATGGAAACCAAAAATGATAGGGGGAATTGGAGGTTTTATCAAGGTGAAGCAATATGATCATATACTTATAGAAATTTATGGAAAAAAGGCTATAGGTACAGTATTAGTAGGACCTACACCTGTCAACATAATTGGACGAAATATGTTGACTCAGATTGGTTGTACTTTAAATCTACCAATTAGCCCTATTGACACTGTACCAGTAACATTAAAGCCAGGAATGGATGGACCAAAGGTTAAACAGTGGCCATTAACAGAAGAAAAAATAAAAGCATTA…
303192_2017_AE	~~~~~~~~~~~~~~~TGGCAACGACCCCTTGTCACAGTAAAAATAGGAGGACAGATGAAAGAAGCTCTATTAGATACAGGAGCAGATGATACAGTATTAGAAGATATAAATTTGCCAGGAAAATGGAAGCCAAAAATGATAGGGGGAATTGGAGGTTTTATCAAGGTAAGGCAATATGATCAGGTACTTATAGAAATTTGTGGAAAAAAGGCTATAGGTACAGTGTTAGTAGGACCTACACCTGTCAACATAATTGGACGAAATATGTTGACTCAGATTGGTTGTACTTTAAATTTCCCAATTAGCCCTATTGACACTGTACCAGTAACATTAAAGCCAGGAATGGATGGACCAAAGGTTAAACAGTGGCCATTAACAGAAGAAAAAATAAAAGCATTA…
303213_2017_AE	cctcaaatcactctttggcaacgaccccttgtctcaataaaagtagaaggacagataaaagaagctctattagatacaggagcagatgatacagtgttagaagatataaatttgccaggaagatggaaaccaaaaatgatagggggaattggaggttttatcaaggtaaggcaatatgatcagatatctatagaaatttgtggaaaaaaggccatcggtacagtgttagtaggacctacacctatcaacataattggacgaaatatgttgactcagcttggttgtactttaaatttcccaattagccctattgacactgtaccagtaaaattaaagccaggaatggatggaccaaaggttaaacagtggccattaacagcagaaaaaataaaagcatta…
303282_2017_AE	CCTCAAATCACTCTTTGGCAACGACCCCTTGTCGCAATAARAATAGGAGGACAGCTGAAAGAAGCTCTGTTAGATACAGGAGCAGATGATACAGTATTAGAAGATATAAATTTGCCAGGAAAATGGAAACCAAAAATGATAGGGGGAATTGGGGGTTTTATCAAGGTAAGGCAATATGATCAGATACCTATAGAAATTTGTGGAAAAAAGGCTATAGGTACAGTGTTAGTAGGACCTACACCTGTTAACATAATTGGACGAAATATGTTGACTCAGCTTGGTTGTACTTTAAATTTCCCAATCAGTCCTATTGACACTGTACCAGTAACATTAAAGCCAGGAATGGATGGACCAAAGGTTAAACAGTGGCCATTAACAGAAGAAAAAATAAAAGCATTA…
021414_2017_AE	~~~~~~~~~~~~~~~TGGCAACGACCCCTTGTCACAGTAAAAATAGGAGGACAGATAAAAGAAGCTCTGTTAGATACAGGAGCAGATGATACAGTATTAGAAGATATAGATTTACCAGGAAAATGGAAACCAAAAATGATAGGGGGAATTGGAGGTTTTATCAAAGTAAGGCAATATGATCAGATACYTATAGAAATTGGTGGAAAAAAGGCTATAGGTACAGTGTTAGTAGGACCTACACCTGTCAACATAATTGGAMGAAATATGTTGACTAAGATTGGTTGTACTTTAAATTTCCCAATTAGCCCTATTGACACTGTACCAGTAACATTAAAGCCAGGAATGGATGGACCAAAGGTTAAACAGTGGCCATTAACAGAAGAAAAAATAAAAGCATTA…
021413_2017_AE	~~~~~~~~~~~~~~~TGGCAACGACCCCTTGTCACAGTAAAAATAGGRGGACAAATAAAAGAAGCTCTATTAGATACAGGAGCAGATGATACAGTATTAGAAGARATAAATTTGCcAGGAAAATGGAAACCAAAAATGATAGGGGGAATTGGAGGTTTTATCAAGGTAAGRCAATATGATCAGATACTTATAGAAATTTGTGGAAAAARGGCTATAGGTACAGTGTTAGTAGGACCTACACCTATCAACATAATTGGACGAAATATGTTGACCCAGATTGGTTGTACTTTAAATTTCCCAATTAGTCCTATTGACACTGTACCAGTATCATTAAAGCCAGGAATGGATGGACCAAAGGTTAAACAGTGGCCATTAACAAAAGAAAAAATAGAAGCATTA…
021412_2017_AE	~~~~~~~~~~~~~~~TGGCAACGACCCCTTGTCACAGTAAAAATAGGAGGACAAATAATAGAAGCTCTATTAGATACAGGAGCAGATGATACAGTATTAGAAGAGATAAATTTGCCAGGRAAATGGAAACCAAAAATGATAGGGGGAATTGGAGGTTTTATCAARGTAAGGCAATATGATCAGATACTTATAGAAATTTGTGGAAAAAAGGCTATAGGTACAGTGTTAGTAGGACCTACACCTATCAACATAATTGGACGAAATATGTTGACCCAGATTGGTTGTACTTTAAATTTCCCAATTAGTCCTATTGACACTGTACCAGTATCATTAAAGCCAGGAATGGATGGACCAAAGGTTAAACAGTGGCCATTAACAAAAGAAAAAATAGAAGCATTA…
021411_2017_AE	~~~~~~~~~~~~~~~TGGCAACGACCCCTTGTCACAATAAAAATAGCAGGACAGATAAAAGAAGCTCTATTAGATACAGGAGCAGATGATACAGTATTAGAAGATATAAATTTGCCAGGAAAATGGAAACCAAAAATGATAGGGGGAATTGGAGGTTTTATCAAGGTAAGACAATATGATCAGATATCTATAGAAATTTGTGGAAAAAAGGCTATAGGTACAGTGTTAGTAGGACCTACACCTGTCAATATAATTGGACGTAATATGTTGACTCAGCTTGGTTGTACTTTAAATTTCCCAATTAGTCCTATTGACACTGTACCAGTAACATTAAAGCCAGGAATGGATGGACCAAAGGTTAAACAGTGGCCATTAACAGAAGAAAAAATAAAAGCATTA…
021410_2017_AE	~~~~~~~~~~~~~~~TGGCAACGACCCCTTGTCACAGTAAAAATAGGAGGACAGATGAGAGAAGCTCTATTAGATACAGGAGCAGATGATACAGTATTAGAAGATATAAATTTGCCAGGAAAATGGAAACCAAAAATGATAGGGGGAATTGGAGGTTTTATCAAGGTAAGACAATATGATCAAATACTTATAGAAATTTGTGGAAAAAAGGCTATAGGTACAGTGTTAGTAGGACCTACACCTATCAACATAATTGGACGAAATATRTTGRCTCAGATKGGTTGTACTTTAAATYTCCCAATTAGTCCTATTGACACTGTACCAGTAAMATTAAAGCCAGGAATGGATGGACCAAAGGTTAAACAGTGGCCATTAACAGAAGAAAAAATAAAAGCATTA…
021407_2017_AE	~~~~~~~~~~~~~~~TGGCAACGACCTCTTGTCACAGTAAAAATAGGRGGACAGATGAAAGAAGCTCTATTAGATACAGGAGCAGATGATACAGTATTAGAAGATATAAATTTGCCAGGAAAATGGAAACCAAAAATGATAGGGGGAATWGGAGGTTTTATCAAGGTAAGGCAATATGATCAGATACTTATAGAAATTTGTGGGAAAAAAGCTATAGGTACAGTGTTAGTAGGACCTACACCTGTCAACATAATTGGACGAAATATGTTGACTCAGATTGGTTGYACTTTAAATTTCCCAATTAGCCCTATTGACACTGTACCAGTAACATTAAAGCCAGGAATGGATGGACCAAAGGTTAAACAATGGCCATTAACAGAAGAAAAAATAAAAGCATTA…
303209_2017_AE	CCTCAAATCACTCTTTGGCAACGACCCCTTGTCACAATAAAAATAGGAGGACAGATAAAAGAAGCTCTATTAGATACAGGAGCAGATGATACAGTATTAGAAGATATAAATTTGCCAGGAAAATGGAAACCAAAAATGATAGGGGGAATTGGAGGTTTTATCAAGGTAAAGCAATATGATCAGATACTTATAGAAATTTGTGGAAAAAAGGCTATAGGTACAGTGTTAGTAGGACCTACACCTATCAACATAATTGGACGAAATATGTTGACTCAGCTTGGTTGTACTTTAAATTTCCCAATTAGCCCTATTGACACTGTACCAGTAACATTAAAGCCAGGAATGGATGGACCAAAAGTTAAACAGTGGCCATTAACAGAAGAAAAAATAAAAGCACTA…
303160_2017_AE	CCTCAAATCACTCTTTGGCAACGACCCCTTGTCACAATAAAAGTAGAAGGACAGATGAAAGAAGCTCTATTAGATACAGGAGCAGATGATACAGTATTAGAAGATATAAATTTGCCAGGAAAATGGAAACCAAAAATGATAGGGGGAATTGGAGGTTTTATCAAGGTAAGGCAATATGATCAGATACTTATAGAAATTTGTGGAAAAAAGGCCATAGGTACAGTGTTAGTAGGACCTACACCTGTCAATATAATTGGACGAAATATGTTGACTCAGCTTGGTTGTACTTTAAATTTCCCAATTAGCCCTATTGACACTGTACCAGTAAAATTAAAGCCAGGAATGGATGGACCAAAGGTTAAACAGTGGCCATTAACAGAAGAAAAAATAAAAGCATTA…
022133_2017_AE	~~~~~~~~~~~~~~~TGGCAACGACCCATTGTTACAGTAAAAATAGAAGGACAGRTGAAAGAAGCTCTATTAGATACAGGAGCAGATGATACAGTRTTAGAAGATATAAATTTGCCAGGAAAATGGAAACCAAAAATGATAGGGGGAATTGGAGGTTTTATCAAAGTAAGGCAATATGATCAGATAACTATAGAAATTTRTGGAAAAAGGGCTATAGGCACAGTGTTAGTAGGACCTACACCTGTCAACATAATTGGACGAAATATGTTGACTCAGATTGGYTGTACTTTAAATTTCCCAATTAGTCCCATTGACACTGTRCCAGTAAAGTTAAAGCCAGGAATGGATGGACCAAAGGTTAAACAGTGGCCATTAACAGAAGARAAAATAAAAGCATTA…
303270_2017_AE	CCTCAAATCACTCTTTGGCAACGACCCCTTGTCACAATAAAAATAGGAGGACAGATAAAAGAAGCTCTATTAGATACAGGAGCAGATGATACAGTATTAGAAGATATAAATTTGCCAGGAAAATGGAAACCAAAAATGATAGGGGGAATTGGAGGCTTTATCAAAGTAAGGCAATATGATCAGATACCTATAGAAATTTGTGGAAAAAAGGCTATAGGTACAGTGTTAGTGGGACCTACACCTATCAACATAATTGGACGAAATATGTTGACTCAGCTTGGTTGTACTTTAAATTTCCCAATTAGCACTATTAGCACTGTACCAGTATCATTAAAGCCAGGAATGGATGGACCAAAGGTTAAACAGTGGCCATTAACAGAAGAAAAAATAAAAGCATTA…
022125_2017_AE	~~~~~~~~~~~~~~~TGGCAACGACCCATTGTCCCAGTAAAAATAGGAGGMCAGATAAAAGAAGCTCTATTAGATACAGGAGCAGATGATACAGTATTAGAAGATATACATTTGCCAGGAAAATGGAAACCAAAAATGATAGGGGGAATTGGAGGTTTTATCAAGGTGAAGCAATATGATCATATACTTATAGAAATTTATGGAAAAARGGCTRYAGGTACAGTATTAGTAGGACCTACACCTGTCAACATAATTGGACGAAATATGTTGACTCAGATTGGTTGTACTTTAAATCTACCAATTAGCCCTATTGACACTGTACCAGTAACATTAAAGCCAGGAATGGATGGACCAAAGGTTAAACAGTGGCCATTAACAGAAGAAAAAATAAAWGCATTA…
022127_2017_AE	~~~~~~~~~~~~~~~TGGCAACGACCCCTCGTCACAGTAAAAATAGGAGGACAGGTGAGAGAAGCTCTATTAGATACAGGAGCAGATGATACAGTATTAGAAGAAATAAATTTGCCAGGAAAATGGAAACCAAAAATGATAGGGGGAATTGGAGGTTTTATCAAGGTAAGGCAGTATGATCAGATACTTATAGAAATTTGTGGAAAAAAGGCCATAGGTACAGTATTAGTAGGACCTACGCCTGTCAACATAATTGGACGAAATATGTTGACTCAGATTGGTTGTACTTTAAATTTCCCAATTAGCCCTATTGACACTGTACCAGTAACATTAAAGCCAGGAATGGATGGACCAAAGGTTAAACAGTGGCCATTAACAGAAGAAAAAATAAGAGCATTA…
022128_2017_AE	CCTCAAATCACTCTTTGGCAACGACCCCTTGTCACAGTAAAAGTAGGAGGACAGATGAGGGAAGCTCTATTAGATACAGGAGCAGATGATACAGTATTAGAAGATATAAATTTGCCAGGAAAATGGAAACCAAAAATGATAGGGGGAATTGGAGGTTTTATCAAGGTAAGGCAATATGATCAGATACTTATAGAAATTTGTGGAAAAAAGGCTGTAGGCTCAGTGTTAGTAGGACCTACACCTGTCAATATAATTGGACGRAATATGTTGACTCAGCTTGGTTGTACTTTAAATTTTCCAATYAGCCCTATTGACACTGTACCAGTAACATTAAAGCCAGGAATGGATGGACCAAAGGTTAAACAGTGGCCATTAACAGAAGAAAAAATAAAAGCATTA…
303321_2017_AE	CCTCAAATCACTCTTTGGCAACGACCCCTTGTCTCAATAAAAGTAGGAGGACAGATAAAAGAAGCTCTATTAGATACAGGAGCAGATGATACAGTATTAGAAGATATAAATTTGCCAGGAAAATGGAAACCAAAAATGATAGGGGGAATTGGAGGTTTTATCAAGGTAAGGCAATATGATCARATATCTATAGAAATTTGTGGRAAAAAGGCCATAGGTACAGTGTTAGTAGGACCTACACCTATCAACATAATTGGACGAAATATGTTGACTCAGCTTGGTTGTACTTTAAATTTCCCAATTAGCCCTATTGAAACTGTACCAGTAAAATTAAAGCCAGGAATGGATGGACCAAAGGTTAAACAGTGGCCATTAACAGAAGAAAAAATAAAAGCATTA…
303229_2017_AE	CCTCAAATCACTCTTTGGCAACGACCCCTTGTCCCAATAAAAATAGGAGGACAGATAAGAGAAGCTCTATTAGATACAGGAGCAGATGATACAGTATTAGAAGATATAAATTTGCCAGGAAAATGGAAACCAAAAATGATAGGGGGAATTGGAGGTTTTATCAAAGTAAGGCAATATGATCAGATAACTATAGAAATTTGTGGAAAAAAGGCTATAGGTACAGTGTTAGTAGGACCTACACCTATCAACATAATTGGACGAAATATGTTGACTCAGCTTGGTTGTACTTTAAATTTCCCAATTAGCCCTATTGACACTGTACCAGTAAAATTAAAGCCAGGAATGGATGGACCAAAGGTTAAACAGTGGCCATTAACAGAAGAGAAAATAAAAGCATTA…
303241_2017_AE	CCTCAAATCACTCTTTGGCAACGACCCCTTGTCTCAATAAAAATAGGAGGACAGATAAAAGAAGCTCTATTAGATACAGGAGCAGATGATACAGTATTAGAAGATATAAATTTGCCAGGAAAATGGAAACCAAGAATGATAGGGGGAATTGGAGGTTTTATCAAGGTAAGGCAATATGATGAGATATCTATAGAAATTTGTGGAAAAAGGGCTATAGGTACAGTGTTAGTAGGACCTACACCTGTCAACATAATTGGACGAAATATGTTGACTCAGATTGGTTGTACTTTAAATTTCCCAATTAGCCCTATTGACACTGTACCAGTAACATTAAAGCCAGGAATGGATGGACCAAAAGTTAAACAGTGGCCMTTAACAGAAGAAAAAATAAAAGCATTA…
022123_2017_AE	~~~~~~~~~~~~~~~TGGCAACGACCTCTTGTCACAGTAAAAGTAGGAGGACAGMTGAAAGAAGCTCTATTAGATACAGGAGCAGATGATACAGTATTAGAAGATATAAATTTGCCAGGAAAATGGAAACCAAAAATGATAGGGGGAATTGGAGGTTTTATCAAGGTAARGCAATATGATGAGATACTCATAGAAATTTGTGGGAAAAAAGCTATAGGTACAGTGTTAGTAGGACCTACACCTGTCAACATAATTGGRCGAAATATGTTGACTCAGATTGGTTGTACTTTAAATTTCCCAATTAGCCCTATTGACACTGTACCAGTAACATTAAAGCCAGGAATGGATGGACCAAAGGTTAAACARTGGCCATTAACAGAAGAAAAAATAARAGCATTA…
022122_2017_AE	cctcaaatcactctttggcaacgaccccttgtcacagtaaargtaggaggasagatgagagaagctctattagatacaggagcagatgacacagtattagaagacataaatttgccaggaaaatggaaaccaaaaatgatagggggaattggaggttttatmaaagtaagrcaatatgatcagatacytatagaaatttgtgggaaaaaggccataggtacagtgttagtaggacctacacctgtcaacataattggacgaaatatgttgactcagcttggttgtactttaaatttcccaattagccctgttgacactgtaccagtaacattaaagccaggaatggatggaccaarggttaaacagtggccattaacagaagaraaaataaaagcatta…
303207_2017_AE	CCTCAAATCACTCTTTGGCAACGACCCCTTGTCACAGTAAAAATAGAAGGACAATTGAGAGAGGCTCTCTTAGATACAGGAGCAGATGATACAGTATTAGAAGATATAAATTTGCCAGGAAAATGGAAACCAAAAATGATAGGGGGAATTGGAGGTTTTATCAAAGTAAGGCAATATGATCAGATATCTATAGAAATTTGTGGAAAAAGGGCTGTAGGTACAGTGTTGGTAGGACCTACACCTGTCAACATAATTGGAAGAAATATGTTGACTCAGCTTGGATGTACTTTAAATTTCCCCATTAGCCCTATTGACACTGTACCAGTAACATTAAAGCCAGGAATGGATGGACCAAAGGTTAAACAGTGGCCATTAACAGAAGAAAAAATAAAAGCATTA…
303185_2017_AE	CCTCAAATCACTCTTTGGCAACGACCCCTTGTTACAGTAAAAATAGGAGGACAGATAAAAGAAGCTCTATTAGATACAGGAGCAGATGATACAGTATTAGAAGATATAAATTTGCCAGGAAAATGGAAACCAAAAATGATAGGGGGAATTGGTGGTTTTATCAAGGTAAAGCAATATGATCAGATACTTATAGAAATTTGTGGAAAAAAGGCTATAGGTACAGTGTTAGTAGGACCTGCACCTGTCAACATAATTGGACGAAATATGTTGACTCAGATTGGTTGTACTTTAAATTTCCCAATTAGTCCTATTGACACTGTACCAGTGACATTAAAGCCAGGAATGGATGGACCAAAGGTTAAACAGTGGCCATTAACAGAAGAAAAAATAAAAGCATTA…
022113_2017_AE	CCTCAAATCACTCTTTGGCAACGACCCCTTGTCACAATAAAAATAGGAGGACAGATRAAAGAAGCTCTATTAGATACAGGAGCAGATGATACAGTAKTAGAAGATATAGAGTTGCCAGGAAAATGGAAACCAAARATGATAGGGGGAATTGGAGGTTTTATCAAGGTAAGGCAATATGATCAGATACCTATAGAAATTTGTGGAAAAAAGGCTATAGGTACAGTGTTAGTAGGACCTACACCTGTCAACATAATTGGACGAAATATGTTGACTCAGCTTGGTTGTACTTTAAATTTCCCCATTAGCCCTATTGACACTGTACCAGTAACATTAAAGCCAGGAATGGATGGACCAAAGGTTAAACAGTGGCCATTAACAGAAGAAAAAATAAAAGCATTA…
022111_2017_AE	~~~~~~~~~~~~~~~TGGCAACGACCCCTTGTCACAATAAAAGTAGGAGGACAGATAAAAGAAGCTCTAYTAGATACAGGAGCAGATGATACAGTATTRGAAGATATAAATTTGCCAGGAAAATGGAAACCAAAAATGATAGGGGGRATTGGAGGTTTTATCAAGGTAAGACAATATGATCAGATACTTATAGAAATTTGTGGGAAAAAAGCTATAGGTTCAGTGTTAGTAGGACCTACACCTGTCAACATAATTGGACGAAATATGTTGACTCAGCTTGGTTGTACTTTAAATTTCCCAATTAGCCCTATTGACACTGTACCAGTAACATTAAAGCCAGGAATGGATGGACCAAARGTTAAACAGTGGCCATTAACAGAAGAAAAAATAAAAGCATTA…
022103_2017_AE	~~~~~~~~~~~~~~~TGGCAACGACCCCTTGTCACAATAAAAATAGGAGGACAAATAAAAGAAGCTCTATTAGATACAGGAGCAGATGATACAGTATTAGAAGATATAAATTTGCCAGGAAAATGGAAACCAAAAATGATAGGGGGGATTGGAGGTTTTATCAAGGTAAGGCAATATGATCAGATAATGATAGAGATCTGTGGAAAAAAGGCTATAGGTACAGTGTTAGTAGGACCTACACCTATCAACATAATTGGACGAAATATGTTGACTCAGCTTGGTTGTACTTTAAATTTCCCAATTAGCCMTATTGACACTGTACCAGTAARATTAAAGCCAGGAATGGATGGACCAAAGGTTAAACAGTGGCCATTAACAGAAGAAAAAATAAAAGCATTA…
303562_2017_AE	CCTCAAATCACTCTTTGGCAACGACCCCTTGTTACCGTAAAAATAGGAGGACAGATGATAGAAGCCCTGTTAGATACAGGAGCAGATGATACAGTATTAGAAGATATAAATTTGCCAGGAAAATGGAAACCAAAAATGATAGGGGGAATTGGAGGTTTTATCAAAGTAAGGCAATATGATCAGATACTTATAGAGATTTGTGGAAAAAGGGCTATAGGTACAGTGTTAGTAGGACCTACACCTATCAACATAATTGGACGAAATATGTTGACTCAGATTGGTTGTACTTTAAATTTCCCAATTAGCCCTATTGACACTGTACCAGTAAAACTAAAGCCAGGAATGGATGGTCCAAAAGTTAAACAATGGCCATTAACAGAAGAAAAAATAAAAGCATTA…
303197_2017_AE	CCTCAAATCACTCTTTGGCAACGACCCCTTGTCACAGTAAAAATAGGAGGACAGATAAAAGAAGCTCTATTAGATACAGGAGCAGATGATACAGTATTAGAAGATATAAATTTGCCAGGAAAATGGAAACCAAAAATGATAGGGGGAATTGGAGGTTTTATCAAAGTAAGGCAATATGATCAGATACTTATAGAAATTTGTGGAAAAAAGGCTATAGGCACAGTGTTAGTAGGACCTACACCTGTCAACATAATTGGACGAAATATGATGACTCAGATTGGTTGTACTTTAAATTTCCCAATTAGCCCTATTGACACTGTACCAGTAAAATTAAAGCCAGGAATGGATGGACCAAAGGTTAAACAATGGCCATTAACAGAAGAAAAAATAAAAGCATTA…
022817_2017_AE	~~~~~~~~~~~~~~~TGGCAACGACCCCTTGTCTCAATAAAGATAGGAGGACAGACAAGAGAAGCTCTATTAGATACAGGAGCAGATGATACAGTATTAGAAGACATAAATTTGCCAGGAAAATGGAAACCAAAAATGATAGGGGGAATTGGAGGTTTTATCAAGGTAAGGCAATATGATCAGATAARTATAGAAATTTGTGGAAAAAAGGCTATAGGTACAGTGCTAGTAGGGCCTACACCTATCAACATAATTGGACGAAATATGTTGACTCAGCTTGGTTGTACTTTAAATTTCCCAATTAGYCCTATTGACACTGTACCAGTAAAATTAAAGCCAGGAATGGATGGACCAAAGGTTAAACAGTGGCCATTAACAGAAGAAAAAATAAAAGCATTA…
303214_2017_AE	CCTCAAATCACTCTTTGGCAACGACCCCTTGTCACAGTAAAAATAGGAGGACAGATGAAAGAAGCTTTATTAGATACAGGAGCAGATGATACAGTATTAGAAGATATAAATTTGCCAGGAAAATGGAAACCAAAAATGATAGGGGGAATTGGAGGTTTTATCAAGGTAAAGCAATATGATCAGATACTTATAGAAATTTGTGGAAAAAGGGCTATAGGTACAGTGTTAGTAGGACCTACACCTGTCAACATAATTGGACGGAATATGTTGACTCAGATTGGTTGTACTTTAAATTTCCCAATAAGTCCTATTGAAACTGTACCAGTAACATTAAAGCCAGGAATGGATGGACCAAAGGTTAAACAGTGGCCATTAACAGAAGAAAAAATAAAAGCATTA…
303196_2017_AE	CCTCAAATCACTCTTTGGCAACGACCCATTGTCACAGTAAAGATAGGAGGACAAATGAAAGAAGCTCTATTAGATACAGGAGCAGATGATACAGTATTAGAAGAGATAAATTTGCCAGGAAAATGGAAACCAAAAATGATAGGGGGAATTGGAGGTTTTATCAAAGTAAGGCAATATGATCAGATCCTTATAGAAATCTGTGGAAAAAAGGCTATAGGTACAGTGTTAGTAGGACCTACACCTGTCAACATAATTGGAAGAAATATGTTGACTCAGATTGGTTGTACTTTAAATTTCCCAATTAGCCCTATTGACACTGTACCAGTAAAATTAAAACCAGGAATGGATGGACCAAAGGTTAAACAGTGGCCATTAACAGAAGAAAAAATAAAAGCATTA…
303198_2017_AE	CCTCAAATCACTCTTTGGCAACGACCCCTTGTCACAATAAAAATAGGAGGACAGATAAAAGAAGCTCTATTAGATACGGGAGCAGATGATACAGTATTAGAAGATATAAATTTGCCAGGAAAATGGAAACCAAAAATGATAGGGGGAATTGGAGGTTTTATCAAGGTAAGGCAATATGATCAGATACTTATAGAAATTTGTGGAAAAAGGGCTATAGGTACAGTGTTAGTAGGACCTACACCTATCAACATAATTGGACGAAATATGTTGACGCAGCTTGGTTGTACTCTAAATTTCCCAATTAGCCMTATTGACACTGTACCAGTAAAATTAAAGCCAGGAATGGATGGACCAAAGGTTAAACAGTGGCCATTAACAGAAGAAAAAATAAAAGCTTTA…
303246_2017_AE	CCTCAAATCACTCTTTGGCAACGACCCCTTGTCACAATAAAAATAGGAGGACAGATGAGAGAAGCTCTATTAGATACAGGAGCAGATGATACAGTATTAGAAGATATAAATTTGCCAGGAAAATGGAAACCAAAAATGATAGGGGGAATTGGAGGTTTTATCAAGGTAAGGCAATATGATGAAATACTTATAGAAATTTGTGGAAAAAAGGCTATAGGTACAGTGTTAGTAGGACCTACACCTATCAACATAATTGGAAGAAATATGTTGACTCAGCTTGGTTGTACTTTAAATTTCCCAATTAGCCCTATTGACACTGTACCAGTAACATTAAAGCCAGGAATGGATGGACCAAAGGTTAAACAGTGGCCATTAACAGAAGAAAAAATAAAAGCATTA…
303199_2017_AE	CCTCAAATCACTCTTTGGCAACGACCCCTTGTCACAATAAAAATAGGAGGACAGATAAAAGAAGCTCTATTAGATACAGGGGCAGATGATACAGTATTAGAAGATATAAATTTGCCAGGAAAATGGAAACCAAAAATGATAGGGGGAATTGGAGGTTTTATCAAAGTAAGACAATATGATCAGATAACTATAGAAATTTGTGGAAAAAAGGCTGTAGGTACAGTGTTAGTAGGACCTACACCTATCAACATAATTGGACGAAATATGTTGACTCAGCTTGGTTGTACTTTAAATTTCCCAATTAGTCCTATTGACACTGTACCAGTAACATTAAAGCCAGGAATGGATGGACCAAAAGTTAAACAGTGGCCATTAACAGAAGAAAAAATAAAAGCATTA…
303215_2017_AE	CCTCAAATCACTCTTTGGCAACGACCCCTTGTCACAATAAAAGTAGGAGGACAGATAAAAGAAGCTCTATTAGATACAGGAGCAGATGATACAGTATTAGAAGATATAAATTTRCCAGGAAAATGGAAACCAAAAATGATAGGGGGAATTGGGGGTTTTATCAAGGTAAAGCAATATGATCAGATACTTATAGAAATTTGTGGAAAAAAGGCTATAGGTACAGTGTTAGTAGGACCTACACCTGTCAACATAATTGGACGAAATATGTTGACTCAGATTGGATGTACTTTAAATTTCCCAATTAGCCCTATTGACACTGTACCAGTAACATTAAAGCCAGGAATGGATGGGCCAAAGGTTAAACARTGGCCATTAACAGAAGAAAAGATAAAAGCATTA…
030709_2017_AE	~~~~~~~~~~~~~~~TGGCAACGACCYGTTGTCACAGTAAAAATAGRAGGACAGATAAAAGAAGCTCTATTAGATACAGGAGCAGATGATACAGTATTAGAAGATATAAATTTGCCAGGAAAATGGAAACCAAAAATGATAGGGGGAATTGGAGGTTTTATCAAGGTAARgCAATATGAtcAGATAaATATAGAAATTTgTGGAAAAAGRGCTATAGGTACAGTGTTAGTAGGACCTACACCTATCAACATAATTGGACGAAATATGTTGACTCAGATTGGTTGCACTCTAAATTTCCCAATTAGTCCTATTGACACTGTACCWGTAACATTAAAGCCAGGAATGGATGGACCAAAAGTTAAACAGTGGCCATTAACAGAAGARAAAATAAAAGCATTA…
303222_2017_AE	~~~~~~~~~~~~~~~TGGCAACGACCCCTTGTCACAGTAAGAATAGAAGGACAGATGAAAAAGGCTCTATTAGATACAGGAGCAGATGATACAGTATTAGAAGATATAAATTTACCAGGAAAATGGAAACCAAAAATGATAGGGGGAATTGGAGGTTTTATCAAGGTAAGGCAATATGATCAGATACTTATAGAAATTTGTGGAAAAAAAGCTATAGGTACAGTGTTAGTAGGACCTACACCTATCAACATAATTGGACGAAATATGTTGGCTCAGATTGGTTGTACTTTGAATCTTCCAATCAGYCCTATTGACACTGTACCCGTAACATTAAAGCCAGGAATGGATGGGCCAAAGGTTAAACAGTGGCCATTAACAGAAGAAAAAATAAAAGCATTA…
030711_2017_AE	cctcaaatcactctttggcaacgacctcttgtcacagtaaaaataggaggacagatgaaagaagctctattagatacaggagcagatgatacagtattagaagatataaatttgccaggaaaatggaaaccaaaaatgataggaggaattggaggctttatcaaggtaaggcaatatgaccagatatctatagaaatttgtgggaaaaaagctataggtacagtgttagtaggacctacacctgtcaacataattggacgaaatatgttgactcagattggttgtactttaaatttcccaattagccctattgacactgtaccagtaacattaaaaccaggaatggatggaccaaaggttaaacaatggccattaacagaagaaaaaataaaagcatta…
303194_2017_AE	CCTCAAATCACTCTTTGGCAACGACCTCTTGTCCCAGTAAAAATAGGAGGACAGATAAAGGAAGCCCTATTAGATACAGGAGCAGATGATACAGTATTAGAAGATATAAATTTGCCAGGAAAATGGAAGCCAAAAATGATAGGGGGAATTGGAGGTTTTATCAAGGTAAAGCAATATGATCAAATACTTATAGAAATTTGTGGAAAAAGGGCTATAGGTACAGTGTTAGTAGGACCTACACCTGTCAACATAATTGGACGAAATATGTTGACTCAGATTGGTTGTACCTTAAATTTCCCAATTAGCTCTATTGACACTGTACCAGTAACATTAAAGCCAGGAATGGATGGACCAAAGGTTAAACAGTGGCCATTAACAGAAGAAAAAATAAAAGCATTA…
303217_2017_AE	CCTCAAATCACTCTTTGGCAACGACCTCTTGTCACAGTAAAAATAGGAGGACAGATGAAAGAAGCTCTATTAGATACAGGAGCAGATGATACAGTATTAGAAGATATAAATTTGCCAGGAAAATGGAAACCAAAAATGATAGGGGGAATTGGAGGTTTTATCAARGTAAGACAATATGATCAGATASTTATAGAAATTTGTGGAAAAAAGGCTATAGGTACAGTGTTAGTAGGACCTACACCTGTCAACATAATTGGACGAAATATGTTGACTCAGATTGGTTGTACTTTAAATTTCCCAATTAGTCCTATTAACACTGTACCAGTAAAATTAAAGCCAGGAATGGATGGACCAAAAGTTAAACAGTGGCCATTAACAGAAGAAAAAATAAAAGCATTA…
303218_2017_AE	CCTCAAATCACTCTTTGGCAACGACCTCTTGTCACAGTAAAAATAGGAGGACAGATGAAAGAAGCTCTATTAGATACAGGAGCAGATGATACAGTACTAGAAGATATAAATTTGCCAGGAAAATGGAAACCAAAAATGATAGGGGGAATTGGAGGTTTTATCAAGGTAAAACAATATGATCAGATACTTATAGAAATTTGTGGAAAAAAGGCCATAGGTACAGTATTAGTAGGACCTACACCTATCAATATAATTGGGCGAAATATGTTAACTCAGATTGGTTGTACTCTAAATTTCCCAATTAGTCCTATTAACACTGTACCAGTAACATTAAAGCCAGGAATGGATGGACCAAAGGTTAAACAGTGGCCATTAACAGAAGAGAAAATAAAAGCATTA…
303267_2017_AE	CCTCAAATCACTCTTTGGCAACGACCCCTTGTCACAGTAAAAATAGGAGGACAGATGAGAGAAGCTCTATTAGATACAGGGGCAGATGATACAGTATTAGAAGACATAAATTTGCCAGGAAAATGGAAACCAAAAATGATAGGGGGAATTGGAGGTTTTATCAAAGTAAGGCAATATGATCAGATAGTTATAGAAATTTGTGGGAAAAAAGCTATAGGTACAGTGTTAGTGGGACCGACACCTATCAACATAATTGGACGAAATATGTTGACTCAGCTTGGTTGTACTTTAAATTTCCCAATTAGCCCTATTGACACTGTACCAGTAACATTAAAGCCAGGAATGGATGGACCAAAGGTTAAACAGTGGCCATTAACAGAAGAAAAAATAAAAGCATTA…
303230_2017_AE	CCTCAAATCACTCTTTGGCAACGACCCCTTGTCACAATAAAAATAGGAGGACAGACGAGAGAAGCTCTATTAGATACAGGAGCAGATGATACAGTATTAGAAGATATAAATTTGCCAGGAAAATGGAAACCAAAAATGATAGGGGGAATTGGAGGTTTTATCAAGGTAAAGCAATATGATCAGATACCTATAGAAATTTATGGAAAAAAGGCTATAGGTACAGTGTTAGTAGGACCTACACCTATCAACATAATTGGACGAAATATGTTGACTCAGCTTGGTTGTACTCTAAATTTCCCAATTAGYCCTATTGACACTGTACCAGTAAAATTAAAGCCAGGAATGGATGGACCAAAGGTTAAACAATGGCCATTAACAGAAGAAAAAATAAAGGCATTA…
031409_2017_AE	~~~~~~~~~~~~~~~TGGCAACGACCCCTTGTCACAATAAAAATAGGAGGACAGATGAAAGAAGCTCTATTAGATACAGGAGCAGATGATACAGTATTAGAAGATATAAATTTGCCAGGAAAATGGAAACCAAAAATGATAGGGGGAATTGGAGGTTTTATCAAGGTAAGGCAATATGATCAGATACTTATAGAAATTTGTGGGAAAAAAGCTATAGGTACAGTGTTAGTAGGACCTACACCTGTCAACATAATTGGACGAAATATGTTGACTCAGCTTGGTTGTACTTTAAATTTCCCAATTAGTCCTATTGACACTGTACCAGTAACATTAAAGCCAGGAATGGATGGACCAAAGGTTAAACAGTGGCCATTAACAGAAGAAAAAATAAAAGCATTA…
031408_2017_AE	cctcaaatcactctttggcaacgaccccttgtcacagtaaaaataggaggacagataaaagaagctctattagatacaggagcagatgatacagtattagaagagataaatttgccaggaaaatggaaaccaaaaatgatagggggaattggaggttttatcaaggtaaggcaatatgatcagatacttatagaaatttgtggaaaaaaggctataggtacagtgctagtaggacctacacctgtcaacataattggacgaaatatgctgactcagcttgggtgtactttaaatttcccaattagccctattgacactgtaccagtaacattaaagccaggaatggatggaccaaaggttaaacaatggccattaacagaagaaaaaataaaagcatta…
031407_2017_AE	~~~~~~~~~~~~~~~TGGCAACGACCCCTTGTCACAGTAAAAATAGGAGGACAGATAAAAGAAGCTCTATTAGATACAGGAGCAGATGATACAGTATTAGAAGAGATAAATTTGCCAGGAAAATGGAAACCAAAAATGATAGGGGGAATTGGAGGTTTTATCAAGGTAAGGCAATATGATCAGATACTTATAGAAATTTGTGGAAAAAAGGCTATAGGTACAGTGCTAGTAGGACCTACACCTGTCAATATAATTGGACGAAATATGCTGACTCAGCTTGGGTGTACTTTAAATTTCCCAATTAGCCCTATTGACACTGTACCAGTAACATTAAAGCCAGGAATGGATGGACCAAAGGTTAAACAATGGCCATTAACAGAAGAAAAAATAAAAGCATTA…
303235_2017_AE	CCTCAAATCACTCTTTGGCAACGACCCCTTGTCACAATAAAAATAGGAGGACAGATAAARGAAGCTCTATTAGATACGGGAGCGGATGATACAGTATTAGAAGATATRAATTTGCCAGGAAAATGGAAACCAAAAATGATAGGGGGAATTGGAGGTTTTATCAAGGTAARRCAATATGATCAGATACTTATAGAAATTTGTGGAAAAAGGGCTATAGGTACAGTGTTAGTAGGACCTACACCTRTCAACATAATTGGACGAAATATGTTGACKCAGMTTGGTTGTACTYTAAATTTYCCAATTAGYCCTATTGACACTGTACCAGTAAAATTAAAGCCAGGAATGGATGGACCAAAGGTTAAACARTGGCCATTAACAGAAGAAAAAATAAAAGCATTA…
303233_2017_AE	CCTCAAATCACTCTTTGGCAACGACCCCTTGTCACAGTAAAAATAGAAGGACAGTTGAAAGAAGCTCTATTAGATACAGGAGCAGATGATACAGTATTAGAAGATATAAATTTGCCAGGAAAATGGAAACCAAAAATGATAGGGGGAATCGGAGGTTTTATCAAAGTAAGGCAATATGATCAGATACTTATAGAAATTTGTGGAAAAAAGGCTATAGGTACAGTGTTAGTAGGACCTACACCTGTCAACATAATTGGACGAAATATGTTGACTCAGATTGGTTGTACCTTAAATTTCCYAATTAGCCCTATTGACACAGTACCAGTAAAATTAAAGCCAGGAATGGATGGGCCAAAGGTTAAACAGTGGCCATTAACAGAAGAAAAGATAAAAGCATTA…
031424_2017_AE	~~~~~~~~~~~~~~~TGGCAACGACCCCTTGTCACAGTAAAAATAGGAGGACAGGTGAAAGAAGCTCTATTAGATACAGGAGCAGATGATACAGTACTAGAAGAAATAAATTTGCCAGGAAAATGGAAACCAAAAATGATAGGGGGAATTGGAGGTTTTATCAARGTAAGGCAATATGATCAGRTACTTWTAGAAATTTGTGGRAAAAARGCTATAGGTACAGTGTTAGTAGGACCTACACCTATCAACATAATTGGWCGAAATATGTTGACTCAGATTGGTTGTACTTTAAATTTCCCAATTAGYCCTATTGACACTGTACCAGTAACATTAAAACCAGGAATGGATGGACCAAAGGTTAAACAGTGGCCATTAACAGAAGAAAAAATAAAAGCATTA…
303231_2017_AE	CCTCAAATCACTCTTTGGCAACGACCTCTTGTCACAGTAAAAATAGGAGGACAGATGAAAGAAGCTCTATTAGATACAGGAGCAGATGATACAGTATTAGAAGATATAAATTTGCCAGGAAAATGGAAACCAAAAATGATAGGGGGAATTGGAGGTTTTATCAAGGTAAAACAATATGATCAGATACTTATAGAAATTTGTGGAAAAAAAGCTATAGGTACAGTGTTAGTAGGACCTACACCTGTCAACATAATTGGGCGAAATATGTTGACTCAGATTGGTTGTACTTTAAATTTTCCAATTAGTCCTATTGACACAGTACCAGTAACATTAAAGCCAGGAATGGATGGACCAAAGGTTAAACAGTGGCCATTRACAGAAGAAAAAATAAAAGCATTA…
031413_2017_AE	~~~~~~~~~~~~~~~TGGCAACGACCCCTYGTCCCAATAAAAATAGGAGGACARATGAAAGAAGCTCTATTGGATACAGGAGCAGATGATACAGTATTAGAAGATATAAATTTGCCAGGGAAATGGAAACCAAAAATGATAGGGGGAATTGGAGGTTTTATCAAGGTAAGGCAATATGATCAGATATCAATAGAAATTTGTGGAAAAAAGGCTATAGGTTCAGTGTTAGTAGGACCTACACCTGTCAACATAATTGGACGAAATATGTTGACTCARCTTGGTTGTACATTAAATTTCCCAATTAGTCCTATTGACACTGTACCAGTAACATTAAAGCCAGGAATGGATGGACCAAAGGTTAAACAGTGGCCATTAACAGAAGAAAAAATAAAAGCATTA…
031403_2017_AE	~~~~~~~~~~~~~~~TGGCAACGACCCCTTGTCACAGTRAAAATAGAAGGACAAATGAGAGAAGCTCTATTAGATACAGGAGCWGATGATACAGTATTAGAAGATATAAATTTGCCAGGRAAATGGAAACCAAAAATGATAGGGGGAATTGGAGGTTTTATCAAGGTAAGGCAATATGATCAGATAGTTATAGAAATTTGTGGAAAAAAGGCTATAGGTACAGTGTTAGTAGGACCTACACCTGTCAACATAATTGGACGAAATATGTTGACTCAGCTTGGTTGTACTTTAAATTTCCCAATTAGCCCTATTGACACTGTACCAGTAACATTAAAGCCAGGRATGGATGGACCAAAGGTTAAACAGTGGCCATTAACAGAAGAAAAAATAAAAGCATTA…
322807_2017_AE	cctcaaatcactctttggcaacgaccccttgtcacagtaaaaataggaggacagatgaaagaagctctattagatacaggagcagatgatacagtatttgaagatataaatttgccaggaaaatggaaaccaaaaatgatagggggaattggaggttttatcaaggtaaggcaatatgatcagataattatagagatttgtggggaaaaagctataggtacagtgttagtaggaccgacccctatcaacataattggacgaaatatgttggctcaaattggttgtactttaaatctcccaattagccctattgacactgtaccagtaaaattaaagccaggaatggatggaccaaaggttaaacagtggccattaacagaagaaaaaataraagcatta…
303260_2017_AE	CCTCAAATCACTCTTTGGCAACGACCCCTTGTCTCAATAAAAATAGGAGGACAGATAAAAGAAGCTCTATTAGATACAGGAGCAGATGATACAGTATTAGAAGATATAAATTTGCCAGGAAAATGGAAACCAAAAATGATAGGGGGAATTGGAGGTTTTATCAAGGTAAGGCAATATGATCAGATATCTATAGAAATTTGTGGAAAAAAGGCCATCGGTACAGTGTTAGTAGGACCTACACCTGTCAACATAATTGGACGAAATATGTTGACTCAGCTTGGTTGTACTTTAAATTTCCCAATTAGCCCTATTGACACTGTACCAGTAAAATTAAAGCCAGGAATGGATGGACCAAAGGTTAAACAGTGGCCATTATCAGCAGAAAAAATAAAAGCATTA…
032109_2017_AE	~~~~~~~~~~~~~~~TGGCAACGACCCCTTGTCACAATAAAAGTAGGAGGACAGATAAAAGAAGCTCTATTAGATACAGGAGCAGATGATACAGTATTAGAAGATATAAATTTGCCAGGAAAATGGAAACCAAAAATGATAGGGGGAATTGGAGGTTTTATCAAGGTAAAGCAATATGATCAGATACCTATAGAAATTTGTGGAAAAAAGGCTATAGGTACAGTGTTAGTAGGACCTACACCTGTCAACATAATTGGACGAAATATGTTGACTCAGCTTGGTTGTACTTTAAATTTCCCAATTAGCCCTATTGACACTGTACCAGTAACATTAAAGCCAGGRATGGATGGACCAAAGGTTAAACARTGGCCATTAACAGAAGAAAAAATAAAAGCRTTA…
303254_2017_AE	CCTCAAATCACTCTTTGGCAACGACCCCTTGTCCCAATAAAAATAGGAGGACAGATAAGAGAAGCTCTATTAGATACAGGAGCAGATGATACAGTATTAGAAGATATAGATTTGCCAGGAAAATGGAAACCAAAAATGATAGGGGGAATTGGAGGTTTTATCAAAGTAAGGCAATATGATCAGATACCTATAGAAATTTGTGGAAAAAAGGCTATAGGTACAGTGTTAGTAGGACCTACACCTATCAACATAATTGGACGAAATATGTTGACTCAGCTTGGTTGTACTTTAAATTTCCCAATTAGCCCTATTGACACTGTACCAGTAACATTAAAGCCAGGAATGGATGGACCAAAGGTTAAACAGTGGCCATTAACAGAGGAAAAAATAAAAGCATTA…
303252_2017_AE	CCTCAAATCACTCTTTGGCAACGACCCCTTGTTACAGTAAAAGTAGGAGGAGAGATGAGAGAAGCTCTATTAGATACAGGAGCAGATGATACAGTATTAGAAGATATAAATTTGCCAGGAAAATGGAAACCAAAAATGATAGGGGGAATTGGAGGTTTTATCAAGGTAAGGCAATATGATCAGATAACTATAGAAATTTGTGGAAAAAAGGCTATAGGTACAGTGTTAGTAGGACCTACACCTATCAACATAATTGGACGAAATATGTTGACTCAGCTTGGTTGTACTTTAAATTTCCCAATTAGCCCTATTGACACTGTACCAGTAACATTAAAACCAGGAATGGATGGACCAAAGGTTAAACAGTGGCCATTAACAGCAGAAAAAATAAAAGCATTA…
032106_2017_AE	~~~~~~~~~~~~~~~TGGCAGCGACCCCTTGTCACAATAAAAATAGAAGGACAGCTAAGAGAAGCTCTATTAGATACAGGAGCAGATGATACAGTATTAGAAGATATAAATTTGCCAGGAAAATGGAAACCAAAAATGATAGGGGGAATTGGAGGTTTTATCAARGTAAGRCAATATGATCAGATACTTATAGAAATTTGTGGAAAAAAGGCTATAGGTACAGTATTAGTAGGACCTACACCTGTCAACATAATTGGACGAAACATGTTGACTCAGCTTGGTTGTACTTTAAATTTCCCAATTAGTCCTATTGAYACTATACCAGTAACATTAAAGCCAGGAATGGATGGACCAAAGGTTAAACAGTGGCCATTGACAGAAGARAAAATAAAAGCATTA…
303258_2017_AE	CCTCAAATCACTCTTTGGCAACGACCCCTTGTCACARTAAAAGTAGGAGGACAGATAAAAGAAGCTCTATTAGATACAGGAGCAGATGATACAGTATTAGAAGATATAGATTTGCCAGGAAAATGGAAACCAAAAATGATAGGGGGAATTGGAGGTTTTATCAAAGTAAGRCAATATGATCAGATACTTATAGAAATTTGTGGAAAAAAGGCTATAGGTACAGTGTTAGTAGGACCTACACCTGTTAACATAATTGGACGAAATATGTTGACTCAGATTGGTTGCACTTTAAATTTCCCAATTAGCCCTATTGACACTGTACCAGTAAAATTAAAGCCAGGAATGGATGGACCAAAGGTTAAACAGTGGCCATTAACAGAAGAAAAGATAAAAGCATTA…
303249_2017_AE	CCTCAAATCACTCTTTGGCAACGACCTCTTGTCTCAATAAAAATAGGGGGACAAATAAGAGAAGCTCTATTAGATACAGGAGCAGATGATACAGTATTAGAAGATATAAATTTGCCAGGAAAATGGAAACCAAAAATGATAGGGGGAATTGGAGGTTTTATCAAAGTAAGGCAATATGATCAGATACCTATAGAAATTTGTGGAAAAAAGGCTATAGGTACAGTGTTAGTAGGACCTACACCTATCAACATAATTGGACGAAATATGTTGACTCAGCTTGGTTGTACTCTAAATTTCCCAATTAGCCCTATTGACACTGTACCAGTAAAATTAAAACCAGGAATGGATGGACCGAAGGTTAAACAGTGGCCATTAACAGAAGAAAAAATAAAAGCATTA…
303271_2017_AE	CCTCAAATCACTCTTTGGCAACGACCCCTTGTCACAGTAAAAGTAGAAGGACAGATGAGAGAAGCTCTATTAGATACAGGAGCAGATGATACAGTATTAAAAGATATAAATTTGCCAGGAAAATGGAAACCAAAAATAATAGGGGGAATTGGAGGTTTTATCAAGGTAAAGCAATATGATCAGATATCTATAGAAATTTGTGGAAAAAAGGCTATAGGTACAGTGTTAGTAGGACCTACACCTGTCAATATAATTGGACGAAATATATTGACTCAGCTTGGTTGTACTTTAAATTTCCCAATTAGCCCTATTGACACTATACCAGTAACATTAAAGCCAGGAATGGATGGACCAAAGGTTAAACAGTGGCCATTAACAGAAGAAAAAATAAAAGCATTA…
032806_2017_AE	~~~~~~~~~~~~~~~TGGCAACGACCCCTTGTCACAGTAAAAATAGGAGGACAGATGAAAGAAGCTCTATTAGATACAGGAGCAGATGATACAGTATTAGARGATATAAATTTGCCAGGAAGATGGAAACCAAAAATGATAGGGGGAATTGGAGGTTTTATCAAGGTAAGGCAATATGATCAGATACCTATAGAAATTTGTGGAAAAARGGCTRTAGGTACAGTGTTAGTAGGACCTACACCTGTCAACATAATTGGRCGAAATATGTTGACTCAGATTGGTTGTACTTTAAATTTCCCAATTAGCCCTATTGACACTGTACCAGTAACATTAAAGCCAGGAATGGATGGACCAAAGGTTAAACAGTGGCCATTAACAGAAGAAAAAATAAAAGCATTA…
303274_2017_AE	CCTCAAATCACTCTTTGGCAACGACCCCTTGTCGCAATAAAAGTAGCAGGACAGATAAAAGAAGCTCTATTAGATACAGGAGCAGATGATACAGTATTAGAAGATATAAATTTGCCAGGAAAATGGAAACCAAAAATGATAGGGGGAATTGGAGGTTTYATCAAGGTAAAGCAATATGATCAGATACTTATAGAAATTTGTGGAAAAAAGGCTATAGGTACAGTGTTAGTAGGACCTACACCTATCAACATAATTGGACGAAATATGTTGACTCAGCTTGGTTGTACTTTAAATTTCCCAATTAGCCCTATTGACACTGTACCAGTAACATTAAAGCCAGGAATGGATGGACCAAAGGTTAAACAGTGGCCATTAACAGAAGAAAAAATAAAAGCATTA…
303277_2017_AE	CCTCAAATCACTCTTTGGCAACGACCCCTTGTCACAGTAAAAGTAGGAGGACAGATGAAAGAAGCTCTATTAGATACAGGAGCAGATGATACAGTATTAGAAGATATAAATTTGCCAGGAAAATGGAAACCAAAAATGATAGGGGGGATTGGAGGTTTTATCAAGGTAAGGCAATATGATCAGATACCTATAGAAATTTGTGGAAAAAAGGCTATAGGTACAGTGTTAGTAGGACCTACACCTGTCAACATAATTGGACGAAATATGTTGACTCAGCTTGGCTGTACTTTAAATTTCCCAATTAGCCCTATTGACACTGTGCCAGTAAAATTAAAGCCAGGAATGGATGGACCAAAGGTTAAACAGTGGCCATTAACAGAAGAAAAAATAAAAGCATTA…
032803_2017_AE	~~~~~~~~~~~~~~~TGGCAACGACCTATTGTCACAGTAAAAATAGAAGGACAGATAAAAGAAGCTCTATTAGACACAGGAGCAGATGATACAGTATTAGAAGATATAAATTTGCCAGGAAAATGGAARCCAAAAATGATAGGGGGAATTGGAGGTTTTATCAARGTAAAACAATATGATCAGATACTTATAGAAATTTGTGGAAAAARGGCTAKAGGTACAGTGTTAGTAGGACCTACACCTGTCAACATAATTGGRCGAAATATGTTGACTCAGATTGGTTGTACYTTAAATTTTCCAATCAGTCCTATTGAAACTGTACCAGTAAAATTAAAGCCAGGAATGGATGGMCCAAAGGTTARACAATGGCCATTRACAAAAGAGAAAATAGAAGCATTA…
130015_2017_AE	~~~~~~~~~~~~~~~TGGCAACGACCCCTTGTCACAGTAAAARTAGGAGGACAGATGAAAGAAGCTCTATTAGATACAGGAGCAGATGATACAGTATTAGAAGATATAAATTTGCCAGGAAAATGGAAGCCAAAAATGATAGGGGGAATTGGAGGTTTTATCAAGGTAAGGCAATATGATCAGATACCTATAGAAATTTGTGGAAAAAGRGCTATAGGTACAGTRTTAATAGGACCTACACCTATCAACATAATTGGAMGAAATATGTTGACTCAGATTGGTTGTACTTTAAATTTCCCMATTAGCCCTATTGACACTGTACCAGTAACATTAAAGCCAGGAATGGATGGGCCAAAGGTTAAACAGTGGCCATTAACAGAAGAAAAAATAAAAGCATTA…
041110_2017_AE	~~~~~~~~~~~~~~~TGGCAACGACCCCTTGTCACAGTAAAAATAGGAGGACAAATAAGAGAAGCTYTATTAGATACAGGAGCAGATGATACAGTATTAGAAGAAATAAATTTGCCAGGAAAATGGAAACCAAAAATGATAGGGGGAATTGGAGGTTTTATCAAGGTAAGGCAATATGATCAGATACTTATAGAAATTTGTGGGAAAAAGGCTATAGGTACAGTGTTAGTAGGACCTACACCTRTCAACATAATTGGACGAAATATGTTGACTCAGCTTGGTTGTACTTTAAATTTCCCAATTAGCCCTATTGACACTGTACCAGTAAAATTAAAGCCAGGAATGGATGGACCAAAGGTTAAACAGTGGCCATTAACAGAAGAAAAAATAAAAGCATTA…
041113_2017_AE	~~~~~~~~~~~~~~~TGGCAACGACCCCTTGTCWCAGTAAAAATAGGAGGACAAATAATAGAAGCTYTATTAGATACAGGAGCMGATGATACAGTATTAGAAAATATAAATTTGCCAGGAAAATGGAAACCAAAAATGATAGGGGGAATTGGAGGTTTTATCAAAGTAAGGCAATATGATCAGATACTTATAGAAATTTGTGGRAAAAAGGCTATAGGTACAGTGTTAGTAGGACCTACACCTGTCAACATAATTGGACGAAATATGATGACTCAGATTGGTTGTACTYTAAATTTCCCAATTAGYCCTATTGACACTGTACCAGTAACATTAAARCCAGGAATGGATGGACCAAAGGTTAAGCAGTGGCCATTAACAGAAGAAAAAATAAAAGCATTA…
303290_2017_AE	~~~~~~~~~~~~~~~TGGCAACGACCCCTTGTCACAGTAAAAATAGGAGGACAGATAAAAGAAGCTCTATTAGATACAGGAGCAGATGATACAGTRTTAGAAGADATAAATTTGCCAGGAAAATGGAAACCAAAAATGATAGGGGGAATTGGAGGTTTTATCAAAGTAAGGCAATATGATCAGATACTTATAGAAATTTGTGGAAAAAAGGCTATAGGTACAGTGTTAGTAGGACCTACACCTGTCAACATAATTGGACGAAATATGTTGACTCAGATTGGTTGTACTTTAAATTTTCCAATTAGTCCTATTGACMCTGTGCCAGTAAMATTAAAACCAGGAATGGATGGACCAAAGGTTAAACAGTGGCCATTAACGAAAGAAAAAATAGAAGCATTA…
041132_2017_AE	~~~~~~~~~~~~~~~TGGCAACGACCCCTTGTCTCAATAAAAATAGGAGGAGAGATAAGAGAAGCTCTATTAGATACAGGAGCAGATGATACAGTATTAGAAGATATAAATTTGCCAGGAAAATGGAAACCAAAAATGATAGGGGGAATTGGAGGCTTTATCAAGGTAAGGCAATATGATCAGATAACTATAGACATTTGTGGGAAAAAGGCCATAGGTACAGTGTTAGTAGGACCTACACCTATCAACATAATTGGACGAAATATGTTGACTCAGCTTGGTTGTACTTTAAATTTCCCAATTAGCCCTATTGACACTGTACCAGTAAAATTAAAGCCAGGWATGGATGGACCAAAGGTTAAACARTGGCCATTAACAGAAGARAAAATAAWAGCATTA…
041122_2017_AE	~~~~~~~~~~~~~~~TGGCAACGACCCCTTGTCACAATAAAAATAGCAGGACAGATGAGAGARGCTCTATTAGATACAGGAGCAGATGATACAGTATTAGAAGATATAAATTTGCCAGGAAAATGGAAACCAAAAATGATAGGGGGAATTGGAGGTTTTATCAAGGTAAAGCAATATGATCAGATACTTATAGAAATTTGTGGAAAAAAGGCTATAGGTACAGTGTTAGTAGGACCTACACCTGTCAACATAATTGGACGAAATATGTTGACTCAGCTTGGTTGCACTTTAAATTTCCCAATTAGTCCTATTGACACTGTACCAGTAACATTAAAGCCAGGAATGGATGGACCAAAGGTTAAACAGTGGCCATTAACAGAAGAAAAAATAAAAGCATTA…
041123_2017_AE	~~~~~~~~~~~~~~~TGGCAACGACCCCTTGTCACAATAAAAATAGCAGGACAGMTGAGAGAAGCTCTATTAGATACAGGAGCAGATGATACAGTATTAGAAGAYATAAATTTGCCAGGAAAATGGAAACCAAAAATGATAGGGGGAATTGGAGGTTTTATCAAGGTAAAGCAATATGATCAGATASTTATAGAAATTTGTGGAAAAAAGGCTATAGGTACAGTGTTAGTAGGACCTACACCTGTCAACATAATTGGACGAAATATGTTGACTCAGCTTGGTTGCACTTTAAATTTCCCAATTAGTCCTATTGACACTGTACCAGTAACATTAAAGCCAGGAATGGATGGACCAAAGGTTAAACAGTGGCCATTAACAGAAGAAAAAATAAAASCATTA…
303285_2017_AE	CCTCAAATCACTCTTTGGCAACGACCCCTTGTCACAATAAAAATAGGAGGACAGATAAAAGAAGCTCTATTAGATACGGGAGCAGATGATACAGTATTAGAAGATATAAATTTGCCAGGAAAATGGAAACCAAAAATGATAGGGGGAATTGGAGGTTTTATCAAGGTAAGGCAATATGATCAGATACTTATAGAAATTTGTGGAAAAAGGGCTATAGGTACAGTGTTAGTAGGACCTACACCTATCAACATAATTGGACGAAATATGTTGACACAGCTTGGTTGTACTCTAAATTTCCCAATTAGCCCTATTGACACTGTACCAGTAAAATTAAAGCCAGGAATGGATGGACCAAAGGTTAAACAGTGGCCATTAACAGAAGAAAAAATAAAAGCATTA…
041815_2017_AE	~~~~~~~~~~~~~~~TGGCAACGACCCCTTGTCACAATAAAAATAGGAGGACAGATGAGAGAAGCTCTATTAGATACAGGAGCAGATGATACAGTATTAGAAGATATAAATTTGCCAGGAAAATGGAAACCAAAAATGATAGGGGGAATTGGAGGTTTTATCAAAGTAAGGCAATATGATGAGATAGCTATAGAAATTTGTGGAAAAAAGGCTATAGGTACAGTATTAGTAGGACCTACACCTATCAACATAATTGGACGAAATATGTTGACTCAGCTTGGTTGTACTTTAAATTTYCCAATTAGCCCTATTGACACTGTACCAGTAACATTAAAACCAGGAATGGATGGACCAAAAGTTAAACAGTGGCCATTAACAGAAGAAAAAATAAAGGCACTA…
041814_2017_AE	~~~~~~~~~~~~~~~TGGCAACGACCCCTWGTCACAGTAAAAATAGGAGGACAGATGAAAGAAGCTCTATTAGATACAGGAGCAGATGATACAGTATTTGAAGATATAAATTTGCCAGGAAAATGGAAACCAAAAATGATAGGGGGAATTGGAGGTTTTATCAAGGTAAGGCAATATGATCAGATAMTTATAGAAATTTGTGGAAAAAAGGCTATAGGTACAGTGTTAGTAGGACCTACACCTGTCAACATAATTGGACGAAATATGTTGACTCAGCTTGGTTGTACTTTAAATTTCCCAATTAGCCCTATTGCCACTGTACCAGTAAAATTAAAGCCAGGAATGGATGGACCAAAGGTTAAACAGTGGCCATTAACAGAAGAAAAAATAAAAGCATTA…
041804_2017_AE	CCTCAAATCACTCTTTGGCAGCGACCCCTTGTCACAGTAAAAATAGAAGGACAGATAAGAGAAGCTCTATTAGATACAGGAGCAGATGATACAGTATTAGAAGATATAAATTTGCCAGGAAAATGGAAACCAAAAATGATAGGGGGAATTGGAGGTTTTATCAAGGTAAAGCAATATGATCAGATACTYATAGAAATTTGTGGAAAAAGGGCTATAGGTACARTGTTAGTAGGGCCTACACCTATCAAYATAATTGGACGAAATATGTTGACTCAGCTTGGATGTACTTTRAATTTCCCAATTAGCCCTATCGACACTGTACCAGTAAAATTAAAGCCAGGAATGGATGGACCAAAGGTTAAACAATGGCCATTAACAGAAGAAAAGATAAAAGCATTA…
303293_2017_AE	~~~~~~~~~~~~~~~TGGCAACGACCCCTTGTCACAATAAAAATAGGAGGACAAATAAAAGAAGCTCTATTAGATACAGGAGCAGATGATACAGTATTAGAAGAAATAAATTTGCCAGGAAAATGGAAACCAAAAATGATAGGGGGAATTGGAGGTTTTATCAAGGTAAGGCAATATGATCAGATAATGATAGAGATCTGTGGAAAAAAGGCTATAGGTACAGTGTTAGTAGGACCTACACCTATCAACATAATTGGACGAAATATGTTGACTCAGCTTGGTTGTACTTTAAATTTCCCAATTAGTCCTATTGACACTGTACCAGTAAAATTAAAGCCAGGAATGGATGGACCAAAGGTTAAACAGTGGCCATTAACAGAAGAAAAAATAAAAGCATTA…
041806_2017_AE	~~~~~~~~~~~~~~~TGGCAACGACCCCTTGTCTCAATAAAAATAGGAGGACAGATAAGAGAAGCTCTATTAGATACAGGAGCAGATGATACAGTATTAGAAGATATAAATTTGCCAGGAAAATGGAAACCAAAAATGATAGGGGGAATTGGAGGTTTTATCAAGGTAAGGCAATATGATCAGATAAGTATAGAAATTTGTGGAAAAAAGGCTATAGGTACAGTGCTAGTAGGACCTACACCTATCAACATAATTGGACGAAATATGTTGACTCAGCTTGGTTGTACTTTAAATTTCCCAATTAGCCCTATTGACACTGTACCAGTAAAATTAAAGCCAGGAATGGATGGACCAAAGGTTAAACAGTGGCCATTAACAGAAGAAAAAATAAAAGCATTA…
303292_2017_AE	CCTCAAATCACTCTTTGGCAACGACCCCTTGTCACAATAAAAATAGGAGGACAGCTAAAAGAAGCTCTATTAGATACAGGAGCAGATGATACAGTATTAGAAGATATAAATTTGCCAGGAAAATGGAAACCAAAAATGATAGGGGGAATTGGAGGTTTTATCAAAGTAAGGCAATATGATCAGATACCTATAGAAATTTGTGGAAAAAAGGCTATTGGTACAGTGTTAGTAGGACCCACACCTGTCAACATAATTGGACGAAATATGTTGACTCAGCTTGGTTGTACTTTAAATTTCCCAATTAGCACTATTGACACTATACCAGTAACATTAAAGCCAGGAATGGATGGACCAAAGGTTAAACAATGGCCATTAACAGAAGAAAAAATAAAAGCATTA…
303302_2017_AE	CCTCAAATCACTCTTTGGCAACGACCCCTTGTCACAGTAAAAATAGGAGGACAGATRAGAGAAGCTCTATTAGATACAGGAGCAGATGATACAGTATTAGAAGATATAAATTTGCCAGGAAAATGGAAACCAAAAATGATAGGGGGAATTGGAGGTTTTATCAAAGTAAGGCAGTATGATCAGATAACWATAGAGATTTGKGGGAAAAAAGCTATAGGTACAGTGTTRGTAGGACCTACACCTATCAACATAATTGGACGAAATATGTTGGCTCARATTGGTTGTACTTTAAATTTCCCAATTAGCCCTATTGACACTGTACCAGTAACATTAAAGCCAGGAATGGATGGACCAAAGGTTAAACAGTGGCCATTAACAGAAGAAAARATAAAAGCMTTA…
303304_2017_AE	CCTCAAATCACTCTTTGGCAACGACCCCTTGTCACAGTAAAGATAGGAGGGCAGATAAAAGAAGCTCTGTTAGATACAGGAGCAGATGATACAGTATTAGAAGATATAAATTTGCCAGGAAAATGGAAACCAAAAATGATAGGGGGAATTGGAGGTTTTATCAAGGTAAGACAATATGATCAGATACTTATAGAAATTTGTGGGAAAAAAGCTATAGGTACAGTGTTAGTAGGACCTACACCTGTCAACATAATTGGACGAAATATGTTGACTCAGATTGGTTGTACTTTAAATTTCCCAATTAGCCCTATTGACACTGTACCAGTAACATTAAAGCCAGGRATGGATGGACCAAAGATTAAACAGTGGCCATTAACAGAAGAAAAAATAAAAGCATTA…
042509_2017_AE	~~~~~~~~~~~~~~~TGGCAACGACCCCTTGTCACAGTAAAGATAGAAGGACAGATGAAAGAAGCTCTATTAGATACAGGAGCAGATGATACAGTATTAGAAGATATAAATTTGCCAGGAAAATGGAAACCAAAAATGATAGGGGGAATTGGAGGTTTTATCAAAGTAAGGCAATATGATCAGATACTTATAGAAATTTGTGGGAAAAAGGCTATAGGTACAGTGTTAGTAGGACCTACACCTGTCAACATAATTGGACGAAATATGTTGACTCAGATTGGTTGTACTTTAAATTTCCCAATTAGTAACATTGATACTGTACCAGTAACATTAAAGCCAGGAATGGATGGGCCAAAGGTTAAACAGTGGCCATTAACAGAAGAAAAAATAAAAGCATTA…
042510_2017_AE	~~~~~~~~~~~~~~~TGGCAACGACCCCTTGTCACAGTAAAAATAGGAGGACAGATAAAAGAAGCTYTATTAGATACAGGAGCAGATGATACAGTATTAGAAGATATAAATTTGCCAGGAAAATGGAAACCAAAAATGATAGGGGGAATTGGAGGTTTTATCAAAGTAAGGCAATATGATCAGATACTTATAGAAATTTGTGGGAAAAAAGCGATAGGTACAGTGTTAGTAGGACCTACACCTGTCAACATAATTGGACGAAATATGTTGACTCAGATTGGTTGTACCTTAAATTTYCCAATTAGCCCTATTGACACTGTACCAGTAACATTAAAGCCAGGAATGGATGGACCAAAGGTTAAACAGTGGCCATTAACAGAAGAAAAAATAAAAGCATTA…
303301_2017_AE	CCTCAAATCACTCTTTGGCAACGACCCGTTGTCACAGTAAAARTAGAGGGACAGATGAGAGAAGCTCTATTAGATACAGGAGCAGATGATACAGTATTAGAAGATATAAATTTGCCAGGAAAATGGAAACCAAAAATGATAGGGGGAATTGGAGGTTTTATCAAGGTAAGGCAATATGATCAGATACTTATAGAAATTTATGGAAAAAAGGCTATAGGTACAGTGTTAGTAGGACCTACACCTGTCAACATAATTGGGCGAAATATGTTGACTCAGATTGGTTGTACTTTAAATTTCCCAATTAGCCCTATTGACACTGTACCAGTAAAATTAAAGCCAGGAATGGATGGACCAAAGGTTAAACAGTGGCCATTAACAGAAGAAAAAATAAAAGCATTA…
050204_2017_AE	~~~~~~~~~~~~~~~TGGCAACGACCCGTTGTCACAGTAAAARTAGCAGGACAGATGAAAGAAGCTCTATTAGATACAGGAGCAGATGATACAGTATTAGAAGATATAAATTTGCCAGGAAAATGGARACCAAAAATGATAGGGGGAATTGGAGGTTTTATCAAAGTAAGGCAATATGATCAGATACCTATAGAAATTTGTGGAAAACAGGCTATAGGGACAGTGTTAGTAGGACCTACACCTGTCAACATAATTGGACGAAATATGTTGACTCAGATTGGTTGTACTTTAAATTTYCCAATTAGTCCCATTGACACTGTACCAGTAGCATTAAAGCCAGGAATGGATGGACCAAAGGTTAAACAGTGGCCATTAACAGAAGAAAAAATAAAAGCATTA…
050206_2017_AE	~~~~~~~~~~~~~~~TGGCAACGACCTCTTGTCACAGTAAAAATAGGAGGACAGATGAAAGAAGCTCTATTAGATACAGGAGCAGATGATACAGTCTTAGAAGATATAAATTTGCCAGGAAAATGGAAACCAAAAATGATAGGGGGAATTGGAGGTTTTATCAAGGTAAAACAATATGATCAGATACTTATAGAAATTTGTGGAAAAAAGGCTATAGGTACAGTGTTAGTAGGACCTACACCTGTCAACATAATTGGACGAAAYATGTTGACTCAGATTGGTTGTACTTTAAATTTTCCAATTAGTCCTATTGACACAGTACCAGTAACATTAAAGYCAGGAATGGATGGACCAAAGGTTAAACAGTGGCCATTAACAGAAGAAAAAATAAAAGCATTA…
303325_2017_AE	CCTCAAATCACTCTTTGGCAACGACCCCTTGTCACAGTAAAAGTAGGAGGACAGCTGAAAGAAGCTCTATTAGATACAGGAGCAGATGATACAGTATTAGAAGATATAAATTTGCCAGGAAAATGGAAACCAAAAATGATAGGGGGAATTGGAGGTTTTATCAAAGTAAGGCAATATGATCAGATACCTATAGAAATTTGTGGAAAAAAGGCTATAGGTACAGTGTTAGTAGGACCTACACCTGTCAACATAATTGGACGAAATATGTTGACTCAGCTTGGTTGTACTTTAAATTTCCCAATTAGCCCTATTGACACTGTACCAGTAGCATTAAAGCCAGGAATGGATGGACCAAAGGTTAAACAGTGGCCATTAACAGAAGAAAAAATAAAAGCATTA…
050909_2017_AE	~~~~~~~~~~~~~~~TGGCAACGACCTGTTGTCACAGTAAAAATAGAAGGACAGATAARAGAAGCTCTATTAGACACAGGAGCAGATGATACAGTATTAGAAGATATAAATTTGCCAGGAAATTGGAAACCAAAAATGATAGGGGGAATTGGAGGTTTTATCAAGGTAAAACAATATGATCAGATACTTATAGAAATTTGTGGAAAAMGRGCTATAGGTACAGTRTTAGTAGGACCTACACCTGTCAACATAATTGGACGAAATATGTTGACTCAGATTGGTTGTACTTTAAATTTCCCAATTAGTCCTATTGAAACTGTACCAGTAAAATTAAAGCCAGGAATGGATGGACCAAAGGTTAAACAGTGGCCATTAACAGAAGAAAAAATAAAAGCATTA…
050908_2017_AE	~~~~~~~~~~~~~~~TGGCARCGACCCCTYGTCACAGTAAAAATAGRAGGACAGATGAGAGAAGCTCTATTAGATACAGGAGCAGATGATACAGTATTAGAAGATATAAATTTGCCAGGAAAATGGAAACCAAAAATGATAGGGGGAATTGGAGGTTTTATCAARGTAAAGCAATATGATCAGATACTTATAGAAATTTGTGGAAAAARGGCTATAGGTACAGTGTTAGTAGGACCTACACCTGTCAACATAATTGGAMGAAATATGTTGACTCAGATTGGATGTACTTTAAATTTCCCAATTAGCCCTATTGAMACTGTACCAGTAAAATTAAAGCCAGGAATGGATGGACCAAAGGTYAAACARTGGCCATTAACAGAAGAAAAGATAAAAGCATTA…
050918_2017_AE	~~~~~~~~~~~~~~~TGGCAACGACCTCTTGTCACARTAAAAATAGGAGGACARGTRARRGAAGCTCTRTTAGATACAGGAGCAGATGATACAGTATTAGAAGAKATAAATTTGCCAGGAAAATGGAAACCAAAAATGATAGGGGGAATTGGAGGTTTTATCAAGGTMAGRCAATATGATCAGATAWCTATRGAAATTTGTGGAAAAAAGGCTATAGGTACAGTGTTAGTAGGACCTACACCTRTCAACATAATTGGACGAAATATGTTGACTCAGMTTGGTTGTACTTTAAATTTCCCAATTAGCCMTATTGACACTGTACCAGTAAARTTAAARCCAGGAATGGATGGACCAAAGGTTAAACARTGGCCATTAACAGAAGAAAAAATAAARGCATTA…
050917_2017_AE	~~~~~~~~~~~~~~~TGGCAACGACCCGTTGTCACAGTAAAAATAGAAGGACAGATGAGAGAAGCTCTATTAGATACAGGAGCAGATGATACAGTATTAGAAGATATAAATTTGCCAGGAAAATGGAAACCAAAAATGATAGGGGGAATTGGAGGTTTTATCAAGGTAAGGCAATATGATSAGATAACTATAGAAATTTGTGGAAAAAAGGCTATAGGTWCAGTGTTAGTAGGACCTACACCTGTCAACATAATTGGACGAAAYATGYTGACTCAGCTTGGTTGTACTTTAAATTTCCCAATTAGCCCTATTGACACTGTACCAGTAACATTAAAGCCAGGAATGGATGGRCCAAAGGTTAAACAGTGGCCATTAACAGAAGARAAAATAAAAGCATTA…
050906_2017_AE	~~~~~~~~~~~~~~~TGGCAACGACCCCTTGTCTCAATAAAAGTAGGAGGTCARATAAAAGAAGCTCTATTAGATACAGGAGCAGATGATACAGTATTAGAAGATATAAATTTGCCAGGAAAATGGAAACCAAAAATGATAGGGGGAATTGGAGGTTTTATCAAGGTAAGGCAATATGATCAGATATCTATAGAAATTTGTGGAAAAAGRGCCATAGGTACAGTGTTAGTAGGACCTACACCTATCAACATAATTGGACGAAATATGTTGACTCAGATTGGTTGTACTTTAAATTTYCCAATTAGCCCTATTGACACTGTACCAGTAAAATTAAAGCCAGGAATGGATGGACCAAAGGTTAAACAGTGGCCATTAACAGAAGAAAAAATAAAAGCATTA…
050903_2017_AE	~~~~~~~~~~~~~~~TGGCAACGACCCCTTGTCTCAATAAAAGTAGGAGGACAGATAAAAGAAGCTCTATTAGATACAGGAGCAGATGATACAGTATTAGAAGATATAAATTTGCCAGGAAAATGGAAACCAAAAATGATAGGGGGAATTGGAGGTTTTATCAAGGTAAGGCAATATGATCAGGTACTTATAGAAATTTGTGGGAAAAAGGCTATAGGTACAGTGTTAGTAGGACCTACACCTRTCAACATAATTGGACGAAATATGTTGACTCAGATTGGTTGTACTATAAATTTCCCAATTAGCCCTATTGACACTGTACCAGTAAAATTAAAGCCAGGAATGGATGGACCAAAGGTTAAACAGTGGCCATTAACAGAAGAAAAAATAAAAGCATTA…
303309_2017_AE	CCTCAAATCACTCTTTGGCAACGACCCCTTGTCACAGTRAGAATAGAAGGACAGATAAAAGAAGCTCTATTAGATACAGGAGCAGATGATACAGTATTAGAAGATATAAATTTGCCAGGAAAATGGAAACCAAAAATGATAGGGGGAATTGGAGGTTTTATCAAAGTAAGGCAATATGATCAGATACTTATAGAAATTTGTGGGAAAAAGGCTATAGGTACAGTGTTAGTAGGACCCACACCTATCAACATAATTGGACGTAATATGTTGACTCAGCTTGGTTGTACTTTAAATTTCCCAATTAGCCCTATTGAMACTGTACCAGTAACATTAAAGCCAGGAATGGATGGACCAAAGGTTAAACAATGGCCATTAACAGAAGAAAAAATAAAAGCATTA…
303331_2017_AE	~~~~~~~~~~~~~~~TGGCAACGACCYCTTGTYWCMATAAARATAGGRGGACAGATAARRGAAGCTCTAYTAGATACAGGAGCAGATGATACAGTATTAGAAGATATAAATTTGCCAGGAAAATGGAAACCAAAAATGATAGGGGGAATTGGAGGTTTTATCAARGTAAGGCAATATGATCAGATAAGTATAGAAATTTGTGGAAAAAAGGCTATAGGTACAGTGCTAGTAGGACCTACACCTATCAACATAATTGGACGAAATATGTTGACTCAGCTTGGTTGTACTTTAAATTTCCCAATTAGCCCTATTGACACTGTACCAGTAAAATTAAAGCCAGGAATGGATGGACCAAARGTTAGACAGTGGCCATTAACAGAAGAAAAAATAAAAGCATTA…
303588_2017_AE	CCTCAAATCACTCTTTGGCAACGACCCCTTGTCACAATAAAAATAGGAGGACAGATAAAAGAAGCTCTATTAGATACAGGAGCAGATGATACAGTATTAGAAGATATAAATTTGCCAGGAAAATGGAAACCAAAAATGATAGGGGGAATTGGAGGTTTTATCAAGGTAAGGCAATATGATCAGATACTTATAGAAATTTGTGGAAAAAAGGCTATAGGTACAGTGTTAGTAGGACCTACACCTGTCAACATAATTGGACGAAATATGTTGACTCAGCTTGGTTGTACTTTAAATTTCCCAATTAGCCCTATTGACACTGTACCAGTAACATTAAAGCCAGGAATGGATGGACCAAAGGTTAAACAGTGGCCATTAACAGMAGAAAAAATAAAAGCATTA…
303322_2017_AE	~~~~~~~~~~~~~~~TGGCAACGACCCATTGTCACAGTAAAAATAGGAGGACAAATGAGAGAAGCTCTATTAGATACAGGAGCAGATGATACAGTACTAGAAGATATAAATTTACCAGGAAAATGGAAACCAAAAATGATAGGGGGAATTGGAGGTTTTATCAAGGTAAGGCAATATGATCAGGTACTTATAGAAATTTGTGGGAAAAAAGCTATAGGTACAGTGTTAGTAGGACCTACACCTGTCAACATAATTGGACGAAATATGTTGACTCAGATTGGTTGTACTTTAAATCTCCCAATTAGCCCTATTGACACTGTACCAGTRACATTAAAGCCAGGAATGGATGGACCAAAGGTTAAACAGTGGCCATTAACAGAAGAAAAAATAAAAGCATTA…
051611_2017_AE	~~~~~~~~~~~~~~~TGGCAACGACCCCTTGTCCCAATAAAAATAGGAGGACAGATRARAGAAGCTCTATTAGATACAGGAGCAGATGATACAGTATTAGAAGATATAAATTTGCCAGGAAAATGGAAGCCAAAAATGATAGGGGGAATTGGAGGTTTTATCAAAGTAAGGCAATATGATCAGATACCTATAGAAATTTGTGGAAAAAAGGCTATAGGTTCAGTGTTAGTAGGACCTACACCTGTCAACATAATTGGACGAAATATGTTGACTCAGCTTGGTTGTACTTTAAATTTCCCAATTAGTCCTATTGACACTGTACCAGTAACATTAAAGCCAGGAATGGATGGACCAARGGTTAAACAGTGGCCATTAACAGAAGAAAAAATAAAAGCATTA…
051609_2017_AE	~~~~~~~~~~~~~~~TGGCAACGACCCCTTGTCRCAATAARARTAGGAGGACAGCTGAGAGAAGCTCTATTAGATACAGGAGCAGATGATACAGTATTAGAAGATATAAATTTGCCAGGAAAATGGAAGCCAAAAATGATAGGGGGAATTGGAGGTTTTATCAAAGTAAGGCAATATGATCAGATACTTATAGAAATTTGTGGAAAAAAGGCTATTGGTACAGTGTTAGTGGGACCTACACCTATCAACATAATTGGACGAAATATGTTGACTCAGCTTGGTTGTACTTTAAATTTCCCAATTAGCCCTATTGACACTGTACCAGTAAAATTAAAGCCAGGAATGGATGGACCAAAGGTTAAACAGTGGCCATTAACAGAAGAAAAAATAAAGGCATTA…
051624_2017_AE	~~~~~~~~~~~~~~~TGGCAACGACCCCTTGTCACAATAAAAGTAGGAGGACAGATCAAAGAAGCTCTATTAGATACAGGAGCAGATGATACAGTATTAGAAGATATAAATTTGCCAGGAAAATGGAAACCAAAAATGATAGGGGGAATTGGAGGTTTTATCAAAGTAAGGCAATATGATCAGATACTTATAGAAATTTGTGGAAAAAAGGCTATAGGTACAGTGTTAGTAGGACCTACACCTATCAACATAATTGGACGAAATATGTTGACTCAGCTTGGTTGTACTTTAAATTTCCCAATTAGCACTATTGACACTGTACCAGTAACATTAAAGCCAGGAATGGATGGACCAAAGGTTAAACAGTGGCCATTAACAGAAGAAAAAATAAAAGCATTA…
051622_2017_AE	~~~~~~~~~~~~~~~TGGCAACGACCCCTTGTCACARTAAAAATAGGAGGACAGATGAAAGAAGCTCTATTAGATACAGGAGCAGATGATACAGTATTAGAAGATATAAATTTGCCAGGAAAATGGAAACCAAAAATGATAGGGGGAATTGGAGGTTTTATCAAGGTRAGGCAATATGATCAGATAGTTATAGAAATTTGTGGAAAAAGAGCTATAGGTACAGTGTTAGTAGGACCTACACCTGTCAACATAATTGGACGAAATATGTTGACTCAGATTGGYTGTACTTTAAATTTCCCAATTAGCCCTATTGACACTGTACCAGTAACATTAAAGCCAGGAATGGATGGACCAAAGGTTAAACAGTGGCCATTAACAGAAGAAAAAATAAAAGCATTA…
303323_2017_AE	~~~~~~~~~~~~~~~TGGCAACGACCCCTTGTCACAGTAAAAATAGGGGGACAGATGAAAGAAGCTCTATTAGATACAGGAGCAGATGATACAGTATTAGAAGATATAAATTTGCCAGGAAAATGGAAACCAAARATGATAGGGGGAATTGGAGGTTTTATCAAGGTAAGACAATATGATCAGATACTTATAGAAATTTGTGGAAAAAAGGCTATAGGTACAGTGTTAGTAGGACCTACACCTGTCAACATAATTGGGCGAAATATGTTGACTCAGATTGGCTGTACTTTAAATTTCCCAATTAGTCCTATTGACACTATACCAGTAACATTAAAGCCAGGAATGGATGGACCAAAGGTTAAGCAGTGGCCATTATCAGAAGAAAAAATAATAGCATTA…
051601_2017_AE	~~~~~~~~~~~~~~~TGGCAACGACCCATCGTCACAGTAAAAATAGGAGGACAGYTGAAAGAAGCTCTATTAGATACAGGAGCAGATGATACAGTATTAGAAGATATAAATTTGCCAGGAAAATGGAARCCAAAAATGATAGGGGGAATTGGAGGTTTTATCAAAGTWAGGCAATATGATCAGRTACCTATAGAAATTTGTGGRAAAAGGGCTGTAGGTACAGTGTTAGTAGGRCCTACACCTGTCAACATAATTGGAMGAAATATGTTGACTCAGATTGGYTGTACTTTAAATCTCCCAATTAGYCCTATTGACACTGTACCAGTAACAYTAAAGCCAGGAATGGATGGACCAAAGGTTAAACAGTGGCCATTAWCAGAAGAAAAAATAAAAGCATTA…
051618_2017_AE	~~~~~~~~~~~~~~~TGGCAACGACCTCTTGTCACAGTAAAAATAGGGGGACAGATGAAAGAAGCTCTATTAGAYACAGGAGCAGATGATACAGTAYTAGAAGATATAAATTTGCCAGGAAAATGGAAACCAAAAATGATAGGGGGAATTGGAGGTTTTATCAAGGTAAAGCAATATGATCAGGTACTTATAGAAATTTGTGGAAAAAAGGCCATAGGTACAGTATTAGTAGGACCTACACCTATCAATATAATTGGGCGAAATATGTTGACTCAGATTGGTTGTACTTTAAATTTCCCAATTAGTCCTATTGACACTGTACCAGTAACATTAAAGCCAGGAATGGATGGACCAAAAGTTAAACAGTGGCCATTAACAGAAGAAAAAATAAAAGCATTA…
303326_2017_AE	~~~~~~~~~~~~~~~TGGCAACGACCCCTTGTCACAGTAAAAATAGGAGGACAGGTGAAAGAAGCTCTATTAGATACAGGAGCAGATGATACAGTATTAGAAGATATAAATTTGCCAGGAAAATGGAAACCAAAAATGATAGGGGGAATTGGAGGTTTTATCAAGGTAAGGCAATATGATCAGGTAACTATAGATATTTGTGGAAAAAGAGCTATAGGTACAGTGTTAGTAGGACCTACACCTGTCAACATAATTGGACGAAATATGTTGACTCAGATTGGTTGTACTTTAAATTTCCCAATTAGCCCTATTGACACTGTACCAGTAACATTAAAGCCAGGAATGGATGGACCAAAGGTTAAACAGTGGCCATTAACAGAAGAAAAAATAAAAGCATTA…
051606_2017_AE	~~~~~~~~~~~~~~~TGGCAACGACCCCTTGTCACAATAARAATAGGAGGRCAGGTGAAAGAAGCTCTATTAGATACAGGAGCAGATGATACAGTATTAGAAGATATAGATTTGCCAGGAAAATGGAAACCAAAAATGATAGGGGGAATTGGAGGTTTTATCAARGTAAGGCAATATGATCAGATACTTATAGAAATTTGTGGAAAAAGGGCTATAGGTACAGTATTAGTAGGACCTACACCTGTCAACATAATTGGACGAAACATGTTGACTCAGCTTGGTTGTACTTTAAATTTCCCAATTAGCCCYATTGAHACTGTACCAGTAACATTAAAGCCAGGAATGGATGGGCCAAAGGTTAAACAGTGGCCATTAACAGAAGAAAAAATAAAAGCATTA…
322467_2017_AE	CCTCAAATCACTCTTTGGCAACGACCCATTGTTGCAGTAAGAATAGGAGGACAGATGATAGAAGCTCTATTAGACACAGGAGCAGATGATACAGTATTAGAAGATATAAATTTGCCAGGAAAATGGAAACCAAAAATGATAGGGGGAATTGGAGGTTTTATCAAGGTAAGGCAATATGATCAGATACTTATAGAAATTTATGGAAAAAGGGCTATAGGTACAGTGTTAGTAGGACCTACACCTGTCAACATAATTGGACGAAATATGTTGACTCAGATTGGTTGTACTTTAAATCTCCCAATTAGTCCTATTGACACTGTACCAGTAAAATTAAAGCCAGGAATGGATGGACCAAAGGTTAAACAGTGGCCATTAACAGAAGAAAAAATAAAAGCATTA…
052306_2017_AE	~~~~~~~~~~~~~~~TGGCAACGACCCCTTGTCACAATAAAAATAGGAGGACAGATAAAAGAAGCTCTATTAGATACAGGAGCAGATGATACAGTATTAGAAGATATAAATTTGCCAGGAAAATGGAAACCAAAAATGATAGGGGGAATTGGAGGTTTTATCAARGTAARGCAATATGATCAGATACYTATAGAAATTTGTGGAAAAAAGGCTATAGGTACAGTGTTAGTAGGACCTACACCTRTCAACATAATTGGACGAAATWTGTTGACTCAGMTTGGTTGTACTTTAAATTTCCCAATTAGYCCTATTGACACTGTACCAGTAACATTAAAGCCAGGAATGGATGGACCAAAGGTTAAACAGTGGCCATTRACAGAAGAAAAAATAAARGCAYTA…
052309_2017_AE	~~~~~~~~~~~~~~~TGGCAACGACCCCTTGTCACAGTAAAGATAGAAGGACAGATGAAAGAAGCTCTATTAGATACAGGAGCAGATGATACAGTATTAGAAGATATAAATTTGCCAGGAAAATGGAAACCAAAAATGATAGGGGGAATTGGAGGTTTTATCAAAGTAAGGCAATATGATCAGATACTTATAGAAATTTGTGGGAAAAAGGCTATAGGTACAGTGTTAGTAGGACCTACACCTGTCAACATAATTGGACGAAATATGTTGACTCAGATTGGTTGTACTTTAAATTTCCCAATTAGTAACATTGATACTGTACCAGTAACATTAAAGCCAGGAATGGATGGGCCAAAGGTTAAACAGTGGCCATTAACAGAAGAAAAAATAAAAGCATTA…
303329_2017_AE	~~~~~~~~~~~~~~~TGGCAACGACCCCTTGTCACAATAAAAGTAGGAGGACARATGAGAGAAGCTCTATTAGACACAGGAGCAGATGATACAGTATTAGAAGATATAAATTTGCCAGGAAAATGGAAACCAAAAATGATAGGGGGAATTGGAGGTTTTATCAAAGTAAGACAGTATGATGARATACCTATAGAAATTTGTGGAAAAARGGCTATAGGTACAGTGTTAGTAGGACCTACACCTATCAACATAATTGGACGAAATATGTTGACTCAGCTTGGTTGTACTTTAAATTTCCCAATTAGCCCTATTGACACTGTACCAGTAAAATTAAAGCCAGGAATGGATGGACCAAAGGTCAAACAGTGGCCATTAACAGCAGAAAAAATAAAAGCATTA…
052303_2017_AE	~~~~~~~~~~~~~~~TGGCAACGACCCCTTGTCACAGTAAAAGTAGGAGGACAGATGAGAGAAGCTCTATTAGATACAGGRGCAGATGATACAGTATTAGAAGATATAAATTTGCCAGGAAAATGGAARCCAAAAATGATAGGGGGAATTGGAGGTTTTATCAAGGTAAAGCAATATGATCAGATAGTTATAGAAATTTGTGGAAAAAAGGCTATAGGTACAGTGTTAGTAGGACCTACACCTATCAACATAATTGGACGAAATATGTTGACTCAGATTGGTTGTACTTTAAATTTCCCAATTAGCCCTATTGACACKGTACCAGTAAAATTAAAGCCAGGAATGGATGGACCAAAGGTTAAACAGTGGCCATTAACAGAAGAAAAAATAAAGGCAYTA…
052316_2017_AE	~~~~~~~~~~~~~~~TGGCAACGACCCCTTGTCACAATAAAAATAGGAGGACAGATGAAAGAAGCTCTATTAGATACAGGAGCAGATGATACAGTATTAGAAGATATAAATTTGCCAGGAAAATGGAAACCAAAAATGATAGGGGGAATTGGAGGTTTTATCAAAGTAAGGCAATATGATCAGATACCTATAGAAATTTGTGGAAAAAGGGCTRTAGGTACAGTGTTARTAGGACCTACACCTGTCAACATAATTGGACGAAATATGTTGACTCAGATTGGTTGTACTTTAAATTTYCCAATTAGCCCTATTGACACTGTACCAGTAACATTAAAGCCAGGAATGGATGGGCCAAAGGTTARACAATGGCCATTAACAGAAGAAAAAATAAAAGCATTA…
303330_2018_AE	cctcaaatcactctttggcaacgaccccttgtcacaataaaaataggaggacagatgagagaagctctattagatacaggagcagatgatacagtattagaagatataaatttgccaggaaaatggaaaccaaaaatgatagggggaattggaggttttatcaaggtaagacaatatgatcagatacttatagaaatttgtggaaagaaagctataggtacagtgttagtaggacctacacctatcaacataattggacgaaatatgttgactcagcttggttgtactttaaatttcccaattagccctattgacactgtaccagtaaaattaaagccaggaatggatggaccaaaggttaaacagtggccattaacagaagaaaaaataaaagcatta…
052302_2017_AE	~~~~~~~~~~~~~~~TGGCAACGACCCCTTGTCTCAATAAAAGTAGGAGGACAGATAAAAGAAGCTCTATTAGATACAGGAGCAGATGATACAGTATTAGAAGATATAAATTTGCCAGGAAAATGGAAACCAAAAATGATAGGGGGAATTGGAGGTTTTATCAAGGTAAGGCAATATGATCAGGTACTTATAGAAATTTGTGGAAAAAAGGCTATAGGTACAGTGTTAGTAGGACCTACACCTGTCAACATAATTGGACGAAATATGTTGACTCAGATTGGTTGTACTTTAAATTTCCCAATTAGCCCTATTGACACTGTACCAGTAAAATTAAAGCCAGGAATGGATGGACCAAAGGTTAAACAGTGGCCATTAACAGAAGAAAAAATAAAAGCATTA…
130027_2017_AE	~~~~~~~~~~~~~~~TGGCAACGACCCCTTGTCACAGTAAAAATAGGAGGACAGATGAAAGAAGCTCTATTAgATACAGGAGCAGATGATACAGTATTAGAAGAGATAAATTTGCCAGGAAAATAGAAACCAAAAATAATAGGGGGAATTGGAGGTTTTATCAAGGTAAAGCAATATGATCAGATACTTATAAAAATTTGTGGAAAAAAGGCTATAGGTACAGTGTTAGTAGGACCTACACCTGTCAACATAATTGGACGAAATATGTTGACTCAGATTGGTTGTACTTTAAATTTCCCAATTAGTCCCATTGACACTGTACCAGTAAAATTGAAGCCAGGAATGGATGGACCAAGGGTTAAACAGTGGCCATTAACAGAAGAAAAAATAAAAGCATTA…
130028_2017_AE	~~~~~~~~~~~~~~~TGGCAACGACCCCTTGTCCCAATAAAARTAGGRGGACAGATGAGAGAAGCTCTATTAGATACAGGAGCAGATGATACAGTATTAGAAGATATAAATTTGCCAGGAAAATGGAAACCAAAAATGATAGGGGGAATTGGAGGTTTTATCAAAGTAAGGCAATATGATCAGATACCTATAGAAATTTGTGGAAAAAAGGCTATAGGTACAGTGCTAGTAGGACCTACACCTGTCAACATAATTGGACGAAATATGTTGACTCAGCTTGGTTGTACTTTAAATTTYCCAATTAGCCCTATTGACACTGTACCAGTAACATTAAAGCCAGGAATGGATGGACCAAAGGTTAAACAGTGGCCATTAACAGAAGAAAAAATAAAAGCATTA…
[truncated: 1,068 more rows]
